# Supplementary material for: Permeant fluorescent probes visualize the activation of SARM1 and uncover an anti-neurodegenerative drug candidate
Source: eLife. 2021 May 4;10:e67381. doi: 10.7554/eLife.67381 (PMC8143800; doi:10.7554/eLife.67381)
Supplement: Figure 1—source data 1. [file elife-67381-fig1-data1.xlsx]

## Sheet: 1D
					Fig 1D. The kinetics of the fluorescence increase at the maximal absorbance wavelengths
				X axis	y axis: RFU
				Time (min)	PC5			PC6			PC7			PC8
				0	3288	3250	3338	1991	2606	3496	883	1021	1121	617	755	862
				5	3958	4073	4270	7662	9364	10974	1392	1436	1454	1371	1620	1805
				10	5058	5156	5362	15903	17527	19288	1664	1666	1723	2558	2904	3146
				15	6048	6050	6235	23253	24965	26418	1845	1884	1887	4005	4385	4460
				20	6721	6668	6879	28990	31005	31941	2019	2060	2027	5237	5560	5761
				25	7310	7180	7315	33079	35217	36172	2138	2133	2107	6366	6602	6716
				30	7637	7592	7630	36368	38115	38649	2233	2251	2235	7240	7521	7547
				35	7888	7735	7857	38149	39131	39769	2304	2324	2276	7859	8135	8103
				40	7969	7887	7971	38829	40089	40412	2361	2391	2357	8281	8642	8652
				45	8077	8003	8128	38876	39754	40067	2408	2439	2400	8511	8781	8760
				50	8092	8026	8081	38936	39838	39834	2448	2486	2435	8776	8885	9091

## Sheet: 1E
				Fig 1E. Time-dependent changes of the emission spectra at the isosbestic point (350 nm)
				x axis	y axis: RFU
				wavelength (nm)	0 min	5 min	10 min	15 min	20 min	25 min	30 min	35 min	40 min	45 min	50 min
				380	1616	1506	1456	1364	1298	1266	1236	1221	1186	1154	1131
				390	2533	2378	2222	2103	2015	1940	1906	1824	1827	1749	1694
				400	3719	3533	3379	3160	3060	2904	2815	2707	2631	2587	2525
				410	4722	4490	4331	3931	3892	3740	3542	3415	3333	3307	3172
				420	5814	5516	5126	4895	4642	4428	4323	4186	4061	3949	3906
				430	6404	6124	5770	5422	5134	4951	4860	4655	4556	4391	4352
				440	6568	6242	5852	5550	5277	5121	4933	4820	4679	4583	4510
				450	6426	6110	5759	5504	5298	5170	5020	4840	4755	4693	4571
				460	6046	5822	5555	5377	5286	5137	5008	4963	4892	4763	4727
				470	5668	5494	5459	5411	5409	5449	5436	5435	5453	5344	5339
				480	5287	5318	5421	5618	5844	5998	6189	6257	6329	6381	6297
				490	4747	4987	5387	5923	6442	6791	7256	7450	7670	7772	7720
				500	4233	4601	5289	6183	6975	7629	8178	8681	8973	9033	9106
				510	3627	4196	5143	6249	7262	8238	8895	9408	9838	9979	10110
				520	2906	3645	4707	6047	7223	8231	9077	9604	9985	10321	10490
				530	2291	3033	4157	5502	6665	7658	8533	9181	9663	9775	9917
				540	1780	2456	3473	4690	5765	6789	7508	8218	8563	8700	8872
				550	1315	1895	2796	3787	4890	5863	6332	6710	7205	7413	7485
				560	915	1401	2188	3006	3726	4412	4867	5343	5571	5776	5773
				570	700	1084	1666	2380	2957	3563	3980	4284	4489	4658	4787
				580	508	821	1264	1795	2293	2694	3067	3275	3424	3540	3611
				590	353	591	912	1294	1652	1913	2139	2371	2490	2522	2578
				600	271	436	705	949	1217	1443	1615	1741	1826	1915	1958
				610	181	309	488	673	854	990	1088	1222	1308	1279	1339
				620	132	206	366	485	594	704	801	860	905	888	932
				630	98	168	264	367	449	542	590	628	675	657	689
				640	64	119	190	249	309	336	392	434	449	449	462
				650	65	93	141	179	223	280	279	295	328	350	326
				660	21	69	93	129	166	196	212	234	233	251	239
				670	16	65	80	104	139	157	168	186	188	208	210
				680	-16	57	70	85	117	132	130	131	152	144	155
				690	-9	39	68	66	105	99	121	112	106	137	130
				700	-7	31	43	65	71	69	78	79	100	120	109

## Sheet: 1F
				Fig 1F. HPLC analysis of PC6 reaction
				+PC6 T0			+PC6 T60			-PC6 T0			-PC6 T60
				Time (min)	mAU (260 nm)		Time (min)	mAU (260 nm)		Time (min)	mAU (260 nm)		Time (min)	mAU (260 nm)
				0.001867	0.027657		0.00645	0.403881		0.005417	-0.04768		0.006667	-0.04625
				0.008533	0.02861		0.013117	0.408173		0.012083	-0.04959		0.013333	-0.04244
				0.0152	0.029564		0.019783	0.412941		0.01875	-0.05293		0.02	-0.04053
				0.021867	0.030994		0.02645	0.417709		0.025417	-0.05674		0.026667	-0.04053
				0.028533	0.031948		0.033117	0.422478		0.032083	-0.06008		0.033333	-0.04339
				0.0352	0.030518		0.039783	0.425339		0.03875	-0.06294		0.04	-0.04864
				0.041867	0.02861		0.04645	0.426769		0.045417	-0.06437		0.046667	-0.05436
				0.048533	0.027657		0.053117	0.426292		0.052083	-0.0639		0.053333	-0.0596
				0.0552	0.02718		0.059783	0.426292		0.05875	-0.06151		0.06	-0.06342
				0.061867	0.027657		0.06645	0.426292		0.065417	-0.05865		0.066667	-0.06533
				0.068533	0.027657		0.073117	0.427246		0.072083	-0.05627		0.073333	-0.0639
				0.0752	0.028133		0.079783	0.429153		0.07875	-0.05531		0.08	-0.06008
				0.081867	0.02718		0.08645	0.431538		0.085417	-0.05579		0.086667	-0.05484
				0.088533	0.024319		0.093117	0.434399		0.092083	-0.05674		0.093333	-0.04911
				0.0952	0.021458		0.099783	0.436783		0.09875	-0.05674		0.1	-0.04482
				0.101867	0.021458		0.10645	0.43869		0.105417	-0.05579		0.106667	-0.04196
				0.108533	0.023365		0.113117	0.441551		0.112083	-0.05341		0.113333	-0.04053
				0.1152	0.026226		0.119783	0.445366		0.11875	-0.05102		0.12	-0.04053
				0.121867	0.029564		0.12645	0.448227		0.125417	-0.04911		0.126667	-0.04196
				0.128533	0.032425		0.133117	0.450611		0.132083	-0.04768		0.133333	-0.04387
				0.1352	0.033379		0.139783	0.452518		0.13875	-0.04721		0.14	-0.04387
				0.141867	0.031948		0.14645	0.454903		0.145417	-0.04721		0.146667	-0.04339
				0.148533	0.030041		0.153117	0.45681		0.152083	-0.04721		0.153333	-0.04339
				0.1552	0.029564		0.159783	0.458717		0.15875	-0.04721		0.16	-0.0453
				0.161867	0.030994		0.16645	0.460625		0.165417	-0.04721		0.166667	-0.04625
				0.168533	0.032902		0.173117	0.463009		0.172083	-0.04768		0.173333	-0.04578
				0.1752	0.035286		0.179783	0.464916		0.17875	-0.04864		0.18	-0.04578
				0.181867	0.03767		0.18645	0.466347		0.185417	-0.04959		0.186667	-0.04482
				0.188533	0.038624		0.193117	0.4673		0.192083	-0.05007		0.193333	-0.04292
				0.1952	0.038147		0.199783	0.466824		0.19875	-0.05007		0.2	-0.04005
				0.201867	0.037193		0.20645	0.466347		0.205417	-0.04959		0.206667	-0.03815
				0.208533	0.035763		0.213117	0.466824		0.212083	-0.04911		0.213333	-0.03719
				0.2152	0.035286		0.219783	0.469208		0.21875	-0.04816		0.22	-0.03672
				0.221867	0.035763		0.22645	0.471592		0.225417	-0.04768		0.226667	-0.03624
				0.228533	0.036716		0.233117	0.473976		0.232083	-0.04721		0.233333	-0.03672
				0.2352	0.036716		0.239783	0.47636		0.23875	-0.04768		0.24	-0.03672
				0.241867	0.034809		0.24645	0.477791		0.245417	-0.04911		0.246667	-0.03719
				0.248533	0.032902		0.253117	0.478268		0.252083	-0.05102		0.253333	-0.03767
				0.2552	0.030994		0.259783	0.477791		0.25875	-0.05245		0.26	-0.03862
				0.261867	0.029087		0.26645	0.477791		0.265417	-0.05293		0.266667	-0.0391
				0.268533	0.028133		0.273117	0.479221		0.272083	-0.05293		0.273333	-0.03815
				0.2752	0.029564		0.279783	0.480652		0.27875	-0.05388		0.28	-0.03719
				0.281867	0.033379		0.28645	0.481606		0.285417	-0.05436		0.286667	-0.03481
				0.288533	0.037193		0.293117	0.482559		0.292083	-0.05436		0.293333	-0.03338
				0.2952	0.039577		0.299783	0.48542		0.29875	-0.05388		0.3	-0.03195
				0.301867	0.041485		0.30645	0.488758		0.305417	-0.05484		0.306667	-0.03195
				0.308533	0.042915		0.313117	0.491619		0.312083	-0.05627		0.313333	-0.03338
				0.3152	0.043869		0.319783	0.495911		0.31875	-0.05674		0.32	-0.03529
				0.321867	0.043869		0.32645	0.500202		0.325417	-0.05674		0.326667	-0.03719
				0.328533	0.043869		0.333117	0.504017		0.332083	-0.05627		0.333333	-0.0391
				0.3352	0.043392		0.339783	0.505447		0.33875	-0.05579		0.34	-0.04053
				0.341867	0.044346		0.34645	0.505924		0.345417	-0.05674		0.346667	-0.04196
				0.348533	0.045776		0.353117	0.505447		0.352083	-0.0577		0.353333	-0.04339
				0.3552	0.047207		0.359783	0.505447		0.35875	-0.05865		0.36	-0.04387
				0.361867	0.048161		0.36645	0.506401		0.365417	-0.06008		0.366667	-0.0453
				0.368533	0.048161		0.373117	0.507355		0.372083	-0.06199		0.373333	-0.04578
				0.3752	0.048161		0.379783	0.507832		0.37875	-0.06294		0.38	-0.04673
				0.381867	0.047684		0.38645	0.508308		0.385417	-0.06294		0.386667	-0.04721
				0.388533	0.04673		0.393117	0.509262		0.392083	-0.06199		0.393333	-0.04673
				0.3952	0.044823		0.399783	0.510216		0.39875	-0.06199		0.4	-0.04578
				0.401867	0.043392		0.40645	0.510693		0.405417	-0.06294		0.406667	-0.04435
				0.408533	0.042915		0.413117	0.511646		0.412083	-0.06437		0.413333	-0.04339
				0.4152	0.041962		0.419783	0.513554		0.41875	-0.06628		0.42	-0.04196
				0.421867	0.039577		0.42645	0.515461		0.425417	-0.06866		0.426667	-0.04101
				0.428533	0.036716		0.433117	0.516891		0.432083	-0.072		0.433333	-0.04053
				0.4352	0.034332		0.439783	0.517845		0.43875	-0.07296		0.44	-0.04053
				0.441867	0.031471		0.44645	0.518322		0.445417	-0.07248		0.446667	-0.04053
				0.448533	0.029564		0.453117	0.518322		0.452083	-0.0701		0.453333	-0.04053
				0.4552	0.02861		0.459783	0.518322		0.45875	-0.06771		0.46	-0.04053
				0.461867	0.028133		0.46645	0.519276		0.465417	-0.06676		0.466667	-0.04101
				0.468533	0.028133		0.473117	0.521183		0.472083	-0.06628		0.473333	-0.04101
				0.4752	0.02718		0.479783	0.523567		0.47875	-0.06676		0.48	-0.04196
				0.481867	0.02718		0.48645	0.525951		0.485417	-0.06771		0.486667	-0.04339
				0.488533	0.02718		0.493117	0.529289		0.492083	-0.06819		0.493333	-0.04482
				0.4952	0.026703		0.499783	0.533104		0.49875	-0.06866		0.5	-0.04625
				0.501867	0.026703		0.50645	0.536442		0.505417	-0.06771		0.506667	-0.04673
				0.508533	0.026226		0.513117	0.538826		0.512083	-0.0658		0.513333	-0.0453
				0.5152	0.026226		0.519783	0.540257		0.51875	-0.06437		0.52	-0.04292
				0.521867	0.026226		0.52645	0.54121		0.525417	-0.06437		0.526667	-0.04053
				0.528533	0.028133		0.533117	0.542641		0.532083	-0.06533		0.533333	-0.03767
				0.5352	0.030041		0.539783	0.544548		0.53875	-0.06628		0.54	-0.03481
				0.541867	0.031948		0.54645	0.546932		0.545417	-0.06771		0.546667	-0.03338
				0.548533	0.033379		0.553117	0.55027		0.552083	-0.06914		0.553333	-0.03338
				0.5552	0.033855		0.559783	0.554085		0.55875	-0.0701		0.56	-0.03433
				0.561867	0.030994		0.56645	0.557899		0.565417	-0.0701		0.566667	-0.03529
				0.568533	0.026226		0.573117	0.56076		0.572083	-0.0701		0.573333	-0.03672
				0.5752	0.021458		0.579783	0.562191		0.57875	-0.072		0.58	-0.03862
				0.581867	0.016689		0.58645	0.563145		0.585417	-0.07343		0.586667	-0.04053
				0.588533	0.013351		0.593117	0.563622		0.592083	-0.07391		0.593333	-0.04196
				0.5952	0.011921		0.599783	0.563622		0.59875	-0.07439		0.6	-0.04435
				0.601867	0.012875		0.60645	0.564098		0.605417	-0.07486		0.606667	-0.04625
				0.608533	0.014782		0.613117	0.565529		0.612083	-0.07534		0.613333	-0.04721
				0.6152	0.015259		0.619783	0.566483		0.61875	-0.07534		0.62	-0.04625
				0.621867	0.014782		0.62645	0.566959		0.625417	-0.07486		0.626667	-0.0453
				0.628533	0.013828		0.633117	0.567436		0.632083	-0.07439		0.633333	-0.04435
				0.6352	0.013828		0.639783	0.568867		0.63875	-0.07343		0.64	-0.04435
				0.641867	0.013828		0.64645	0.570774		0.645417	-0.07105		0.646667	-0.04578
				0.648533	0.014782		0.653117	0.572205		0.652083	-0.06819		0.653333	-0.04768
				0.6552	0.016212		0.659783	0.573158		0.65875	-0.06485		0.66	-0.04959
				0.661867	0.017166		0.66645	0.574112		0.665417	-0.06199		0.666667	-0.05054
				0.668533	0.017643		0.673117	0.576496		0.672083	-0.0596		0.673333	-0.05007
				0.6752	0.016689		0.679783	0.578403		0.67875	-0.0596		0.68	-0.04816
				0.681867	0.015259		0.68645	0.580788		0.685417	-0.06294		0.686667	-0.0453
				0.688533	0.012875		0.693117	0.583172		0.692083	-0.06723		0.693333	-0.04244
				0.6952	0.010014		0.699783	0.585079		0.69875	-0.07105		0.7	-0.04053
				0.701867	0.008106		0.70645	0.586987		0.705417	-0.07296		0.706667	-0.04101
				0.708533	0.007629		0.713117	0.588894		0.712083	-0.07534		0.713333	-0.04292
				0.7152	0.007629		0.719783	0.590324		0.71875	-0.07725		0.72	-0.04482
				0.721867	0.007153		0.72645	0.590324		0.725417	-0.07772		0.726667	-0.04625
				0.728533	0.007629		0.733117	0.590801		0.732083	-0.07725		0.733333	-0.04864
				0.7352	0.009537		0.739783	0.591755		0.73875	-0.07772		0.74	-0.05102
				0.741867	0.011921		0.74645	0.593185		0.745417	-0.0782		0.746667	-0.05245
				0.748533	0.014305		0.753117	0.594139		0.752083	-0.07915		0.753333	-0.05102
				0.7552	0.015736		0.759783	0.594616		0.75875	-0.07915		0.76	-0.04911
				0.761867	0.015259		0.76645	0.596046		0.765417	-0.08011		0.766667	-0.04721
				0.768533	0.013351		0.773117	0.597954		0.772083	-0.08059		0.773333	-0.04625
				0.7752	0.01049		0.779783	0.600815		0.77875	-0.08011		0.78	-0.04578
				0.781867	0.007153		0.78645	0.603199		0.785417	-0.07915		0.786667	-0.04482
				0.788533	0.003815		0.793117	0.60606		0.792083	-0.07915		0.793333	-0.04435
				0.7952	0.001907		0.799783	0.607967		0.79875	-0.07915		0.8	-0.04578
				0.801867	0.002384		0.80645	0.608444		0.805417	-0.0782		0.806667	-0.04673
				0.808533	0.005245		0.813117	0.607491		0.812083	-0.07772		0.813333	-0.04673
				0.8152	0.008106		0.819783	0.606537		0.81875	-0.07725		0.82	-0.0453
				0.821867	0.01049		0.82645	0.606537		0.825417	-0.07915		0.826667	-0.04339
				0.828533	0.012398		0.833117	0.60606		0.832083	-0.08011		0.833333	-0.04244
				0.8352	0.012398		0.839783	0.606537		0.83875	-0.08059		0.84	-0.04244
				0.841867	0.01049		0.84645	0.609398		0.845417	-0.08059		0.846667	-0.04292
				0.848533	0.008106		0.853117	0.613689		0.852083	-0.08106		0.853333	-0.04339
				0.8552	0.005245		0.859783	0.617981		0.85875	-0.08154		0.86	-0.04482
				0.861867	0.004292		0.86645	0.619888		0.865417	-0.08106		0.866667	-0.04625
				0.868533	0.004768		0.873117	0.621319		0.872083	-0.08154		0.873333	-0.04721
				0.8752	0.006199		0.879783	0.622749		0.87875	-0.08202		0.88	-0.04721
				0.881867	0.006676		0.88645	0.62418		0.885417	-0.08202		0.886667	-0.04673
				0.888533	0.006676		0.893117	0.62561		0.892083	-0.08154		0.893333	-0.04673
				0.8952	0.007153		0.899783	0.626087		0.89875	-0.08106		0.9	-0.04673
				0.901867	0.006676		0.90645	0.626564		0.905417	-0.08202		0.906667	-0.04578
				0.908533	0.005722		0.913117	0.626564		0.912083	-0.08297		0.913333	-0.04435
				0.9152	0.005722		0.919783	0.626087		0.91875	-0.0844		0.92	-0.04292
				0.921867	0.007153		0.92645	0.62561		0.925417	-0.08535		0.926667	-0.04196
				0.928533	0.00906		0.933117	0.625134		0.932083	-0.08726		0.933333	-0.04005
				0.9352	0.01049		0.939783	0.625134		0.93875	-0.08917		0.94	-0.0391
				0.941867	0.010967		0.94645	0.626087		0.945417	-0.0906		0.946667	-0.03958
				0.948533	0.011444		0.953117	0.627518		0.952083	-0.09108		0.953333	-0.04196
				0.9552	0.010967		0.959783	0.629425		0.95875	-0.09108		0.96	-0.04387
				0.961867	0.010014		0.96645	0.631809		0.965417	-0.09251		0.966667	-0.04578
				0.968533	0.00906		0.973117	0.633717		0.972083	-0.09394		0.973333	-0.04768
				0.9752	0.008583		0.979783	0.63467		0.97875	-0.09537		0.98	-0.05102
				0.981867	0.00906		0.98645	0.636101		0.985417	-0.09489		0.986667	-0.05388
				0.988533	0.009537		0.993117	0.637531		0.992083	-0.09441		0.993333	-0.05531
				0.9952	0.01049		0.999783	0.639439		0.99875	-0.09441		1	-0.05579
				1.00187	0.010967		1.00645	0.641346		1.00542	-0.09537		1.00667	-0.05531
				1.00853	0.011921		1.01312	0.6423		1.01208	-0.09632		1.01333	-0.05436
				1.0152	0.010967		1.01978	0.642776		1.01875	-0.09632		1.02	-0.05245
				1.02187	0.00906		1.02645	0.644684		1.02542	-0.09632		1.02667	-0.04864
				1.02853	0.006199		1.03312	0.646591		1.03208	-0.0968		1.03333	-0.04578
				1.0352	0.002861		1.03978	0.648975		1.03875	-0.09537		1.04	-0.04435
				1.04187	0.000477		1.04645	0.650883		1.04542	-0.09203		1.04667	-0.04435
				1.04853	-0.00238		1.05312	0.651836		1.05208	-0.08869		1.05333	-0.04482
				1.0552	-0.00477		1.05978	0.651836		1.05875	-0.08631		1.06	-0.04578
				1.06187	-0.0062		1.06645	0.650883		1.06542	-0.08583		1.06667	-0.04721
				1.06853	-0.00668		1.07312	0.648975		1.07208	-0.08678		1.07333	-0.04864
				1.0752	-0.0062		1.07978	0.645638		1.07875	-0.08869		1.08	-0.04864
				1.08187	-0.0062		1.08645	0.643253		1.08542	-0.09108		1.08667	-0.04721
				1.08853	-0.00572		1.09312	0.640869		1.09208	-0.09298		1.09333	-0.04625
				1.0952	-0.00525		1.09978	0.639915		1.09875	-0.09441		1.1	-0.04625
				1.10187	-0.00572		1.10645	0.640869		1.10542	-0.09537		1.10667	-0.04816
				1.10853	-0.00763		1.11312	0.641823		1.11208	-0.09584		1.11333	-0.05054
				1.1152	-0.00954		1.11978	0.642776		1.11875	-0.09537		1.12	-0.05293
				1.12187	-0.01097		1.12645	0.643253		1.12542	-0.09441		1.12667	-0.05484
				1.12853	-0.01192		1.13312	0.645161		1.13208	-0.09346		1.13333	-0.05579
				1.1352	-0.01192		1.13978	0.647545		1.13875	-0.09203		1.14	-0.05674
				1.14187	-0.01192		1.14645	0.649452		1.14542	-0.09108		1.14667	-0.05627
				1.14853	-0.01144		1.15312	0.650883		1.15208	-0.09012		1.15333	-0.05531
				1.1552	-0.01097		1.15978	0.65279		1.15875	-0.09012		1.16	-0.05436
				1.16187	-0.01097		1.16645	0.653744		1.16542	-0.08965		1.16667	-0.05198
				1.16853	-0.01097		1.17312	0.653744		1.17208	-0.08821		1.17333	-0.04959
				1.1752	-0.01049		1.17978	0.653744		1.17875	-0.08535		1.18	-0.04673
				1.18187	-0.00906		1.18645	0.654697		1.18542	-0.08297		1.18667	-0.0453
				1.18853	-0.0062		1.19312	0.656128		1.19208	-0.08106		1.19333	-0.0453
				1.1952	-0.00381		1.19978	0.658512		1.19875	-0.07963		1.2	-0.04721
				1.20187	-0.00191		1.20645	0.662327		1.20542	-0.07915		1.20667	-0.04959
				1.20853	-0.00095		1.21312	0.666618		1.21208	-0.08059		1.21333	-0.05198
				1.2152	0		1.21978	0.669479		1.21875	-0.08345		1.22	-0.05198
				1.22187	0.000954		1.22645	0.671387		1.22542	-0.08488		1.22667	-0.05007
				1.22853	0.000954		1.23312	0.673294		1.23208	-0.08392		1.23333	-0.04768
				1.2352	0.000477		1.23978	0.676155		1.23875	-0.08154		1.24	-0.04435
				1.24187	0.000954		1.24645	0.679493		1.24542	-0.0782		1.24667	-0.04101
				1.24853	0.003338		1.25312	0.683308		1.25208	-0.07248		1.25333	-0.03624
				1.2552	0.009537		1.25978	0.688553		1.25875	-0.06247		1.26	-0.03004
				1.26187	0.021458		1.26645	0.693798		1.26542	-0.04911		1.26667	-0.02098
				1.26853	0.039577		1.27312	0.699997		1.27208	-0.03242		1.27333	-0.00858
				1.2752	0.062466		1.27978	0.706673		1.27875	-0.01287		1.28	0.005245
				1.28187	0.088215		1.28645	0.712395		1.28542	0.009537		1.28667	0.018597
				1.28853	0.114441		1.29312	0.71764		1.29208	0.030518		1.29333	0.029564
				1.2952	0.137329		1.29978	0.720978		1.29875	0.045776		1.3	0.035763
				1.30187	0.154018		1.30645	0.722408		1.30542	0.052929		1.30667	0.034809
				1.30853	0.162125		1.31312	0.71907		1.31208	0.051975		1.31333	0.02718
				1.3152	0.161648		1.31978	0.709534		1.31875	0.043392		1.32	0.015736
				1.32187	0.155926		1.32645	0.703335		1.32542	0.033855		1.32667	0.008583
				1.32853	0.157356		1.33312	0.736237		1.33208	0.053406		1.33333	0.033379
				1.3352	0.195026		1.33978	0.847816		1.33875	0.139713		1.34	0.127316
				1.34187	0.301838		1.34645	1.04427		1.34542	0.305653		1.34667	0.30756
				1.34853	0.49448		1.35312	1.30081		1.35208	0.538826		1.35333	0.576496
				1.3552	0.775337		1.35978	1.60456		1.35875	0.833988		1.36	0.9408
				1.36187	1.14203		1.36645	1.96266		1.36542	1.19305		1.36667	1.38998
				1.36853	1.53828		1.37312	2.28691		1.37208	1.51873		1.37333	1.75667
				1.3752	1.75762		1.37978	2.32315		1.37875	1.55306		1.38	1.71137
				1.38187	1.50299		1.38645	1.77765		1.38542	1.00946		1.38667	0.947952
				1.38853	0.551701		1.39312	0.504017		1.39208	-0.25749		1.39333	-0.62656
				1.3952	-1.1034		1.39978	-1.39284		1.39875	-2.14958		1.4	-2.82383
				1.40187	-3.23772		1.40645	-3.61347		1.40542	-4.36783		1.40667	-5.25284
				1.40853	-5.4493		1.41312	-5.71585		1.41208	-6.4621		1.41333	-7.37858
				1.4152	-7.21693		1.41978	-7.18212		1.41875	-7.91121		1.42	-8.65221
				1.42187	-8.07238		1.42645	-7.60508		1.42542	-8.31985		1.42667	-8.72755
				1.42853	-7.79772		1.43312	-6.88076		1.43208	-7.59315		1.43333	-7.61938
				1.4352	-6.51789		1.43978	-5.26428		1.43875	-5.98812		1.44	-5.70536
				1.44187	-4.63533		1.44645	-3.23725		1.44542	-3.97921		1.44667	-3.53336
				1.44853	-2.64454		1.45312	-1.29366		1.45208	-2.05088		1.45333	-1.58787
				1.4552	-0.94843		1.45978	0.230789		1.45875	-0.53596		1.46	-0.1483
				1.46187	0.238419		1.46645	1.21021		1.46542	0.440598		1.46667	0.725269
				1.46853	0.902176		1.47312	1.70803		1.47208	0.937939		1.47333	1.13583
				1.4752	1.17254		1.47978	1.88589		1.47875	1.1158		1.48	1.2579
				1.48187	1.22309		1.48645	1.90496		1.48542	1.1344		1.48667	1.24836
				1.48853	1.18685		1.49312	1.86491		1.49208	1.09386		1.49333	1.18923
				1.4952	1.122		1.49978	1.79815		1.49875	1.02663		1.5	1.1034
				1.50187	1.04141		1.50645	1.71185		1.50542	0.941753		1.50667	0.997543
				1.50853	0.947952		1.51312	1.61123		1.51208	0.842571		1.51333	0.87738
				1.5152	0.84734		1.51978	1.50347		1.51875	0.73576		1.52	0.752449
				1.52187	0.745773		1.52645	1.39666		1.52542	0.631332		1.52667	0.632286
				1.52853	0.651836		1.53312	1.29795		1.53208	0.535965		1.53333	0.526428
				1.5352	0.56982		1.53978	1.21355		1.53875	0.453949		1.54	0.43869
				1.54187	0.502586		1.54645	1.14393		1.54542	0.386238		1.54667	0.370502
				1.54853	0.451088		1.55312	1.08862		1.55208	0.333309		1.55333	0.319958
				1.5552	0.414848		1.55978	1.0457		1.55875	0.294685		1.56	0.283718
				1.56187	0.390053		1.56645	1.01662		1.56542	0.267506		1.56667	0.26083
				1.56853	0.374317		1.57312	0.998974		1.57208	0.250816		1.57333	0.247478
				1.5752	0.362873		1.57978	0.990391		1.57875	0.24128		1.58	0.240326
				1.58187	0.354767		1.58645	0.988007		1.58542	0.237465		1.58667	0.235558
				1.58853	0.347614		1.59312	0.990391		1.59208	0.236034		1.59333	0.23222
				1.5952	0.340939		1.59978	0.996113		1.59875	0.235558		1.6	0.228882
				1.60187	0.333309		1.60645	1.00184		1.60542	0.234604		1.60667	0.22316
				1.60853	0.324249		1.61312	1.00517		1.61208	0.230789		1.61333	0.21553
				1.6152	0.313282		1.61978	1.00565		1.61875	0.223637		1.62	0.206947
				1.62187	0.301838		1.62645	1.00422		1.62542	0.213146		1.62667	0.197887
				1.62853	0.288486		1.63312	1.0004		1.63208	0.201225		1.63333	0.187397
				1.6352	0.274658		1.63978	0.994205		1.63875	0.188351		1.64	0.175476
				1.64187	0.261307		1.64645	0.985622		1.64542	0.174999		1.64667	0.164032
				1.64853	0.250816		1.65312	0.977039		1.65208	0.162125		1.65333	0.152111
				1.6552	0.24271		1.65978	0.967503		1.65875	0.151634		1.66	0.14019
				1.66187	0.236511		1.66645	0.957012		1.66542	0.143051		1.66667	0.130653
				1.66853	0.231743		1.67312	0.946522		1.67208	0.136852		1.67333	0.124454
				1.6752	0.228882		1.67978	0.935555		1.67875	0.132084		1.68	0.122547
				1.68187	0.227928		1.68645	0.926018		1.68542	0.1297		1.68667	0.123501
				1.68853	0.228405		1.69312	0.917435		1.69208	0.129223		1.69333	0.127316
				1.6952	0.231743		1.69978	0.911713		1.69875	0.130653		1.7	0.133991
				1.70187	0.238895		1.70645	0.907421		1.70542	0.133038		1.70667	0.143528
				1.70853	0.249863		1.71312	0.905037		1.71208	0.136852		1.71333	0.159264
				1.7152	0.267982		1.71978	0.905037		1.71875	0.145435		1.72	0.184059
				1.72187	0.300884		1.72645	0.906944		1.72542	0.161171		1.72667	0.226498
				1.72853	0.357151		1.73312	0.908375		1.73208	0.190258		1.73333	0.29707
				1.7352	0.450611		1.73978	0.908852		1.73875	0.238419		1.74	0.408649
				1.74187	0.596046		1.74645	0.911713		1.74542	0.317097		1.74667	0.574112
				1.74853	0.807285		1.75312	0.919342		1.75208	0.43726		1.75333	0.805378
				1.7552	1.091		1.75978	0.932693		1.75875	0.610828		1.76	1.10531
				1.76187	1.44577		1.76645	0.955105		1.76542	0.84734		1.76667	1.46961
				1.76853	1.85728		1.77312	0.993252		1.77208	1.15013		1.77333	1.8816
				1.7752	2.30217		1.77978	1.05476		1.77875	1.51396		1.78	2.31504
				1.78187	2.74706		1.78645	1.14822		1.78542	1.92261		1.78667	2.73752
				1.78853	3.15476		1.79312	1.28269		1.79208	2.3489		1.79333	3.11327
				1.7952	3.49235		1.79978	1.46627		1.79875	2.76089		1.8	3.41082
				1.80187	3.73268		1.80645	1.70517		1.80542	3.12519		1.80667	3.6087
				1.80853	3.86286		1.81312	2.00033		1.81208	3.41368		1.81333	3.69787
				1.8152	3.87907		1.81978	2.34318		1.81875	3.6068		1.82	3.67928
				1.82187	3.79133		1.82645	2.71606		1.82542	3.69501		1.82667	3.56483
				1.82853	3.61919		1.83312	3.09515		1.83208	3.68023		1.83333	3.3741
				1.8352	3.38364		1.83978	3.45373		1.83875	3.57532		1.84	3.13139
				1.84187	3.1085		1.84645	3.76415		1.84542	3.39889		1.84667	2.85816
				1.84853	2.81429		1.85312	4.00352		1.85208	3.17001		1.85333	2.57301
				1.8552	2.51913		1.85978	4.15754		1.85875	2.90823		1.86	2.28977
				1.86187	2.23541		1.86645	4.22192		1.86542	2.63262		1.86667	2.01988
				1.86853	1.96934		1.87312	4.20237		1.87208	2.35701		1.87333	1.77002
				1.8752	1.7252		1.87978	4.10986		1.87875	2.09093		1.88	1.54304
				1.88187	1.50442		1.88645	3.95918		1.88542	1.84202		1.88667	1.33801
				1.88853	1.30796		1.89312	3.76749		1.89208	1.61314		1.89333	1.15585
				1.8952	1.13583		1.89978	3.54958		1.89875	1.40667		1.9	0.997066
				1.90187	0.987053		1.90645	3.31783		1.90542	1.22166		1.90667	0.858784
				1.90853	0.859261		1.91312	3.08228		1.91208	1.05619		1.91333	0.739574
				1.9152	0.750065		1.91978	2.85053		1.91875	0.910759		1.92	0.636578
				1.92187	0.657558		1.92645	2.62976		1.92542	0.783443		1.92667	0.55027
				1.92853	0.581264		1.93312	2.42233		1.93208	0.674248		1.93333	0.479221
				1.9352	0.521183		1.93978	2.23112		1.93875	0.581264		1.94	0.425816
				1.94187	0.481606		1.94645	2.0566		1.94542	0.504494		1.94667	0.396252
				1.94853	0.47493		1.95312	1.89924		1.95208	0.444889		1.95333	0.402451
				1.9552	0.520229		1.95978	1.76001		1.95875	0.403881		1.96	0.462055
				1.96187	0.644207		1.96645	1.63698		1.96542	0.383377		1.96667	0.600815
				1.96853	0.879288		1.97312	1.52922		1.97208	0.390053		1.97333	0.849247
				1.9752	1.26171		1.97978	1.43576		1.97875	0.432491		1.98	1.23739
				1.98187	1.82581		1.98645	1.35756		1.98542	0.52309		1.98667	1.79291
				1.98853	2.59447		1.99312	1.29414		1.99208	0.67234		1.99333	2.53391
				1.9952	3.57676		1.99978	1.24455		1.99875	0.890732		2	3.46756
				2.00187	4.76551		2.00645	1.2083		2.00542	1.18732		2.00667	4.5886
				2.00853	6.14357		2.01312	1.18589		2.01208	1.57166		2.01333	5.88846
				2.0152	7.70187		2.01978	1.1754		2.01875	2.05565		2.02	7.3719
				2.02187	9.46474		2.02645	1.17588		2.02542	2.66266		2.02667	9.08709
				2.02853	11.5562		2.03312	1.18446		2.03208	3.45087		2.03333	11.2114
				2.0352	14.3461		2.03978	1.20115		2.03875	4.57573		2.04	14.2388
				2.04187	18.7349		2.04645	1.22833		2.04542	6.43015		2.04667	19.2909
				2.04853	26.4731		2.05312	1.27745		2.05208	9.84621		2.05333	28.3284
				2.0552	40.029		2.05978	1.3876		2.05875	16.2153		2.06	43.7589
				2.06187	61.5583		2.06645	1.6613		2.06542	27.2632		2.06667	67.2307
				2.06853	91.3401		2.07312	2.32172		2.07208	44.405		2.07333	98.2695
				2.0752	126.891		2.07978	3.76511		2.07875	67.9831		2.08	133.826
				2.08187	163.445		2.08645	6.58941		2.08542	96.806		2.08667	168.992
				2.08853	195.265		2.09312	11.5686		2.09208	128.178		2.09333	198.256
				2.0952	217.006		2.09978	19.5541		2.09875	158.327		2.1	216.779
				2.10187	225.044		2.10645	31.2982		2.10542	183.187		2.10667	221.708
				2.10853	218.684		2.11312	47.2145		2.11208	199.411		2.11333	213.151
				2.1152	200.444		2.11978	67.1406		2.11875	205.26		2.12	194.066
				2.12187	174.915		2.12645	90.1828		2.12542	200.929		2.12667	168.912
				2.12853	146.882		2.13312	114.719		2.13208	188.193		2.13333	141.973
				2.1352	119.942		2.13978	138.588		2.13875	169.692		2.14	116.334
				2.14187	96.1275		2.14645	159.434		2.14542	148.204		2.14667	93.7061
				2.14853	76.1995		2.15312	175.134		2.15208	126.124		2.15333	74.7199
				2.1552	60.1191		2.15978	184.194		2.15875	105.199		2.16	59.3171
				2.16187	47.4386		2.16645	185.999		2.16542	86.4758		2.16667	47.0867
				2.16853	37.5671		2.17312	180.881		2.17208	70.4098		2.17333	37.4947
				2.1752	29.9244		2.17978	169.964		2.17875	57.0335		2.18	30.0126
				2.18187	24.0087		2.18645	154.875		2.18542	46.1245		2.18667	24.1799
				2.18853	19.4173		2.19312	137.4		2.19208	37.3421		2.19333	19.6204
				2.1952	15.8334		2.19978	119.177		2.19875	30.3221		2.2	16.0403
				2.20187	13.0148		2.20645	101.506		2.20542	24.7297		2.20667	13.2155
				2.20853	10.7822		2.21312	85.2671		2.21208	20.2766		2.21333	10.9744
				2.2152	9.00316		2.21978	70.9367		2.21875	16.7236		2.22	9.18531
				2.22187	7.57599		2.22645	58.6658		2.22542	13.8783		2.22667	7.74717
				2.22853	6.42395		2.23312	48.3866		2.23208	11.5938		2.23333	6.58608
				2.2352	5.48887		2.23978	39.9084		2.23875	9.75418		2.24	5.64432
				2.24187	4.72784		2.24645	32.9857		2.24542	8.26549		2.24667	4.87614
				2.24853	4.10557		2.25312	27.3633		2.25208	7.05528		2.25333	4.2448
				2.2552	3.59345		2.25978	22.8076		2.25875	6.06632		2.26	3.72219
				2.26187	3.16954		2.26645	19.1164		2.26542	5.25618		2.26667	3.28731
				2.26853	2.81715		2.27312	16.1233		2.27208	4.5886		2.27333	2.92492
				2.2752	2.52199		2.27978	13.6919		2.27875	4.03357		2.28	2.61974
				2.28187	2.27117		2.28645	11.7111		2.28542	3.56865		2.28667	2.35987
				2.28853	2.05612		2.29312	10.0942		2.29208	3.17812		2.29333	2.13718
				2.2952	1.87254		2.29978	8.76999		2.29875	2.84863		2.3	1.94645
				2.30187	1.71328		2.30645	7.68185		2.30542	2.56681		2.30667	1.78146
				2.30853	1.57404		2.31312	6.78301		2.31208	2.32506		2.31333	1.63746
				2.3152	1.45245		2.31978	6.03819		2.31875	2.11668		2.32	1.51014
				2.32187	1.34754		2.32645	5.41782		2.32542	1.93644		2.32667	1.39809
				2.32853	1.25647		2.33312	4.89807		2.33208	1.77956		2.33333	1.29843
				2.3352	1.17445		2.33978	4.46033		2.33875	1.6408		2.34	1.20974
				2.34187	1.10006		2.34645	4.08936		2.34542	1.5192		2.34667	1.13058
				2.34853	1.03331		2.35312	3.77321		2.35208	1.41144		2.35333	1.06049
				2.3552	0.971794		2.35978	3.50189		2.35875	1.31464		2.36	0.998974
				2.36187	0.914097		2.36645	3.26824		2.36542	1.22881		2.36667	0.943184
				2.36853	0.861168		2.37312	3.06654		2.37208	1.15251		2.37333	0.890732
				2.3752	0.813961		2.37978	2.89202		2.37875	1.08433		2.38	0.842094
				2.38187	0.772953		2.38645	2.74086		2.38542	1.02138		2.38667	0.796795
				2.38853	0.73576		2.39312	2.60687		2.39208	0.962734		2.39333	0.75388
				2.3952	0.700951		2.39978	2.48814		2.39875	0.908852		2.4	0.712872
				2.40187	0.669003		2.40645	2.38132		2.40542	0.860214		2.40667	0.674725
				2.40853	0.638962		2.41312	2.28596		2.41208	0.815868		2.41333	0.639915
				2.4152	0.609875		2.41978	2.2006		2.41875	0.775337		2.42	0.608921
				2.42187	0.581264		2.42645	2.12288		2.42542	0.738621		2.42667	0.580311
				2.42853	0.553608		2.43312	2.05278		2.43208	0.704288		2.43333	0.553608
				2.4352	0.527382		2.43978	1.98937		2.43875	0.671387		2.44	0.528812
				2.44187	0.502586		2.44645	1.93167		2.44542	0.639915		2.44667	0.504971
				2.44853	0.480175		2.45312	1.87826		2.45208	0.610352		2.45333	0.481129
				2.4552	0.461102		2.45978	1.82819		2.45875	0.582695		2.46	0.457287
				2.46187	0.445366		2.46645	1.78146		2.46542	0.556469		2.46667	0.434875
				2.46853	0.432968		2.47312	1.73807		2.47208	0.532627		2.47333	0.414848
				2.4752	0.422478		2.47978	1.69849		2.47875	0.511646		2.48	0.397682
				2.48187	0.414371		2.48645	1.66178		2.48542	0.491142		2.48667	0.383377
				2.48853	0.406742		2.49312	1.62792		2.49208	0.470638		2.49333	0.371933
				2.4952	0.399113		2.49978	1.59645		2.49875	0.451565		2.5	0.362396
				2.50187	0.390053		2.50645	1.56832		2.50542	0.434399		2.50667	0.35429
				2.50853	0.380516		2.51312	1.54209		2.51208	0.419617		2.51333	0.346184
				2.5152	0.371933		2.51978	1.51873		2.51875	0.406265		2.52	0.336647
				2.52187	0.363827		2.52645	1.49584		2.52542	0.394821		2.52667	0.32568
				2.52853	0.355721		2.53312	1.47343		2.53208	0.385284		2.53333	0.312805
				2.5352	0.345707		2.53978	1.45054		2.53875	0.378132		2.54	0.299454
				2.54187	0.335217		2.54645	1.42908		2.54542	0.370502		2.54667	0.285625
				2.54853	0.325203		2.55312	1.41001		2.55208	0.361919		2.55333	0.272751
				2.5552	0.314713		2.55978	1.39237		2.55875	0.353336		2.56	0.261307
				2.56187	0.303268		2.56645	1.37711		2.56542	0.34523		2.56667	0.252247
				2.56853	0.291824		2.57312	1.36375		2.57208	0.33617		2.57333	0.245094
				2.5752	0.280857		2.57978	1.35183		2.57875	0.326157		2.58	0.239372
				2.58187	0.27132		2.58645	1.34182		2.58542	0.317097		2.58667	0.233173
				2.58853	0.26226		2.59312	1.33276		2.59208	0.308037		2.59333	0.225067
				2.5952	0.252724		2.59978	1.3237		2.59875	0.298977		2.6	0.216007
				2.60187	0.243664		2.60645	1.31321		2.60542	0.28944		2.60667	0.205994
				2.60853	0.234604		2.61312	1.30272		2.61208	0.27895		2.61333	0.196457
				2.6152	0.226974		2.61978	1.29271		2.61875	0.267029		2.62	0.18692
				2.62187	0.218391		2.62645	1.28222		2.62542	0.254154		2.62667	0.178337
				2.62853	0.209808		2.63312	1.27077		2.63208	0.242233		2.63333	0.171185
				2.6352	0.201702		2.63978	1.26076		2.63875	0.232697		2.64	0.164986
				2.64187	0.195503		2.64645	1.25217		2.64542	0.226498		2.64667	0.160694
				2.64853	0.190258		2.65312	1.24455		2.65208	0.221729		2.65333	0.156879
				2.6552	0.185966		2.65978	1.23692		2.65875	0.218868		2.66	0.152588
				2.66187	0.182152		2.66645	1.23072		2.66542	0.216007		2.66667	0.148296
				2.66853	0.179768		2.67312	1.22452		2.67208	0.213623		2.67333	0.143528
				2.6752	0.177383		2.67978	1.21784		2.67875	0.209808		2.68	0.13876
				2.68187	0.174046		2.68645	1.20974		2.68542	0.20504		2.68667	0.133514
				2.68853	0.169277		2.69312	1.20211		2.69208	0.199318		2.69333	0.128746
				2.6952	0.164509		2.69978	1.19638		2.69875	0.193596		2.7	0.124931
				2.70187	0.160217		2.70645	1.19066		2.70542	0.188828		2.70667	0.123024
				2.70853	0.155449		2.71312	1.18494		2.71208	0.185013		2.71333	0.121117
				2.7152	0.151157		2.71978	1.17969		2.71875	0.181198		2.72	0.119209
				2.72187	0.148296		2.72645	1.17588		2.72542	0.177383		2.72667	0.117302
				2.72853	0.14782		2.73312	1.17111		2.73208	0.173092		2.73333	0.113964
				2.7352	0.148773		2.73978	1.16444		2.73875	0.168324		2.74	0.110149
				2.74187	0.149727		2.74645	1.15824		2.74542	0.162601		2.74667	0.105381
				2.74853	0.148296		2.75312	1.15204		2.75208	0.155926		2.75333	0.101089
				2.7552	0.144482		2.75978	1.14584		2.75875	0.14925		2.76	0.097752
				2.76187	0.14019		2.76645	1.13916		2.76542	0.143051		2.76667	0.096321
				2.76853	0.135899		2.77312	1.13392		2.77208	0.13876		2.77333	0.096798
				2.7752	0.13113		2.77978	1.1301		2.77875	0.136852		2.78	0.098705
				2.78187	0.126839		2.78645	1.12772		2.78542	0.136852		2.78667	0.101089
				2.78853	0.124454		2.79312	1.12629		2.79208	0.136852		2.79333	0.103951
				2.7952	0.124931		2.79978	1.12629		2.79875	0.137329		2.8	0.105858
				2.80187	0.125885		2.80645	1.12772		2.80542	0.136375		2.80667	0.104904
				2.80853	0.125408		2.81312	1.12915		2.81208	0.134468		2.81333	0.102043
				2.8152	0.123978		2.81978	1.1282		2.81875	0.131607		2.82	0.097275
				2.82187	0.122547		2.82645	1.12581		2.82542	0.128269		2.82667	0.092506
				2.82853	0.12064		2.83312	1.12295		2.83208	0.126362		2.83333	0.087738
				2.8352	0.118256		2.83978	1.11961		2.83875	0.125885		2.84	0.083447
				2.84187	0.115395		2.84645	1.11723		2.84542	0.127316		2.84667	0.080585
				2.84853	0.11301		2.85312	1.1158		2.85208	0.128746		2.85333	0.077724
				2.8552	0.110626		2.85978	1.11628		2.85875	0.129223		2.86	0.074863
				2.86187	0.108719		2.86645	1.11675		2.86542	0.128269		2.86667	0.072002
				2.86853	0.108719		2.87312	1.11628		2.87208	0.127316		2.87333	0.069141
				2.8752	0.110149		2.87978	1.1158		2.87875	0.125885		2.88	0.067711
				2.88187	0.11301		2.88645	1.11485		2.88542	0.123024		2.88667	0.068188
				2.88853	0.117302		2.89312	1.11294		2.89208	0.120163		2.89333	0.072002
				2.8952	0.124454		2.89978	1.11151		2.89875	0.119209		2.9	0.079155
				2.90187	0.133991		2.90645	1.11055		2.90542	0.120163		2.90667	0.089169
				2.90853	0.141621		2.91312	1.11151		2.91208	0.123501		2.91333	0.099182
				2.9152	0.139236		2.91978	1.11246		2.91875	0.129223		2.92	0.101089
				2.92187	0.123024		2.92645	1.11389		2.92542	0.136375		2.92667	0.089645
				2.92853	0.096321		2.93312	1.11485		2.93208	0.136375		2.93333	0.065327
				2.9352	0.068665		2.93978	1.11532		2.93875	0.123501		2.94	0.030994
				2.94187	0.038624		2.94645	1.11389		2.94542	0.099182		2.94667	-0.0248
				2.94853	-0.01049		2.95312	1.11246		2.95208	0.072479		2.95333	-0.11969
				2.9552	-0.08774		2.95978	1.11246		2.95875	0.049591		2.96	-0.2408
				2.96187	-0.17262		2.96645	1.11342		2.96542	0.022888		2.96667	-0.33951
				2.96853	-0.22888		2.97312	1.11723		2.97208	-0.02766		2.97333	-0.37432
				2.9752	-0.23699		2.97978	1.11914		2.97875	-0.10681		2.98	-0.33998
				2.98187	-0.1955		2.98645	1.1158		2.98542	-0.19121		2.98667	-0.24033
				2.98853	-0.09966		2.99312	1.10531		2.99208	-0.24271		2.99333	-0.07439
				2.9952	0.054836		2.99978	1.09243		2.99875	-0.24223		3	0.14019
				3.00187	0.243664		3.00645	1.08147		3.00542	-0.18549		3.00667	0.354767
				3.00853	0.420094		3.01312	1.05476		3.01208	-0.06485		3.01333	0.522137
				3.0152	0.551701		3.01978	0.985146		3.01875	0.116825		3.02	0.630379
				3.02187	0.635147		3.02645	0.87738		3.02542	0.323296		3.02667	0.692844
				3.02853	0.682831		3.03312	0.771999		3.03208	0.502586		3.03333	0.726223
				3.0352	0.706673		3.03978	0.716209		3.03875	0.624657		3.04	0.741005
				3.04187	0.714302		3.04645	0.722885		3.04542	0.694275		3.04667	0.74482
				3.04853	0.712395		3.05312	0.79298		3.05208	0.730038		3.05333	0.741005
				3.0552	0.706196		3.05978	0.936508		3.05875	0.747204		3.06	0.733376
				3.06187	0.69952		3.06645	1.1425		3.06542	0.753403		3.06667	0.723362
				3.06853	0.694275		3.07312	1.36185		3.07208	0.75388		3.07333	0.713825
				3.0752	0.689983		3.07978	1.53685		3.07875	0.750542		3.08	0.706673
				3.08187	0.686646		3.08645	1.6489		3.08542	0.745773		3.08667	0.702381
				3.08853	0.681877		3.09312	1.71137		3.09208	0.739098		3.09333	0.698566
				3.0952	0.674725		3.09978	1.74427		3.09875	0.730991		3.1	0.694752
				3.10187	0.666142		3.10645	1.76048		3.10542	0.722408		3.10667	0.689507
				3.10853	0.657082		3.11312	1.76668		3.11208	0.714302		3.11333	0.683784
				3.1152	0.648499		3.11978	1.76764		3.11875	0.709057		3.12	0.676632
				3.12187	0.640392		3.12645	1.76525		3.12542	0.705242		3.12667	0.667572
				3.12853	0.633717		3.13312	1.76239		3.13208	0.701904		3.13333	0.658035
				3.1352	0.628948		3.13978	1.75857		3.13875	0.699043		3.14	0.649452
				3.14187	0.62561		3.14645	1.75381		3.14542	0.696182		3.14667	0.642776
				3.14853	0.622749		3.15312	1.74809		3.15208	0.693321		3.15333	0.637054
				3.1552	0.620365		3.15978	1.74236		3.15875	0.688076		3.16	0.630856
				3.16187	0.617981		3.16645	1.73712		3.16542	0.681877		3.16667	0.625134
				3.16853	0.61512		3.17312	1.73235		3.17208	0.676155		3.17333	0.618458
				3.1752	0.611782		3.17978	1.72806		3.17875	0.67091		3.18	0.611305
				3.18187	0.607491		3.18645	1.72329		3.18542	0.665665		3.18667	0.603676
				3.18853	0.601292		3.19312	1.71948		3.19208	0.660896		3.19333	0.597477
				3.1952	0.594616		3.19978	1.71661		3.19875	0.657082		3.2	0.591278
				3.20187	0.588894		3.20645	1.71328		3.20542	0.653744		3.20667	0.586987
				3.20853	0.585079		3.21312	1.70898		3.21208	0.648975		3.21333	0.583649
				3.2152	0.582218		3.21978	1.70422		3.21875	0.64373		3.22	0.582218
				3.22187	0.57888		3.22645	1.69992		3.22542	0.639439		3.22667	0.580788
				3.22853	0.574589		3.23312	1.69611		3.23208	0.63467		3.23333	0.576973
				3.2352	0.568867		3.23978	1.69134		3.23875	0.629902		3.24	0.571251
				3.24187	0.562191		3.24645	1.68657		3.24542	0.625134		3.24667	0.562668
				3.24853	0.555515		3.25312	1.68276		3.25208	0.621319		3.25333	0.552654
				3.2552	0.54884		3.25978	1.67894		3.25875	0.617981		3.26	0.541687
				3.26187	0.543594		3.26645	1.67513		3.26542	0.614166		3.26667	0.533104
				3.26853	0.539303		3.27312	1.67036		3.27208	0.609875		3.27333	0.526428
				3.2752	0.535965		3.27978	1.66511		3.27875	0.605583		3.28	0.52166
				3.28187	0.531197		3.28645	1.66082		3.28542	0.599861		3.28667	0.518799
				3.28853	0.524044		3.29312	1.65796		3.29208	0.592232		3.29333	0.516891
				3.2952	0.515461		3.29978	1.65558		3.29875	0.583172		3.3	0.515461
				3.30187	0.506401		3.30645	1.65272		3.30542	0.572205		3.30667	0.511646
				3.30853	0.496387		3.31312	1.64938		3.31208	0.561237		3.31333	0.505924
				3.3152	0.486374		3.31978	1.64556		3.31875	0.551701		3.32	0.499249
				3.32187	0.477314		3.32645	1.6408		3.32542	0.543118		3.32667	0.493526
				3.32853	0.471115		3.33312	1.6346		3.33208	0.536442		3.33333	0.487804
				3.3352	0.4673		3.33978	1.62935		3.33875	0.53072		3.34	0.482082
				3.34187	0.463963		3.34645	1.62411		3.34542	0.526428		3.34667	0.476837
				3.34853	0.461102		3.35312	1.61838		3.35208	0.52309		3.35333	0.472546
				3.3552	0.458241		3.35978	1.61219		3.35875	0.519276		3.36	0.467777
				3.36187	0.454426		3.36645	1.60503		3.36542	0.514507		3.36667	0.463486
				3.36853	0.450134		3.37312	1.59836		3.37208	0.509739		3.37333	0.458717
				3.3752	0.445366		3.37978	1.59311		3.37875	0.506878		3.38	0.453472
				3.38187	0.441074		3.38645	1.58977		3.38542	0.50354		3.38667	0.44775
				3.38853	0.437737		3.39312	1.58882		3.39208	0.498772		3.39333	0.442028
				3.3952	0.434875		3.39978	1.58882		3.39875	0.493526		3.4	0.437737
				3.40187	0.432968		3.40645	1.58739		3.40542	0.488758		3.40667	0.433922
				3.40853	0.431061		3.41312	1.58405		3.41208	0.483036		3.41333	0.430584
				3.4152	0.428677		3.41978	1.57738		3.41875	0.476837		3.42	0.426292
				3.42187	0.424385		3.42645	1.56975		3.42542	0.470161		3.42667	0.423431
				3.42853	0.419617		3.43312	1.56116		3.43208	0.464439		3.43333	0.421047
				3.4352	0.415325		3.43978	1.55449		3.43875	0.459194		3.44	0.419617
				3.44187	0.41008		3.44645	1.5502		3.44542	0.455856		3.44667	0.417233
				3.44853	0.404835		3.45312	1.54781		3.45208	0.453472		3.45333	0.414848
				3.4552	0.398159		3.45978	1.54591		3.45875	0.451565		3.46	0.413895
				3.46187	0.391006		3.46645	1.54352		3.46542	0.449181		3.46667	0.414848
				3.46853	0.385284		3.47312	1.54066		3.47208	0.445366		3.47333	0.417709
				3.4752	0.380039		3.47978	1.53589		3.47875	0.439167		3.48	0.422001
				3.48187	0.374794		3.48645	1.52922		3.48542	0.432491		3.48667	0.42963
				3.48853	0.369549		3.49312	1.52206		3.49208	0.425816		3.49333	0.440121
				3.4952	0.365257		3.49978	1.51539		3.49875	0.421047		3.5	0.454903
				3.50187	0.361919		3.50645	1.50824		3.50542	0.415802		3.50667	0.473976
				3.50853	0.358105		3.51312	1.50013		3.51208	0.411034		3.51333	0.495911
				3.5152	0.353336		3.51978	1.49393		3.51875	0.407696		3.52	0.52309
				3.52187	0.348568		3.52645	1.49107		3.52542	0.405788		3.52667	0.556469
				3.52853	0.344276		3.53312	1.48964		3.53208	0.401974		3.53333	0.597
				3.5352	0.340462		3.53978	1.48773		3.53875	0.395775		3.54	0.644207
				3.54187	0.336647		3.54645	1.48535		3.54542	0.39053		3.54667	0.699043
				3.54853	0.332832		3.55312	1.48344		3.55208	0.386715		3.55333	0.762939
				3.5552	0.328064		3.55978	1.48249		3.55875	0.3829		3.56	0.834465
				3.56187	0.322819		3.56645	1.4801		3.56542	0.378609		3.56667	0.915527
				3.56853	0.317574		3.57312	1.47533		3.57208	0.374794		3.57333	1.00613
				3.5752	0.312805		3.57978	1.47104		3.57875	0.371456		3.58	1.10674
				3.58187	0.307083		3.58645	1.46866		3.58542	0.368118		3.58667	1.21832
				3.58853	0.301838		3.59312	1.46627		3.59208	0.364304		3.59333	1.33991
				3.5952	0.298023		3.59978	1.46294		3.59875	0.360966		3.6	1.47438
				3.60187	0.29707		3.60645	1.45864		3.60542	0.359058		3.60667	1.62125
				3.60853	0.297546		3.61312	1.45578		3.61208	0.357628		3.61333	1.78051
				3.6152	0.297546		3.61978	1.4534		3.61875	0.356197		3.62	1.95074
				3.62187	0.298023		3.62645	1.45101		3.62542	0.353813		3.62667	2.13003
				3.62853	0.2985		3.63312	1.4472		3.63208	0.350952		3.63333	2.31838
				3.6352	0.2985		3.63978	1.44291		3.63875	0.347137		3.64	2.51484
				3.64187	0.29707		3.64645	1.44005		3.64542	0.342846		3.64667	2.71797
				3.64853	0.294685		3.65312	1.43719		3.65208	0.339031		3.65333	2.92301
				3.6552	0.293255		3.65978	1.43337		3.65875	0.33474		3.66	3.12996
				3.66187	0.291824		3.66645	1.43003		3.66542	0.331879		3.66667	3.33786
				3.66853	0.290871		3.67312	1.42765		3.67208	0.330448		3.67333	3.54719
				3.6752	0.291348		3.67978	1.42622		3.67875	0.329018		3.68	3.75271
				3.68187	0.290394		3.68645	1.42288		3.68542	0.326157		3.68667	3.95155
				3.68853	0.288486		3.69312	1.41954		3.69208	0.321865		3.69333	4.14228
				3.6952	0.285625		3.69978	1.41668		3.69875	0.318527		3.7	4.32491
				3.70187	0.282764		3.70645	1.41525		3.70542	0.316143		3.70667	4.49705
				3.70853	0.279903		3.71312	1.41239		3.71208	0.313282		3.71333	4.65488
				3.7152	0.277996		3.71978	1.40858		3.71875	0.309944		3.72	4.7965
				3.72187	0.277519		3.72645	1.40524		3.72542	0.308037		3.72667	4.92239
				3.72853	0.278473		3.73312	1.40142		3.73208	0.307083		3.73333	5.03254
				3.7352	0.281334		3.73978	1.39761		3.73875	0.306129		3.74	5.12695
				3.74187	0.284195		3.74645	1.39237		3.74542	0.304222		3.74667	5.20325
				3.74853	0.286102		3.75312	1.38855		3.75208	0.301838		3.75333	5.26142
				3.7552	0.285149		3.75978	1.38617		3.75875	0.300884		3.76	5.30434
				3.76187	0.282288		3.76645	1.38569		3.76542	0.300407		3.76667	5.33104
				3.76853	0.278473		3.77312	1.38664		3.77208	0.300884		3.77333	5.34105
				3.7752	0.273705		3.77978	1.38855		3.77875	0.302315		3.78	5.33199
				3.78187	0.268936		3.78645	1.39237		3.78542	0.304222		3.78667	5.30529
				3.78853	0.264645		3.79312	1.39809		3.79208	0.305653		3.79333	5.26333
				3.7952	0.262737		3.79978	1.40476		3.79875	0.304699		3.8	5.20468
				3.80187	0.26226		3.80645	1.41144		3.80542	0.302792		3.80667	5.12934
				3.80853	0.262737		3.81312	1.41859		3.81208	0.299931		3.81333	5.03922
				3.8152	0.264168		3.81978	1.43003		3.81875	0.2985		3.82	4.9386
				3.82187	0.264645		3.82645	1.44482		3.82542	0.29707		3.82667	4.82702
				3.82853	0.263691		3.83312	1.46341		3.83208	0.296593		3.83333	4.70305
				3.8352	0.259876		3.83978	1.4863		3.83875	0.298023		3.84	4.56762
				3.84187	0.254154		3.84645	1.51587		3.84542	0.300407		3.84667	4.42219
				3.84853	0.247002		3.85312	1.55258		3.85208	0.302315		3.85333	4.26722
				3.8552	0.238895		3.85978	1.59502		3.85875	0.302792		3.86	4.10366
				3.86187	0.230789		3.86645	1.6427		3.86542	0.303268		3.86667	3.93343
				3.86853	0.22459		3.87312	1.69754		3.87208	0.304222		3.87333	3.75843
				3.8752	0.219345		3.87978	1.76191		3.87875	0.305176		3.88	3.57962
				3.88187	0.214577		3.88645	1.83678		3.88542	0.305176		3.88667	3.39842
				3.88853	0.209808		3.89312	1.92308		3.89208	0.304222		3.89333	3.21484
				3.8952	0.20504		3.89978	2.02179		3.89875	0.302792		3.9	3.03078
				3.90187	0.200748		3.90645	2.13575		3.90542	0.300407		3.90667	2.84624
				3.90853	0.195026		3.91312	2.26641		3.91208	0.296593		3.91333	2.66266
				3.9152	0.187874		3.91978	2.4128		3.91875	0.293255		3.92	2.47908
				3.92187	0.180721		3.92645	2.5773		3.92542	0.291824		3.92667	2.2974
				3.92853	0.174999		3.93312	2.75946		3.93208	0.291348		3.93333	2.11954
				3.9352	0.171185		3.93978	2.95734		3.93875	0.291348		3.94	1.94645
				3.94187	0.16737		3.94645	3.17049		3.94542	0.291824		3.94667	1.7786
				3.94853	0.164032		3.95312	3.39842		3.95208	0.290871		3.95333	1.61743
				3.9552	0.161648		3.95978	3.64018		3.95875	0.287533		3.96	1.4658
				3.96187	0.158787		3.96645	3.89337		3.96542	0.281811		3.96667	1.32465
				3.96853	0.154018		3.97312	4.15754		3.97208	0.273705		3.97333	1.19257
				3.9752	0.147343		3.97978	4.4322		3.97875	0.265598		3.98	1.06955
				3.98187	0.139713		3.98645	4.71449		3.98542	0.257492		3.98667	0.956059
				3.98853	0.133038		3.99312	5.00155		3.99208	0.249863		3.99333	0.852108
				3.9952	0.128269		3.99978	5.28956		3.99875	0.243664		4	0.756264
				4.00187	0.125408		4.00645	5.57613		4.00542	0.238419		4.00667	0.667572
				4.00853	0.122547		4.01312	5.85747		4.01208	0.235558		4.01333	0.588417
				4.0152	0.118732		4.01978	6.13022		4.01875	0.23222		4.02	0.518322
				4.02187	0.114918		4.02645	6.39152		4.02542	0.226974		4.02667	0.455856
				4.02853	0.111103		4.03312	6.639		4.03208	0.220776		4.03333	0.400066
				4.0352	0.106335		4.03978	6.87075		4.03875	0.21553		4.04	0.351429
				4.04187	0.100613		4.04645	7.08294		4.04542	0.210285		4.04667	0.30899
				4.04853	0.095367		4.05312	7.27463		4.05208	0.204086		4.05333	0.271797
				4.0552	0.091553		4.05978	7.44343		4.05875	0.197411		4.06	0.238895
				4.06187	0.089169		4.06645	7.58839		4.06542	0.192165		4.06667	0.209808
				4.06853	0.087261		4.07312	7.70569		4.07208	0.188351		4.07333	0.185013
				4.0752	0.086308		4.07978	7.79438		4.07875	0.183582		4.08	0.164032
				4.08187	0.085831		4.08645	7.85494		4.08542	0.178814		4.08667	0.146389
				4.08853	0.085831		4.09312	7.88736		4.09208	0.174522		4.09333	0.132084
				4.0952	0.085354		4.09978	7.89118		4.09875	0.169754		4.1	0.119686
				4.10187	0.08297		4.10645	7.86638		4.10542	0.163078		4.10667	0.109673
				4.10853	0.081062		4.11312	7.81298		4.11208	0.155926		4.11333	0.100136
				4.1152	0.079632		4.11978	7.73287		4.11875	0.150204		4.12	0.09203
				4.12187	0.078678		4.12645	7.62701		4.12542	0.146389		4.12667	0.085354
				4.12853	0.078678		4.13312	7.49826		4.13208	0.144482		4.13333	0.080585
				4.1352	0.080585		4.13978	7.34758		4.13875	0.143051		4.14	0.07534
				4.14187	0.083923		4.14645	7.17783		4.14542	0.143528		4.14667	0.070095
				4.14853	0.087738		4.15312	6.98996		4.15208	0.144005		4.15333	0.06485
				4.1552	0.091553		4.15978	6.78682		4.15875	0.143051		4.16	0.060558
				4.16187	0.095367		4.16645	6.56986		4.16542	0.13876		4.16667	0.05722
				4.16853	0.100136		4.17312	6.3405		4.17208	0.131607		4.17333	0.053406
				4.1752	0.104427		4.17978	6.10018		4.17875	0.123501		4.18	0.050068
				4.18187	0.107765		4.18645	5.85318		4.18542	0.117302		4.18667	0.04673
				4.18853	0.111103		4.19312	5.60093		4.19208	0.11301		4.19333	0.043869
				4.1952	0.115395		4.19978	5.3463		4.19875	0.110149		4.2	0.041485
				4.20187	0.121117		4.20645	5.08976		4.20542	0.108719		4.20667	0.038147
				4.20853	0.126362		4.21312	4.8337		4.21208	0.109673		4.21333	0.034332
				4.2152	0.13113		4.21978	4.57859		4.21875	0.112534		4.22	0.031948
				4.22187	0.136852		4.22645	4.3273		4.22542	0.114441		4.22667	0.030518
				4.22853	0.141621		4.23312	4.08077		4.23208	0.113964		4.23333	0.030518
				4.2352	0.144482		4.23978	3.84188		4.23875	0.112057		4.24	0.030041
				4.24187	0.145912		4.24645	3.61061		4.24542	0.109673		4.24667	0.029087
				4.24853	0.145912		4.25312	3.38841		4.25208	0.106812		4.25333	0.026226
				4.2552	0.147343		4.25978	3.17717		4.25875	0.10252		4.26	0.022888
				4.26187	0.14782		4.26645	2.97832		4.26542	0.098228		4.26667	0.019073
				4.26853	0.14925		4.27312	2.79236		4.27208	0.094891		4.27333	0.015736
				4.2752	0.149727		4.27978	2.61927		4.27875	0.091553		4.28	0.012398
				4.28187	0.149727		4.28645	2.46		4.28542	0.088215		4.28667	0.010967
				4.28853	0.150681		4.29312	2.31504		4.29208	0.085831		4.29333	0.01049
				4.2952	0.150681		4.29978	2.18248		4.29875	0.0844		4.3	0.010967
				4.30187	0.150204		4.30645	2.06089		4.30542	0.0844		4.30667	0.010967
				4.30853	0.148296		4.31312	1.94979		4.31208	0.083447		4.31333	0.01049
				4.3152	0.146389		4.31978	1.85013		4.31875	0.081539		4.32	0.01049
				4.32187	0.143528		4.32645	1.76144		4.32542	0.079632		4.32667	0.00906
				4.32853	0.13876		4.33312	1.68085		4.33208	0.077724		4.33333	0.006676
				4.3352	0.132084		4.33978	1.60932		4.33875	0.076294		4.34	0.004292
				4.34187	0.124454		4.34645	1.54686		4.34542	0.074387		4.34667	0.002384
				4.34853	0.116348		4.35312	1.4925		4.35208	0.07391		4.35333	0.001431
				4.3552	0.106812		4.35978	1.44577		4.35875	0.074387		4.36	0.000954
				4.36187	0.097275		4.36645	1.40572		4.36542	0.074863		4.36667	0.001907
				4.36853	0.087261		4.37312	1.37377		4.37208	0.073433		4.37333	0.003338
				4.3752	0.077248		4.37978	1.34754		4.37875	0.071049		4.38	0.004768
				4.38187	0.067711		4.38645	1.32608		4.38542	0.067711		4.38667	0.005245
				4.38853	0.060081		4.39312	1.30653		4.39208	0.065327		4.39333	0.004292
				4.3952	0.052929		4.39978	1.28984		4.39875	0.063419		4.4	0.003338
				4.40187	0.045776		4.40645	1.27554		4.40542	0.061989		4.40667	0.002384
				4.40853	0.038624		4.41312	1.26171		4.41208	0.060081		4.41333	0.000954
				4.4152	0.031471		4.41978	1.25027		4.41875	0.059128		4.42	0
				4.42187	0.023842		4.42645	1.24073		4.42542	0.059605		4.42667	-0.00048
				4.42853	0.015736		4.43312	1.2331		4.43208	0.059128		4.43333	-0.00048
				4.4352	0.008583		4.43978	1.22738		4.43875	0.05722		4.44	-0.00143
				4.44187	0.003338		4.44645	1.22261		4.44542	0.055313		4.44667	-0.00238
				4.44853	0		4.45312	1.2188		4.45208	0.053883		4.45333	-0.00286
				4.4552	-0.00286		4.45978	1.21641		4.45875	0.052452		4.46	-0.00334
				4.46187	-0.00525		4.46645	1.21403		4.46542	0.050068		4.46667	-0.00429
				4.46853	-0.00811		4.47312	1.2126		4.47208	0.048161		4.47333	-0.00477
				4.4752	-0.01097		4.47978	1.21117		4.47875	0.04673		4.48	-0.00572
				4.48187	-0.01383		4.48645	1.20926		4.48542	0.045776		4.48667	-0.00763
				4.48853	-0.01812		4.49312	1.20592		4.49208	0.044823		4.49333	-0.00906
				4.4952	-0.02337		4.49978	1.20258		4.49875	0.044346		4.5	-0.01001
				4.50187	-0.02861		4.50645	1.19877		4.50542	0.043869		4.50667	-0.01049
				4.50853	-0.0329		4.51312	1.19448		4.51208	0.044346		4.51333	-0.0124
				4.5152	-0.03624		4.51978	1.19257		4.51875	0.0453		4.52	-0.01478
				4.52187	-0.0391		4.52645	1.19209		4.52542	0.047207		4.52667	-0.01812
				4.52853	-0.04005		4.53312	1.19305		4.53208	0.050068		4.53333	-0.02193
				4.5352	-0.0391		4.53978	1.194		4.53875	0.051975		4.54	-0.02575
				4.54187	-0.03719		4.54645	1.19495		4.54542	0.052452		4.54667	-0.02956
				4.54853	-0.03624		4.55312	1.19638		4.55208	0.051022		4.55333	-0.03242
				4.5552	-0.03672		4.55978	1.19686		4.55875	0.048161		4.56	-0.03481
				4.56187	-0.03862		4.56645	1.19638		4.56542	0.044346		4.56667	-0.03672
				4.56853	-0.04148		4.57312	1.19543		4.57208	0.040531		4.57333	-0.03767
				4.5752	-0.0453		4.57978	1.19591		4.57875	0.038147		4.58	-0.03862
				4.58187	-0.05054		4.58645	1.19734		4.58542	0.037193		4.58667	-0.03862
				4.58853	-0.05484		4.59312	1.19972		4.59208	0.037193		4.59333	-0.03862
				4.5952	-0.05865		4.59978	1.20211		4.59875	0.038147		4.6	-0.03862
				4.60187	-0.06056		4.60645	1.20354		4.60542	0.039101		4.60667	-0.03958
				4.60853	-0.06199		4.61312	1.20449		4.61208	0.038147		4.61333	-0.04148
				4.6152	-0.06199		4.61978	1.20449		4.61875	0.03624		4.62	-0.04435
				4.62187	-0.06056		4.62645	1.20401		4.62542	0.033855		4.62667	-0.04721
				4.62853	-0.0577		4.63312	1.20306		4.63208	0.030994		4.63333	-0.04864
				4.6352	-0.05341		4.63978	1.20306		4.63875	0.028133		4.64	-0.04864
				4.64187	-0.05054		4.64645	1.20401		4.64542	0.026226		4.64667	-0.04768
				4.64853	-0.05007		4.65312	1.20544		4.65208	0.024796		4.65333	-0.04721
				4.6552	-0.05198		4.65978	1.2083		4.65875	0.024319		4.66	-0.04864
				4.66187	-0.05436		4.66645	1.21117		4.66542	0.024796		4.66667	-0.05007
				4.66853	-0.05817		4.67312	1.2126		4.67208	0.026226		4.67333	-0.05293
				4.6752	-0.06151		4.67978	1.21117		4.67875	0.027657		4.68	-0.05674
				4.68187	-0.0639		4.68645	1.20878		4.68542	0.02861		4.68667	-0.0596
				4.68853	-0.0639		4.69312	1.2064		4.69208	0.028133		4.69333	-0.06008
				4.6952	-0.06151		4.69978	1.20354		4.69875	0.027657		4.7	-0.05817
				4.70187	-0.06008		4.70645	1.20068		4.70542	0.02718		4.70667	-0.05579
				4.70853	-0.06008		4.71312	1.19877		4.71208	0.026226		4.71333	-0.05245
				4.7152	-0.06247		4.71978	1.19924		4.71875	0.024796		4.72	-0.05007
				4.72187	-0.06533		4.72645	1.19924		4.72542	0.024319		4.72667	-0.04864
				4.72853	-0.06771		4.73312	1.19734		4.73208	0.024796		4.73333	-0.04864
				4.7352	-0.06914		4.73978	1.194		4.73875	0.025749		4.74	-0.05007
				4.74187	-0.06866		4.74645	1.19019		4.74542	0.025272		4.74667	-0.05293
				4.74853	-0.06676		4.75312	1.18542		4.75208	0.022888		4.75333	-0.05579
				4.7552	-0.06294		4.75978	1.18065		4.75875	0.020981		4.76	-0.0577
				4.76187	-0.0596		4.76645	1.17683		4.76542	0.01955		4.76667	-0.0577
				4.76853	-0.0596		4.77312	1.17397		4.77208	0.020027		4.77333	-0.05579
				4.7752	-0.06199		4.77978	1.17159		4.77875	0.020504		4.78	-0.05293
				4.78187	-0.06533		4.78645	1.16873		4.78542	0.021935		4.78667	-0.04864
				4.78853	-0.06914		4.79312	1.16634		4.79208	0.025272		4.79333	-0.04435
				4.7952	-0.07296		4.79978	1.16444		4.79875	0.029564		4.8	-0.04101
				4.80187	-0.07582		4.80645	1.16205		4.80542	0.032425		4.80667	-0.03958
				4.80853	-0.07677		4.81312	1.15967		4.81208	0.032902		4.81333	-0.03815
				4.8152	-0.07582		4.81978	1.15728		4.81875	0.032902		4.82	-0.03672
				4.82187	-0.07343		4.82645	1.15442		4.82542	0.031948		4.82667	-0.03529
				4.82853	-0.07105		4.83312	1.15156		4.83208	0.030994		4.83333	-0.0329
				4.8352	-0.06914		4.83978	1.14822		4.83875	0.030041		4.84	-0.02909
				4.84187	-0.06866		4.84645	1.14536		4.84542	0.030518		4.84667	-0.0248
				4.84853	-0.06819		4.85312	1.14393		4.85208	0.031948		4.85333	-0.02146
				4.8552	-0.06914		4.85978	1.14393		4.85875	0.033379		4.86	-0.01812
				4.86187	-0.072		4.86645	1.14441		4.86542	0.034332		4.86667	-0.01669
				4.86853	-0.07439		4.87312	1.14536		4.87208	0.034332		4.87333	-0.01526
				4.8752	-0.07534		4.87978	1.14584		4.87875	0.033855		4.88	-0.01383
				4.88187	-0.07391		4.88645	1.14536		4.88542	0.031471		4.88667	-0.0124
				4.88853	-0.07153		4.89312	1.14203		4.89208	0.028133		4.89333	-0.00906
				4.8952	-0.07057		4.89978	1.13869		4.89875	0.023842		4.9	-0.00477
				4.90187	-0.06914		4.90645	1.13487		4.90542	0.022411		4.90667	0.000477
				4.90853	-0.06723		4.91312	1.13201		4.91208	0.023365		4.91333	0.006199
				4.9152	-0.06628		4.91978	1.12915		4.91875	0.025749		4.92	0.011921
				4.92187	-0.06676		4.92645	1.1282		4.92542	0.02861		4.92667	0.01812
				4.92853	-0.06771		4.93312	1.1282		4.93208	0.031948		4.93333	0.023842
				4.9352	-0.06723		4.93978	1.12915		4.93875	0.035763		4.94	0.029087
				4.94187	-0.06628		4.94645	1.12867		4.94542	0.040054		4.94667	0.034809
				4.94853	-0.0658		4.95312	1.12772		4.95208	0.042915		4.95333	0.041485
				4.9552	-0.0658		4.95978	1.12677		4.95875	0.044823		4.96	0.049591
				4.96187	-0.06485		4.96645	1.12677		4.96542	0.046253		4.96667	0.058174
				4.96853	-0.06342		4.97312	1.12629		4.97208	0.047207		4.97333	0.067711
				4.9752	-0.06247		4.97978	1.12534		4.97875	0.04673		4.98	0.077724
				4.98187	-0.06294		4.98645	1.12438		4.98542	0.044346		4.98667	0.086784
				4.98853	-0.06342		4.99312	1.12295		4.99208	0.041485		4.99333	0.095367
				4.9952	-0.06342		4.99978	1.12057		4.99875	0.038624		5	0.103951
				5.00187	-0.0639		5.00645	1.11723		5.00542	0.03624		5.00667	0.112534
				5.00853	-0.06485		5.01312	1.11437		5.01208	0.035763		5.01333	0.12207
				5.0152	-0.06485		5.01978	1.11389		5.01875	0.036716		5.02	0.131607
				5.02187	-0.06485		5.02645	1.11437		5.02542	0.038624		5.02667	0.144005
				5.02853	-0.06342		5.03312	1.11437		5.03208	0.041008		5.03333	0.157833
				5.0352	-0.06294		5.03978	1.11342		5.03875	0.043392		5.04	0.172615
				5.04187	-0.06294		5.04645	1.11342		5.04542	0.044823		5.04667	0.18692
				5.04853	-0.06247		5.05312	1.11294		5.05208	0.0453		5.05333	0.200748
				5.0552	-0.06199		5.05978	1.11294		5.05875	0.0453		5.06	0.212669
				5.06187	-0.06151		5.06645	1.11151		5.06542	0.046253		5.06667	0.22316
				5.06853	-0.06056		5.07312	1.11008		5.07208	0.047207		5.07333	0.23365
				5.0752	-0.05913		5.07978	1.10912		5.07875	0.048637		5.08	0.244617
				5.08187	-0.05722		5.08645	1.10865		5.08542	0.050068		5.08667	0.257969
				5.08853	-0.05627		5.09312	1.10722		5.09208	0.052452		5.09333	0.274658
				5.0952	-0.05674		5.09978	1.10435		5.09875	0.054359		5.1	0.296116
				5.10187	-0.05865		5.10645	1.10245		5.10542	0.055313		5.10667	0.319958
				5.10853	-0.06104		5.11312	1.10149		5.11208	0.054836		5.11333	0.344276
				5.1152	-0.06342		5.11978	1.10054		5.11875	0.054836		5.12	0.369549
				5.12187	-0.06485		5.12645	1.09959		5.12542	0.056744		5.12667	0.394344
				5.12853	-0.06533		5.13312	1.09959		5.13208	0.059605		5.13333	0.41914
				5.1352	-0.06485		5.13978	1.10054		5.13875	0.062466		5.14	0.444412
				5.14187	-0.06151		5.14645	1.10197		5.14542	0.064373		5.14667	0.471592
				5.14853	-0.05913		5.15312	1.10292		5.15208	0.065804		5.15333	0.501156
				5.1552	-0.05817		5.15978	1.10435		5.15875	0.066757		5.16	0.533104
				5.16187	-0.0596		5.16645	1.10531		5.16542	0.067711		5.16667	0.567913
				5.16853	-0.06104		5.17312	1.10626		5.17208	0.068188		5.17333	0.605106
				5.1752	-0.06151		5.17978	1.10626		5.17875	0.067234		5.18	0.645638
				5.18187	-0.0639		5.18645	1.10531		5.18542	0.066757		5.18667	0.69046
				5.18853	-0.0658		5.19312	1.10531		5.19208	0.066757		5.19333	0.740528
				5.1952	-0.06676		5.19978	1.10626		5.19875	0.066757		5.2	0.796318
				5.20187	-0.06628		5.20645	1.10674		5.20542	0.065804		5.20667	0.859261
				5.20853	-0.06533		5.21312	1.10579		5.21208	0.06485		5.21333	0.93174
				5.2152	-0.06437		5.21978	1.10531		5.21875	0.064373		5.22	1.01566
				5.22187	-0.06437		5.22645	1.10531		5.22542	0.065804		5.22667	1.11389
				5.22853	-0.06437		5.23312	1.10531		5.23208	0.067711		5.23333	1.22976
				5.2352	-0.06437		5.23978	1.10483		5.23875	0.071049		5.24	1.36661
				5.24187	-0.06437		5.24645	1.10435		5.24542	0.07391		5.24667	1.53112
				5.24853	-0.06485		5.25312	1.10626		5.25208	0.07534		5.25333	1.73044
				5.2552	-0.0639		5.25978	1.10912		5.25875	0.075817		5.26	1.97124
				5.26187	-0.06247		5.26645	1.11103		5.26542	0.076294		5.26667	2.26212
				5.26853	-0.0596		5.27312	1.11151		5.27208	0.07534		5.27333	2.61497
				5.2752	-0.05627		5.27978	1.11103		5.27875	0.07391		5.28	3.04174
				5.28187	-0.05341		5.28645	1.11055		5.28542	0.072479		5.28667	3.55768
				5.28853	-0.05102		5.29312	1.11151		5.29208	0.073433		5.29333	4.17852
				5.2952	-0.04816		5.29978	1.11198		5.29875	0.075817		5.3	4.92144
				5.30187	-0.04387		5.30645	1.11342		5.30542	0.077724		5.30667	5.80549
				5.30853	-0.03862		5.31312	1.11675		5.31208	0.077724		5.31333	6.85215
				5.3152	-0.03099		5.31978	1.12152		5.31875	0.077248		5.32	8.08287
				5.32187	-0.02146		5.32645	1.12677		5.32542	0.076294		5.32667	9.52053
				5.32853	-0.00906		5.33312	1.1301		5.33208	0.074863		5.33333	11.1866
				5.3352	0.006199		5.33978	1.13344		5.33875	0.07391		5.34	13.1025
				5.34187	0.023842		5.34645	1.1363		5.34542	0.072479		5.34667	15.2888
				5.34853	0.0453		5.35312	1.13726		5.35208	0.072479		5.35333	17.7608
				5.3552	0.070095		5.35978	1.13678		5.35875	0.072956		5.36	20.5297
				5.36187	0.097752		5.36645	1.13535		5.36542	0.073433		5.36667	23.5987
				5.36853	0.127792		5.37312	1.13392		5.37208	0.074387		5.37333	26.9642
				5.3752	0.160217		5.37978	1.13344		5.37875	0.076294		5.38	30.6144
				5.38187	0.195026		5.38645	1.13535		5.38542	0.078201		5.38667	34.5292
				5.38853	0.23222		5.39312	1.14012		5.39208	0.079632		5.39333	38.6777
				5.3952	0.272274		5.39978	1.14679		5.39875	0.081062		5.4	43.0169
				5.40187	0.31662		5.40645	1.15204		5.40542	0.08297		5.40667	47.4963
				5.40853	0.363827		5.41312	1.15681		5.41208	0.084877		5.41333	52.0568
				5.4152	0.414848		5.41978	1.16062		5.41875	0.086308		5.42	56.6316
				5.42187	0.468731		5.42645	1.16396		5.42542	0.086308		5.42667	61.1496
				5.42853	0.524521		5.43312	1.16682		5.43208	0.086308		5.43333	65.5351
				5.4352	0.580788		5.43978	1.16968		5.43875	0.085354		5.44	69.7107
				5.44187	0.637054		5.44645	1.17445		5.44542	0.0844		5.44667	73.6017
				5.44853	0.691891		5.45312	1.18113		5.45208	0.082016		5.45333	77.1356
				5.4552	0.745296		5.45978	1.18876		5.45875	0.079632		5.46	80.2469
				5.46187	0.795841		5.46645	1.19638		5.46542	0.079632		5.46667	82.8776
				5.46853	0.844002		5.47312	1.20354		5.47208	0.083447		5.47333	84.9805
				5.4752	0.888348		5.47978	1.21164		5.47875	0.088692		5.48	86.524
				5.48187	0.927925		5.48645	1.21975		5.48542	0.093937		5.48667	87.4863
				5.48853	0.963211		5.49312	1.22786		5.49208	0.099659		5.49333	87.8587
				5.4952	0.994205		5.49978	1.23548		5.49875	0.105858		5.5	87.6479
				5.50187	1.01852		5.50645	1.24311		5.50542	0.112534		5.50667	86.8697
				5.50853	1.03283		5.51312	1.25027		5.51208	0.118256		5.51333	85.5508
				5.5152	1.03807		5.51978	1.2579		5.51875	0.123501		5.52	83.7269
				5.52187	1.03664		5.52645	1.26648		5.52542	0.130177		5.52667	81.4404
				5.52853	1.02806		5.53312	1.27649		5.53208	0.14019		5.53333	78.743
				5.5352	1.0109		5.53978	1.28698		5.53875	0.152111		5.54	75.6879
				5.54187	0.98753		5.54645	1.2989		5.54542	0.165939		5.54667	72.331
				5.54853	0.959873		5.55312	1.31082		5.55208	0.181675		5.55333	68.7299
				5.5552	0.927448		5.55978	1.32227		5.55875	0.199795		5.56	64.9443
				5.56187	0.890255		5.56645	1.33324		5.56542	0.221252		5.56667	61.0318
				5.56853	0.848293		5.57312	1.3442		5.57208	0.243664		5.57333	57.0464
				5.5752	0.80061		5.57978	1.35565		5.57875	0.267029		5.58	53.0376
				5.58187	0.749111		5.58645	1.36805		5.58542	0.292301		5.58667	49.0494
				5.58853	0.696182		5.59312	1.38331		5.59208	0.322819		5.59333	45.1236
				5.5952	0.642776		5.59978	1.39999		5.59875	0.357628		5.6	41.297
				5.60187	0.590801		5.60645	1.41621		5.60542	0.396252		5.60667	37.5996
				5.60853	0.53978		5.61312	1.43385		5.61208	0.439167		5.61333	34.0567
				5.6152	0.491142		5.61978	1.45197		5.61875	0.486851		5.62	30.6878
				5.62187	0.443935		5.62645	1.47104		5.62542	0.539303		5.62667	27.5126
				5.62853	0.397682		5.63312	1.49012		5.63208	0.593662		5.63333	24.5428
				5.6352	0.350475		5.63978	1.50967		5.63875	0.649452		5.64	21.7857
				5.64187	0.303745		5.64645	1.53112		5.64542	0.706196		5.64667	19.2437
				5.64853	0.258923		5.65312	1.55401		5.65208	0.76437		5.65333	16.9163
				5.6552	0.216961		5.65978	1.57976		5.65875	0.824928		5.66	14.8001
				5.66187	0.178814		5.66645	1.60694		5.66542	0.88644		5.66667	12.8884
				5.66853	0.144005		5.67312	1.63555		5.67208	0.948429		5.67333	11.1723
				5.6752	0.11301		5.67978	1.66607		5.67875	1.01042		5.68	9.64022
				5.68187	0.087261		5.68645	1.69849		5.68542	1.06955		5.68667	8.28171
				5.68853	0.064373		5.69312	1.73521		5.69208	1.12629		5.69333	7.08532
				5.6952	0.042439		5.69978	1.77479		5.69875	1.17731		5.7	6.03914
				5.70187	0.021458		5.70645	1.81866		5.70542	1.22213		5.70667	5.12886
				5.70853	0.002384		5.71312	1.86825		5.71208	1.26123		5.71333	4.34017
				5.7152	-0.01431		5.71978	1.9269		5.71875	1.29366		5.72	3.6602
				5.72187	-0.03004		5.72645	1.99604		5.72542	1.31988		5.72667	3.07798
				5.72853	-0.04435		5.73312	2.07615		5.73208	1.33944		5.73333	2.58064
				5.7352	-0.05627		5.73978	2.1677		5.73875	1.35231		5.74	2.15721
				5.74187	-0.06294		5.74645	2.27356		5.74542	1.35708		5.74667	1.79863
				5.74853	-0.0658		5.75312	2.39801		5.75208	1.35374		5.75333	1.49822
				5.7552	-0.06723		5.75978	2.54488		5.75875	1.34373		5.76	1.24788
				5.76187	-0.06962		5.76645	2.71702		5.76542	1.32799		5.76667	1.03855
				5.76853	-0.07105		5.77312	2.91967		5.77208	1.3051		5.77333	0.862598
				5.7752	-0.07296		5.77978	3.16		5.77875	1.27459		5.78	0.716209
				5.78187	-0.07629		5.78645	3.44801		5.78542	1.23787		5.78667	0.596046
				5.78853	-0.08154		5.79312	3.79276		5.79208	1.19638		5.79333	0.497818
				5.7952	-0.08774		5.79978	4.20332		5.79875	1.14965		5.8	0.416756
				5.80187	-0.09298		5.80645	4.69208		5.80542	1.09816		5.80667	0.349522
				5.80853	-0.09584		5.81312	5.27287		5.81208	1.04284		5.81333	0.293255
				5.8152	-0.09727		5.81978	5.96046		5.81875	0.984669		5.82	0.246048
				5.82187	-0.09823		5.82645	6.7687		5.82542	0.925064		5.82667	0.205994
				5.82853	-0.09823		5.83312	7.71713		5.83208	0.863552		5.83333	0.171661
				5.8352	-0.09871		5.83978	8.82292		5.83875	0.801563		5.84	0.143528
				5.84187	-0.09871		5.84645	10.1075		5.84542	0.740528		5.84667	0.121593
				5.84853	-0.09918		5.85312	11.5919		5.85208	0.681877		5.85333	0.105381
				5.8552	-0.09966		5.85978	13.2971		5.85875	0.625134		5.86	0.09346
				5.86187	-0.09966		5.86645	15.2416		5.86542	0.570774		5.86667	0.08297
				5.86853	-0.09823		5.87312	17.4422		5.87208	0.517845		5.87333	0.07391
				5.8752	-0.09489		5.87978	19.9151		5.87875	0.468254		5.88	0.065327
				5.88187	-0.09108		5.88645	22.6722		5.88542	0.423431		5.88667	0.056744
				5.88853	-0.08774		5.89312	25.722		5.89208	0.382423		5.89333	0.047207
				5.8952	-0.08631		5.89978	29.069		5.89875	0.34523		5.9	0.039101
				5.90187	-0.08678		5.90645	32.7091		5.90542	0.310898		5.90667	0.033379
				5.90853	-0.08917		5.91312	36.633		5.91208	0.281334		5.91333	0.029087
				5.9152	-0.09298		5.91978	40.823		5.91875	0.255108		5.92	0.024796
				5.92187	-0.0968		5.92645	45.2504		5.92542	0.231743		5.92667	0.020027
				5.92853	-0.10061		5.93312	49.8796		5.93208	0.210762		5.93333	0.015259
				5.9352	-0.10395		5.93978	54.6641		5.93875	0.193596		5.94	0.01049
				5.94187	-0.10538		5.94645	59.5498		5.94542	0.178814		5.94667	0.004292
				5.94853	-0.10443		5.95312	64.477		5.95208	0.166416		5.95333	-0.00143
				5.9552	-0.10252		5.95978	69.3774		5.95875	0.155449		5.96	-0.00668
				5.96187	-0.10061		5.96645	74.1806		5.96542	0.144958		5.96667	-0.01192
				5.96853	-0.09918		5.97312	78.8117		5.97208	0.134945		5.97333	-0.01526
				5.9752	-0.09727		5.97978	83.1943		5.97875	0.125885		5.98	-0.01669
				5.98187	-0.09632		5.98645	87.2541		5.98542	0.118256		5.98667	-0.0186
				5.98853	-0.09727		5.99312	90.919		5.99208	0.112534		5.99333	-0.02003
				5.9952	-0.09966		5.99978	94.1257		5.99875	0.108719		6	-0.02146
				6.00187	-0.10395		6.00645	96.8204		6.00542	0.105858		6.00667	-0.02241
				6.00853	-0.10824		6.01312	98.9556		6.01208	0.104427		6.01333	-0.02432
				6.0152	-0.11206		6.01978	100.497		6.01875	0.104427		6.02	-0.02766
				6.02187	-0.11492		6.02645	101.423		6.02542	0.104427		6.02667	-0.03147
				6.02853	-0.11635		6.03312	101.728		6.03208	0.104427		6.03333	-0.03529
				6.0352	-0.11778		6.03978	101.412		6.03875	0.104427		6.04	-0.0391
				6.04187	-0.1173		6.04645	100.491		6.04542	0.103474		6.04667	-0.04339
				6.04853	-0.11492		6.05312	98.9909		6.05208	0.102043		6.05333	-0.04721
				6.0552	-0.11206		6.05978	96.9467		6.05875	0.100136		6.06	-0.05054
				6.06187	-0.11015		6.06645	94.4018		6.06542	0.098705		6.06667	-0.05388
				6.06853	-0.10872		6.07312	91.4054		6.07208	0.097275		6.07333	-0.05817
				6.0752	-0.10681		6.07978	88.0127		6.07875	0.096321		6.08	-0.06199
				6.08187	-0.1049		6.08645	84.2814		6.08542	0.095844		6.08667	-0.0639
				6.08853	-0.10538		6.09312	80.2736		6.09208	0.096321		6.09333	-0.06485
				6.0952	-0.10824		6.09978	76.0508		6.09875	0.097275		6.1	-0.06533
				6.10187	-0.11063		6.10645	71.6724		6.10542	0.096321		6.10667	-0.0658
				6.10853	-0.11253		6.11312	67.1968		6.11208	0.094891		6.11333	-0.06437
				6.1152	-0.11444		6.11978	62.6802		6.11875	0.092983		6.12	-0.06294
				6.12187	-0.11635		6.12645	58.1741		6.12542	0.091553		6.12667	-0.06342
				6.12853	-0.11873		6.13312	53.7248		6.13208	0.09203		6.13333	-0.0658
				6.1352	-0.12016		6.13978	49.3732		6.13875	0.094414		6.14	-0.06819
				6.14187	-0.11921		6.14645	45.1555		6.14542	0.097752		6.14667	-0.07057
				6.14853	-0.11826		6.15312	41.101		6.15208	0.102997		6.15333	-0.072
				6.1552	-0.11778		6.15978	37.2338		6.15875	0.108719		6.16	-0.07248
				6.16187	-0.11635		6.16645	33.5736		6.16542	0.11301		6.16667	-0.07153
				6.16853	-0.11396		6.17312	30.1351		6.17208	0.114441		6.17333	-0.06962
				6.1752	-0.11063		6.17978	26.9289		6.17875	0.113964		6.18	-0.06628
				6.18187	-0.10872		6.18645	23.9601		6.18542	0.112534		6.18667	-0.06294
				6.18853	-0.10729		6.19312	21.2297		6.19208	0.109673		6.19333	-0.06104
				6.1952	-0.10538		6.19978	18.7383		6.19875	0.107288		6.2	-0.06008
				6.20187	-0.10109		6.20645	16.479		6.20542	0.104904		6.20667	-0.05865
				6.20853	-0.09584		6.21312	14.442		6.21208	0.103951		6.21333	-0.05627
				6.2152	-0.09012		6.21978	12.6171		6.21875	0.104427		6.22	-0.05293
				6.22187	-0.08392		6.22645	10.9921		6.22542	0.105381		6.22667	-0.04864
				6.22853	-0.07677		6.23312	9.55582		6.23208	0.106335		6.23333	-0.04292
				6.2352	-0.06962		6.23978	8.29267		6.23875	0.107288		6.24	-0.03624
				6.24187	-0.06437		6.24645	7.18737		6.24542	0.108242		6.24667	-0.02861
				6.24853	-0.06008		6.25312	6.22702		6.25208	0.108719		6.25333	-0.0205
				6.2552	-0.05627		6.25978	5.39827		6.25875	0.109196		6.26	-0.0124
				6.26187	-0.05102		6.26645	4.68683		6.26542	0.108719		6.26667	-0.00477
				6.26853	-0.04339		6.27312	4.07887		6.27208	0.109196		6.27333	0.002861
				6.2752	-0.03529		6.27978	3.56054		6.27875	0.110626		6.28	0.010014
				6.28187	-0.02623		6.28645	3.1209		6.28542	0.11301		6.28667	0.015736
				6.28853	-0.01717		6.29312	2.74849		6.29208	0.114441		6.29333	0.020981
				6.2952	-0.00858		6.29978	2.43473		6.29875	0.116348		6.3	0.028133
				6.30187	-0.00048		6.30645	2.17199		6.30542	0.118732		6.30667	0.034332
				6.30853	0.005722		6.31312	1.95265		6.31208	0.121117		6.31333	0.038624
				6.3152	0.010967		6.31978	1.77145		6.31875	0.123024		6.32	0.040531
				6.32187	0.014782		6.32645	1.6222		6.32542	0.123978		6.32667	0.042439
				6.32853	0.017166		6.33312	1.49918		6.33208	0.125885		6.33333	0.043392
				6.3352	0.01812		6.33978	1.39761		6.33875	0.127792		6.34	0.041485
				6.34187	0.01812		6.34645	1.31321		6.34542	0.130177		6.34667	0.039101
				6.34853	0.016689		6.35312	1.24311		6.35208	0.133038		6.35333	0.03624
				6.3552	0.015259		6.35978	1.18542		6.35875	0.136375		6.36	0.035286
				6.36187	0.013351		6.36645	1.13773		6.36542	0.139236		6.36667	0.033379
				6.36853	0.012875		6.37312	1.09768		6.37208	0.142574		6.37333	0.030041
				6.3752	0.011444		6.37978	1.06287		6.37875	0.145912		6.38	0.026703
				6.38187	0.008106		6.38645	1.03188		6.38542	0.148296		6.38667	0.022411
				6.38853	0.002384		6.39312	1.00422		6.39208	0.151157		6.39333	0.017166
				6.3952	-0.00477		6.39978	0.979424		6.39875	0.154972		6.4	0.01049
				6.40187	-0.01335		6.40645	0.958443		6.40542	0.160217		6.40667	0.002861
				6.40853	-0.02193		6.41312	0.941277		6.41208	0.165462		6.41333	-0.00715
				6.4152	-0.03099		6.41978	0.928402		6.41875	0.171661		6.42	-0.0186
				6.42187	-0.04005		6.42645	0.917912		6.42542	0.179768		6.42667	-0.03004
				6.42853	-0.04721		6.43312	0.907898		6.43208	0.187397		6.43333	-0.04148
				6.4352	-0.05293		6.43978	0.896931		6.43875	0.19455		6.44	-0.05198
				6.44187	-0.05913		6.44645	0.885487		6.44542	0.201225		6.44667	-0.06104
				6.44853	-0.06676		6.45312	0.873566		6.45208	0.207901		6.45333	-0.06819
				6.4552	-0.07391		6.45978	0.861168		6.45875	0.212669		6.46	-0.07486
				6.46187	-0.08059		6.46645	0.850201		6.46542	0.216484		6.46667	-0.08059
				6.46853	-0.08869		6.47312	0.842094		6.47208	0.220776		6.47333	-0.08631
				6.4752	-0.0968		6.47978	0.836372		6.47875	0.226498		6.48	-0.09203
				6.48187	-0.10347		6.48645	0.831604		6.48542	0.23222		6.48667	-0.09727
				6.48853	-0.1092		6.49312	0.827312		6.49208	0.237465		6.49333	-0.10204
				6.4952	-0.11444		6.49978	0.823975		6.49875	0.244141		6.5	-0.10777
				6.50187	-0.12016		6.50645	0.82016		6.50542	0.250816		6.50667	-0.11301
				6.50853	-0.12541		6.51312	0.815392		6.51208	0.254631		6.51333	-0.11873
				6.5152	-0.13161		6.51978	0.810623		6.51875	0.255108		6.52	-0.1235
				6.52187	-0.13828		6.52645	0.806808		6.52542	0.254154		6.52667	-0.12732
				6.52853	-0.14448		6.53312	0.803947		6.53208	0.253201		6.53333	-0.13065
				6.5352	-0.14973		6.53978	0.801086		6.53875	0.25177		6.54	-0.13304
				6.54187	-0.15402		6.54645	0.797749		6.54542	0.248432		6.54667	-0.13494
				6.54853	-0.1564		6.55312	0.793934		6.55208	0.245571		6.55333	-0.13685
				6.5552	-0.15736		6.55978	0.790119		6.55875	0.243664		6.56	-0.13971
				6.56187	-0.15879		6.56645	0.785828		6.56542	0.240803		6.56667	-0.14305
				6.56853	-0.16069		6.57312	0.780106		6.57208	0.236034		6.57333	-0.14544
				6.5752	-0.16403		6.57978	0.776291		6.57875	0.228882		6.58	-0.14687
				6.58187	-0.16785		6.58645	0.775814		6.58542	0.220776		6.58667	-0.1483
				6.58853	-0.17214		6.59312	0.776768		6.59208	0.212193		6.59333	-0.14925
				6.5952	-0.17595		6.59978	0.777245		6.59875	0.204086		6.6	-0.14973
				6.60187	-0.17786		6.60645	0.777245		6.60542	0.195503		6.60667	-0.1502
				6.60853	-0.17881		6.61312	0.777721		6.61208	0.186443		6.61333	-0.15068
				6.6152	-0.17834		6.61978	0.777721		6.61875	0.176907		6.62	-0.15116
				6.62187	-0.17786		6.62645	0.777245		6.62542	0.167847		6.62667	-0.15259
				6.62853	-0.17786		6.63312	0.776291		6.63208	0.158787		6.63333	-0.15545
				6.6352	-0.17881		6.63978	0.775814		6.63875	0.14925		6.64	-0.15926
				6.64187	-0.17977		6.64645	0.776291		6.64542	0.139236		6.64667	-0.1626
				6.64853	-0.1812		6.65312	0.778198		6.65208	0.130653		6.65333	-0.16499
				6.6552	-0.18311		6.65978	0.780582		6.65875	0.123978		6.66	-0.16737
				6.66187	-0.18549		6.66645	0.78249		6.66542	0.118732		6.66667	-0.16975
				6.66853	-0.18835		6.67312	0.784397		6.67208	0.114441		6.67333	-0.17214
				6.6752	-0.19169		6.67978	0.788212		6.67875	0.110626		6.68	-0.17357
				6.68187	-0.1936		6.68645	0.792503		6.68542	0.108242		6.68667	-0.17548
				6.68853	-0.19503		6.69312	0.795841		6.69208	0.106812		6.69333	-0.17738
				6.6952	-0.1955		6.69978	0.797272		6.69875	0.103474		6.7	-0.17834
				6.70187	-0.19503		6.70645	0.798702		6.70542	0.099182		6.70667	-0.17691
				6.70853	-0.19407		6.71312	0.800133		6.71208	0.094414		6.71333	-0.17452
				6.7152	-0.19312		6.71978	0.80061		6.71875	0.090122		6.72	-0.17262
				6.72187	-0.19312		6.72645	0.801563		6.72542	0.086308		6.72667	-0.17166
				6.72853	-0.1936		6.73312	0.802517		6.73208	0.082493		6.73333	-0.17118
				6.7352	-0.19407		6.73978	0.804901		6.73875	0.080585		6.74	-0.17118
				6.74187	-0.1936		6.74645	0.807285		6.74542	0.080585		6.74667	-0.17166
				6.74853	-0.19312		6.75312	0.809669		6.75208	0.080585		6.75333	-0.17357
				6.7552	-0.19169		6.75978	0.809669		6.75875	0.080585		6.76	-0.17548
				6.76187	-0.19073		6.76645	0.807285		6.76542	0.081062		6.76667	-0.17738
				6.76853	-0.18978		6.77312	0.803471		6.77208	0.082493		6.77333	-0.18024
				6.7752	-0.18978		6.77978	0.797749		6.77875	0.083447		6.78	-0.18215
				6.78187	-0.19169		6.78645	0.791073		6.78542	0.083447		6.78667	-0.18311
				6.78853	-0.19503		6.79312	0.783443		6.79208	0.082493		6.79333	-0.1812
				6.7952	-0.20027		6.79978	0.775337		6.79875	0.079632		6.8	-0.17834
				6.80187	-0.20599		6.80645	0.768185		6.80542	0.076771		6.80667	-0.17595
				6.80853	-0.21124		6.81312	0.760555		6.81208	0.072002		6.81333	-0.17595
				6.8152	-0.21458		6.81978	0.751972		6.81875	0.067234		6.82	-0.17786
				6.82187	-0.21601		6.82645	0.740528		6.82542	0.062943		6.82667	-0.1812
				6.82853	-0.21601		6.83312	0.727177		6.83208	0.059128		6.83333	-0.18597
				6.8352	-0.21648		6.83978	0.712395		6.83875	0.05722		6.84	-0.18978
				6.84187	-0.21696		6.84645	0.698566		6.84542	0.054836		6.84667	-0.19169
				6.84853	-0.21791		6.85312	0.687599		6.85208	0.053406		6.85333	-0.19217
				6.8552	-0.22078		6.85978	0.678062		6.85875	0.051975		6.86	-0.19217
				6.86187	-0.22411		6.86645	0.669479		6.86542	0.051498		6.86667	-0.19312
				6.86853	-0.22793		6.87312	0.661373		6.87208	0.051022		6.87333	-0.1955
				6.8752	-0.23031		6.87978	0.653267		6.87875	0.050068		6.88	-0.20075
				6.88187	-0.23174		6.88645	0.644684		6.88542	0.049591		6.88667	-0.20695
				6.88853	-0.2327		6.89312	0.63467		6.89208	0.048161		6.89333	-0.21267
				6.8952	-0.23365		6.89978	0.623703		6.89875	0.0453		6.9	-0.21744
				6.90187	-0.23699		6.90645	0.612259		6.90542	0.041485		6.90667	-0.22221
				6.90853	-0.24223		6.91312	0.601292		6.91208	0.03624		6.91333	-0.22697
				6.9152	-0.24843		6.91978	0.590801		6.91875	0.029564		6.92	-0.2327
				6.92187	-0.25558		6.92645	0.580311		6.92542	0.021458		6.92667	-0.23937
				6.92853	-0.26321		6.93312	0.56982		6.93208	0.012875		6.93333	-0.247
				6.9352	-0.27275		6.93978	0.558376		6.93875	0.004768		6.94	-0.25654
				6.94187	-0.28229		6.94645	0.545979		6.94542	-0.00286		6.94667	-0.26703
				6.94853	-0.29135		6.95312	0.532627		6.95208	-0.01097		6.95333	-0.27657
				6.9552	-0.30136		6.95978	0.517845		6.95875	-0.02003		6.96	-0.28467
				6.96187	-0.31233		6.96645	0.50211		6.96542	-0.03052		6.96667	-0.29135
				6.96853	-0.32473		6.97312	0.484467		6.97208	-0.04244		6.97333	-0.29802
				6.9752	-0.3376		6.97978	0.466824		6.97875	-0.05531		6.98	-0.30613
				6.98187	-0.35095		6.98645	0.449657		6.98542	-0.07105		6.98667	-0.31567
				6.98853	-0.3643		6.99312	0.432968		6.99208	-0.08821		6.99333	-0.32759
				6.9952	-0.37861		6.99978	0.416279		6.99875	-0.10538		7	-0.34237
				7.00187	-0.39339		7.00645	0.397205		7.00542	-0.1235		7.00667	-0.35906
				7.00853	-0.40913		7.01312	0.376225		7.01208	-0.14257		7.01333	-0.37622
				7.0152	-0.42295		7.01978	0.351906		7.01875	-0.16165		7.02	-0.39387
				7.02187	-0.4344		7.02645	0.326157		7.02542	-0.1812		7.02667	-0.41151
				7.02853	-0.44346		7.03312	0.298977		7.03208	-0.20218		7.03333	-0.42772
				7.0352	-0.44966		7.03978	0.271797		7.03875	-0.22507		7.04	-0.44107
				7.04187	-0.45156		7.04645	0.244141		7.04542	-0.24939		7.04667	-0.45156
				7.04853	-0.44918		7.05312	0.217438		7.05208	-0.27418		7.05333	-0.45967
				7.0552	-0.44203		7.05978	0.192165		7.05875	-0.2985		7.06	-0.46539
				7.06187	-0.42915		7.06645	0.1688		7.06542	-0.32139		7.06667	-0.46635
				7.06853	-0.4077		7.07312	0.147343		7.07208	-0.34189		7.07333	-0.46253
				7.0752	-0.37766		7.07978	0.125885		7.07875	-0.35954		7.08	-0.45633
				7.08187	-0.33808		7.08645	0.106335		7.08542	-0.37575		7.08667	-0.4468
				7.08853	-0.28849		7.09312	0.090599		7.09208	-0.38958		7.09333	-0.43297
				7.0952	-0.22888		7.09978	0.077724		7.09875	-0.40054		7.1	-0.41533
				7.10187	-0.16069		7.10645	0.068188		7.10542	-0.40913		7.10667	-0.39577
				7.10853	-0.08869		7.11312	0.061035		7.11208	-0.41485		7.11333	-0.37718
				7.1152	-0.01574		7.11978	0.056744		7.11875	-0.41819		7.12	-0.3581
				7.12187	0.054359		7.12645	0.054359		7.12542	-0.42009		7.12667	-0.34046
				7.12853	0.117302		7.13312	0.052452		7.13208	-0.42057		7.13333	-0.32568
				7.1352	0.1688		7.13978	0.051498		7.13875	-0.42105		7.14	-0.31519
				7.14187	0.204086		7.14645	0.052452		7.14542	-0.41962		7.14667	-0.30994
				7.14853	0.220299		7.15312	0.05579		7.15208	-0.41533		7.15333	-0.3109
				7.1552	0.215054		7.15978	0.062466		7.15875	-0.40722		7.16	-0.319
				7.16187	0.188351		7.16645	0.069618		7.16542	-0.39434		7.16667	-0.33331
				7.16853	0.142574		7.17312	0.078678		7.17208	-0.37622		7.17333	-0.35334
				7.1752	0.082016		7.17978	0.089169		7.17875	-0.35238		7.18	-0.37813
				7.18187	0.009537		7.18645	0.101089		7.18542	-0.32234		7.18667	-0.4034
				7.18853	-0.06914		7.19312	0.112057		7.19208	-0.28563		7.19333	-0.42725
				7.1952	-0.14687		7.19978	0.121593		7.19875	-0.24033		7.2	-0.4487
				7.20187	-0.21791		7.20645	0.132561		7.20542	-0.18692		7.20667	-0.46921
				7.20853	-0.28181		7.21312	0.145435		7.21208	-0.12541		7.21333	-0.48733
				7.2152	-0.33712		7.21978	0.15831		7.21875	-0.05913		7.22	-0.50163
				7.22187	-0.38338		7.22645	0.1688		7.22542	0.00906		7.22667	-0.51308
				7.22853	-0.41819		7.23312	0.178814		7.23208	0.074387		7.23333	-0.52261
				7.2352	-0.44394		7.23978	0.190735		7.23875	0.130177		7.24	-0.52881
				7.24187	-0.46253		7.24645	0.203609		7.24542	0.172138		7.24667	-0.53072
				7.24853	-0.47493		7.25312	0.216484		7.25208	0.197887		7.25333	-0.52881
				7.2552	-0.48161		7.25978	0.230312		7.25875	0.20647		7.26	-0.52357
				7.26187	-0.48399		7.26645	0.246525		7.26542	0.197887		7.26667	-0.51641
				7.26853	-0.48351		7.27312	0.266075		7.27208	0.173569		7.27333	-0.50879
				7.2752	-0.48256		7.27978	0.286579		7.27875	0.138283		7.28	-0.50116
				7.28187	-0.48065		7.28645	0.310421		7.28542	0.097275		7.28667	-0.494
				7.28853	-0.47731		7.29312	0.339508		7.29208	0.055313		7.29333	-0.48733
				7.2952	-0.4735		7.29978	0.375271		7.29875	0.014782		7.3	-0.48065
				7.30187	-0.46921		7.30645	0.417709		7.30542	-0.02193		7.30667	-0.47302
				7.30853	-0.46444		7.31312	0.467777		7.31208	-0.05293		7.31333	-0.46206
				7.3152	-0.45824		7.31978	0.525475		7.31875	-0.07725		7.32	-0.44918
				7.32187	-0.45109		7.32645	0.58794		7.32542	-0.09489		7.32667	-0.43392
				7.32853	-0.44346		7.33312	0.650883		7.33208	-0.10872		7.33333	-0.41485
				7.3352	-0.43583		7.33978	0.711441		7.33875	-0.11921		7.34	-0.39148
				7.34187	-0.42868		7.34645	0.763893		7.34542	-0.12493		7.34667	-0.3643
				7.34853	-0.42248		7.35312	0.803471		7.35208	-0.12636		7.35333	-0.33283
				7.3552	-0.41771		7.35978	0.825882		7.35875	-0.12541		7.36	-0.29755
				7.36187	-0.41437		7.36645	0.82922		7.36542	-0.12255		7.36667	-0.26035
				7.36853	-0.41294		7.37312	0.815392		7.37208	-0.11778		7.37333	-0.22411
				7.3752	-0.41246		7.37978	0.784397		7.37875	-0.11253		7.38	-0.1936
				7.38187	-0.41246		7.38645	0.740528		7.38542	-0.10681		7.38667	-0.17262
				7.38853	-0.41294		7.39312	0.688553		7.39208	-0.10109		7.39333	-0.1626
				7.3952	-0.41389		7.39978	0.635147		7.39875	-0.09489		7.4	-0.16499
				7.40187	-0.41485		7.40645	0.585556		7.40542	-0.08774		7.40667	-0.17738
				7.40853	-0.41485		7.41312	0.542164		7.41208	-0.08202		7.41333	-0.19836
				7.4152	-0.41294		7.41978	0.506878		7.41875	-0.07677		7.42	-0.22316
				7.42187	-0.40817		7.42645	0.480652		7.42542	-0.07343		7.42667	-0.247
				7.42853	-0.39673		7.43312	0.462532		7.43208	-0.072		7.43333	-0.26274
				7.4352	-0.37289		7.43978	0.450611		7.43875	-0.07296		7.44	-0.26274
				7.44187	-0.32997		7.44645	0.442982		7.44542	-0.07534		7.44667	-0.23699
				7.44853	-0.25749		7.45312	0.43726		7.45208	-0.07772		7.45333	-0.17309
				7.4552	-0.14544		7.45978	0.432491		7.45875	-0.0782		7.46	-0.06008
				7.46187	0.014305		7.46645	0.429153		7.46542	-0.07772		7.46667	0.108719
				7.46853	0.222683		7.47312	0.4282		7.47208	-0.07534		7.47333	0.332355
				7.4752	0.471592		7.47978	0.428677		7.47875	-0.06866		7.48	0.597477
				7.48187	0.742435		7.48645	0.42963		7.48542	-0.05341		7.48667	0.878334
				7.48853	1.00803		7.49312	0.432491		7.49208	-0.02432		7.49333	1.14441
				7.4952	1.23835		7.49978	0.436306		7.49875	0.02861		7.5	1.36375
				7.50187	1.40524		7.50645	0.440598		7.50542	0.114441		7.50667	1.51157
				7.50853	1.49155		7.51312	0.444889		7.51208	0.239372		7.51333	1.5707
				7.5152	1.49012		7.51978	0.451565		7.51875	0.408649		7.52	1.53923
				7.52187	1.40667		7.52645	0.464439		7.52542	0.620842		7.52667	1.42765
				7.52853	1.25599		7.53312	0.485897		7.53208	0.864506		7.53333	1.25408
				7.5352	1.05906		7.53978	0.515938		7.53875	1.12009		7.54	1.04094
				7.54187	0.83828		7.54645	0.554562		7.54542	1.36423		7.54667	0.809669
				7.54853	0.613689		7.55312	0.604153		7.55208	1.57309		7.55333	0.579357
				7.5552	0.40102		7.55978	0.667572		7.55875	1.72377		7.56	0.367165
				7.56187	0.209808		7.56645	0.747204		7.56542	1.80149		7.56667	0.182629
				7.56853	0.04673		7.57312	0.847816		7.57208	1.79911		7.57333	0.031471
				7.5752	-0.08345		7.57978	0.975132		7.57875	1.72377		7.58	-0.08583
				7.58187	-0.18215		7.58645	1.13344		7.58542	1.58834		7.58667	-0.17166
				7.58853	-0.25415		7.59312	1.31702		7.59208	1.40905		7.59333	-0.23079
				7.5952	-0.30422		7.59978	1.51587		7.59875	1.20592		7.6	-0.26941
				7.60187	-0.33665		7.60645	1.71518		7.60542	0.997543		7.60667	-0.29373
				7.60853	-0.35667		7.61312	1.89781		7.61208	0.799656		7.61333	-0.30756
				7.6152	-0.36907		7.61978	2.04515		7.61875	0.622749		7.62	-0.31614
				7.62187	-0.37766		7.62645	2.14195		7.62542	0.471115		7.62667	-0.32187
				7.62853	-0.38338		7.63312	2.17915		7.63208	0.348091		7.63333	-0.32663
				7.6352	-0.38576		7.63978	2.15435		7.63875	0.253677		7.64	-0.3314
				7.64187	-0.38624		7.64645	2.07233		7.64542	0.183582		7.64667	-0.33617
				7.64853	-0.38671		7.65312	1.94502		7.65208	0.133991		7.65333	-0.34046
				7.6552	-0.38671		7.65978	1.78432		7.65875	0.100613		7.66	-0.34285
				7.66187	-0.38719		7.66645	1.60313		7.66542	0.078201		7.66667	-0.34332
				7.66853	-0.38815		7.67312	1.41573		7.67208	0.063896		7.67333	-0.34428
				7.6752	-0.3891		7.67978	1.23453		7.67875	0.054359		7.68	-0.34571
				7.68187	-0.39005		7.68645	1.06811		7.68542	0.048637		7.68667	-0.34809
				7.68853	-0.39101		7.69312	0.919819		7.69208	0.0453		7.69333	-0.35
				7.6952	-0.39196		7.69978	0.793457		7.69875	0.043392		7.7	-0.35143
				7.70187	-0.39196		7.70645	0.689983		7.70542	0.042439		7.70667	-0.35191
				7.70853	-0.39387		7.71312	0.607491		7.71208	0.041962		7.71333	-0.35
				7.7152	-0.39673		7.71978	0.544548		7.71875	0.041962		7.72	-0.34571
				7.72187	-0.40054		7.72645	0.496864		7.72542	0.042439		7.72667	-0.34046
				7.72853	-0.40293		7.73312	0.462055		7.73208	0.041962		7.73333	-0.33617
				7.7352	-0.40245		7.73978	0.437737		7.73875	0.041962		7.74	-0.33426
				7.74187	-0.40007		7.74645	0.422478		7.74542	0.041962		7.74667	-0.33474
				7.74853	-0.39625		7.75312	0.413895		7.75208	0.043392		7.75333	-0.33665
				7.7552	-0.39196		7.75978	0.409126		7.75875	0.046253		7.76	-0.33855
				7.76187	-0.38862		7.76645	0.405312		7.76542	0.049114		7.76667	-0.33998
				7.76853	-0.38624		7.77312	0.401974		7.77208	0.051975		7.77333	-0.34142
				7.7752	-0.38576		7.77978	0.399113		7.77875	0.053883		7.78	-0.34046
				7.78187	-0.38528		7.78645	0.395775		7.78542	0.054359		7.78667	-0.33569
				7.78853	-0.38481		7.79312	0.39196		7.79208	0.054836		7.79333	-0.32759
				7.7952	-0.38242		7.79978	0.39053		7.79875	0.054836		7.8	-0.31662
				7.80187	-0.3767		7.80645	0.391006		7.80542	0.05579		7.80667	-0.30375
				7.80853	-0.36907		7.81312	0.392437		7.81208	0.056744		7.81333	-0.28801
				7.8152	-0.36001		7.81978	0.394344		7.81875	0.058174		7.82	-0.27084
				7.82187	-0.34952		7.82645	0.396252		7.82542	0.060558		7.82667	-0.25368
				7.82853	-0.33712		7.83312	0.397205		7.83208	0.063419		7.83333	-0.23746
				7.8352	-0.32377		7.83978	0.395775		7.83875	0.066757		7.84	-0.22411
				7.84187	-0.30947		7.84645	0.393867		7.84542	0.070572		7.84667	-0.21315
				7.84853	-0.29659		7.85312	0.39196		7.85208	0.076294		7.85333	-0.20647
				7.8552	-0.28467		7.85978	0.39053		7.85875	0.084877		7.86	-0.20409
				7.86187	-0.27609		7.86645	0.389576		7.86542	0.095367		7.86667	-0.20742
				7.86853	-0.27132		7.87312	0.390053		7.87208	0.107765		7.87333	-0.21601
				7.8752	-0.27084		7.87978	0.391483		7.87875	0.12064		7.88	-0.22745
				7.88187	-0.27418		7.88645	0.393867		7.88542	0.132561		7.88667	-0.2408
				7.88853	-0.28133		7.89312	0.395775		7.89208	0.144958		7.89333	-0.25463
				7.8952	-0.29182		7.89978	0.398159		7.89875	0.155926		7.9	-0.26798
				7.90187	-0.30422		7.90645	0.401974		7.90542	0.165939		7.90667	-0.2799
				7.90853	-0.31662		7.91312	0.406742		7.91208	0.172615		7.91333	-0.28992
				7.9152	-0.32949		7.91978	0.413895		7.91875	0.175953		7.92	-0.29802
				7.92187	-0.34142		7.92645	0.422478		7.92542	0.174522		7.92667	-0.3047
				7.92853	-0.35095		7.93312	0.432014		7.93208	0.169754		7.93333	-0.31042
				7.9352	-0.35954		7.93978	0.441551		7.93875	0.161648		7.94	-0.31614
				7.94187	-0.36716		7.94645	0.451088		7.94542	0.150681		7.94667	-0.32091
				7.94853	-0.37432		7.95312	0.460625		7.95208	0.137806		7.95333	-0.32425
				7.9552	-0.38052		7.95978	0.469208		7.95875	0.124931		7.96	-0.32616
				7.96187	-0.38719		7.96645	0.47493		7.96542	0.113964		7.96667	-0.32759
				7.96853	-0.39387		7.97312	0.478745		7.97208	0.102997		7.97333	-0.32854
				7.9752	-0.39816		7.97978	0.480175		7.97875	0.09203		7.98	-0.32854
				7.98187	-0.4015		7.98645	0.480175		7.98542	0.082493		7.98667	-0.32806
				7.98853	-0.4034		7.99312	0.477314		7.99208	0.074863		7.99333	-0.32806
				7.9952	-0.40436		7.99978	0.473022		7.99875	0.068665		8	-0.32854
				8.00187	-0.40388		8.00645	0.468731		8.00542	0.062943		8.00667	-0.32854
				8.00853	-0.4034		8.01312	0.464916		8.01208	0.058174		8.01333	-0.32949
				8.0152	-0.40388		8.01978	0.460148		8.01875	0.056744		8.02	-0.33188
				8.02187	-0.40531		8.02645	0.452995		8.02542	0.055313		8.02667	-0.33331
				8.02853	-0.40627		8.03312	0.443459		8.03208	0.053883		8.03333	-0.33426
				8.0352	-0.40627		8.03978	0.432968		8.03875	0.051975		8.04	-0.33569
				8.04187	-0.40579		8.04645	0.421047		8.04542	0.051022		8.04667	-0.33712
				8.04853	-0.40531		8.05312	0.408649		8.05208	0.051022		8.05333	-0.3376
				8.0552	-0.40436		8.05978	0.396729		8.05875	0.050545		8.06	-0.33665
				8.06187	-0.4034		8.06645	0.387669		8.06542	0.050068		8.06667	-0.33665
				8.06853	-0.40483		8.07312	0.380516		8.07208	0.050068		8.07333	-0.33855
				8.0752	-0.40817		8.07978	0.375271		8.07875	0.051022		8.08	-0.34094
				8.08187	-0.41246		8.08645	0.371456		8.08542	0.052452		8.08667	-0.34332
				8.08853	-0.41723		8.09312	0.368118		8.09208	0.054359		8.09333	-0.34571
				8.0952	-0.42009		8.09978	0.36478		8.09875	0.05722		8.1	-0.34761
				8.10187	-0.42105		8.10645	0.361919		8.10542	0.061035		8.10667	-0.34714
				8.10853	-0.41962		8.11312	0.358582		8.11208	0.063896		8.11333	-0.34285
				8.1152	-0.41676		8.11978	0.355721		8.11875	0.065327		8.12	-0.3314
				8.12187	-0.41246		8.12645	0.35429		8.12542	0.06485		8.12667	-0.30947
				8.12853	-0.40579		8.13312	0.354767		8.13208	0.062943		8.13333	-0.26941
				8.1352	-0.3953		8.13978	0.356197		8.13875	0.060081		8.14	-0.19312
				8.14187	-0.3767		8.14645	0.357151		8.14542	0.056744		8.14667	-0.0515
				8.14853	-0.33855		8.15312	0.358105		8.15208	0.053406		8.15333	0.210762
				8.1552	-0.26417		8.15978	0.358582		8.15875	0.051975		8.16	0.685215
				8.16187	-0.12207		8.16645	0.358582		8.16542	0.053406		8.16667	1.52445
				8.16853	0.142097		8.17312	0.356674		8.17208	0.056744		8.17333	2.96354
				8.1752	0.622749		8.17978	0.353813		8.17875	0.060081		8.18	5.35154
				8.18187	1.47963		8.18645	0.352383		8.18542	0.063419		8.18667	9.18436
				8.18853	2.96402		8.19312	0.351906		8.19208	0.066757		8.19333	15.1272
				8.1952	5.46551		8.19978	0.351429		8.19875	0.072479		8.2	24.0211
				8.20187	9.55486		8.20645	0.349998		8.20542	0.082493		8.20667	36.8562
				8.20853	16.027		8.21312	0.349045		8.21208	0.101566		8.21333	54.6927
				8.2152	25.9256		8.21978	0.349045		8.21875	0.139236		8.22	78.5422
				8.22187	40.5378		8.22645	0.349045		8.22542	0.212669		8.22667	109.183
				8.22853	61.3332		8.23312	0.349045		8.23208	0.346661		8.23333	146.945
				8.2352	89.8333		8.23978	0.348091		8.23875	0.588417		8.24	191.487
				8.24187	127.397		8.24645	0.346184		8.24542	1.01709		8.24667	241.644
				8.24853	174.94		8.25312	0.344276		8.25208	1.76096		8.25333	295.373
				8.2552	232.609		8.25978	0.343323		8.25875	3.02362		8.26	349.828
				8.26187	299.503		8.26645	0.343323		8.26542	5.11408		8.26667	401.591
				8.26853	373.501		8.27312	0.344753		8.27208	8.48055		8.27333	447.033
				8.2752	451.246		8.27978	0.347137		8.27875	13.7429		8.28	482.765
				8.28187	528.346		8.28645	0.349522		8.28542	21.7233		8.28667	506.081
				8.28853	599.793		8.29312	0.350952		8.29208	33.4444		8.29333	515.295
				8.2952	660.533		8.29978	0.350952		8.29875	50.1037		8.3	509.938
				8.30187	706.105		8.30645	0.350475		8.30542	72.9866		8.30667	490.787
				8.30853	733.192		8.31312	0.351906		8.31208	103.328		8.31333	459.717
				8.3152	740.035		8.31978	0.356674		8.31875	142.129		8.32	419.403
				8.32187	726.598		8.32645	0.370502		8.32542	189.91		8.32667	372.945
				8.32853	694.506		8.33312	0.396252		8.33208	246.473		8.33333	323.496
				8.3352	646.75		8.33978	0.442505		8.33875	310.688		8.34	273.949
				8.34187	587.238		8.34645	0.52309		8.34542	380.405		8.34667	226.696
				8.34853	520.285		8.35312	0.661373		8.35208	452.497		8.35333	183.501
				8.3552	450.145		8.35978	0.893116		8.35875	523.058		8.36	145.46
				8.36187	380.623		8.36645	1.27411		8.36542	587.764		8.36667	113.062
				8.36853	314.804		8.37312	1.88875		8.37208	642.338		8.37333	86.3008
				8.3752	254.91		8.37978	2.85769		8.37875	683.058		8.38	64.8041
				8.38187	202.287		8.38645	4.35066		8.38542	707.192		8.38667	47.9679
				8.38853	157.502		8.39312	6.59466		8.39208	713.301		8.39333	35.0766
				8.3952	120.484		8.39978	9.88436		8.39875	701.365		8.4	25.403
				8.40187	90.6963		8.40645	14.5836		8.40542	672.731		8.40667	18.271
				8.40853	67.307		8.41312	21.1191		8.41208	629.891		8.41333	13.0901
				8.4152	49.3436		8.41978	29.9606		8.41875	576.125		8.42	9.37033
				8.42187	35.8224		8.42645	41.5907		8.42542	515.103		8.42667	6.72483
				8.42853	25.8265		8.43312	56.4556		8.43208	450.504		8.43333	4.85468
				8.4352	18.549		8.43978	74.8963		8.43875	385.692		8.44	3.5367
				8.44187	13.3162		8.44645	97.0735		8.44542	323.478		8.44667	2.60591
				8.44853	9.58776		8.45312	122.891		8.45208	265.989		8.45333	1.94645
				8.4552	6.94847		8.45978	151.945		8.45875	214.625		8.46	1.47581
				8.46187	5.0869		8.46645	183.477		8.46542	170.11		8.46667	1.1363
				8.46853	3.77274		8.47312	216.386		8.47208	132.595		8.47333	0.887394
				8.4752	2.84195		8.47978	249.26		8.47875	101.782		8.48	0.702858
				8.48187	2.17819		8.48645	280.485		8.48542	77.0664		8.48667	0.563622
				8.48853	1.69897		8.49312	308.382		8.49208	57.6658		8.49333	0.454903
				8.4952	1.34897		8.49978	331.36		8.49875	42.7327		8.5	0.367641
				8.50187	1.08957		8.50645	348.065		8.50542	31.4403		8.50667	0.297546
				8.50853	0.893593		8.51312	357.522		8.51208	23.0327		8.51333	0.239849
				8.5152	0.741959		8.51978	359.234		8.51875	16.8567		8.52	0.191212
				8.52187	0.621319		8.52645	353.227		8.52542	12.3687		8.52667	0.148773
				8.52853	0.524521		8.53312	340.025		8.53208	9.13382		8.53333	0.112534
				8.5352	0.444412		8.53978	320.573		8.53875	6.81591		8.54	0.080585
				8.54187	0.376701		8.54645	296.132		8.54542	5.16081		8.54667	0.051498
				8.54853	0.317574		8.55312	268.153		8.55208	3.97968		8.55333	0.024796
				8.5552	0.267029		8.55978	238.139		8.55875	3.13377		8.56	0.000477
				8.56187	0.222683		8.56645	207.515		8.56542	2.52438		8.56667	-0.02193
				8.56853	0.184059		8.57312	177.531		8.57208	2.08235		8.57333	-0.04244
				8.5752	0.14925		8.57978	149.198		8.57875	1.75714		8.58	-0.06056
				8.58187	0.118732		8.58645	123.258		8.58542	1.51396		8.58667	-0.07725
				8.58853	0.090599		8.59312	100.177		8.59208	1.32752		8.59333	-0.09203
				8.5952	0.063419		8.59978	80.1706		8.59875	1.1816		8.6	-0.10633
				8.60187	0.03624		8.60645	63.242		8.60542	1.06525		8.60667	-0.11873
				8.60853	0.009537		8.61312	49.2334		8.61208	0.971794		8.61333	-0.13018
				8.6152	-0.01621		8.61978	37.8799		8.61875	0.895977		8.62	-0.14162
				8.62187	-0.04053		8.62645	28.8529		8.62542	0.833988		8.62667	-0.15545
				8.62853	-0.06199		8.63312	21.8005		8.63208	0.782967		8.63333	-0.16975
				8.6352	-0.08059		8.63978	16.3755		8.63875	0.739574		8.64	-0.18358
				8.64187	-0.09537		8.64645	12.26		8.64542	0.701904		8.64667	-0.19693
				8.64853	-0.10777		8.65312	9.17721		8.65208	0.666618		8.65333	-0.20981
				8.6552	-0.11969		8.65978	6.89316		8.65875	0.632286		8.66	-0.22078
				8.66187	-0.13208		8.66645	5.2166		8.66542	0.600338		8.66667	-0.22936
				8.66853	-0.14639		8.67312	3.99303		8.67208	0.570297		8.67333	-0.23556
				8.6752	-0.16165		8.67978	3.10326		8.67875	0.542641		8.68	-0.24033
				8.68187	-0.17643		8.68645	2.45762		8.68542	0.517845		8.68667	-0.24414
				8.68853	-0.19073		8.69312	1.98793		8.69208	0.495434		8.69333	-0.24891
				8.6952	-0.20266		8.69978	1.64461		8.69875	0.47636		8.7	-0.25415
				8.70187	-0.21267		8.70645	1.39093		8.70542	0.459194		8.70667	-0.2594
				8.70853	-0.22078		8.71312	1.20258		8.71208	0.442982		8.71333	-0.26369
				8.7152	-0.22793		8.71978	1.06049		8.71875	0.427246		8.72	-0.26894
				8.72187	-0.23508		8.72645	0.95129		8.72542	0.411034		8.72667	-0.27609
				8.72853	-0.24319		8.73312	0.864983		8.73208	0.395298		8.73333	-0.28276
				8.7352	-0.25272		8.73978	0.795364		8.73875	0.380516		8.74	-0.28801
				8.74187	-0.26321		8.74645	0.739098		8.74542	0.365257		8.74667	-0.29373
				8.74853	-0.27275		8.75312	0.693798		8.75208	0.350475		8.75333	-0.29993
				8.7552	-0.2799		8.75978	0.656128		8.75875	0.337124		8.76	-0.30518
				8.76187	-0.28563		8.76645	0.623703		8.76542	0.32568		8.76667	-0.30851
				8.76853	-0.29135		8.77312	0.59557		8.77208	0.315189		8.77333	-0.30851
				8.7752	-0.29707		8.77978	0.570774		8.77875	0.306129		8.78	-0.30613
				8.78187	-0.30327		8.78645	0.54884		8.78542	0.298023		8.78667	-0.30375
				8.78853	-0.31137		8.79312	0.529289		8.79208	0.291824		8.79333	-0.30184
				8.7952	-0.32139		8.79978	0.512123		8.79875	0.285149		8.8	-0.30184
				8.80187	-0.3314		8.80645	0.497341		8.80542	0.277996		8.80667	-0.30279
				8.80853	-0.33903		8.81312	0.484467		8.81208	0.270367		8.81333	-0.30565
				8.8152	-0.34523		8.81978	0.473499		8.81875	0.262737		8.82	-0.30994
				8.82187	-0.34904		8.82645	0.463009		8.82542	0.253677		8.82667	-0.31519
				8.82853	-0.35095		8.83312	0.452042		8.83208	0.244141		8.83333	-0.31805
				8.8352	-0.35		8.83978	0.440121		8.83875	0.234604		8.84	-0.31996
				8.84187	-0.34809		8.84645	0.427246		8.84542	0.226498		8.84667	-0.32187
				8.84853	-0.34523		8.85312	0.414848		8.85208	0.218868		8.85333	-0.32473
				8.8552	-0.34285		8.85978	0.401974		8.85875	0.211716		8.86	-0.32759
				8.86187	-0.34237		8.86645	0.390053		8.86542	0.207424		8.86667	-0.32949
				8.86853	-0.34285		8.87312	0.380516		8.87208	0.20504		8.87333	-0.3314
				8.8752	-0.34428		8.87978	0.373363		8.87875	0.204086		8.88	-0.33426
				8.88187	-0.34666		8.88645	0.367165		8.88542	0.202656		8.88667	-0.33712
				8.88853	-0.35095		8.89312	0.361919		8.89208	0.201702		8.89333	-0.34046
				8.8952	-0.3562		8.89978	0.357628		8.89875	0.200272		8.9	-0.34428
				8.90187	-0.36097		8.90645	0.352383		8.90542	0.197887		8.90667	-0.34952
				8.90853	-0.3643		8.91312	0.344753		8.91208	0.193596		8.91333	-0.3562
				8.9152	-0.36669		8.91978	0.335217		8.91875	0.189781		8.92	-0.36287
				8.92187	-0.3705		8.92645	0.326157		8.92542	0.187874		8.92667	-0.36907
				8.92853	-0.37575		8.93312	0.317097		8.93208	0.187397		8.93333	-0.37384
				8.9352	-0.38052		8.93978	0.308514		8.93875	0.187874		8.94	-0.37718
				8.94187	-0.38433		8.94645	0.301361		8.94542	0.188828		8.94667	-0.37861
				8.94853	-0.38815		8.95312	0.296116		8.95208	0.190258		8.95333	-0.37861
				8.9552	-0.39196		8.95978	0.292301		8.95875	0.190258		8.96	-0.37861
				8.96187	-0.39577		8.96645	0.28801		8.96542	0.188828		8.96667	-0.37956
				8.96853	-0.39816		8.97312	0.284195		8.97208	0.185966		8.97333	-0.38099
				8.9752	-0.40007		8.97978	0.279427		8.97875	0.180721		8.98	-0.38338
				8.98187	-0.40245		8.98645	0.273705		8.98542	0.174522		8.98667	-0.38671
				8.98853	-0.40674		8.99312	0.267982		8.99208	0.167847		8.99333	-0.39053
				8.9952	-0.41199		8.99978	0.263214		8.99875	0.162125		9	-0.39291
				9.00187	-0.41771		9.00645	0.259399		9.00542	0.157356		9.00667	-0.39387
				9.00853	-0.42248		9.01312	0.257015		9.01208	0.153065		9.01333	-0.39625
				9.0152	-0.42725		9.01978	0.254154		9.01875	0.150204		9.02	-0.40007
				9.02187	-0.43297		9.02645	0.250816		9.02542	0.14782		9.02667	-0.40483
				9.02853	-0.43821		9.03312	0.246048		9.03208	0.147343		9.03333	-0.40913
				9.0352	-0.4425		9.03978	0.24128		9.03875	0.148296		9.04	-0.41342
				9.04187	-0.44537		9.04645	0.236511		9.04542	0.14925		9.04667	-0.41866
				9.04853	-0.44823		9.05312	0.231743		9.05208	0.148773		9.05333	-0.42391
				9.0552	-0.45109		9.05978	0.228405		9.05875	0.148296		9.06	-0.4282
				9.06187	-0.45252		9.06645	0.226021		9.06542	0.146866		9.06667	-0.43249
				9.06853	-0.45443		9.07312	0.22459		9.07208	0.143528		9.07333	-0.43774
				9.0752	-0.45633		9.07978	0.224113		9.07875	0.139713		9.08	-0.4425
				9.08187	-0.45967		9.08645	0.223637		9.08542	0.135899		9.08667	-0.44632
				9.08853	-0.46301		9.09312	0.22316		9.09208	0.132084		9.09333	-0.4487
				9.0952	-0.46682		9.09978	0.220776		9.09875	0.128269		9.1	-0.44918
				9.10187	-0.47064		9.10645	0.219345		9.10542	0.123978		9.10667	-0.44823
				9.10853	-0.47445		9.11312	0.219822		9.11208	0.119209		9.11333	-0.44727
				9.1152	-0.47779		9.11978	0.220776		9.11875	0.114441		9.12	-0.44632
				9.12187	-0.48065		9.12645	0.221252		9.12542	0.107765		9.12667	-0.44537
				9.12853	-0.48399		9.13312	0.221252		9.13208	0.101566		9.13333	-0.44537
				9.1352	-0.48685		9.13978	0.222206		9.13875	0.095844		9.14	-0.44584
				9.14187	-0.48876		9.14645	0.222683		9.14542	0.090599		9.14667	-0.44632
				9.14853	-0.49067		9.15312	0.221729		9.15208	0.086784		9.15333	-0.44584
				9.1552	-0.49353		9.15978	0.219822		9.15875	0.084877		9.16	-0.44489
				9.16187	-0.49591		9.16645	0.217915		9.16542	0.085354		9.16667	-0.44394
				9.16853	-0.49782		9.17312	0.216961		9.17208	0.086308		9.17333	-0.44441
				9.1752	-0.49925		9.17978	0.21553		9.17875	0.086784		9.18	-0.44441
				9.18187	-0.50163		9.18645	0.214577		9.18542	0.085831		9.18667	-0.44537
				9.18853	-0.50354		9.19312	0.214577		9.19208	0.082493		9.19333	-0.44584
				9.1952	-0.50354		9.19978	0.2141		9.19875	0.076771		9.2	-0.44632
				9.20187	-0.50306		9.20645	0.212669		9.20542	0.069618		9.20667	-0.44632
				9.20853	-0.50211		9.21312	0.209808		9.21208	0.063419		9.21333	-0.44537
				9.2152	-0.50211		9.21978	0.205994		9.21875	0.059128		9.22	-0.44346
				9.22187	-0.50163		9.22645	0.201702		9.22542	0.05722		9.22667	-0.4425
				9.22853	-0.49973		9.23312	0.196934		9.23208	0.056267		9.23333	-0.4425
				9.2352	-0.49734		9.23978	0.193119		9.23875	0.054359		9.24	-0.44441
				9.24187	-0.49686		9.24645	0.191212		9.24542	0.052452		9.24667	-0.44632
				9.24853	-0.49877		9.25312	0.189781		9.25208	0.049591		9.25333	-0.44727
				9.2552	-0.50068		9.25978	0.188351		9.25875	0.047207		9.26	-0.44775
				9.26187	-0.50259		9.26645	0.186443		9.26542	0.044823		9.26667	-0.44918
				9.26853	-0.50402		9.27312	0.183582		9.27208	0.043869		9.27333	-0.45109
				9.2752	-0.50497		9.27978	0.180244		9.27875	0.043869		9.28	-0.45204
				9.28187	-0.50449		9.28645	0.175953		9.28542	0.044823		9.28667	-0.453
				9.28853	-0.50354		9.29312	0.171661		9.29208	0.044823		9.29333	-0.45443
				9.2952	-0.50259		9.29978	0.167847		9.29875	0.044823		9.3	-0.45586
				9.30187	-0.50163		9.30645	0.164986		9.30542	0.0453		9.30667	-0.45633
				9.30853	-0.50116		9.31312	0.160694		9.31208	0.0453		9.31333	-0.45538
				9.3152	-0.50116		9.31978	0.154972		9.31875	0.045776		9.32	-0.45586
				9.32187	-0.50259		9.32645	0.14925		9.32542	0.045776		9.32667	-0.45633
				9.32853	-0.50259		9.33312	0.144005		9.33208	0.045776		9.33333	-0.45729
				9.3352	-0.50163		9.33978	0.139713		9.33875	0.044346		9.34	-0.45681
				9.34187	-0.50116		9.34645	0.136375		9.34542	0.043392		9.34667	-0.45681
				9.34853	-0.50163		9.35312	0.133991		9.35208	0.043392		9.35333	-0.45729
				9.3552	-0.50306		9.35978	0.132561		9.35875	0.044346		9.36	-0.45824
				9.36187	-0.50306		9.36645	0.131607		9.36542	0.044823		9.36667	-0.45967
				9.36853	-0.50259		9.37312	0.129223		9.37208	0.044823		9.37333	-0.46158
				9.3752	-0.50163		9.37978	0.126362		9.37875	0.0453		9.38	-0.46349
				9.38187	-0.50116		9.38645	0.123024		9.38542	0.045776		9.38667	-0.46539
				9.38853	-0.50116		9.39312	0.118732		9.39208	0.044346		9.39333	-0.4673
				9.3952	-0.50068		9.39978	0.114918		9.39875	0.041485		9.4	-0.4673
				9.40187	-0.5002		9.40645	0.11158		9.40542	0.038147		9.40667	-0.4673
				9.40853	-0.5002		9.41312	0.108242		9.41208	0.034809		9.41333	-0.46778
				9.4152	-0.50211		9.41978	0.105858		9.41875	0.032902		9.42	-0.46873
				9.42187	-0.50354		9.42645	0.103474		9.42542	0.031471		9.42667	-0.47016
				9.42853	-0.50449		9.43312	0.099659		9.43208	0.032425		9.43333	-0.47159
				9.4352	-0.50402		9.43978	0.096321		9.43875	0.034809		9.44	-0.47398
				9.44187	-0.50402		9.44645	0.092506		9.44542	0.039577		9.44667	-0.47588
				9.44853	-0.50449		9.45312	0.088215		9.45208	0.044823		9.45333	-0.47731
				9.4552	-0.50545		9.45978	0.08297		9.45875	0.049591		9.46	-0.47779
				9.46187	-0.5064		9.46645	0.078201		9.46542	0.051498		9.46667	-0.47922
				9.46853	-0.5064		9.47312	0.074387		9.47208	0.051022		9.47333	-0.48065
				9.4752	-0.5064		9.47978	0.069618		9.47875	0.049114		9.48	-0.48304
				9.48187	-0.5064		9.48645	0.064373		9.48542	0.046253		9.48667	-0.48637
				9.48853	-0.5064		9.49312	0.059128		9.49208	0.043392		9.49333	-0.49162
				9.4952	-0.50592		9.49978	0.054836		9.49875	0.041008		9.5	-0.49686
				9.50187	-0.50592		9.50645	0.050068		9.50542	0.040531		9.50667	-0.50068
				9.50853	-0.50783		9.51312	0.045776		9.51208	0.040531		9.51333	-0.50449
				9.5152	-0.51069		9.51978	0.041485		9.51875	0.042439		9.52	-0.50879
				9.52187	-0.51498		9.52645	0.036716		9.52542	0.044823		9.52667	-0.51308
				9.52853	-0.52023		9.53312	0.031948		9.53208	0.04673		9.53333	-0.51498
				9.5352	-0.52547		9.53978	0.028133		9.53875	0.047207		9.54	-0.51594
				9.54187	-0.53024		9.54645	0.026703		9.54542	0.045776		9.54667	-0.5188
				9.54853	-0.53406		9.55312	0.026703		9.55208	0.043392		9.55333	-0.52261
				9.5552	-0.53787		9.55978	0.026703		9.55875	0.041008		9.56	-0.525
				9.56187	-0.54121		9.56645	0.02718		9.56542	0.039101		9.56667	-0.52595
				9.56853	-0.54407		9.57312	0.027657		9.57208	0.03767		9.57333	-0.52786
				9.5752	-0.54598		9.57978	0.026703		9.57875	0.036716		9.58	-0.5312
				9.58187	-0.54741		9.58645	0.024796		9.58542	0.03624		9.58667	-0.53453
				9.58853	-0.54789		9.59312	0.021458		9.59208	0.035763		9.59333	-0.53596
				9.5952	-0.54932		9.59978	0.018597		9.59875	0.034809		9.6	-0.53453
				9.60187	-0.55265		9.60645	0.015259		9.60542	0.032425		9.60667	-0.5331
				9.60853	-0.55599		9.61312	0.012398		9.61208	0.030041		9.61333	-0.53167
				9.6152	-0.55933		9.61978	0.009537		9.61875	0.02861		9.62	-0.52929
				9.62187	-0.56171		9.62645	0.006676		9.62542	0.028133		9.62667	-0.52452
				9.62853	-0.56505		9.63312	0.004292		9.63208	0.027657		9.63333	-0.51975
				9.6352	-0.56744		9.63978	0.003338		9.63875	0.026703		9.64	-0.5188
				9.64187	-0.56839		9.64645	0.003338		9.64542	0.026226		9.64667	-0.52118
				9.64853	-0.56839		9.65312	0.004768		9.65208	0.025272		9.65333	-0.52452
				9.6552	-0.56887		9.65978	0.006199		9.65875	0.024319		9.66	-0.52786
				9.66187	-0.5703		9.66645	0.007629		9.66542	0.021935		9.66667	-0.53215
				9.66853	-0.56982		9.67312	0.007629		9.67208	0.018597		9.67333	-0.53692
				9.6752	-0.56791		9.67978	0.006676		9.67875	0.014782		9.68	-0.54026
				9.68187	-0.56601		9.68645	0.005722		9.68542	0.012398		9.68667	-0.54169
				9.68853	-0.56505		9.69312	0.004768		9.69208	0.01049		9.69333	-0.54312
				9.6952	-0.56505		9.69978	0.004768		9.69875	0.008583		9.7	-0.54455
				9.70187	-0.56505		9.70645	0.004292		9.70542	0.007629		9.70667	-0.54598
				9.70853	-0.56601		9.71312	0.002861		9.71208	0.007629		9.71333	-0.54741
				9.7152	-0.56887		9.71978	0.000954		9.71875	0.007629		9.72	-0.54884
				9.72187	-0.5722		9.72645	-0.00191		9.72542	0.005722		9.72667	-0.54789
				9.72853	-0.57459		9.73312	-0.00429		9.73208	0.002384		9.73333	-0.54455
				9.7352	-0.57554		9.73978	-0.00715		9.73875	-0.00048		9.74	-0.54169
				9.74187	-0.57459		9.74645	-0.00906		9.74542	-0.00286		9.74667	-0.5393
				9.74853	-0.57411		9.75312	-0.00954		9.75208	-0.00477		9.75333	-0.5374
				9.7552	-0.57411		9.75978	-0.00811		9.75875	-0.0062		9.76	-0.53549
				9.76187	-0.57411		9.76645	-0.00715		9.76542	-0.0062		9.76667	-0.53358
				9.76853	-0.57459		9.77312	-0.00858		9.77208	-0.00572		9.77333	-0.53263
				9.7752	-0.57459		9.77978	-0.01049		9.77875	-0.00668		9.78	-0.53215
				9.78187	-0.57459		9.78645	-0.0124		9.78542	-0.00811		9.78667	-0.53024
				9.78853	-0.57554		9.79312	-0.01383		9.79208	-0.01049		9.79333	-0.52786
				9.7952	-0.57554		9.79978	-0.01526		9.79875	-0.0124		9.8	-0.52547
				9.80187	-0.57507		9.80645	-0.01669		9.80542	-0.01478		9.80667	-0.52357
				9.80853	-0.57411		9.81312	-0.01764		9.81208	-0.01621		9.81333	-0.52261
				9.8152	-0.57459		9.81978	-0.01764		9.81875	-0.01621		9.82	-0.52309
				9.82187	-0.57459		9.82645	-0.01812		9.82542	-0.01478		9.82667	-0.52547
				9.82853	-0.57268		9.83312	-0.01955		9.83208	-0.01287		9.83333	-0.52929
				9.8352	-0.5703		9.83978	-0.02146		9.83875	-0.01097		9.84	-0.53358
				9.84187	-0.56887		9.84645	-0.02289		9.84542	-0.00954		9.84667	-0.53835
				9.84853	-0.56887		9.85312	-0.02289		9.85208	-0.00811		9.85333	-0.54121
				9.8552	-0.56982		9.85978	-0.02289		9.85875	-0.0062		9.86	-0.54216
				9.86187	-0.5722		9.86645	-0.02337		9.86542	-0.00572		9.86667	-0.54169
				9.86853	-0.57554		9.87312	-0.02432		9.87208	-0.00715		9.87333	-0.54073
				9.8752	-0.57983		9.87978	-0.02527		9.87875	-0.00906		9.88	-0.54026
				9.88187	-0.58222		9.88645	-0.0267		9.88542	-0.0124		9.88667	-0.53978
				9.88853	-0.58222		9.89312	-0.02766		9.89208	-0.01621		9.89333	-0.5393
				9.8952	-0.58079		9.89978	-0.02766		9.89875	-0.01907		9.9	-0.53835
				9.90187	-0.57936		9.90645	-0.02766		9.90542	-0.01955		9.90667	-0.53787
				9.90853	-0.57793		9.91312	-0.02861		9.91208	-0.01812		9.91333	-0.53692
				9.9152	-0.57507		9.91978	-0.02956		9.91875	-0.01574		9.92	-0.53501
				9.92187	-0.5722		9.92645	-0.02956		9.92542	-0.0124		9.92667	-0.53167
				9.92853	-0.56982		9.93312	-0.02956		9.93208	-0.00906		9.93333	-0.52929
				9.9352	-0.56887		9.93978	-0.03099		9.93875	-0.00715		9.94	-0.52738
				9.94187	-0.56791		9.94645	-0.0329		9.94542	-0.00668		9.94667	-0.525
				9.94853	-0.56744		9.95312	-0.03386		9.95208	-0.00763		9.95333	-0.52261
				9.9552	-0.56791		9.95978	-0.03433		9.95875	-0.00906		9.96	-0.52118
				9.96187	-0.56887		9.96645	-0.03576		9.96542	-0.01001		9.96667	-0.52214
				9.96853	-0.5703		9.97312	-0.03815		9.97208	-0.01001		9.97333	-0.52452
				9.9752	-0.57077		9.97978	-0.04148		9.97875	-0.01001		9.98	-0.52643
				9.98187	-0.57077		9.98645	-0.04435		9.98542	-0.00954		9.98667	-0.52881
				9.98853	-0.5703		9.99312	-0.04768		9.99208	-0.00763		9.99333	-0.53167
				9.9952	-0.56982		9.99978	-0.0515		9.99875	-0.00525		10	-0.53406
				10.0019	-0.56982		10.0064	-0.05436		10.0054	-0.00286		10.0067	-0.53501
				10.0085	-0.56982		10.0131	-0.05531		10.0121	-0.00143		10.0133	-0.53549
				10.0152	-0.5703		10.0198	-0.05579		10.0188	0.000477		10.02	-0.53549
				10.0219	-0.57125		10.0265	-0.05531		10.0254	0.002861		10.0267	-0.53406
				10.0285	-0.57173		10.0331	-0.05579		10.0321	0.006676		10.0333	-0.5312
				10.0352	-0.57125		10.0398	-0.05627		10.0388	0.01049		10.04	-0.52929
				10.0419	-0.5703		10.0465	-0.05817		10.0454	0.013351		10.0467	-0.52834
				10.0485	-0.56839		10.0531	-0.06151		10.0521	0.014782		10.0533	-0.52786
				10.0552	-0.56458		10.0598	-0.06485		10.0587	0.014305		10.06	-0.52595
				10.0619	-0.56028		10.0664	-0.06628		10.0654	0.012875		10.0667	-0.52404
				10.0685	-0.55647		10.0731	-0.06628		10.0721	0.010014		10.0733	-0.52261
				10.0752	-0.55361		10.0798	-0.06533		10.0787	0.007153		10.08	-0.52071
				10.0819	-0.54884		10.0864	-0.06437		10.0854	0.005722		10.0867	-0.5188
				10.0885	-0.54312		10.0931	-0.0639		10.0921	0.007153		10.0933	-0.51689
				10.0952	-0.53787		10.0998	-0.06342		10.0988	0.010014		10.1	-0.51641
				10.1019	-0.5331		10.1065	-0.06485		10.1054	0.012875		10.1067	-0.51689
				10.1085	-0.52738		10.1131	-0.06723		10.1121	0.015736		10.1133	-0.51737
				10.1152	-0.51975		10.1198	-0.07105		10.1188	0.01812		10.12	-0.51832
				10.1219	-0.51117		10.1265	-0.07343		10.1254	0.019073		10.1267	-0.51928
				10.1285	-0.50211		10.1331	-0.07534		10.1321	0.01955		10.1333	-0.51928
				10.1352	-0.494		10.1398	-0.07582		10.1387	0.019073		10.14	-0.51785
				10.1419	-0.48494		10.1464	-0.07582		10.1454	0.018597		10.1467	-0.51689
				10.1485	-0.47588		10.1531	-0.07486		10.1521	0.018597		10.1533	-0.51594
				10.1552	-0.46825		10.1598	-0.07248		10.1587	0.020504		10.16	-0.51498
				10.1619	-0.46301		10.1664	-0.0701		10.1654	0.023365		10.1667	-0.51355
				10.1685	-0.45967		10.1731	-0.06819		10.1721	0.026226		10.1733	-0.51355
				10.1752	-0.45633		10.1798	-0.06771		10.1788	0.029564		10.18	-0.51546
				10.1819	-0.45347		10.1865	-0.06914		10.1854	0.031948		10.1867	-0.51832
				10.1885	-0.45156		10.1931	-0.07105		10.1921	0.033379		10.1933	-0.51928
				10.1952	-0.45156		10.1998	-0.07296		10.1988	0.034809		10.2	-0.51975
				10.2019	-0.45395		10.2065	-0.07343		10.2054	0.035763		10.2067	-0.51975
				10.2085	-0.45776		10.2131	-0.07391		10.2121	0.03767		10.2133	-0.51975
				10.2152	-0.46444		10.2198	-0.07296		10.2188	0.040054		10.22	-0.52023
				10.2219	-0.47255		10.2264	-0.072		10.2254	0.044346		10.2267	-0.52166
				10.2285	-0.48161		10.2331	-0.07105		10.2321	0.050545		10.2333	-0.52595
				10.2352	-0.48971		10.2398	-0.07057		10.2387	0.056744		10.24	-0.53167
				10.2419	-0.49639		10.2464	-0.07105		10.2454	0.062943		10.2467	-0.5374
				10.2485	-0.50211		10.2531	-0.072		10.2521	0.068665		10.2533	-0.54169
				10.2552	-0.50783		10.2598	-0.07296		10.2587	0.07391		10.26	-0.54407
				10.2619	-0.51641		10.2665	-0.07439		10.2654	0.077724		10.2667	-0.54359
				10.2685	-0.52643		10.2731	-0.07582		10.2721	0.080585		10.2733	-0.54169
				10.2752	-0.53644		10.2798	-0.07725		10.2788	0.082493		10.28	-0.54026
				10.2819	-0.54502		10.2865	-0.0782		10.2854	0.08297		10.2867	-0.53978
				10.2885	-0.5517		10.2931	-0.07915		10.2921	0.08297		10.2933	-0.54026
				10.2952	-0.55742		10.2998	-0.07963		10.2988	0.082016		10.3	-0.54026
				10.3019	-0.56124		10.3064	-0.07868		10.3054	0.081062		10.3067	-0.54073
				10.3085	-0.5641		10.3131	-0.07772		10.3121	0.080109		10.3133	-0.54264
				10.3152	-0.56648		10.3198	-0.0782		10.3187	0.079155		10.32	-0.54455
				10.3219	-0.56982		10.3264	-0.08011		10.3254	0.078201		10.3267	-0.54598
				10.3285	-0.57316		10.3331	-0.08249		10.3321	0.076771		10.3333	-0.54598
				10.3352	-0.57554		10.3398	-0.08488		10.3387	0.073433		10.34	-0.54646
				10.3419	-0.5765		10.3465	-0.08726		10.3454	0.070095		10.3467	-0.54741
				10.3485	-0.57554		10.3531	-0.08869		10.3521	0.065804		10.3533	-0.54789
				10.3552	-0.57459		10.3598	-0.08917		10.3588	0.060558		10.36	-0.54836
				10.3619	-0.57316		10.3665	-0.08821		10.3654	0.055313		10.3667	-0.54979
				10.3685	-0.57268		10.3731	-0.08583		10.3721	0.050545		10.3733	-0.55218
				10.3752	-0.57268		10.3798	-0.08297		10.3788	0.047207		10.38	-0.55599
				10.3819	-0.57364		10.3864	-0.08059		10.3854	0.043869		10.3867	-0.55838
				10.3885	-0.57554		10.3931	-0.08011		10.3921	0.041008		10.3933	-0.55933
				10.3952	-0.5784		10.3998	-0.07963		10.3987	0.039101		10.4	-0.55885
				10.4019	-0.58174		10.4064	-0.08011		10.4054	0.03767		10.4067	-0.55742
				10.4085	-0.58556		10.4131	-0.08154		10.4121	0.035763		10.4133	-0.55504
				10.4152	-0.58889		10.4198	-0.08297		10.4187	0.034332		10.42	-0.55265
				10.4219	-0.59128		10.4265	-0.08392		10.4254	0.032902		10.4267	-0.55218
				10.4285	-0.5908		10.4331	-0.08345		10.4321	0.032425		10.4333	-0.55361
				10.4352	-0.58937		10.4398	-0.08154		10.4388	0.031471		10.44	-0.55647
				10.4419	-0.58794		10.4465	-0.07772		10.4454	0.030518		10.4467	-0.56076
				10.4485	-0.58556		10.4531	-0.07391		10.4521	0.030518		10.4533	-0.56362
				10.4552	-0.58317		10.4598	-0.07153		10.4588	0.030994		10.46	-0.56553
				10.4619	-0.58222		10.4665	-0.0701		10.4654	0.030994		10.4667	-0.56553
				10.4685	-0.58317		10.4731	-0.06866		10.4721	0.030518		10.4733	-0.5641
				10.4752	-0.58556		10.4798	-0.06819		10.4787	0.030041		10.48	-0.56171
				10.4819	-0.58699		10.4864	-0.06723		10.4854	0.030041		10.4867	-0.55933
				10.4885	-0.58937		10.4931	-0.06676		10.4921	0.030994		10.4933	-0.55838
				10.4952	-0.59366		10.4998	-0.06628		10.4987	0.032425		10.5	-0.55933
				10.5019	-0.59843		10.5064	-0.06676		10.5054	0.033379		10.5067	-0.56076
				10.5085	-0.60081		10.5131	-0.06676		10.5121	0.034332		10.5133	-0.56314
				10.5152	-0.60129		10.5198	-0.06676		10.5188	0.034809		10.52	-0.56553
				10.5219	-0.60129		10.5265	-0.06771		10.5254	0.033379		10.5267	-0.56601
				10.5285	-0.60034		10.5331	-0.06914		10.5321	0.030518		10.5333	-0.56505
				10.5352	-0.59843		10.5398	-0.07105		10.5388	0.02718		10.54	-0.56314
				10.5419	-0.59605		10.5465	-0.072		10.5454	0.024796		10.5467	-0.56314
				10.5485	-0.59462		10.5531	-0.072		10.5521	0.023842		10.5533	-0.56314
				10.5552	-0.59462		10.5598	-0.072		10.5587	0.024319		10.56	-0.56267
				10.5619	-0.59605		10.5664	-0.07248		10.5654	0.025749		10.5667	-0.56314
				10.5685	-0.59795		10.5731	-0.07248		10.5721	0.02861		10.5733	-0.5641
				10.5752	-0.59843		10.5798	-0.07343		10.5787	0.032902		10.58	-0.5641
				10.5819	-0.59795		10.5864	-0.07486		10.5854	0.03767		10.5867	-0.56267
				10.5885	-0.59795		10.5931	-0.07915		10.5921	0.041962		10.5933	-0.56124
				10.5952	-0.59938		10.5998	-0.08488		10.5988	0.044823		10.6	-0.56171
				10.6019	-0.60034		10.6065	-0.08917		10.6054	0.0453		10.6067	-0.56076
				10.6085	-0.60129		10.6131	-0.09155		10.6121	0.042915		10.6133	-0.55981
				10.6152	-0.60225		10.6198	-0.09203		10.6188	0.040054		10.62	-0.55981
				10.6219	-0.6032		10.6265	-0.09108		10.6254	0.036716		10.6267	-0.56028
				10.6285	-0.60415		10.6331	-0.08869		10.6321	0.034332		10.6333	-0.56028
				10.6352	-0.60463		10.6398	-0.08488		10.6387	0.032902		10.64	-0.55981
				10.6419	-0.6032		10.6464	-0.08202		10.6454	0.032902		10.6467	-0.56124
				10.6485	-0.60081		10.6531	-0.08202		10.6521	0.034809		10.6533	-0.56362
				10.6552	-0.59843		10.6598	-0.08392		10.6587	0.035763		10.66	-0.56601
				10.6619	-0.59795		10.6664	-0.08678		10.6654	0.034809		10.6667	-0.56744
				10.6685	-0.59938		10.6731	-0.09012		10.6721	0.033855		10.6733	-0.56839
				10.6752	-0.60177		10.6798	-0.09346		10.6788	0.033855		10.68	-0.56839
				10.6819	-0.60415		10.6865	-0.09537		10.6854	0.035286		10.6867	-0.56744
				10.6885	-0.60606		10.6931	-0.09632		10.6921	0.036716		10.6933	-0.56601
				10.6952	-0.60701		10.6998	-0.09537		10.6988	0.039101		10.7	-0.56267
				10.7019	-0.60701		10.7065	-0.09441		10.7054	0.041485		10.7067	-0.55933
				10.7085	-0.60606		10.7131	-0.09298		10.7121	0.043869		10.7133	-0.55647
				10.7152	-0.60558		10.7198	-0.09394		10.7188	0.044346		10.72	-0.55408
				10.7219	-0.60463		10.7264	-0.09584		10.7254	0.043392		10.7267	-0.55265
				10.7285	-0.60368		10.7331	-0.09823		10.7321	0.041962		10.7333	-0.55313
				10.7352	-0.60272		10.7398	-0.09966		10.7387	0.041008		10.74	-0.55552
				10.7419	-0.60225		10.7464	-0.10109		10.7454	0.040054		10.7467	-0.55742
				10.7485	-0.60177		10.7531	-0.10061		10.7521	0.039101		10.7533	-0.55933
				10.7552	-0.60225		10.7598	-0.09775		10.7587	0.038147		10.76	-0.56124
				10.7619	-0.60272		10.7665	-0.09346		10.7654	0.038147		10.7667	-0.56314
				10.7685	-0.60415		10.7731	-0.0906		10.7721	0.039101		10.7733	-0.56553
				10.7752	-0.60511		10.7798	-0.09012		10.7788	0.040054		10.78	-0.56791
				10.7819	-0.60558		10.7865	-0.09155		10.7854	0.040531		10.7867	-0.56934
				10.7885	-0.60511		10.7931	-0.09489		10.7921	0.041008		10.7933	-0.56887
				10.7952	-0.60463		10.7998	-0.09918		10.7988	0.042439		10.8	-0.56648
				10.8019	-0.60606		10.8064	-0.103		10.8054	0.043392		10.8067	-0.56314
				10.8085	-0.60844		10.8131	-0.10538		10.8121	0.043869		10.8133	-0.55981
				10.8152	-0.61035		10.8198	-0.10538		10.8187	0.044823		10.82	-0.55695
				10.8219	-0.61226		10.8264	-0.10395		10.8254	0.045776		10.8267	-0.55504
				10.8285	-0.61274		10.8331	-0.09918		10.8321	0.046253		10.8333	-0.55552
				10.8352	-0.61178		10.8398	-0.09394		10.8387	0.047207		10.84	-0.55885
				10.8419	-0.6094		10.8465	-0.08965		10.8454	0.047684		10.8467	-0.56171
				10.8485	-0.60654		10.8531	-0.08631		10.8521	0.047207		10.8533	-0.56362
				10.8552	-0.60463		10.8598	-0.08535		10.8588	0.045776		10.86	-0.56314
				10.8619	-0.60415		10.8665	-0.08631		10.8654	0.043392		10.8667	-0.56267
				10.8685	-0.60415		10.8731	-0.08917		10.8721	0.041008		10.8733	-0.56267
				10.8752	-0.60463		10.8798	-0.09298		10.8788	0.040054		10.88	-0.56267
				10.8819	-0.60511		10.8864	-0.09632		10.8854	0.038624		10.8867	-0.56267
				10.8885	-0.60415		10.8931	-0.09871		10.8921	0.03767		10.8933	-0.5641
				10.8952	-0.60368		10.8998	-0.09918		10.8987	0.036716		10.9	-0.56744
				10.9019	-0.6032		10.9064	-0.09727		10.9054	0.03767		10.9067	-0.57125
				10.9085	-0.60272		10.9131	-0.09394		10.9121	0.040054		10.9133	-0.57268
				10.9152	-0.60272		10.9198	-0.09251		10.9187	0.041962		10.92	-0.5722
				10.9219	-0.60368		10.9265	-0.09203		10.9254	0.042915		10.9267	-0.57173
				10.9285	-0.60511		10.9331	-0.09251		10.9321	0.043392		10.9333	-0.57077
				10.9352	-0.60606		10.9398	-0.09394		10.9388	0.043869		10.94	-0.56839
				10.9419	-0.60558		10.9465	-0.09775		10.9454	0.043392		10.9467	-0.56362
				10.9485	-0.60368		10.9531	-0.10252		10.9521	0.041962		10.9533	-0.55885
				10.9552	-0.60225		10.9598	-0.1049		10.9588	0.040054		10.96	-0.55552
				10.9619	-0.60129		10.9665	-0.1049		10.9654	0.039101		10.9667	-0.55218
				10.9685	-0.59986		10.9731	-0.10395		10.9721	0.039577		10.9733	-0.54741
				10.9752	-0.59891		10.9798	-0.103		10.9787	0.040054		10.98	-0.54169
				10.9819	-0.59986		10.9864	-0.10061		10.9854	0.042439		10.9867	-0.53501
				10.9885	-0.60225		10.9931	-0.09823		10.9921	0.044823		10.9933	-0.52691
				10.9952	-0.60463		10.9998	-0.0968		10.9987	0.04673		11	-0.51546
				11.0019	-0.60654		11.0064	-0.09823		11.0054	0.046253		11.0067	-0.49877
				11.0085	-0.60892		11.0131	-0.10061		11.0121	0.044823		11.0133	-0.47636
				11.0152	-0.61226		11.0198	-0.10347		11.0188	0.043392		11.02	-0.44966
				11.0219	-0.61417		11.0265	-0.10729		11.0254	0.041008		11.0267	-0.41819
				11.0285	-0.61417		11.0331	-0.10967		11.0321	0.038147		11.0333	-0.37956
				11.0352	-0.61035		11.0398	-0.11158		11.0388	0.035763		11.04	-0.33188
				11.0419	-0.60606		11.0465	-0.11301		11.0454	0.03624		11.0467	-0.2737
				11.0485	-0.60225		11.0531	-0.11444		11.0521	0.038147		11.0533	-0.20361
				11.0552	-0.59891		11.0598	-0.11539		11.0587	0.041962		11.06	-0.12016
				11.0619	-0.59652		11.0664	-0.11539		11.0654	0.046253		11.0667	-0.01907
				11.0685	-0.59462		11.0731	-0.11587		11.0721	0.050068		11.0733	0.102043
				11.0752	-0.59414		11.0798	-0.11683		11.0787	0.052929		11.08	0.24271
				11.0819	-0.59366		11.0864	-0.11778		11.0854	0.054836		11.0867	0.404358
				11.0885	-0.59319		11.0931	-0.1173		11.0921	0.056744		11.0933	0.588894
				11.0952	-0.59175		11.0998	-0.11635		11.0988	0.056267		11.1	0.798225
				11.1019	-0.58794		11.1065	-0.11539		11.1054	0.054836		11.1067	1.03378
				11.1085	-0.58317		11.1131	-0.11444		11.1121	0.052929		11.1133	1.29652
				11.1152	-0.57745		11.1198	-0.11396		11.1188	0.052452		11.12	1.58834
				11.1219	-0.56887		11.1265	-0.11349		11.1254	0.051975		11.1267	1.91212
				11.1285	-0.55742		11.1331	-0.11396		11.1321	0.050545		11.1333	2.26831
				11.1352	-0.54407		11.1398	-0.11587		11.1387	0.050545		11.14	2.65503
				11.1419	-0.53024		11.1464	-0.11969		11.1454	0.051022		11.1467	3.07226
				11.1485	-0.51689		11.1531	-0.12255		11.1521	0.051498		11.1533	3.5181
				11.1552	-0.50163		11.1598	-0.12445		11.1587	0.050068		11.16	3.99065
				11.1619	-0.48304		11.1664	-0.12445		11.1654	0.047684		11.1667	4.48608
				11.1685	-0.46158		11.1731	-0.12445		11.1721	0.04673		11.1733	4.99964
				11.1752	-0.43678		11.1798	-0.12398		11.1788	0.046253		11.18	5.52988
				11.1819	-0.40865		11.1865	-0.1235		11.1854	0.047207		11.1867	6.07204
				11.1885	-0.37479		11.1931	-0.12398		11.1921	0.048637		11.1933	6.62184
				11.1952	-0.33712		11.1998	-0.12636		11.1988	0.051975		11.2	7.17258
				11.2019	-0.29755		11.2065	-0.13018		11.2054	0.056267		11.2067	7.71952
				11.2085	-0.25606		11.2131	-0.13399		11.2121	0.060558		11.2133	8.25643
				11.2152	-0.20981		11.2198	-0.13638		11.2188	0.063419		11.22	8.77714
				11.2219	-0.15831		11.2264	-0.13733		11.2254	0.065804		11.2267	9.27782
				11.2285	-0.103		11.2331	-0.13685		11.2321	0.068665		11.2333	9.75275
				11.2352	-0.04435		11.2398	-0.1359		11.2387	0.072002		11.24	10.1991
				11.2419	0.017643		11.2464	-0.13399		11.2454	0.07534		11.2467	10.6111
				11.2485	0.085354		11.2531	-0.13161		11.2521	0.079155		11.2533	10.9873
				11.2552	0.155926		11.2598	-0.1297		11.2587	0.083923		11.26	11.323
				11.2619	0.227451		11.2665	-0.12922		11.2654	0.089645		11.2667	11.6172
				11.2685	0.299454		11.2731	-0.1297		11.2721	0.095844		11.2733	11.868
				11.2752	0.371456		11.2798	-0.13113		11.2788	0.102997		11.28	12.073
				11.2819	0.444412		11.2865	-0.13351		11.2854	0.112534		11.2867	12.2333
				11.2885	0.516891		11.2931	-0.13685		11.2921	0.124931		11.2933	12.3491
				11.2952	0.589848		11.2998	-0.14019		11.2988	0.141144		11.3	12.4221
				11.3019	0.662327		11.3064	-0.14162		11.3054	0.160217		11.3067	12.4526
				11.3085	0.734806		11.3131	-0.14162		11.3121	0.183105		11.3133	12.4431
				11.3152	0.806332		11.3198	-0.1421		11.3187	0.209332		11.32	12.3954
				11.3219	0.876904		11.3264	-0.14257		11.3254	0.237465		11.3267	12.3134
				11.3285	0.944138		11.3331	-0.14305		11.3321	0.266552		11.3333	12.2004
				11.3352	1.00613		11.3398	-0.14305		11.3387	0.29707		11.34	12.0573
				11.3419	1.06335		11.3465	-0.14353		11.3454	0.329494		11.3467	11.8875
				11.3485	1.11723		11.3531	-0.14448		11.3521	0.36478		11.3533	11.6921
				11.3552	1.16682		11.3598	-0.14448		11.3588	0.403881		11.36	11.4732
				11.3619	1.21069		11.3665	-0.144		11.3654	0.448704		11.3667	11.2328
				11.3685	1.24979		11.3731	-0.14353		11.3721	0.497341		11.3733	10.9734
				11.3752	1.28412		11.3798	-0.14353		11.3788	0.550747		11.38	10.6983
				11.3819	1.31321		11.3864	-0.144		11.3854	0.607967		11.3867	10.4108
				11.3885	1.33514		11.3931	-0.14448		11.3921	0.668526		11.3933	10.1142
				11.3952	1.3504		11.3998	-0.14496		11.3987	0.730038		11.4	9.81045
				11.4019	1.35899		11.4064	-0.14496		11.4054	0.792027		11.4067	9.50384
				11.4085	1.3628		11.4131	-0.14448		11.4121	0.855446		11.4133	9.1939
				11.4152	1.36185		11.4198	-0.14353		11.4187	0.920773		11.42	8.88157
				11.4219	1.3566		11.4265	-0.14257		11.4254	0.987053		11.4267	8.56829
				11.4285	1.34706		11.4331	-0.14257		11.4321	1.05429		11.4333	8.25548
				11.4352	1.33467		11.4398	-0.14257		11.4388	1.12343		11.44	7.94458
				11.4419	1.31798		11.4465	-0.14305		11.4454	1.19352		11.4467	7.63607
				11.4485	1.29604		11.4531	-0.14162		11.4521	1.26314		11.4533	7.33185
				11.4552	1.26839		11.4598	-0.14114		11.4588	1.33324		11.46	7.03383
				11.4619	1.23644		11.4665	-0.14019		11.4654	1.40238		11.4667	6.74152
				11.4685	1.20211		11.4731	-0.13828		11.4721	1.46818		11.4733	6.4559
				11.4752	1.16491		11.4798	-0.13351		11.4787	1.52874		11.48	6.17743
				11.4819	1.12438		11.4864	-0.12779		11.4854	1.58596		11.4867	5.90658
				11.4885	1.08099		11.4931	-0.12064		11.4921	1.64032		11.4933	5.64384
				11.4952	1.03807		11.4998	-0.11301		11.4987	1.69134		11.5	5.38874
				11.5019	0.995159		11.5064	-0.10395		11.5054	1.73903		11.5067	5.14269
				11.5085	0.950813		11.5131	-0.09441		11.5121	1.78194		11.5133	4.90475
				11.5152	0.90456		11.5198	-0.08392		11.5188	1.82152		11.52	4.67539
				11.5219	0.858307		11.5265	-0.07296		11.5254	1.8568		11.5267	4.45414
				11.5285	0.813007		11.5331	-0.06151		11.5321	1.88732		11.5333	4.24099
				11.5352	0.767231		11.5398	-0.04864		11.5388	1.91164		11.54	4.03643
				11.5419	0.720978		11.5465	-0.03004		11.5454	1.93024		11.5467	3.83997
				11.5485	0.674725		11.5531	-0.00477		11.5521	1.9455		11.5533	3.65162
				11.5552	0.629425		11.5598	0.02718		11.5587	1.95646		11.56	3.4709
				11.5619	0.585556		11.5664	0.065327		11.5654	1.96314		11.5667	3.29685
				11.5685	0.542164		11.5731	0.112534		11.5721	1.96457		11.5733	3.12996
				11.5752	0.499725		11.5798	0.170708		11.5787	1.96219		11.58	2.96879
				11.5819	0.458241		11.5864	0.238895		11.5854	1.95646		11.5867	2.81334
				11.5885	0.416756		11.5931	0.315666		11.5921	1.94597		11.5933	2.66361
				11.5952	0.376701		11.5998	0.402451		11.5988	1.93071		11.6	2.52199
				11.6019	0.337124		11.6065	0.501633		11.6054	1.91069		11.6067	2.38895
				11.6085	0.298977		11.6131	0.618458		11.6121	1.88685		11.6133	2.26307
				11.6152	0.26226		11.6198	0.751495		11.6188	1.85919		11.62	2.14434
				11.6219	0.226974		11.6265	0.902176		11.6254	1.82819		11.6267	2.03133
				11.6285	0.192165		11.6331	1.07098		11.6321	1.79434		11.6333	1.92308
				11.6352	0.157833		11.6398	1.26123		11.6387	1.7581		11.64	1.8177
				11.6419	0.124454		11.6464	1.4739		11.6454	1.71995		11.6467	1.71566
				11.6485	0.092506		11.6531	1.70946		11.6521	1.68085		11.6533	1.61838
				11.6552	0.060558		11.6598	1.96886		11.6587	1.64223		11.66	1.52683
				11.6619	0.029564		11.6664	2.25401		11.6654	1.60313		11.6667	1.441
				11.6685	0.000954		11.6731	2.56777		11.6721	1.56355		11.6733	1.36089
				11.6752	-0.0248		11.6798	2.91014		11.6788	1.52254		11.68	1.28555
				11.6819	-0.04816		11.6865	3.28016		11.6854	1.48058		11.6867	1.2145
				11.6885	-0.07105		11.6931	3.67737		11.6921	1.43862		11.6933	1.14584
				11.6952	-0.09251		11.6998	4.10128		11.6988	1.39666		11.7	1.07956
				11.7019	-0.11158		11.7065	4.54855		11.7054	1.35374		11.7067	1.01423
				11.7085	-0.1297		11.7131	5.0149		11.7121	1.31082		11.7133	0.952721
				11.7152	-0.14782		11.7198	5.49936		11.7188	1.26791		11.72	0.895023
				11.7219	-0.16642		11.7264	6.00147		11.7254	1.22547		11.7267	0.840187
				11.7285	-0.18358		11.7331	6.51836		11.7321	1.18399		11.7333	0.787258
				11.7352	-0.20027		11.7398	7.04575		11.7387	1.14155		11.74	0.736713
				11.7419	-0.21791		11.7464	7.5798		11.7454	1.10006		11.7467	0.689983
				11.7485	-0.23556		11.7531	8.11958		11.7521	1.06049		11.7533	0.644684
				11.7552	-0.25225		11.7598	8.66127		11.7587	1.02425		11.76	0.600338
				11.7619	-0.26751		11.7665	9.19867		11.7654	0.98896		11.7667	0.557423
				11.7685	-0.28324		11.7731	9.72795		11.7721	0.954151		11.7733	0.518799
				11.7752	-0.29755		11.7798	10.2439		11.7788	0.918865		11.78	0.481606
				11.7819	-0.31042		11.7865	10.7446		11.7854	0.884533		11.7867	0.445366
				11.7885	-0.32234		11.7931	11.2248		11.7921	0.852108		11.7933	0.410557
				11.7952	-0.33331		11.7998	11.682		11.7988	0.82016		11.8	0.378132
				11.8019	-0.34332		11.8064	12.1136		11.8054	0.788689		11.8067	0.346661
				11.8085	-0.35286		11.8131	12.516		11.8121	0.758171		11.8133	0.31662
				11.8152	-0.36287		11.8198	12.8865		11.8187	0.730515		11.82	0.28801
				11.8219	-0.37241		11.8264	13.2246		11.8254	0.703335		11.8267	0.261307
				11.8285	-0.38195		11.8331	13.5303		11.8321	0.675678		11.8333	0.234604
				11.8352	-0.39244		11.8398	13.802		11.8387	0.647068		11.84	0.208855
				11.8419	-0.4034		11.8465	14.0376		11.8454	0.620842		11.8467	0.184059
				11.8485	-0.41342		11.8531	14.236		11.8521	0.597477		11.8533	0.15974
				11.8552	-0.42105		11.8598	14.3971		11.8588	0.576019		11.86	0.136375
				11.8619	-0.42772		11.8665	14.5221		11.8654	0.555515		11.8667	0.114441
				11.8685	-0.4344		11.8731	14.6108		11.8721	0.536442		11.8733	0.09346
				11.8752	-0.4406		11.8798	14.6646		11.8788	0.517845		11.88	0.07391
				11.8819	-0.44584		11.8864	14.6861		11.8854	0.499249		11.8867	0.054836
				11.8885	-0.45109		11.8931	14.678		11.8921	0.480175		11.8933	0.035763
				11.8952	-0.45824		11.8998	14.6422		11.8987	0.461102		11.9	0.017166
				11.9019	-0.46635		11.9064	14.5788		11.9054	0.443935		11.9067	-0.00048
				11.9085	-0.47398		11.9131	14.4877		11.9121	0.4282		11.9133	-0.01669
				11.9152	-0.48018		11.9198	14.3704		11.9187	0.413418		11.92	-0.03147
				11.9219	-0.4859		11.9265	14.2293		11.9254	0.398636		11.9267	-0.0453
				11.9285	-0.49067		11.9331	14.0662		11.9321	0.383377		11.9333	-0.05722
				11.9352	-0.49353		11.9398	13.8812		11.9388	0.367165		11.94	-0.06771
				11.9419	-0.49639		11.9465	13.6781		11.9454	0.351429		11.9467	-0.07772
				11.9485	-0.50068		11.9531	13.4597		11.9521	0.33617		11.9533	-0.08965
				11.9552	-0.50592		11.9598	13.2275		11.9588	0.322819		11.96	-0.10204
				11.9619	-0.51117		11.9665	12.9824		11.9654	0.310421		11.9667	-0.11539
				11.9685	-0.51594		11.9731	12.7258		11.9721	0.299454		11.9733	-0.12922
				11.9752	-0.52023		11.9798	12.4602		11.9787	0.288963		11.98	-0.14353
				11.9819	-0.52309		11.9864	12.1875		11.9854	0.27895		11.9867	-0.15688
				11.9885	-0.52357		11.9931	11.91		11.9921	0.268459		11.9933	-0.16832
				11.9952	-0.52357		11.9998	11.6281		11.9987	0.258923		12	-0.17786
				12.0019	-0.52404		12.0064	11.3411		12.0054	0.249386		12.0067	-0.18597
				12.0085	-0.52547		12.0131	11.0507		12.0121	0.239372		12.0133	-0.19217
				12.0152	-0.52738		12.0198	10.7593		12.0188	0.228882		12.02	-0.19836
				12.0219	-0.52977		12.0265	10.4685		12.0254	0.218391		12.0267	-0.20504
				12.0285	-0.53263		12.0331	10.1781		12.0321	0.209332		12.0333	-0.21315
				12.0352	-0.53549		12.0398	9.88865		12.0388	0.201702		12.04	-0.22221
				12.0419	-0.53883		12.0465	9.60207		12.0454	0.195503		12.0467	-0.23174
				12.0485	-0.54216		12.0531	9.3193		12.0521	0.190735		12.0533	-0.24176
				12.0552	-0.54598		12.0598	9.03988		12.0587	0.18549		12.06	-0.25082
				12.0619	-0.54932		12.0664	8.76379		12.0654	0.180244		12.0667	-0.25797
				12.0685	-0.55218		12.0731	8.49152		12.0721	0.174522		12.0733	-0.26417
				12.0752	-0.55456		12.0798	8.22401		12.0787	0.168324		12.08	-0.26989
				12.0819	-0.55599		12.0864	7.96175		12.0854	0.161171		12.0867	-0.27561
				12.0885	-0.55647		12.0931	7.70569		12.0921	0.155449		12.0933	-0.28229
				12.0952	-0.55695		12.0998	7.45583		12.0988	0.150204		12.1	-0.28992
				12.1019	-0.55695		12.1065	7.21121		12.1054	0.146389		12.1067	-0.29755
				12.1085	-0.5579		12.1131	6.97279		12.1121	0.142574		12.1133	-0.30422
				12.1152	-0.55885		12.1198	6.74057		12.1188	0.138283		12.12	-0.31042
				12.1219	-0.55981		12.1265	6.5136		12.1254	0.133514		12.1267	-0.31567
				12.1285	-0.56076		12.1331	6.29139		12.1321	0.128269		12.1333	-0.32043
				12.1352	-0.56124		12.1398	6.07443		12.1387	0.122547		12.14	-0.32425
				12.1419	-0.56314		12.1464	5.86271		12.1454	0.116825		12.1467	-0.32759
				12.1485	-0.56553		12.1531	5.65672		12.1521	0.110626		12.1533	-0.33045
				12.1552	-0.56791		12.1598	5.45692		12.1587	0.105381		12.16	-0.33379
				12.1619	-0.56982		12.1664	5.26428		12.1654	0.100136		12.1667	-0.3376
				12.1685	-0.5703		12.1731	5.07879		12.1721	0.095367		12.1733	-0.34142
				12.1752	-0.56934		12.1798	4.8995		12.1788	0.091553		12.18	-0.34475
				12.1819	-0.56696		12.1865	4.72546		12.1854	0.088692		12.1867	-0.34857
				12.1885	-0.5641		12.1931	4.55618		12.1921	0.0844		12.1933	-0.35191
				12.1952	-0.56219		12.1998	4.3931		12.1988	0.080109		12.2	-0.35381
				12.2019	-0.56171		12.2065	4.2367		12.2054	0.076294		12.2067	-0.35524
				12.2085	-0.56267		12.2131	4.08697		12.2121	0.072479		12.2133	-0.35715
				12.2152	-0.56648		12.2198	3.94392		12.2188	0.068665		12.22	-0.35954
				12.2219	-0.57173		12.2264	3.80611		12.2254	0.065804		12.2267	-0.36335
				12.2285	-0.57745		12.2331	3.67451		12.2321	0.063896		12.2333	-0.36812
				12.2352	-0.58222		12.2398	3.54719		12.2387	0.061989		12.24	-0.37432
				12.2419	-0.58699		12.2464	3.42369		12.2454	0.059128		12.2467	-0.38099
				12.2485	-0.58985		12.2531	3.30353		12.2521	0.05579		12.2533	-0.38624
				12.2552	-0.58937		12.2598	3.18718		12.2587	0.053406		12.26	-0.39148
				12.2619	-0.58699		12.2665	3.0756		12.2654	0.051022		12.2667	-0.39577
				12.2685	-0.58317		12.2731	2.96736		12.2721	0.048161		12.2733	-0.39864
				12.2752	-0.57983		12.2798	2.86341		12.2788	0.044823		12.28	-0.40007
				12.2819	-0.57745		12.2865	2.76184		12.2854	0.041008		12.2867	-0.4015
				12.2885	-0.57697		12.2931	2.66504		12.2921	0.03767		12.2933	-0.40388
				12.2952	-0.5784		12.2998	2.57301		12.2988	0.033379		12.3	-0.40722
				12.3019	-0.58126		12.3064	2.48528		12.3054	0.030041		12.3067	-0.41103
				12.3085	-0.58365		12.3131	2.40135		12.3121	0.02861		12.3133	-0.41485
				12.3152	-0.5846		12.3198	2.31934		12.3187	0.027657		12.32	-0.41914
				12.3219	-0.58508		12.3264	2.24018		12.3254	0.02718		12.3267	-0.42248
				12.3285	-0.58556		12.3331	2.16198		12.3321	0.02718		12.3333	-0.42343
				12.3352	-0.58699		12.3398	2.08569		12.3387	0.02718		12.34	-0.42343
				12.3419	-0.58842		12.3465	2.01225		12.3454	0.026226		12.3467	-0.42343
				12.3485	-0.58937		12.3531	1.94359		12.3521	0.025749		12.3533	-0.42391
				12.3552	-0.5908		12.3598	1.87922		12.3588	0.025749		12.36	-0.42439
				12.3619	-0.59175		12.3665	1.81913		12.3654	0.026226		12.3667	-0.42534
				12.3685	-0.59223		12.3731	1.76239		12.3721	0.02718		12.3733	-0.42677
				12.3752	-0.59175		12.3798	1.7066		12.3788	0.027657		12.38	-0.42915
				12.3819	-0.5908		12.3864	1.65033		12.3854	0.027657		12.3867	-0.43106
				12.3885	-0.59032		12.3931	1.59502		12.3921	0.026226		12.3933	-0.43344
				12.3952	-0.5908		12.3998	1.54114		12.3987	0.023842		12.4	-0.43583
				12.4019	-0.59175		12.4064	1.48964		12.4054	0.020027		12.4067	-0.44012
				12.4085	-0.59319		12.4131	1.44005		12.4121	0.015736		12.4133	-0.44584
				12.4152	-0.59462		12.4198	1.39332		12.4187	0.012398		12.42	-0.45061
				12.4219	-0.59652		12.4265	1.3504		12.4254	0.010014		12.4267	-0.45347
				12.4285	-0.59891		12.4331	1.3094		12.4321	0.00906		12.4333	-0.45538
				12.4352	-0.60081		12.4398	1.26982		12.4388	0.008583		12.44	-0.45776
				12.4419	-0.60225		12.4465	1.23072		12.4454	0.008106		12.4467	-0.45824
				12.4485	-0.60225		12.4531	1.194		12.4521	0.008106		12.4533	-0.45681
				12.4552	-0.60177		12.4598	1.15776		12.4588	0.008106		12.46	-0.45443
				12.4619	-0.60129		12.4665	1.12152		12.4654	0.006676		12.4667	-0.45204
				12.4685	-0.59986		12.4731	1.08481		12.4721	0.004768		12.4733	-0.45061
				12.4752	-0.59748		12.4798	1.04904		12.4787	0.002384		12.48	-0.45013
				12.4819	-0.59462		12.4864	1.01519		12.4854	-0.00095		12.4867	-0.44966
				12.4885	-0.59271		12.4931	0.982761		12.4921	-0.00381		12.4933	-0.4487
				12.4952	-0.59223		12.4998	0.95129		12.4987	-0.00525		12.5	-0.4487
				12.5019	-0.59319		12.5064	0.920773		12.5054	-0.00572		12.5067	-0.45013
				12.5085	-0.59414		12.5131	0.892162		12.5121	-0.00668		12.5133	-0.453
				12.5152	-0.59605		12.5198	0.864983		12.5188	-0.00811		12.52	-0.4549
				12.5219	-0.59843		12.5265	0.83971		12.5254	-0.00906		12.5267	-0.45729
				12.5285	-0.59986		12.5331	0.814438		12.5321	-0.01049		12.5333	-0.46015
				12.5352	-0.60034		12.5398	0.789642		12.5388	-0.01287		12.54	-0.46301
				12.5419	-0.59986		12.5465	0.765324		12.5454	-0.01621		12.5467	-0.46301
				12.5485	-0.59986		12.5531	0.741005		12.5521	-0.0186		12.5533	-0.4611
				12.5552	-0.59986		12.5598	0.71764		12.5587	-0.0205		12.56	-0.45967
				12.5619	-0.59986		12.5664	0.694275		12.5654	-0.02146		12.5667	-0.45919
				12.5685	-0.59986		12.5731	0.671387		12.5721	-0.02146		12.5733	-0.45919
				12.5752	-0.59986		12.5798	0.649929		12.5787	-0.02098		12.58	-0.46062
				12.5819	-0.60034		12.5864	0.630856		12.5854	-0.0205		12.5867	-0.46301
				12.5885	-0.60177		12.5931	0.612736		12.5921	-0.02098		12.5933	-0.46635
				12.5952	-0.6032		12.5998	0.594616		12.5988	-0.02146		12.6	-0.46921
				12.6019	-0.60415		12.6065	0.57745		12.6054	-0.02241		12.6067	-0.47064
				12.6085	-0.60415		12.6131	0.56076		12.6121	-0.02384		12.6133	-0.47159
				12.6152	-0.6032		12.6198	0.543594		12.6188	-0.02527		12.62	-0.47255
				12.6219	-0.60081		12.6265	0.526428		12.6254	-0.0267		12.6267	-0.47445
				12.6285	-0.59748		12.6331	0.510216		12.6321	-0.02766		12.6333	-0.47588
				12.6352	-0.59509		12.6398	0.494957		12.6387	-0.02909		12.64	-0.47684
				12.6419	-0.59509		12.6464	0.480652		12.6454	-0.03004		12.6467	-0.47779
				12.6485	-0.597		12.6531	0.466347		12.6521	-0.03099		12.6533	-0.47779
				12.6552	-0.59938		12.6598	0.452995		12.6587	-0.03195		12.66	-0.47827
				12.6619	-0.60129		12.6664	0.440598		12.6654	-0.03099		12.6667	-0.47874
				12.6685	-0.60272		12.6731	0.428677		12.6721	-0.03052		12.6733	-0.47922
				12.6752	-0.6032		12.6798	0.417233		12.6788	-0.03004		12.68	-0.47922
				12.6819	-0.60225		12.6865	0.404835		12.6854	-0.03004		12.6867	-0.47922
				12.6885	-0.60034		12.6931	0.392914		12.6921	-0.03052		12.6933	-0.4797
				12.6952	-0.59938		12.6998	0.382423		12.6988	-0.03147		12.7	-0.47922
				12.7019	-0.59938		12.7065	0.372887		12.7054	-0.03338		12.7067	-0.47827
				12.7085	-0.60081		12.7131	0.362873		12.7121	-0.03481		12.7133	-0.47779
				12.7152	-0.60177		12.7198	0.351906		12.7188	-0.03481		12.72	-0.47779
				12.7219	-0.60225		12.7264	0.340462		12.7254	-0.03529		12.7267	-0.47827
				12.7285	-0.6032		12.7331	0.328064		12.7321	-0.03624		12.7333	-0.47827
				12.7352	-0.60368		12.7398	0.315189		12.7387	-0.03767		12.74	-0.47779
				12.7419	-0.6032		12.7464	0.302315		12.7454	-0.03862		12.7467	-0.47827
				12.7485	-0.60081		12.7531	0.291348		12.7521	-0.03958		12.7533	-0.4797
				12.7552	-0.59938		12.7598	0.281811		12.7587	-0.04148		12.76	-0.48161
				12.7619	-0.59891		12.7665	0.273705		12.7654	-0.04339		12.7667	-0.48399
				12.7685	-0.59938		12.7731	0.266552		12.7721	-0.04387		12.7733	-0.4878
				12.7752	-0.59986		12.7798	0.26083		12.7788	-0.04339		12.78	-0.4921
				12.7819	-0.60034		12.7865	0.254154		12.7854	-0.04292		12.7867	-0.49591
				12.7885	-0.60081		12.7931	0.247002		12.7921	-0.04339		12.7933	-0.49877
				12.7952	-0.60034		12.7998	0.238895		12.7988	-0.04339		12.8	-0.5002
				12.8019	-0.59938		12.8064	0.230312		12.8054	-0.04292		12.8067	-0.49973
				12.8085	-0.59795		12.8131	0.221729		12.8121	-0.04292		12.8133	-0.49734
				12.8152	-0.597		12.8198	0.213146		12.8187	-0.04435		12.82	-0.49496
				12.8219	-0.597		12.8264	0.204563		12.8254	-0.04578		12.8267	-0.49353
				12.8285	-0.59795		12.8331	0.196457		12.8321	-0.04768		12.8333	-0.49162
				12.8352	-0.60034		12.8398	0.190258		12.8387	-0.04959		12.84	-0.48923
				12.8419	-0.6032		12.8465	0.184536		12.8454	-0.0515		12.8467	-0.48923
				12.8485	-0.60511		12.8531	0.178814		12.8521	-0.05293		12.8533	-0.49114
				12.8552	-0.60558		12.8598	0.174522		12.8588	-0.05484		12.86	-0.494
				12.8619	-0.60654		12.8665	0.170708		12.8654	-0.0577		12.8667	-0.49543
				12.8685	-0.60701		12.8731	0.165462		12.8721	-0.05913		12.8733	-0.49734
				12.8752	-0.60654		12.8798	0.15831		12.8788	-0.05913		12.88	-0.49973
				12.8819	-0.60558		12.8864	0.151157		12.8854	-0.05913		12.8867	-0.50211
				12.8885	-0.60511		12.8931	0.145435		12.8921	-0.05865		12.8933	-0.50354
				12.8952	-0.60606		12.8998	0.14019		12.8987	-0.05722		12.9	-0.50402
				12.9019	-0.60797		12.9064	0.134468		12.9054	-0.05388		12.9067	-0.50545
				12.9085	-0.61035		12.9131	0.130653		12.9121	-0.05198		12.9133	-0.50735
				12.9152	-0.61321		12.9198	0.128746		12.9187	-0.05293		12.92	-0.50926
				12.9219	-0.61655		12.9265	0.125885		12.9254	-0.05531		12.9267	-0.51069
				12.9285	-0.61941		12.9331	0.121593		12.9321	-0.0577		12.9333	-0.51117
				12.9352	-0.62132		12.9398	0.116348		12.9388	-0.06008		12.94	-0.51022
				12.9419	-0.6218		12.9465	0.110626		12.9454	-0.06342		12.9467	-0.50783
				12.9485	-0.6218		12.9531	0.104904		12.9521	-0.06676		12.9533	-0.50402
				12.9552	-0.62084		12.9598	0.098705		12.9588	-0.0701		12.96	-0.50068
				12.9619	-0.61893		12.9665	0.092983		12.9654	-0.07248		12.9667	-0.49829
				12.9685	-0.61655		12.9731	0.088215		12.9721	-0.07391		12.9733	-0.49782
				12.9752	-0.61464		12.9798	0.085831		12.9787	-0.07439		12.98	-0.49973
				12.9819	-0.61226		12.9864	0.084877		12.9854	-0.07343		12.9867	-0.50354
				12.9885	-0.60987		12.9931	0.083447		12.9921	-0.07248		12.9933	-0.50831
				12.9952	-0.60892		12.9998	0.081062		12.9987	-0.07153		13	-0.51308
				13.0019	-0.6094		13.0064	0.078201		13.0054	-0.072		13.0067	-0.51737
				13.0085	-0.61035		13.0131	0.074863		13.0121	-0.07296		13.0133	-0.52023
				13.0152	-0.61178		13.0198	0.069618		13.0188	-0.07582		13.02	-0.52071
				13.0219	-0.61321		13.0265	0.062943		13.0254	-0.07915		13.0267	-0.51975
				13.0285	-0.6156		13.0331	0.058651		13.0321	-0.08202		13.0333	-0.51785
				13.0352	-0.6175		13.0398	0.056744		13.0388	-0.08249		13.04	-0.51641
				13.0419	-0.61798		13.0465	0.05579		13.0454	-0.08202		13.0467	-0.51498
				13.0485	-0.61703		13.0531	0.05579		13.0521	-0.08154		13.0533	-0.51451
				13.0552	-0.61512		13.0598	0.055313		13.0587	-0.08154		13.06	-0.51546
				13.0619	-0.61369		13.0664	0.055313		13.0654	-0.08106		13.0667	-0.51785
				13.0685	-0.61178		13.0731	0.054836		13.0721	-0.08154		13.0733	-0.52023
				13.0752	-0.61035		13.0798	0.053406		13.0787	-0.08297		13.08	-0.52166
				13.0819	-0.60892		13.0864	0.051022		13.0854	-0.0844		13.0867	-0.52261
				13.0885	-0.60844		13.0931	0.047684		13.0921	-0.0844		13.0933	-0.52309
				13.0952	-0.60797		13.0998	0.044346		13.0988	-0.08345		13.1	-0.52261
				13.1019	-0.60797		13.1065	0.040531		13.1054	-0.08297		13.1067	-0.51975
				13.1085	-0.60749		13.1131	0.03624		13.1121	-0.08249		13.1133	-0.51737
				13.1152	-0.60654		13.1198	0.031471		13.1188	-0.08202		13.12	-0.51641
				13.1219	-0.60511		13.1265	0.028133		13.1254	-0.08249		13.1267	-0.51498
				13.1285	-0.6032		13.1331	0.025749		13.1321	-0.08392		13.1333	-0.51403
				13.1352	-0.60272		13.1398	0.024319		13.1387	-0.0844		13.14	-0.51355
				13.1419	-0.60272		13.1464	0.022888		13.1454	-0.08488		13.1467	-0.51308
				13.1485	-0.60272		13.1531	0.023365		13.1521	-0.08488		13.1533	-0.51308
				13.1552	-0.60272		13.1598	0.023365		13.1587	-0.08392		13.16	-0.51117
				13.1619	-0.6032		13.1664	0.022888		13.1654	-0.08345		13.1667	-0.50831
				13.1685	-0.6032		13.1731	0.021458		13.1721	-0.08249		13.1733	-0.50592
				13.1752	-0.60225		13.1798	0.020981		13.1788	-0.08297		13.18	-0.50545
				13.1819	-0.60225		13.1865	0.020504		13.1854	-0.0844		13.1867	-0.5064
				13.1885	-0.60225		13.1931	0.01955		13.1921	-0.08535		13.1933	-0.50879
				13.1952	-0.60225		13.1998	0.017166		13.1988	-0.08583		13.2	-0.51069
				13.2019	-0.60177		13.2065	0.015259		13.2054	-0.08631		13.2067	-0.5126
				13.2085	-0.60177		13.2131	0.013351		13.2121	-0.08678		13.2133	-0.51451
				13.2152	-0.60129		13.2198	0.011444		13.2188	-0.08726		13.22	-0.51451
				13.2219	-0.59986		13.2264	0.00906		13.2254	-0.08774		13.2267	-0.51355
				13.2285	-0.597		13.2331	0.008106		13.2321	-0.08821		13.2333	-0.51308
				13.2352	-0.59509		13.2398	0.008583		13.2387	-0.08965		13.24	-0.51355
				13.2419	-0.59462		13.2464	0.009537		13.2454	-0.09012		13.2467	-0.51403
				13.2485	-0.59509		13.2531	0.010014		13.2521	-0.09012		13.2533	-0.51403
				13.2552	-0.59509		13.2598	0.01049		13.2587	-0.08965		13.26	-0.51451
				13.2619	-0.59462		13.2665	0.010967		13.2654	-0.09012		13.2667	-0.51594
				13.2685	-0.59414		13.2731	0.009537		13.2721	-0.0906		13.2733	-0.51641
				13.2752	-0.59366		13.2798	0.006676		13.2788	-0.09155		13.28	-0.51594
				13.2819	-0.59223		13.2865	0.004768		13.2854	-0.09251		13.2867	-0.51594
				13.2885	-0.59128		13.2931	0.003338		13.2921	-0.09298		13.2933	-0.51689
				13.2952	-0.59128		13.2998	0.001431		13.2988	-0.09584		13.3	-0.51832
				13.3019	-0.59223		13.3064	-0.00095		13.3054	-0.09918		13.3067	-0.5188
				13.3085	-0.59319		13.3131	-0.00143		13.3121	-0.10204		13.3133	-0.5188
[truncated: 2,504 more rows]

## Sheet: 1G
				Fig 1G. Absorbance and fluorescence spectra of 25 μM PC6/PAD6
				x axis	y axis: Absobance		y axis: RFU
				Wavelength (nm)	PC6	PAD6	PC6	PAD6
				250	0.3834	0.3891
				260	0.2145	0.4387
				270	0.2306	0.325
				280	0.3272	0.1546
				290	0.4735	0.0578
				300	0.6151	0.0318
				310	0.7597	0.0295
				320	0.8766	0.0406
				330	0.8966	0.0661
				340	0.7394	0.1207
				350	0.4816	0.1855
				360	0.2439	0.2668	-153
				370	0.1315	0.3401	59
				380	0.0774	0.4236	508
				390	0.0619	0.4657	1105
				400	0.0508	0.4689	2066
				410	0.04	0.4201	2838
				420	0.0329	0.3327	3684	-8
				430	0.0283	0.2262	4232	87
				440	0.0251	0.1376	4368	466
				450	0.023	0.071	4280	1811
				460	0.021	0.0269	4062	5280
				470	0.0198	0.0109	3783	12054
				480	0.0184	-0.0001	3441	22565
				490	0.0173	-0.0016	3069	37292
				500	0.0167	-0.0038	2665	51984
				510	0.0154	-0.0032	2231	63687
				520	0.0142	-0.0033	1787	69779
				530	0.0136	-0.0032	1395	69957
				540	0.0136	-0.0033	1066	64300
				550	0.0126	-0.0035	799	55872
				560	0.0116	-0.003	557	45119
				570	0.011	-0.0031	397	35725
				580	0.0103	-0.0031	287	27292
				590	0.0097	-0.0029	196	19868
				600	0.0092	-0.0029	152	14646
				610	0.0088	-0.0028	102	10252
				620	0.0082	-0.0029	59	7095
				630	0.0081	-0.0027	48	5076
				640	0.0074	-0.0029	34	3445
				650	0.007	-0.0028	13	2427
				660	0.0066	-0.0026	6	1798
				670	0.0063	-0.0028	1	1294
				680	0.0061	-0.0027	-7	921
				690	0.0057	-0.0028	-13	685
				700	0.0057	-0.0027	-6	445

## Sheet: 1H
				Fig 1H. Emission spectra with dose of NMN (10, 20, 40, 60 μM) in the presence of NAD, PC6 and SARM1-dN
				X axis	Y axis
				NMN (μM）	Initial rate (RFU/min)
				0	29.1	20.2	28.8
				10	94	92.3	100.2
				20	229.9	249	204.5
				40	350.6	386.7	401.9
				60	516.9	511.7	501.4
			Scan emission after reaction at 390 nm excitation
			x axis	y axis: RFU
			Wavelength (nm)	Control	10 μM NMN	20 μM NMN	40 μM NMN	60 μM NMN
			420	393	466	422	450	425
			430	414	520	486	518	510
			440	569	661	645	674	699
			450	797	916	990	1091	1202
			460	1067	1275	1521	1789	2108
			470	1457	1817	2382	2947	3580
			480	1853	2440	3439	4559	5722
			490	2190	3162	4694	6476	8454
			500	2387	3637	5857	8440	11152
			510	2419	3943	6567	9810	12915
			520	2285	3915	6745	10280	13800
			530	1997	3619	6482	10083	13659
			540	1644	3144	5607	8980	12042
			550	1304	2551	4759	7468	10214
			560	990	1974	3726	5938	8120
			570	770	1573	3030	4782	6559
			580	587	1163	2271	3608	5026
			590	421	878	1635	2605	3626
			600	300	620	1181	1944	2579
			610	205	438	814	1345	1881
			620	161	297	628	941	1317
			630	111	226	435	689	918
			640	90	150	275	466	621
			650	60	123	229	347	446

## Sheet: 1I
				Fig 1I. Emission spectra with doses of SARM1-dN in the presence of NMN, NAD and PC6
				X axis	Y axis
				dN-SARM1 (μg/ml)	Initial rate: RFU/min
				0	-2.0595	2.2619	-0.78571
				0.3	167.71	174.25	179.69
				0.6	345.46	326.4	335.8
				1.2	633.21	608.99	623.6
				1.8	874.1	873.42	891
				2.4	1111.8	1128.4	1134.9
				3	1309.1	1344.1	1329.1
	Scan emission after reaction at 390 nm excitation
	x axis	y axis: RFU
	Wavelength (nm)	Control	0.3 μg/ml SARM1-dN	0.6 μg/ml SARM1-dN	1.2 μg/ml SARM1-dN	1.8 μg/ml SARM1-dN	2.4 μg/ml SARM1-dN	3 μg/ml SARM1-dN
	420	336	979	351	355	1054	970	379
	430	408	1063	410	425	1183	1083	453
	440	543	1215	586	623	1413	1337	742
	450	743	1437	980	1174	2009	2083	1675
	460	1014	1781	1629	2178	3284	3724	3628
	470	1321	2432	2740	3987	5667	6802	7291
	480	1621	3264	4166	6500	9090	11234	12534
	490	1865	4307	6127	9940	13918	17230	19778
	500	1938	5141	7961	13247	18745	23656	27280
	510	1877	5715	9240	15663	22218	28411	32397
	520	1691	5861	9628	16868	24086	30506	35546
	530	1468	5545	9439	16622	23826	30540	35302
	540	1138	4909	8454	15083	21503	27401	32329
	550	898	4025	7184	12549	18089	23241	27007
	560	664	3155	5623	10008	14286	18606	21421
	570	500	2530	4457	8229	11834	15199	17363
	580	383	1909	3455	6132	8910	11621	13256
	590	269	1372	2483	4409	6394	8381	9554
	600	211	1036	1793	3348	4761	6031	7238
	610	138	721	1241	2290	3194	4078	4803
	620	116	508	925	1571	2313	2907	3382
	630	80	377	685	1161	1630	2157	2444
	640	58	263	418	770	1054	1413	1638
	650	51	177	294	542	802	1017	1160

## Sheet: 1J
				Fig 1J. The reaction rates of 10 μM PC6 compared with NAD analogues (100 μM) catalyzed by SARM1
					RFU/min
					-NMN			+NMN
				PC6	101.1	118.8	112	1002	1058.5	1100.8
				εNAD	5.4569	6.7057	6.0698	77.5003	66.7641	79.3166
				NHD	0.3538	0.8091	-0.747	1.3824	-0.09	0.0455
				NGD	0.4237	-0.423	0.36	-0.236	0.8405	0.2513

## Sheet: 1K
				Fig 1K. The reaction rates of 10 μM PC6 catalyzed by SARM1, NADase and CD38
					RFU/min
					dN-SARM1			CD38			NADase
				PC6	1025.7	1018.6	1092.9	15.9	23.3	17.4	2.7	1.7	0.7
				εNAD	77.5003	66.7641	79.3166	85.7391	89.298	80.84	79.4461	70.1139	70.1146
