# Supplementary material for: Permeant fluorescent probes visualize the activation of SARM1 and uncover an anti-neurodegenerative drug candidate
Source: eLife. 2021 May 4;10:e67381. doi: 10.7554/eLife.67381 (PMC8143800; doi:10.7554/eLife.67381)
Supplement: Figure 1—source data 2. [file elife-67381-fig1-data2.xlsx]

## Sheet: Fig1-supp11C
			Fig1-s11C. The initial rates of the fluorescence increase at the maximal absorbance/emission wavelengths
			RFU/min
			PC5	PC6	PC7	PC8
			177	1391.2	78.1	194.1
			190.6	1492.1	64.5	214.9
			202.4	1579.2	60.2	228.4

## Sheet: Fig1-supp12
Fig1-S12. UV-vis absorption spectra scanning of the reactants
PC1
x axis	y axis: absorbance
wavelength (nm)	0 min	5 min	10 min	15 min	20 min	25 min	30 min	35 min	40 min	45 min	50 min
300	0.6079	0.6078	0.607	0.6043	0.6052	0.603	0.5996	0.5974	0.6009	0.5966	0.6019
305	0.6012	0.6	0.599	0.5982	0.5975	0.5941	0.5944	0.592	0.5914	0.5909	0.5939
310	0.629	0.6283	0.6282	0.6264	0.6245	0.6224	0.6211	0.623	0.621	0.6175	0.6184
315	0.6542	0.6513	0.6513	0.6497	0.6468	0.6453	0.6438	0.6465	0.6424	0.642	0.6447
320	0.6867	0.6867	0.6843	0.6826	0.6813	0.6774	0.6786	0.6738	0.675	0.6738	0.6767
325	0.7106	0.7093	0.7052	0.7037	0.7052	0.7069	0.6975	0.6983	0.6955	0.696	0.6967
330	0.7425	0.7436	0.7396	0.7382	0.7384	0.7362	0.7321	0.7302	0.7317	0.7307	0.7297
335	0.7668	0.7688	0.7671	0.7662	0.7643	0.762	0.7604	0.7602	0.7587	0.7587	0.7605
340	0.7751	0.7762	0.7748	0.7733	0.7715	0.7705	0.7683	0.769	0.767	0.7662	0.768
345	0.765	0.7679	0.767	0.7655	0.7614	0.7605	0.7605	0.7576	0.7603	0.7611	0.7603
350	0.7383	0.7345	0.7358	0.7351	0.7365	0.7357	0.7313	0.7342	0.7268	0.7307	0.7324
355	0.6903	0.6876	0.6887	0.6884	0.6875	0.6877	0.6858	0.6854	0.684	0.6857	0.6871
360	0.6178	0.6253	0.6259	0.626	0.6313	0.6292	0.6245	0.6294	0.6243	0.6258	0.6261
365	0.5602	0.5621	0.5631	0.5634	0.5601	0.5608	0.564	0.5592	0.5622	0.5642	0.5648
370	0.4894	0.4955	0.4956	0.4975	0.4895	0.4909	0.4983	0.4899	0.4984	0.5	0.4994
375	0.3998	0.4021	0.4046	0.406	0.4022	0.4045	0.4082	0.404	0.4099	0.4101	0.4109
380	0.3324	0.338	0.3402	0.3423	0.3408	0.3421	0.345	0.3465	0.3469	0.3481	0.349
385	0.2875	0.2859	0.2885	0.2914	0.2922	0.2951	0.2944	0.2959	0.2968	0.2969	0.298
390	0.2342	0.2404	0.2433	0.2463	0.2484	0.2504	0.2504	0.2516	0.2526	0.2537	0.2541
395	0.1983	0.2011	0.2046	0.2076	0.2093	0.2117	0.2127	0.2136	0.2145	0.2157	0.2162
400	0.1701	0.173	0.1768	0.1795	0.1819	0.185	0.1849	0.1862	0.1876	0.1888	0.1897
405	0.145	0.1484	0.1518	0.1552	0.1581	0.1607	0.161	0.1625	0.1641	0.1647	0.1655
410	0.1288	0.1322	0.1357	0.1395	0.1422	0.1452	0.146	0.1469	0.1482	0.1491	0.1499
415	0.1151	0.1189	0.1227	0.1263	0.1288	0.1319	0.1331	0.1342	0.136	0.1368	0.1375
420	0.106	0.1088	0.1135	0.1173	0.1201	0.1234	0.1243	0.1255	0.1269	0.1279	0.1288
425	0.0999	0.1031	0.1073	0.1113	0.1138	0.1171	0.118	0.1193	0.1207	0.1217	0.1223
430	0.0947	0.0977	0.1026	0.1063	0.1091	0.1126	0.1136	0.1146	0.1161	0.1167	0.1174
435	0.0899	0.0937	0.0978	0.1016	0.1042	0.1074	0.1085	0.1098	0.1109	0.112	0.1134
440	0.0861	0.0896	0.0941	0.0972	0.1005	0.1033	0.1041	0.1054	0.1074	0.108	0.1083
445	0.0825	0.086	0.0901	0.0937	0.0965	0.0991	0.1	0.1008	0.1026	0.1038	0.1044
450	0.0791	0.0822	0.0865	0.0899	0.0925	0.0952	0.0962	0.0966	0.0986	0.0995	0.1005
455	0.0762	0.0793	0.0837	0.0864	0.0894	0.092	0.0927	0.0932	0.095	0.0963	0.0965
460	0.0734	0.076	0.0802	0.0832	0.0853	0.0883	0.0887	0.0895	0.0912	0.0917	0.0923
465	0.0706	0.0735	0.0771	0.0801	0.0825	0.0847	0.086	0.0862	0.0876	0.0884	0.089
470	0.0685	0.0713	0.075	0.0773	0.0796	0.0819	0.0828	0.0832	0.0843	0.0851	0.0861
475	0.0661	0.0689	0.072	0.0744	0.0763	0.0784	0.0793	0.0795	0.0808	0.0814	0.082
480	0.0639	0.0664	0.0695	0.0716	0.0737	0.0757	0.0763	0.0768	0.0774	0.078	0.0783
485	0.0623	0.0648	0.0674	0.0695	0.0712	0.0729	0.0734	0.0737	0.0746	0.0755	0.0756
490	0.0608	0.0632	0.066	0.0677	0.0694	0.071	0.0716	0.0718	0.0724	0.073	0.0736
495	0.0597	0.0618	0.0644	0.0659	0.0676	0.069	0.0697	0.0698	0.0701	0.0709	0.0714
500	0.0586	0.0604	0.0629	0.0644	0.0657	0.0672	0.0674	0.0677	0.068	0.0685	0.069
PC2
x axis	y axis: absorbance
wavelength (nm)	0 min	5 min	10 min	15 min	20 min	25 min	30 min	35 min	40 min	45 min	50 min
300	0.446	0.4452	0.4402	0.4424	0.4336	0.4313	0.4289	0.4331	0.4266	0.4306	0.4249
305	0.3995	0.4021	0.3974	0.3979	0.3946	0.3931	0.3924	0.3909	0.3855	0.3904	0.3874
310	0.3942	0.3986	0.3972	0.3966	0.3921	0.392	0.3881	0.3872	0.3811	0.3856	0.3834
315	0.4075	0.4068	0.4075	0.4052	0.4016	0.3965	0.3972	0.3957	0.3911	0.3958	0.3906
320	0.4169	0.4228	0.4214	0.4177	0.4143	0.4124	0.4107	0.4113	0.4065	0.4101	0.4079
325	0.4263	0.4305	0.4309	0.4276	0.4225	0.4202	0.4191	0.4201	0.4166	0.4197	0.4164
330	0.4438	0.4485	0.45	0.4463	0.4423	0.4396	0.4387	0.4369	0.434	0.4356	0.4356
335	0.4622	0.4674	0.4681	0.4643	0.4609	0.4585	0.4567	0.4542	0.4517	0.4557	0.4512
340	0.4737	0.4778	0.4794	0.4768	0.4719	0.4705	0.4684	0.4674	0.4634	0.4668	0.4616
345	0.4808	0.4862	0.4885	0.4851	0.4814	0.4784	0.4769	0.4766	0.4736	0.4753	0.473
350	0.4863	0.4933	0.4912	0.4931	0.4844	0.4836	0.4818	0.4828	0.4802	0.4798	0.4789
355	0.4878	0.492	0.4929	0.492	0.4863	0.4865	0.4848	0.4857	0.4818	0.4831	0.4805
360	0.4818	0.4859	0.4856	0.4845	0.4817	0.482	0.4809	0.4781	0.4763	0.48	0.4766
365	0.4681	0.4723	0.4747	0.4741	0.4683	0.4686	0.4673	0.4688	0.4656	0.4654	0.4638
370	0.4499	0.4525	0.4579	0.4553	0.4497	0.4501	0.4495	0.4516	0.45	0.4493	0.4473
375	0.4222	0.4236	0.4272	0.4267	0.4214	0.4222	0.4212	0.4246	0.4225	0.4215	0.419
380	0.3982	0.3992	0.4003	0.3984	0.3982	0.3983	0.3981	0.3976	0.3967	0.3979	0.3961
385	0.3724	0.3725	0.3741	0.377	0.3721	0.3727	0.3722	0.3758	0.3709	0.3725	0.3698
390	0.3453	0.3454	0.3461	0.344	0.3454	0.346	0.3454	0.3438	0.3448	0.3457	0.3445
395	0.3174	0.3172	0.3179	0.3179	0.3174	0.3182	0.3175	0.3186	0.317	0.3176	0.3162
400	0.2931	0.2924	0.2933	0.2934	0.2929	0.2935	0.2933	0.2942	0.2926	0.2928	0.292
405	0.2673	0.2658	0.2669	0.2674	0.2668	0.268	0.267	0.2681	0.2669	0.2677	0.2659
410	0.2478	0.246	0.2466	0.2476	0.2469	0.248	0.2479	0.2483	0.2471	0.2475	0.2454
415	0.2276	0.2258	0.2266	0.2274	0.2267	0.2284	0.2279	0.2281	0.2271	0.2273	0.2254
420	0.2123	0.2106	0.2112	0.2121	0.2111	0.2131	0.2122	0.2131	0.2108	0.2115	0.2101
425	0.2015	0.1992	0.2004	0.2013	0.2004	0.2023	0.2015	0.2022	0.2012	0.2009	0.1992
430	0.1934	0.1913	0.1916	0.1929	0.1922	0.194	0.1933	0.194	0.1928	0.192	0.1909
435	0.1851	0.183	0.183	0.1849	0.1845	0.1867	0.1858	0.1864	0.1854	0.1849	0.1835
440	0.1791	0.1771	0.177	0.1785	0.1785	0.1809	0.1794	0.1805	0.1797	0.1789	0.1775
445	0.1736	0.1711	0.1711	0.1726	0.173	0.1749	0.1743	0.1747	0.1731	0.1734	0.1718
450	0.1677	0.1655	0.1661	0.1671	0.1674	0.1704	0.1688	0.1697	0.1685	0.1682	0.1666
455	0.164	0.1613	0.1614	0.1628	0.1636	0.1658	0.1649	0.1658	0.1639	0.1642	0.1628
460	0.1583	0.1562	0.1565	0.1579	0.1587	0.1612	0.1602	0.1606	0.1597	0.159	0.1579
465	0.1546	0.152	0.1526	0.1543	0.1548	0.1572	0.1569	0.1569	0.1559	0.1557	0.1542
470	0.1509	0.149	0.1491	0.1503	0.1516	0.1541	0.1535	0.1536	0.1527	0.1525	0.1512
475	0.147	0.1446	0.145	0.1463	0.1478	0.1501	0.1496	0.1496	0.1489	0.1485	0.1474
480	0.1433	0.1411	0.1415	0.1429	0.1438	0.1467	0.1458	0.1464	0.1453	0.1448	0.1437
485	0.1401	0.1372	0.1384	0.1396	0.1406	0.143	0.1426	0.1432	0.142	0.1415	0.1402
490	0.1375	0.1349	0.1358	0.1372	0.1383	0.1406	0.1403	0.1404	0.1394	0.1389	0.1377
495	0.1352	0.1323	0.133	0.1343	0.1353	0.1382	0.1372	0.1376	0.1369	0.1359	0.135
500	0.1321	0.1298	0.1304	0.1313	0.1326	0.1352	0.1346	0.1348	0.1339	0.1331	0.132
PC3
x axis	y axis: absorbance
wavelength (nm)	0 min	5 min	10 min	15 min	20 min	25 min	30 min	35 min	40 min	45 min	50 min
300	0.4666	0.467	0.4653	0.4615	0.4587	0.4649	0.4636	0.4655	0.4627	0.4621	0.4632
305	0.4109	0.411	0.411	0.404	0.4017	0.4106	0.4095	0.409	0.4074	0.4065	0.407
310	0.406	0.4053	0.4053	0.3988	0.397	0.4022	0.4042	0.4011	0.4026	0.4011	0.4017
315	0.4194	0.4224	0.4191	0.4116	0.4093	0.4147	0.4156	0.413	0.4106	0.4134	0.4135
320	0.4444	0.4422	0.4425	0.4377	0.4358	0.438	0.4356	0.4373	0.4376	0.4363	0.4364
325	0.4647	0.4634	0.4609	0.458	0.4545	0.4576	0.4555	0.4544	0.4541	0.458	0.4549
330	0.4969	0.494	0.4925	0.4878	0.4856	0.4855	0.4849	0.4862	0.484	0.4841	0.4842
335	0.5197	0.5189	0.5164	0.5117	0.5108	0.5107	0.5084	0.5085	0.507	0.505	0.5081
340	0.5283	0.5293	0.5282	0.5216	0.5212	0.5218	0.5204	0.5169	0.5175	0.5147	0.5183
345	0.5334	0.5301	0.529	0.5257	0.5232	0.5232	0.5206	0.5219	0.5228	0.5215	0.5188
350	0.5318	0.5334	0.5294	0.5271	0.5251	0.5233	0.5243	0.5201	0.5223	0.5197	0.5226
355	0.5349	0.533	0.5308	0.5278	0.5258	0.5259	0.5241	0.523	0.5235	0.5213	0.5223
360	0.5333	0.533	0.5299	0.5279	0.5248	0.527	0.5254	0.5242	0.5229	0.5211	0.5229
365	0.5306	0.5289	0.5282	0.5248	0.5242	0.5229	0.5222	0.5226	0.5222	0.5211	0.5205
370	0.527	0.5244	0.524	0.5207	0.5192	0.5186	0.5162	0.5187	0.5183	0.5184	0.5168
375	0.5172	0.515	0.5145	0.513	0.5111	0.5107	0.5105	0.5105	0.5107	0.5099	0.5092
380	0.5059	0.5031	0.5025	0.5015	0.5001	0.5005	0.4997	0.501	0.5003	0.4992	0.501
385	0.4931	0.4915	0.4898	0.4897	0.4885	0.4885	0.4892	0.489	0.4891	0.488	0.4895
390	0.4781	0.4762	0.4749	0.4748	0.4736	0.4752	0.4741	0.4746	0.4745	0.4744	0.475
395	0.459	0.4574	0.4567	0.4569	0.4557	0.457	0.4567	0.4569	0.457	0.4571	0.4581
400	0.4399	0.4385	0.4377	0.4375	0.4366	0.4385	0.4382	0.4386	0.4388	0.4389	0.4403
405	0.4144	0.4132	0.4119	0.413	0.4121	0.414	0.414	0.4146	0.4156	0.4152	0.4162
410	0.3897	0.3896	0.3877	0.3894	0.3882	0.3907	0.3909	0.392	0.3925	0.3924	0.3934
415	0.363	0.3631	0.3643	0.3633	0.3626	0.3653	0.3654	0.3667	0.367	0.3676	0.3686
420	0.3442	0.3399	0.345	0.3414	0.3444	0.3441	0.3439	0.3453	0.3468	0.3467	0.3479
425	0.3229	0.3243	0.3239	0.3256	0.3263	0.3277	0.329	0.3294	0.3306	0.3312	0.3321
430	0.308	0.3095	0.3111	0.3111	0.3133	0.3137	0.3155	0.3159	0.3176	0.3174	0.3191
435	0.294	0.2933	0.2932	0.2953	0.2956	0.2984	0.2994	0.3012	0.303	0.3032	0.3047
440	0.2791	0.2796	0.2792	0.2819	0.2836	0.2855	0.2867	0.288	0.2907	0.2913	0.2924
445	0.2654	0.2657	0.268	0.2687	0.2709	0.2729	0.2745	0.2761	0.2785	0.2787	0.2806
450	0.2538	0.2537	0.2554	0.2571	0.2595	0.2617	0.2633	0.2655	0.2681	0.2684	0.2699
455	0.2441	0.2453	0.247	0.2493	0.2517	0.2542	0.2564	0.2583	0.2607	0.2611	0.2635
460	0.2351	0.2368	0.2387	0.2407	0.2437	0.2464	0.2488	0.2505	0.2535	0.2546	0.2566
465	0.2297	0.2305	0.2328	0.2351	0.2384	0.2416	0.2437	0.246	0.2491	0.2504	0.2526
470	0.225	0.2258	0.2283	0.2306	0.2343	0.2376	0.2398	0.2429	0.2454	0.247	0.2492
475	0.2189	0.2201	0.2227	0.2256	0.2294	0.2328	0.2356	0.2384	0.2417	0.2438	0.2458
480	0.2129	0.2152	0.2181	0.2213	0.225	0.2291	0.2325	0.2353	0.2386	0.2407	0.2429
485	0.2093	0.2103	0.2135	0.2171	0.2213	0.2253	0.2276	0.2318	0.2351	0.2376	0.2399
490	0.2056	0.2067	0.2101	0.2136	0.218	0.2223	0.2251	0.2292	0.2327	0.2352	0.2378
495	0.2012	0.2029	0.2063	0.2102	0.2145	0.2191	0.2226	0.2259	0.2299	0.2325	0.2351
500	0.1964	0.1986	0.2023	0.2059	0.2106	0.2151	0.2194	0.2227	0.2263	0.2292	0.2321
505	0.1916	0.1937	0.1972	0.2015	0.2061	0.2108	0.2145	0.2184	0.2225	0.2254	0.2281
510	0.1874	0.1895	0.1932	0.1975	0.2022	0.2068	0.2106	0.2145	0.2184	0.2211	0.224
515	0.183	0.1851	0.189	0.1933	0.1979	0.2027	0.2064	0.2101	0.2143	0.2168	0.2197
520	0.1788	0.1807	0.1844	0.1885	0.1929	0.1977	0.2014	0.2051	0.2087	0.2116	0.2145
525	0.174	0.1762	0.1798	0.1838	0.1882	0.1925	0.1961	0.1997	0.2037	0.2058	0.2088
530	0.1703	0.1724	0.1757	0.1798	0.1841	0.1881	0.1916	0.1949	0.1985	0.2008	0.2034
535	0.1671	0.1692	0.1724	0.1761	0.1802	0.1844	0.1876	0.1904	0.194	0.1962	0.1985
540	0.1636	0.1654	0.1682	0.1719	0.1761	0.1795	0.1823	0.1857	0.1879	0.1913	0.1935
545	0.16	0.1617	0.1644	0.1677	0.1711	0.1742	0.177	0.1795	0.1823	0.1843	0.1863
550	0.1569	0.1588	0.1614	0.1646	0.167	0.1707	0.1727	0.1744	0.1775	0.1791	0.1806
555	0.1532	0.1552	0.1574	0.16	0.1624	0.1652	0.1673	0.1689	0.1713	0.1726	0.174
560	0.1503	0.1522	0.1542	0.1566	0.1583	0.1613	0.1628	0.1638	0.1665	0.167	0.1682
565	0.1474	0.1488	0.1505	0.1527	0.1547	0.1569	0.1582	0.1596	0.1612	0.1622	0.1629
570	0.1441	0.1451	0.1465	0.1483	0.1501	0.1516	0.1525	0.1538	0.1549	0.1559	0.157
575	0.1411	0.1424	0.1438	0.1451	0.1462	0.1481	0.1487	0.1492	0.1507	0.1511	0.152
580	0.1387	0.1399	0.1404	0.1421	0.1434	0.1446	0.1452	0.1457	0.1468	0.1473	0.1477
585	0.1361	0.1373	0.1381	0.1391	0.1401	0.1415	0.1417	0.1419	0.1429	0.1432	0.1437
590	0.1337	0.1345	0.1353	0.1363	0.1369	0.1378	0.1382	0.1386	0.139	0.1397	0.1397
595	0.1311	0.1318	0.1324	0.1331	0.1335	0.1346	0.1348	0.1348	0.1356	0.1357	0.1358
600	0.1291	0.1297	0.13	0.1307	0.1311	0.1321	0.1317	0.1322	0.1326	0.1327	0.1329
605	0.1265	0.127	0.1272	0.1279	0.1285	0.1288	0.1287	0.1292	0.1293	0.1295	0.1299
610	0.1248	0.1253	0.1255	0.126	0.1263	0.127	0.1273	0.1271	0.1273	0.1277	0.1277
615	0.1223	0.1227	0.1229	0.1232	0.1235	0.1242	0.1241	0.1237	0.1245	0.1246	0.1242
620	0.1207	0.1212	0.121	0.1213	0.1216	0.1221	0.1219	0.1223	0.1226	0.1228	0.123
625	0.1187	0.1189	0.1187	0.1191	0.1197	0.12	0.1198	0.1199	0.1202	0.1203	0.1206
630	0.1171	0.1172	0.1171	0.1175	0.1179	0.1182	0.1181	0.118	0.1183	0.1187	0.1187
635	0.115	0.1152	0.1151	0.1155	0.1157	0.1161	0.1159	0.1159	0.1164	0.1166	0.1167
640	0.1134	0.1136	0.1137	0.1137	0.1139	0.1145	0.1144	0.1143	0.1145	0.1148	0.115
645	0.1116	0.112	0.1115	0.1117	0.1121	0.1124	0.1125	0.1123	0.1128	0.1129	0.1129
650	0.1101	0.11	0.1102	0.1101	0.1106	0.111	0.1108	0.1107	0.1111	0.1113	0.1113
655	0.1084	0.1085	0.1083	0.1085	0.1088	0.1092	0.109	0.1089	0.1093	0.1096	0.1096
660	0.1071	0.1069	0.1069	0.1069	0.1073	0.1077	0.1077	0.1075	0.1077	0.1079	0.108
665	0.1055	0.1054	0.1053	0.1056	0.1058	0.1061	0.106	0.1061	0.1063	0.1065	0.1066
670	0.1038	0.1041	0.1039	0.1041	0.1043	0.1048	0.1046	0.1044	0.1047	0.1051	0.1051
675	0.1024	0.1025	0.1023	0.1025	0.1028	0.1031	0.1031	0.1031	0.1033	0.1036	0.1035
680	0.1014	0.1013	0.1012	0.1015	0.1016	0.1021	0.1022	0.102	0.102	0.1024	0.1028
685	0.0999	0.1001	0.0997	0.1001	0.1001	0.1007	0.1007	0.1005	0.101	0.101	0.1012
690	0.0986	0.0988	0.0984	0.0988	0.099	0.0994	0.0992	0.0991	0.0997	0.0999	0.0998
695	0.0974	0.0975	0.0972	0.0974	0.0978	0.0979	0.0979	0.098	0.0982	0.0983	0.0984
700	0.0962	0.0963	0.0959	0.0964	0.0965	0.0969	0.0969	0.097	0.097	0.0974	0.0972
PC4
x axis	y axis: absorbance
wavelength (nm)	0 min	5 min	10 min	15 min	20 min	25 min	30 min	35 min	40 min	45 min	50 min
240		3.3469	3.3104	3.4228	3.2609	3.5039	3.4688	3.2101	3.4433	3.1504	3.4039
245	2.8014	2.844	2.827	2.8749	2.8007	2.8132	2.7194	2.832	2.721	2.7574	2.6757
250	2.7027	2.7054	2.6493	2.6732	2.6303	2.6219	2.6356	2.6105	2.6052	2.6241	2.6338
255	2.85	2.851	2.8901	2.795	2.8628	2.7785	2.9055	3.0027	2.9513	2.867	2.9202
260	2.9965	3.1268	2.9867	3.0043	2.9916	3.138	2.928	3.0066	3.12	2.9977	2.9445
265	2.9925	3.0072	2.9745	2.9928	2.8868	2.9842	2.934	3.0027	2.9288	2.9596	2.9314
270	2.621	2.6178	2.6058	2.6061	2.6334	2.5863	2.6198	2.5876	2.5783	2.6222	2.6009
275	2.1493	2.1313	2.1267	2.0728	2.0568	2.041	2.029	2.0166	2.0113	2.0202	2.0242
280	1.4077	1.4011	1.3829	1.3785	1.3487	1.3326	1.3216	1.3173	1.3093	1.3058	1.3015
285	0.93	0.9275	0.9143	0.8866	0.8982	0.8864	0.8808	0.8768	0.8733	0.8707	0.8673
290	0.6317	0.632	0.6233	0.6186	0.616	0.6085	0.6063	0.6026	0.6005	0.5987	0.598
295	0.4933	0.4951	0.4907	0.4849	0.484	0.4755	0.4782	0.4746	0.4738	0.4724	0.4692
300	0.3958	0.4002	0.393	0.3928	0.3914	0.3836	0.3863	0.3835	0.3836	0.381	0.3789
305	0.3501	0.3542	0.3494	0.3477	0.3493	0.3416	0.3433	0.3418	0.34	0.3391	0.3361
310	0.3306	0.332	0.3274	0.3265	0.3292	0.3207	0.323	0.3212	0.3194	0.3184	0.3154
315	0.3166	0.3219	0.3184	0.3168	0.3177	0.3128	0.3122	0.3109	0.3095	0.308	0.3061
320	0.3128	0.3158	0.3129	0.3107	0.3117	0.3058	0.3071	0.3061	0.3037	0.3029	0.302
325	0.3016	0.3091	0.3063	0.2988	0.3039	0.3071	0.2958	0.2995	0.2921	0.2963	0.2947
330	0.2982	0.3005	0.2975	0.298	0.2957	0.292	0.2933	0.2919	0.2908	0.2891	0.2869
335	0.2871	0.2909	0.2882	0.2886	0.2856	0.2816	0.2854	0.2824	0.2815	0.2788	0.2775
340	0.2755	0.2802	0.2781	0.2779	0.2759	0.2713	0.2736	0.2727	0.2721	0.2695	0.2682
345	0.2592	0.2662	0.268	0.2632	0.2627	0.2635	0.2591	0.2594	0.2556	0.2542	0.2585
350	0.2511	0.2554	0.2539	0.2531	0.2511	0.2482	0.2498	0.2497	0.2484	0.2464	0.245
355	0.2402	0.2447	0.2431	0.2417	0.2407	0.2396	0.2393	0.2393	0.2381	0.2364	0.2357
360	0.2342	0.2364	0.2356	0.2366	0.234	0.2319	0.2346	0.2323	0.2321	0.2302	0.2292
365	0.2265	0.2309	0.2301	0.2294	0.2293	0.2292	0.2285	0.2284	0.2264	0.2261	0.2256
370	0.2213	0.2265	0.2256	0.2253	0.225	0.2264	0.2245	0.2247	0.2225	0.223	0.2224
375	0.2158	0.2199	0.2199	0.2197	0.2199	0.2208	0.2197	0.2203	0.2189	0.2184	0.218
380	0.2114	0.2149	0.2148	0.2154	0.2152	0.2154	0.2163	0.2162	0.2153	0.2144	0.2139
385	0.2053	0.2094	0.2099	0.2097	0.2108	0.2108	0.2109	0.2115	0.2106	0.21	0.2097
390	0.2003	0.203	0.2036	0.2049	0.2048	0.2049	0.2063	0.2056	0.2048	0.2042	0.2039
395	0.193	0.1963	0.1967	0.1976	0.1982	0.1984	0.1992	0.1996	0.1984	0.1982	0.1975
400	0.1865	0.1898	0.1903	0.1914	0.1919	0.192	0.193	0.1931	0.1922	0.1917	0.1916
405	0.1786	0.1818	0.1821	0.1831	0.1837	0.1838	0.1849	0.1852	0.1843	0.1839	0.1835
410	0.1718	0.1744	0.1749	0.1759	0.1767	0.1771	0.1777	0.1778	0.1774	0.1769	0.1767
415	0.1645	0.1669	0.1674	0.1686	0.1693	0.1699	0.1705	0.171	0.1702	0.17	0.1696
420	0.1581	0.1624	0.1617	0.1626	0.1618	0.1624	0.1656	0.1651	0.1628	0.1626	0.1639
425	0.1532	0.1552	0.156	0.157	0.1581	0.1588	0.1587	0.1592	0.1593	0.1588	0.1584
430	0.1493	0.1526	0.1513	0.1534	0.1539	0.1542	0.1553	0.156	0.155	0.1545	0.1548
435	0.1451	0.1473	0.148	0.1482	0.1491	0.1504	0.1505	0.1506	0.1508	0.1506	0.15
440	0.1413	0.143	0.1446	0.1447	0.146	0.1464	0.1461	0.1475	0.1469	0.1473	0.1459
445	0.1373	0.1401	0.1398	0.1415	0.1414	0.1424	0.1434	0.143	0.1428	0.1424	0.143
450	0.1335	0.1353	0.1364	0.1371	0.1376	0.1382	0.1389	0.1397	0.1385	0.1388	0.1383
455	0.1299	0.1325	0.1325	0.1338	0.1342	0.1352	0.1357	0.1358	0.1355	0.1352	0.1353
460	0.1258	0.1283	0.128	0.1297	0.1302	0.1307	0.1314	0.1311	0.1313	0.1309	0.1309
465	0.1225	0.1248	0.1249	0.1259	0.1264	0.1269	0.1278	0.1279	0.1275	0.1274	0.1271
470	0.1196	0.1217	0.122	0.1228	0.1229	0.1234	0.1244	0.1252	0.124	0.1242	0.124
475	0.1156	0.1176	0.1179	0.1186	0.119	0.1198	0.1205	0.1207	0.1202	0.1201	0.1199
480	0.1123	0.1144	0.1139	0.1151	0.1155	0.1165	0.1166	0.1163	0.1169	0.1163	0.1166
485	0.1091	0.111	0.1117	0.1119	0.112	0.1123	0.1133	0.1138	0.1127	0.1129	0.1125
490	0.107	0.1086	0.109	0.1096	0.1098	0.1102	0.1109	0.1113	0.1107	0.1108	0.1105
495	0.1045	0.1064	0.1065	0.1071	0.1072	0.1076	0.1087	0.1087	0.1083	0.108	0.1082
500	0.1021	0.104	0.104	0.1045	0.1047	0.1053	0.106	0.1061	0.1058	0.1054	0.1057
505	0.0995	0.1015	0.1013	0.1019	0.1022	0.1024	0.1032	0.1033	0.103	0.1029	0.1028
510	0.0975	0.0992	0.0993	0.0999	0.1	0.1004	0.1012	0.1011	0.1007	0.1006	0.1006
515	0.0955	0.0973	0.0974	0.0978	0.0982	0.0983	0.0991	0.0992	0.0988	0.0987	0.0986
520	0.0937	0.0954	0.0954	0.0959	0.0958	0.0964	0.0971	0.0973	0.0969	0.0967	0.0967
525	0.0919	0.0936	0.0936	0.0941	0.0941	0.0945	0.0953	0.0954	0.0951	0.0948	0.0947
530	0.0904	0.0921	0.0922	0.0925	0.0926	0.0931	0.0937	0.0939	0.0934	0.0933	0.0933
535	0.0891	0.0909	0.0911	0.0913	0.0914	0.0918	0.0927	0.0922	0.0923	0.0921	0.0922
540	0.0879	0.0897	0.0896	0.0902	0.0902	0.0899	0.0912	0.0909	0.0912	0.0908	0.0908
545	0.0867	0.0883	0.0883	0.0888	0.0888	0.089	0.0899	0.09	0.0896	0.0894	0.0892
550	0.0856	0.0873	0.0872	0.0877	0.0877	0.0881	0.089	0.0888	0.0887	0.0882	0.0886
555	0.0843	0.0861	0.086	0.0864	0.0865	0.0866	0.0877	0.0876	0.0874	0.0871	0.0871
560	0.0833	0.0849	0.085	0.0855	0.0854	0.086	0.0867	0.0866	0.0863	0.086	0.086
565	0.0822	0.0839	0.084	0.0842	0.0845	0.0846	0.0855	0.0853	0.0851	0.0849	0.0849
570	0.081	0.0829	0.0826	0.0831	0.0831	0.0834	0.0842	0.0842	0.084	0.0837	0.0837
575	0.0798	0.0816	0.0816	0.0818	0.0821	0.0825	0.083	0.083	0.0827	0.0826	0.0825
580	0.0792	0.0809	0.0807	0.0812	0.0812	0.0813	0.0822	0.0823	0.0819	0.0818	0.0818
585	0.078	0.0799	0.0797	0.0801	0.0803	0.0804	0.0812	0.0811	0.0809	0.0807	0.0807
590	0.0772	0.079	0.0789	0.0791	0.0794	0.0795	0.0804	0.0803	0.08	0.0799	0.0799
595	0.0762	0.078	0.0779	0.0781	0.0783	0.0786	0.0794	0.0793	0.079	0.079	0.0788
600	0.0756	0.0774	0.0773	0.0777	0.0779	0.078	0.0789	0.0787	0.0786	0.0783	0.0782
605	0.0747	0.0765	0.0765	0.0767	0.077	0.0772	0.0779	0.0779	0.0777	0.0775	0.0772
610	0.0742	0.076	0.076	0.0763	0.0765	0.0766	0.0775	0.0773	0.0772	0.077	0.0769
615	0.0733	0.0752	0.0752	0.0753	0.0755	0.0757	0.0763	0.0764	0.0761	0.0758	0.076
620	0.0729	0.0747	0.0747	0.0749	0.0751	0.0751	0.076	0.0758	0.0756	0.0756	0.0755
625	0.0719	0.0739	0.0739	0.074	0.0743	0.0742	0.0753	0.0752	0.0748	0.0746	0.0746
630	0.0716	0.0733	0.0732	0.0735	0.0737	0.0737	0.0747	0.0745	0.0743	0.0742	0.0741
635	0.0707	0.0725	0.0723	0.0729	0.0729	0.073	0.0738	0.0739	0.0734	0.0733	0.0733
640	0.0701	0.0721	0.0719	0.0723	0.0724	0.0725	0.0733	0.0731	0.0729	0.0728	0.0726
645	0.0693	0.0712	0.0715	0.0714	0.0717	0.0717	0.0726	0.0726	0.0722	0.072	0.0721
650	0.0691	0.0708	0.0707	0.071	0.0712	0.0714	0.0721	0.0718	0.0716	0.0715	0.0715
655	0.0683	0.07	0.0701	0.0702	0.0704	0.0707	0.0716	0.0712	0.0709	0.0708	0.0708
660	0.0679	0.0695	0.0695	0.0698	0.0703	0.0702	0.071	0.0709	0.0705	0.0704	0.0703
665	0.0675	0.0688	0.069	0.0693	0.0696	0.0697	0.0706	0.0705	0.0699	0.0697	0.0699
670	0.0671	0.0687	0.0686	0.0688	0.069	0.0691	0.07	0.0699	0.0695	0.0692	0.0695
675	0.0665	0.068	0.0679	0.0683	0.0686	0.0684	0.0692	0.0692	0.0689	0.0688	0.0688
680	0.0659	0.0676	0.0676	0.0677	0.0682	0.0681	0.0688	0.069	0.0684	0.0684	0.0686
685	0.0653	0.0671	0.0672	0.0674	0.0678	0.0678	0.0684	0.0682	0.0679	0.0679	0.0678
690	0.0648	0.0666	0.0666	0.067	0.0672	0.0674	0.0679	0.068	0.0674	0.0673	0.0674
695	0.0645	0.0659	0.0663	0.0665	0.0666	0.0667	0.0677	0.0675	0.067	0.067	0.067
700	0.0641	0.0657	0.066	0.0661	0.0664	0.0665	0.0672	0.0671	0.0667	0.0666	0.0668
705	0.064	0.0655	0.0659	0.066	0.0661	0.0662	0.0669	0.067	0.0666	0.0665	0.0665
710	0.0643	0.0656	0.0656	0.0663	0.0662	0.0662	0.0671	0.0669	0.0667	0.0665	0.0665
715	0.0638	0.0657	0.0658	0.0663	0.0663	0.0661	0.0672	0.0672	0.0666	0.0666	0.0666
720	0.0645	0.0661	0.0662	0.0665	0.0668	0.0667	0.0676	0.0673	0.067	0.0668	0.067
725	0.0649	0.0668	0.0671	0.0671	0.0674	0.0673	0.0682	0.0679	0.0675	0.0676	0.0675
730	0.0662	0.0678	0.0679	0.0682	0.0685	0.0684	0.0693	0.0691	0.0687	0.0687	0.0686
735	0.0676	0.069	0.0695	0.0695	0.0699	0.0697	0.0709	0.0704	0.0699	0.0701	0.0698
740	0.0687	0.0703	0.0705	0.0708	0.071	0.0709	0.072	0.0716	0.0713	0.0714	0.0714
745	0.0688	0.0703	0.0708	0.0709	0.0712	0.0712	0.072	0.0717	0.0712	0.0713	0.0713
750	0.0687	0.0704	0.0706	0.0709	0.0709	0.0708	0.072	0.0716	0.0711	0.0713	0.0712
755	0.0686	0.07	0.07	0.0702	0.0705	0.0705	0.0716	0.0713	0.0706	0.0706	0.0708
760	0.0682	0.07	0.0694	0.0699	0.0699	0.07	0.0711	0.071	0.0702	0.0703	0.0702
765	0.0677	0.0691	0.0695	0.0693	0.0697	0.0698	0.0705	0.0703	0.0698	0.0698	0.0698
770	0.0672	0.0686	0.0689	0.0691	0.0692	0.0691	0.07	0.07	0.0694	0.0695	0.0694
775	0.0665	0.0682	0.0683	0.0686	0.0686	0.0684	0.0697	0.0695	0.0689	0.0689	0.0688
780	0.0663	0.0676	0.0675	0.0677	0.0678	0.0677	0.0689	0.0687	0.0681	0.0683	0.0682
785	0.0656	0.0665	0.067	0.0672	0.0671	0.0672	0.0682	0.0679	0.0674	0.0674	0.0675
790	0.0649	0.0662	0.066	0.0663	0.0664	0.0663	0.0674	0.0674	0.0667	0.0666	0.0667
795	0.0642	0.0656	0.0654	0.0656	0.0654	0.0657	0.0664	0.0665	0.0659	0.0659	0.0657
800	0.0632	0.0648	0.0645	0.0646	0.0648	0.0648	0.066	0.0657	0.0651	0.065	0.065
805	0.0628	0.0643	0.0639	0.0641	0.0642	0.0641	0.0653	0.0651	0.0645	0.0646	0.0644
810	0.0621	0.0637	0.0636	0.0637	0.0635	0.0637	0.0647	0.0646	0.064	0.0641	0.0639
815	0.0617	0.0635	0.0631	0.0636	0.0634	0.0638	0.0645	0.0644	0.0638	0.0638	0.0639
820	0.0623	0.0638	0.0634	0.0636	0.0637	0.0637	0.0647	0.0648	0.0643	0.0642	0.064
825	0.0622	0.064	0.0637	0.0641	0.0638	0.0636	0.0647	0.0648	0.0643	0.0642	0.0647
830	0.0642	0.065	0.065	0.0652	0.0651	0.0659	0.0662	0.0662	0.0656	0.0656	0.065
835	0.0654	0.0669	0.0667	0.0672	0.0669	0.067	0.0679	0.068	0.0674	0.0674	0.0674
840	0.0669	0.0683	0.0682	0.0686	0.0684	0.0685	0.0693	0.0694	0.069	0.0688	0.0688
845	0.0674	0.0689	0.0686	0.069	0.0687	0.069	0.07	0.0698	0.0694	0.0694	0.0692
850	0.068	0.0691	0.0691	0.0694	0.0691	0.0694	0.0703	0.0701	0.0697	0.0697	0.0694
PC5
x axis	y axis: absorbance
wavelength (nm)	0 min	5 min	10 min	15 min	20 min	25 min	30 min	35 min	40 min	45 min	50 min
300	1.1599	1.1556	1.1412	1.1425	1.1402	1.1339	1.132	1.1301	1.1323	1.1308	1.1323
305	1.2233	1.2174	1.2008	1.1973	1.1948	1.1912	1.1935	1.1939	1.1913	1.1917	1.1896
310	1.2893	1.2855	1.2711	1.2648	1.2652	1.2591	1.26	1.2563	1.2604	1.2593	1.258
315	1.3363	1.3309	1.3189	1.3152	1.3141	1.3081	1.3098	1.3071	1.3073	1.3081	1.3082
320	1.4493	1.4448	1.4307	1.4265	1.4212	1.4148	1.4206	1.416	1.416	1.4132	1.417
325	1.4869	1.4834	1.4736	1.4683	1.4652	1.4605	1.4594	1.4609	1.4607	1.4563	1.4604
330	1.4894	1.4869	1.4711	1.4671	1.4615	1.4592	1.4653	1.463	1.4599	1.4565	1.4559
335	1.3882	1.3864	1.3867	1.385	1.3702	1.3744	1.3664	1.3643	1.3752	1.3665	1.3754
340	1.2495	1.25	1.2562	1.2527	1.2496	1.2467	1.2338	1.2335	1.2476	1.2349	1.2499
345	1.0759	1.0752	1.0468	1.0478	1.0763	1.0451	1.0702	1.0701	1.0469	1.07	1.047
350	0.8563	0.8584	0.8668	0.8677	0.8712	0.8705	0.8578	0.8599	0.8727	0.8614	0.8745
355	0.6558	0.661	0.663	0.6659	0.678	0.6692	0.6696	0.671	0.6742	0.6729	0.6757
360	0.4901	0.4963	0.507	0.513	0.5014	0.518	0.5157	0.5156	0.526	0.5182	0.5269
365	0.3808	0.3883	0.3884	0.3951	0.4048	0.4021	0.4116	0.4141	0.4105	0.4165	0.4119
370	0.3054	0.3138	0.3118	0.3214	0.331	0.3294	0.3429	0.3453	0.3404	0.3484	0.3415
375	0.241	0.2496	0.256	0.2651	0.2742	0.2771	0.285	0.2889	0.2877	0.2924	0.291
380	0.2117	0.2208	0.2297	0.2401	0.2475	0.2536	0.261	0.2636	0.2671	0.2678	0.2695
385	0.1943	0.2033	0.2139	0.2237	0.2358	0.2389	0.2446	0.2487	0.2521	0.2538	0.2556
390	0.1798	0.1895	0.201	0.2123	0.2206	0.2276	0.2338	0.238	0.2416	0.2429	0.2446
395	0.1664	0.1764	0.1884	0.1989	0.2093	0.2158	0.222	0.2262	0.2296	0.2316	0.2336
400	0.1551	0.1647	0.1774	0.1879	0.1984	0.2049	0.211	0.2152	0.2186	0.2205	0.2229
405	0.143	0.1528	0.1649	0.1755	0.1849	0.1916	0.1972	0.2017	0.2054	0.2068	0.2087
410	0.1337	0.1428	0.1543	0.164	0.1736	0.1796	0.1851	0.189	0.1921	0.1939	0.1957
415	0.1233	0.1321	0.1427	0.1517	0.1606	0.166	0.1711	0.1748	0.1781	0.1794	0.1809
420	0.116	0.1236	0.1333	0.141	0.1487	0.1539	0.1585	0.1617	0.1636	0.166	0.1668
425	0.1103	0.117	0.1254	0.132	0.1394	0.1435	0.1478	0.1505	0.1536	0.1539	0.1557
430	0.1058	0.1119	0.1189	0.125	0.1309	0.1345	0.1382	0.1408	0.1431	0.1439	0.1452
435	0.1019	0.1068	0.1127	0.1174	0.1228	0.1261	0.1293	0.131	0.1335	0.1334	0.1349
440	0.0988	0.1027	0.1081	0.1119	0.1162	0.1194	0.1216	0.1236	0.1259	0.1257	0.1269
445	0.0961	0.0994	0.1037	0.1069	0.1106	0.1127	0.1145	0.1165	0.1177	0.1182	0.1184
450	0.0934	0.096	0.0996	0.1022	0.1057	0.1074	0.109	0.1104	0.1117	0.1113	0.1126
455	0.0917	0.0937	0.097	0.0994	0.1016	0.1034	0.1049	0.1059	0.1074	0.107	0.1076
460	0.0892	0.091	0.0943	0.0958	0.0978	0.0996	0.1007	0.1017	0.1028	0.1026	0.1031
465	0.0875	0.0892	0.0915	0.0927	0.0952	0.0964	0.0978	0.0987	0.0995	0.0992	0.1
470	0.0859	0.0874	0.0895	0.0905	0.0931	0.0941	0.0951	0.0968	0.0968	0.0967	0.0977
475	0.0838	0.0851	0.087	0.0885	0.0906	0.0915	0.0928	0.0937	0.0941	0.0942	0.0949
480	0.0821	0.0829	0.0851	0.0865	0.0886	0.0892	0.0905	0.0916	0.0922	0.0926	0.0926
485	0.0803	0.0818	0.0836	0.0847	0.0867	0.0877	0.0888	0.0895	0.0905	0.0904	0.0909
490	0.0791	0.0801	0.082	0.0833	0.0853	0.0853	0.0871	0.0884	0.089	0.0888	0.0891
495	0.0777	0.0785	0.0807	0.0816	0.0835	0.0842	0.0851	0.0861	0.087	0.0869	0.0875
500	0.0764	0.0771	0.0788	0.0801	0.0818	0.0827	0.0835	0.0845	0.0852	0.0851	0.0854
PC6
x axis	y axis: absorbance
wavelength (nm)	0 min	5 min	10 min	15 min	20 min	25 min	30 min	35 min	40 min	45 min	50 min
300	0.9983	0.9798	0.9576	0.9385	0.923	0.9118	0.9023	0.8981	0.8948	0.8904	0.8869
305	1.0533	1.0297	1.0065	0.9828	0.9652	0.9502	0.9417	0.9349	0.9306	0.9278	0.9237
310	1.112	1.09	1.0619	1.0361	1.0166	1.0014	0.99	0.9855	0.9791	0.9752	0.9727
315	1.1679	1.1455	1.1141	1.0889	1.0698	1.0524	1.0436	1.0362	1.0292	1.0267	1.0223
320	1.2574	1.2312	1.1984	1.1688	1.1474	1.1309	1.1161	1.1066	1.1029	1.0988	1.0942
325	1.3	1.2709	1.2346	1.2065	1.181	1.1648	1.1516	1.1488	1.1385	1.134	1.1286
330	1.2923	1.265	1.2352	1.2062	1.1825	1.1678	1.1569	1.1467	1.1418	1.1382	1.1344
335	1.2128	1.19	1.1644	1.1399	1.1135	1.108	1.0963	1.0916	1.0867	1.0821	1.0793
340	1.0965	1.0789	1.0594	1.0401	1.0146	1.0145	1.0069	1.0034	0.9989	0.9966	0.9934
345	0.9158	0.9063	0.8916	0.8809	0.8935	0.8684	0.8813	0.8604	0.8774	0.8574	0.8562
350	0.7569	0.7532	0.7505	0.7476	0.7345	0.7421	0.7407	0.742	0.7426	0.7426	0.742
355	0.5728	0.5775	0.583	0.5888	0.5917	0.5962	0.5997	0.6016	0.6041	0.6059	0.6068
360	0.4316	0.4435	0.4579	0.4705	0.476	0.4898	0.4948	0.4995	0.503	0.5064	0.5081
365	0.326	0.3435	0.3635	0.3823	0.4018	0.4103	0.4186	0.4251	0.4305	0.4342	0.4372
370	0.2584	0.2808	0.3064	0.33	0.3558	0.3655	0.3758	0.3842	0.3908	0.3953	0.3983
375	0.2078	0.2343	0.2662	0.2956	0.3211	0.3378	0.3507	0.3605	0.368	0.3741	0.3785
380	0.1864	0.2164	0.2507	0.2835	0.3108	0.3311	0.3449	0.3558	0.3637	0.3706	0.3754
385	0.1733	0.2052	0.2431	0.2777	0.3065	0.3281	0.3433	0.3545	0.3634	0.3703	0.3759
390	0.1631	0.1966	0.2366	0.2725	0.3024	0.3249	0.3407	0.3527	0.3618	0.3691	0.3746
395	0.1549	0.1887	0.2298	0.2666	0.2969	0.3201	0.336	0.3484	0.3575	0.3651	0.3705
400	0.1476	0.1812	0.2221	0.2587	0.2887	0.3118	0.3277	0.3396	0.3491	0.3565	0.3619
405	0.1392	0.1717	0.2113	0.2461	0.2755	0.2971	0.3127	0.3241	0.333	0.3401	0.3454
410	0.132	0.1627	0.1994	0.2326	0.26	0.2804	0.2945	0.3056	0.3138	0.3205	0.3253
415	0.1247	0.1522	0.1852	0.2145	0.2384	0.2572	0.2702	0.2794	0.2871	0.2935	0.2977
420	0.1186	0.1413	0.1698	0.1964	0.2167	0.2322	0.2447	0.2567	0.259	0.2652	0.2678
425	0.1141	0.1341	0.1587	0.1803	0.1982	0.2115	0.2212	0.2275	0.2343	0.2386	0.2417
430	0.1101	0.1265	0.1465	0.1652	0.1799	0.1915	0.1997	0.2071	0.2103	0.2147	0.2167
435	0.1062	0.1188	0.1351	0.1491	0.1607	0.1698	0.1764	0.1833	0.1852	0.1881	0.19
440	0.103	0.1125	0.1254	0.1362	0.1456	0.1525	0.1572	0.1597	0.1643	0.1663	0.1683
445	0.0996	0.1068	0.1158	0.1239	0.1306	0.1357	0.1395	0.1436	0.1442	0.1466	0.1475
450	0.0972	0.1017	0.1081	0.1136	0.1188	0.1224	0.1249	0.1269	0.1286	0.1298	0.1303
455	0.095	0.098	0.1028	0.1068	0.1105	0.113	0.1149	0.1165	0.1178	0.1188	0.1194
460	0.0927	0.0946	0.0976	0.1	0.1022	0.104	0.1054	0.1066	0.1074	0.1081	0.1084
465	0.0911	0.0917	0.0938	0.0954	0.0972	0.0983	0.0993	0.1002	0.101	0.1017	0.1017
470	0.0895	0.0893	0.0912	0.0925	0.0938	0.0946	0.0953	0.0959	0.0966	0.0969	0.0969
475	0.0877	0.0876	0.0886	0.0892	0.0901	0.0909	0.0913	0.0917	0.0922	0.0927	0.0925
480	0.0859	0.0861	0.0864	0.0867	0.0877	0.0882	0.0882	0.089	0.0892	0.0894	0.0892
485	0.0845	0.0834	0.0846	0.0849	0.0854	0.0858	0.0862	0.0866	0.087	0.0873	0.087
490	0.0834	0.0826	0.0834	0.0836	0.0842	0.0845	0.085	0.0853	0.0856	0.0859	0.0857
495	0.0822	0.0815	0.082	0.0823	0.0828	0.0833	0.0836	0.0837	0.0841	0.0845	0.0843
500	0.0809	0.0806	0.0809	0.0811	0.0815	0.0819	0.0818	0.082	0.0825	0.0828	0.0828
PC7
x axis	y axis: absorbance
wavelength (nm)	0 min	5 min	10 min	15 min	20 min	25 min	30 min	35 min	40 min	45 min	50 min
280	2.0821	2.0472	2.0104	1.9303	1.9323	1.8971	1.8355	1.8205	1.8257	1.7764	1.7855
285	1.7154	1.6717	1.6221	1.589	1.5534	1.5131	1.5005	1.4719	1.4448	1.433	1.4121
290	1.5337	1.4843	1.4412	1.4005	1.3634	1.3378	1.3073	1.2851	1.2631	1.247	1.2268
295	1.4701	1.4257	1.3761	1.3391	1.3025	1.2689	1.2434	1.2232	1.1978	1.1815	1.161
300	1.4373	1.392	1.3486	1.3089	1.2742	1.2422	1.2151	1.1951	1.1725	1.1546	1.1375
305	1.4178	1.3803	1.3437	1.3118	1.2768	1.2536	1.2314	1.212	1.1906	1.1775	1.1625
310	1.4128	1.3825	1.3502	1.3262	1.2963	1.2787	1.2572	1.2396	1.2224	1.2119	1.1978
315	1.3112	1.297	1.2779	1.2676	1.2504	1.238	1.2309	1.22	1.208	1.208	1.1959
320	1.2039	1.2122	1.2144	1.2197	1.2172	1.2173	1.2205	1.2229	1.2204	1.2246	1.221
325	1.0995	1.1203	1.1381	1.1215	1.1584	1.1687	1.1592	1.1712	1.1956	1.191	1.2109
330	0.8815	0.9245	0.9626	0.9833	1.0203	1.0448	1.0604	1.0835	1.1053	1.119	1.1396
335	0.6014	0.6634	0.7188	0.7821	0.8122	0.8497	0.8954	0.9273	0.9431	0.9816	0.9919
340	0.43	0.5006	0.561	0.6276	0.6632	0.704	0.7538	0.7892	0.8074	0.848	0.8602
345	0.3256	0.3905	0.4471	0.4848	0.5439	0.5849	0.605	0.637	0.6819	0.6917	0.7307
350	0.2532	0.3095	0.3544	0.4064	0.4377	0.4701	0.5075	0.5353	0.5499	0.5814	0.5911
355	0.2171	0.2578	0.2935	0.3269	0.3549	0.3802	0.4036	0.4237	0.4403	0.4571	0.4701
360	0.1917	0.2195	0.245	0.2719	0.2895	0.3071	0.3282	0.3425	0.3508	0.366	0.372
365	0.1744	0.1946	0.2134	0.2285	0.2469	0.26	0.2693	0.2804	0.2926	0.2971	0.3076
370	0.1603	0.1764	0.1905	0.1998	0.2168	0.2264	0.2322	0.2399	0.251	0.2519	0.263
375	0.1462	0.1562	0.1671	0.1754	0.1849	0.193	0.201	0.2078	0.2145	0.2166	0.2225
380	0.138	0.1461	0.1551	0.1635	0.1707	0.1778	0.1864	0.1921	0.1971	0.2012	0.2036
385	0.132	0.1387	0.1458	0.1551	0.1627	0.1686	0.1755	0.1817	0.1855	0.1892	0.1927
390	0.1264	0.1325	0.1388	0.1466	0.154	0.1604	0.1663	0.1717	0.1751	0.1792	0.1822
395	0.1216	0.1266	0.1325	0.1395	0.1464	0.1524	0.1577	0.1626	0.1666	0.1696	0.1721
400	0.1178	0.122	0.127	0.1333	0.1396	0.1451	0.1499	0.1553	0.1577	0.162	0.1642
405	0.1137	0.1172	0.1211	0.127	0.1325	0.1376	0.1422	0.1459	0.1491	0.1512	0.1537
410	0.1101	0.1126	0.1164	0.1214	0.1265	0.1303	0.1348	0.1383	0.1409	0.1435	0.1451
415	0.1073	0.1088	0.1116	0.1161	0.1204	0.124	0.128	0.1307	0.133	0.135	0.1369
420	0.1045	0.1051	0.1076	0.1112	0.1146	0.118	0.1212	0.1225	0.1257	0.1273	0.1277
425	0.1019	0.103	0.1047	0.1079	0.1109	0.1134	0.1163	0.1187	0.1199	0.1213	0.1229
430	0.1007	0.1008	0.1022	0.1048	0.1078	0.1101	0.1127	0.1143	0.1154	0.1165	0.1171
435	0.0978	0.0983	0.0994	0.1019	0.1037	0.1051	0.1077	0.1091	0.1096	0.1117	0.1125
440	0.0962	0.0959	0.0968	0.099	0.1005	0.1017	0.1039	0.1051	0.1058	0.1068	0.1085
445	0.0943	0.0938	0.0943	0.096	0.098	0.0988	0.1007	0.102	0.102	0.1034	0.1037
450	0.0918	0.0916	0.0923	0.0932	0.0953	0.0961	0.0982	0.0984	0.0987	0.1	0.1005
455	0.0906	0.0901	0.0904	0.0918	0.0934	0.0939	0.0956	0.0966	0.0963	0.0974	0.0978
460	0.0892	0.0882	0.0885	0.0897	0.0915	0.0914	0.0928	0.0938	0.0939	0.0944	0.0944
465	0.0874	0.087	0.087	0.0878	0.0891	0.0898	0.091	0.0917	0.092	0.0924	0.0925
470	0.0856	0.0849	0.0855	0.0868	0.0876	0.0884	0.0894	0.0897	0.0901	0.0907	0.091
475	0.0844	0.0837	0.0837	0.0847	0.0853	0.0864	0.0872	0.0882	0.088	0.089	0.0893
480	0.0828	0.0818	0.082	0.0833	0.084	0.0847	0.0855	0.0867	0.0862	0.0871	0.0871
485	0.0812	0.0805	0.0806	0.0812	0.0823	0.0828	0.0838	0.0838	0.0846	0.0854	0.0854
490	0.08	0.0794	0.0796	0.0803	0.0809	0.0816	0.0829	0.0833	0.0831	0.0842	0.0844
495	0.0787	0.0783	0.0784	0.0792	0.0803	0.0809	0.0817	0.0823	0.0821	0.0831	0.0829
500	0.0777	0.0772	0.0773	0.0781	0.0789	0.0791	0.0803	0.0811	0.0805	0.0815	0.0814
PC8
x axis	y axis: absorbance
wavelength (nm)	0 min	5 min	10 min	15 min	20 min	25 min	30 min	35 min	40 min	45 min	50 min
280	1.7328	1.7197	1.6791	1.6535	1.6315	1.5812	1.5674	1.5477	1.5314	1.5198	1.5133
285	1.4183	1.3948	1.3572	1.3195	1.2779	1.2499	1.23	1.2055	1.1907	1.1761	1.1647
290	1.317	1.2879	1.2401	1.1905	1.1469	1.1011	1.0735	1.0443	1.0281	1.0118	1.0021
295	1.3366	1.297	1.2467	1.1867	1.1312	1.0833	1.0456	1.0133	0.9922	0.9706	0.9604
300	1.3964	1.3536	1.2952	1.2264	1.161	1.1045	1.0639	1.0288	1.0037	0.9829	0.9687
305	1.47	1.4236	1.36	1.2857	1.2092	1.1531	1.1058	1.0682	1.0439	1.0214	1.0051
310	1.4951	1.4567	1.3866	1.3147	1.2436	1.1831	1.1383	1.1054	1.074	1.0527	1.0386
315	1.4389	1.4039	1.3456	1.2806	1.2189	1.1658	1.1257	1.0917	1.0697	1.0505	1.0355
320	1.3934	1.3581	1.305	1.25	1.1947	1.1482	1.1107	1.0822	1.0617	1.0441	1.0348
325	1.259	1.2374	1.1994	1.1534	1.1119	1.0742	1.0477	1.0239	1.0081	0.9952	0.9873
330	1.1079	1.0926	1.0686	1.0388	1.012	0.9874	0.9695	0.9542	0.9425	0.9325	0.9259
335	0.9384	0.9342	0.9278	0.9159	0.9049	0.8954	0.8887	0.8811	0.8757	0.8716	0.8676
340	0.8004	0.8027	0.8119	0.8142	0.8181	0.8179	0.8221	0.8211	0.8213	0.819	0.821
345	0.6372	0.6555	0.6753	0.6989	0.7193	0.733	0.7471	0.7544	0.7599	0.7633	0.7678
350	0.5207	0.5442	0.5804	0.6156	0.6491	0.6747	0.6974	0.7118	0.7222	0.7293	0.7356
355	0.3748	0.4116	0.4643	0.5185	0.5696	0.6099	0.6431	0.6669	0.6834	0.6959	0.7056
360	0.2616	0.3083	0.3742	0.4431	0.5081	0.5603	0.6035	0.6333	0.6556	0.6721	0.6847
365	0.1862	0.2403	0.3157	0.3971	0.4721	0.533	0.5829	0.619	0.6458	0.6651	0.6798
370	0.152	0.2089	0.2905	0.3788	0.4601	0.5256	0.5803	0.6191	0.6483	0.6704	0.6861
375	0.1325	0.1913	0.276	0.3672	0.4528	0.5214	0.5787	0.6195	0.65	0.6743	0.6904
380	0.1249	0.1825	0.267	0.356	0.4409	0.5112	0.5659	0.6071	0.6378	0.6613	0.6776
385	0.1184	0.1737	0.2556	0.3427	0.4245	0.4913	0.5459	0.5855	0.6148	0.6377	0.6542
390	0.1112	0.1639	0.2397	0.3215	0.3979	0.4605	0.5116	0.5486	0.5764	0.5976	0.6128
395	0.1057	0.1527	0.2205	0.2938	0.3618	0.4181	0.4637	0.4968	0.5216	0.5406	0.5545
400	0.1011	0.1415	0.2002	0.2637	0.3229	0.3715	0.4109	0.4395	0.4611	0.4779	0.4895
405	0.0954	0.1284	0.1757	0.2264	0.2739	0.3127	0.3442	0.3671	0.3843	0.3974	0.4068
410	0.0912	0.1175	0.1546	0.1945	0.2319	0.2618	0.2871	0.3046	0.318	0.3287	0.336
415	0.0872	0.1059	0.132	0.1605	0.1864	0.2074	0.2253	0.2379	0.247	0.2548	0.2594
420	0.0855	0.097	0.1183	0.1345	0.1574	0.1661	0.1854	0.188	0.2006	0.2055	0.2028
425	0.0817	0.0902	0.1024	0.1157	0.127	0.1376	0.1447	0.1515	0.1539	0.1577	0.1614
430	0.0796	0.0859	0.095	0.1026	0.1123	0.1171	0.1215	0.127	0.1307	0.1333	0.1327
435	0.0781	0.0814	0.0865	0.092	0.0964	0.1006	0.1051	0.106	0.1066	0.1085	0.1095
440	0.0762	0.0786	0.0814	0.0851	0.0872	0.0906	0.0927	0.0937	0.0934	0.0947	0.0953
445	0.0747	0.0761	0.0789	0.0803	0.0827	0.0825	0.0848	0.0852	0.0862	0.0868	0.086
450	0.0737	0.0744	0.0758	0.0766	0.0781	0.0779	0.0802	0.0797	0.0796	0.0798	0.0799
455	0.0724	0.0732	0.0738	0.0748	0.0758	0.0757	0.0765	0.0765	0.0764	0.0768	0.0764
460	0.0708	0.0717	0.0725	0.0727	0.0737	0.0734	0.074	0.0742	0.0739	0.0743	0.0738
465	0.0699	0.0706	0.0713	0.0716	0.0724	0.0717	0.0727	0.0723	0.0721	0.0724	0.0722
470	0.0693	0.0696	0.0702	0.0706	0.071	0.0704	0.0717	0.0712	0.0712	0.0713	0.0712
475	0.0677	0.0684	0.0688	0.0692	0.0699	0.0692	0.0702	0.0699	0.0698	0.0699	0.0696
480	0.0662	0.0675	0.0678	0.068	0.0686	0.0681	0.0686	0.069	0.0685	0.0687	0.0686
485	0.0661	0.0664	0.0667	0.067	0.0677	0.0672	0.0685	0.0678	0.0675	0.0678	0.0677
490	0.065	0.0657	0.066	0.0664	0.067	0.0662	0.0673	0.067	0.0668	0.0671	0.067
495	0.0641	0.0648	0.0653	0.0657	0.0659	0.0653	0.0664	0.0662	0.066	0.0661	0.0659
500	0.0633	0.0642	0.0647	0.0646	0.0653	0.0647	0.0654	0.0654	0.0651	0.0654	0.065
PC9
x axis	y axis: absorbance
wavelength (nm)	0 min	5 min	10 min	15 min	20 min	25 min	30 min	35 min	40 min	45 min	50 min
300	0.7028	0.6993	0.697	0.6943	0.6935	0.6888	0.6905	0.6927	0.6897	0.6854	0.6878
305	0.6566	0.6552	0.6534	0.6504	0.6515	0.6464	0.6491	0.6525	0.6504	0.6451	0.6437
310	0.6343	0.6358	0.634	0.6319	0.6319	0.6303	0.6311	0.6338	0.6339	0.6277	0.6237
315	0.6246	0.628	0.6275	0.6281	0.6273	0.6223	0.6244	0.6275	0.6207	0.6182	0.6172
320	0.6287	0.6326	0.634	0.635	0.6339	0.6307	0.631	0.6321	0.6284	0.6275	0.6236
325	0.6221	0.6343	0.6393	0.6382	0.6366	0.6342	0.6299	0.6356	0.6337	0.6289	0.63
330	0.6303	0.6369	0.6431	0.643	0.6423	0.6393	0.6415	0.64	0.6365	0.6348	0.6338
335	0.6313	0.6398	0.6474	0.6476	0.647	0.6458	0.6463	0.6433	0.6417	0.639	0.6353
340	0.6302	0.6405	0.6482	0.6493	0.6488	0.6478	0.6461	0.6471	0.6446	0.6429	0.6379
345	0.6176	0.6329	0.6413	0.6428	0.6414	0.6432	0.6391	0.6419	0.6399	0.6376	0.6379
350	0.6069	0.6181	0.6268	0.6299	0.6308	0.6301	0.6295	0.6297	0.6277	0.6269	0.6221
355	0.579	0.5911	0.6006	0.604	0.6056	0.6059	0.6056	0.605	0.6034	0.6022	0.6005
360	0.5496	0.5608	0.5693	0.5739	0.5758	0.5763	0.5789	0.5767	0.5761	0.5753	0.5714
365	0.5143	0.5256	0.5334	0.5378	0.5402	0.5414	0.5413	0.542	0.5415	0.5413	0.5423
370	0.4749	0.4847	0.4922	0.496	0.4989	0.5009	0.5009	0.5024	0.5023	0.5015	0.5054
375	0.42	0.4269	0.4333	0.4367	0.4401	0.4423	0.4423	0.4437	0.4447	0.4451	0.4478
380	0.3793	0.3837	0.3894	0.3928	0.3959	0.3955	0.4001	0.4004	0.4012	0.4016	0.401
385	0.3406	0.3433	0.3481	0.3516	0.3549	0.357	0.3591	0.3602	0.3613	0.3615	0.3612
390	0.3059	0.3081	0.3121	0.3153	0.3181	0.3208	0.3233	0.3237	0.3251	0.3249	0.3244
395	0.2765	0.2774	0.2804	0.2834	0.2867	0.2894	0.2914	0.2926	0.2942	0.2944	0.2933
400	0.2534	0.2536	0.2563	0.2594	0.2622	0.2649	0.2675	0.2685	0.27	0.27	0.2692
405	0.2299	0.2301	0.2329	0.2358	0.2389	0.2413	0.2437	0.2444	0.246	0.2469	0.2456
410	0.213	0.213	0.2161	0.2185	0.2215	0.224	0.2265	0.2272	0.2287	0.2292	0.2281
415	0.1984	0.1983	0.2007	0.2033	0.2062	0.2085	0.2108	0.212	0.213	0.2136	0.2127
420	0.1889	0.1885	0.1909	0.1934	0.194	0.1986	0.201	0.1994	0.2039	0.2032	0.2026
425	0.1797	0.1795	0.182	0.1841	0.1873	0.1891	0.1909	0.1921	0.1926	0.1933	0.1925
430	0.1744	0.1739	0.1763	0.1781	0.1802	0.1831	0.1848	0.1847	0.1873	0.1867	0.1845
435	0.167	0.1668	0.1684	0.1705	0.1732	0.175	0.1766	0.1776	0.1793	0.1787	0.1784
440	0.1624	0.1619	0.1629	0.1651	0.1669	0.169	0.1711	0.1718	0.1714	0.1714	0.1719
445	0.1565	0.1556	0.1572	0.1593	0.161	0.1624	0.164	0.1646	0.1661	0.1665	0.1644
450	0.1518	0.1516	0.1524	0.154	0.1552	0.1572	0.1589	0.1585	0.1594	0.1595	0.159
455	0.1471	0.1465	0.1477	0.149	0.1511	0.1515	0.1532	0.1541	0.1546	0.155	0.1537
460	0.1423	0.1413	0.1426	0.1439	0.1453	0.1461	0.1478	0.148	0.1492	0.1492	0.1479
465	0.1393	0.1385	0.1392	0.1401	0.1416	0.1424	0.1438	0.1436	0.1444	0.1444	0.1438
470	0.1365	0.1357	0.1361	0.1368	0.1382	0.1394	0.1404	0.14	0.1408	0.1407	0.1404
475	0.1321	0.1312	0.1317	0.1328	0.1337	0.1345	0.1357	0.1354	0.1363	0.1365	0.1356
480	0.1281	0.1271	0.1281	0.1289	0.13	0.1302	0.1312	0.1316	0.1324	0.1329	0.131
485	0.126	0.1251	0.1251	0.1257	0.126	0.1278	0.1287	0.1282	0.1288	0.1286	0.1284
490	0.1236	0.1225	0.1226	0.1233	0.124	0.1249	0.1256	0.1256	0.1263	0.1263	0.1253
495	0.1212	0.12	0.1201	0.121	0.1216	0.1226	0.1233	0.1232	0.1237	0.1239	0.1227
500	0.1187	0.1174	0.1178	0.1186	0.1188	0.1197	0.1207	0.1204	0.1212	0.1214	0.1199
505	0.1159	0.1148	0.115	0.1155	0.116	0.117	0.1175	0.1176	0.1183	0.1182	0.117
510	0.1138	0.1127	0.1128	0.1133	0.1139	0.1148	0.1154	0.1151	0.1157	0.1159	0.115
515	0.1116	0.1106	0.1105	0.1114	0.1116	0.1127	0.1132	0.113	0.1136	0.1138	0.1127
520	0.1096	0.1086	0.1085	0.1088	0.1094	0.1108	0.1114	0.1107	0.1113	0.1113	0.1108
525	0.1075	0.1064	0.1065	0.1071	0.1075	0.1084	0.109	0.1087	0.1091	0.1092	0.1084
530	0.1058	0.1047	0.1048	0.1054	0.1057	0.1064	0.107	0.1069	0.1074	0.1076	0.1066
535	0.104	0.1031	0.1032	0.1038	0.1042	0.105	0.1058	0.1056	0.1058	0.1064	0.1051
540	0.1024	0.1015	0.1017	0.1017	0.1028	0.1036	0.1042	0.104	0.1043	0.1041	0.1037
545	0.1011	0.1001	0.1001	0.1005	0.1012	0.1019	0.1024	0.1022	0.1027	0.1029	0.1019
550	0.0997	0.0987	0.0988	0.0991	0.0998	0.1007	0.1012	0.1008	0.1014	0.1014	0.1008
555	0.0982	0.0972	0.0971	0.0978	0.0983	0.099	0.0994	0.0994	0.0998	0.1	0.0991
560	0.0968	0.0959	0.0959	0.0966	0.097	0.0978	0.0983	0.098	0.0984	0.0988	0.0976
565	0.0955	0.0944	0.0945	0.095	0.0955	0.0962	0.0967	0.0968	0.097	0.0971	0.0962
570	0.0938	0.0928	0.0928	0.0934	0.0939	0.0945	0.0954	0.0953	0.0954	0.0956	0.0947
575	0.0923	0.0916	0.0916	0.0921	0.0924	0.0933	0.0939	0.0937	0.0938	0.0943	0.0934
580	0.0914	0.0906	0.0904	0.0909	0.0913	0.0922	0.0929	0.0927	0.0932	0.0931	0.0922
585	0.09	0.0893	0.0892	0.0899	0.0902	0.091	0.0914	0.0915	0.0918	0.0919	0.091
590	0.089	0.0882	0.0878	0.0888	0.0891	0.0898	0.0904	0.0902	0.0906	0.0907	0.0899
595	0.0876	0.0868	0.0867	0.0875	0.0879	0.0885	0.0891	0.0891	0.0893	0.0896	0.0887
600	0.087	0.0861	0.0857	0.0867	0.0871	0.0879	0.0883	0.0883	0.0886	0.0887	0.0879
605	0.0859	0.085	0.0849	0.0857	0.0859	0.0867	0.0871	0.0871	0.0875	0.0879	0.087
610	0.085	0.0843	0.0841	0.085	0.0853	0.0859	0.0863	0.0864	0.0867	0.0868	0.0863
615	0.0841	0.083	0.083	0.0837	0.0839	0.0849	0.085	0.0852	0.0855	0.0856	0.0849
620	0.0832	0.0824	0.0823	0.0829	0.0835	0.0839	0.0845	0.0845	0.0847	0.0847	0.0843
625	0.0821	0.0813	0.0811	0.082	0.0823	0.0831	0.0835	0.0834	0.0837	0.084	0.0832
630	0.0812	0.0805	0.0804	0.0811	0.0817	0.082	0.0828	0.0829	0.0831	0.0831	0.0824
635	0.0805	0.0797	0.0795	0.0802	0.0807	0.0814	0.0818	0.0818	0.0821	0.0824	0.0815
640	0.0801	0.079	0.0787	0.0796	0.08	0.0807	0.0812	0.0811	0.0812	0.0817	0.0807
645	0.0788	0.078	0.0779	0.0786	0.0791	0.0799	0.0805	0.0804	0.0805	0.0806	0.0798
650	0.0782	0.0774	0.0772	0.0779	0.0784	0.0791	0.0796	0.0796	0.0798	0.08	0.0791
655	0.0773	0.0765	0.0765	0.0771	0.0775	0.0784	0.0787	0.0783	0.0787	0.0792	0.0783
660	0.0769	0.0759	0.0758	0.0765	0.077	0.0775	0.078	0.0778	0.0781	0.0786	0.0778
665	0.0762	0.0754	0.0749	0.0756	0.0763	0.0767	0.0774	0.0772	0.0776	0.0779	0.0768
670	0.0754	0.0745	0.0745	0.0753	0.0755	0.0763	0.0764	0.0766	0.077	0.0771	0.0763
675	0.0746	0.0736	0.0737	0.0744	0.0749	0.0755	0.076	0.0761	0.0763	0.0765	0.0756
680	0.0743	0.0735	0.0733	0.0739	0.0746	0.0747	0.0751	0.0757	0.0758	0.0759	0.075
685	0.0737	0.0727	0.0727	0.0732	0.0738	0.0742	0.0749	0.0749	0.075	0.0751	0.0745
690	0.0732	0.0722	0.0719	0.0727	0.0732	0.0738	0.0742	0.0743	0.0746	0.0747	0.0738
695	0.0723	0.0716	0.0713	0.072	0.0727	0.0734	0.0734	0.0737	0.0738	0.074	0.0732
700	0.0721	0.0712	0.071	0.0717	0.072	0.0728	0.0734	0.0733	0.0732	0.0738	0.0728
705	0.072	0.0709	0.0707	0.0713	0.0717	0.0725	0.0731	0.0732	0.0728	0.0733	0.0724
710	0.0716	0.0707	0.0707	0.0712	0.0718	0.0725	0.0729	0.0728	0.0729	0.0733	0.0724
715	0.0718	0.0705	0.0705	0.0713	0.0716	0.0723	0.0728	0.0728	0.0729	0.0733	0.0724
720	0.0719	0.0709	0.0709	0.0714	0.072	0.0724	0.0731	0.0733	0.0733	0.0736	0.0727
725	0.0722	0.0713	0.0713	0.072	0.0723	0.0731	0.0735	0.0734	0.0737	0.0742	0.0728
730	0.073	0.0724	0.0722	0.0727	0.0734	0.074	0.0743	0.0745	0.0744	0.0749	0.0739
735	0.0746	0.0735	0.0736	0.0742	0.0748	0.0753	0.0757	0.0757	0.0759	0.0759	0.0752
740	0.0755	0.0746	0.0747	0.0754	0.0758	0.0764	0.0771	0.0772	0.0769	0.0775	0.0764
745	0.0754	0.0745	0.0747	0.0752	0.0758	0.0764	0.0769	0.077	0.0773	0.0773	0.0765
750	0.0752	0.0743	0.0745	0.0751	0.0757	0.0763	0.0766	0.0767	0.0768	0.0772	0.0763
755	0.0746	0.074	0.0738	0.0745	0.0751	0.0755	0.0758	0.0762	0.0763	0.0765	0.0756
760	0.0744	0.0732	0.0735	0.074	0.0745	0.0753	0.0758	0.0753	0.0758	0.0761	0.0753
765	0.0737	0.0729	0.0731	0.0735	0.074	0.0746	0.0752	0.0752	0.0754	0.0755	0.0747
770	0.0735	0.0726	0.0725	0.0731	0.0735	0.0741	0.0748	0.0747	0.0751	0.075	0.0742
775	0.0728	0.0718	0.0719	0.0724	0.0729	0.0737	0.0739	0.074	0.0741	0.0745	0.0735
780	0.072	0.0712	0.0712	0.0716	0.0722	0.0728	0.0732	0.0731	0.0736	0.0736	0.0728
785	0.0714	0.0704	0.0702	0.0708	0.0713	0.072	0.0722	0.0725	0.0726	0.0731	0.0719
790	0.0704	0.0697	0.0694	0.07	0.0707	0.0711	0.0715	0.0717	0.0718	0.072	0.0711
795	0.0696	0.0685	0.0686	0.0692	0.0696	0.0704	0.0706	0.0707	0.071	0.0712	0.0703
800	0.0689	0.0678	0.0678	0.0683	0.0688	0.0694	0.07	0.0699	0.07	0.0702	0.0693
805	0.0681	0.0671	0.067	0.0677	0.0682	0.0686	0.0694	0.0692	0.0693	0.0695	0.0689
810	0.0676	0.0666	0.0667	0.0671	0.0677	0.0684	0.0688	0.0687	0.0688	0.0687	0.0681
815	0.0668	0.0664	0.0663	0.0668	0.0676	0.068	0.0684	0.0684	0.0685	0.0687	0.068
820	0.0675	0.0665	0.0664	0.0673	0.0675	0.0683	0.0686	0.0688	0.069	0.0689	0.0682
825	0.0674	0.0668	0.0667	0.0673	0.0678	0.0683	0.0684	0.0688	0.0689	0.069	0.0684
830	0.0671	0.0682	0.0679	0.0684	0.0691	0.0696	0.0706	0.0699	0.07	0.0703	0.0697
835	0.0702	0.0696	0.0698	0.0702	0.0708	0.0714	0.0718	0.0716	0.0719	0.072	0.0715
840	0.0716	0.0711	0.0711	0.0715	0.0721	0.0727	0.0731	0.073	0.0732	0.0734	0.0728
845	0.0722	0.0716	0.0714	0.0721	0.0725	0.0732	0.0735	0.0734	0.0736	0.0737	0.0733
850	0.0725	0.0717	0.0718	0.0725	0.0728	0.0734	0.0738	0.0738	0.0738	0.0739	0.0736

## Sheet: Fig1-supp13
Fig1-S13. Fluorescence spectra of the reactants
PC5 (Ex: 400 nm)
x axis	y axis: RFU
wavelength (nm)	0 min	5 min	10 min	15 min	20 min	25 min	30 min	35 min	40 min	45 min	50 min
430	301	325	350	317	317	308	300	300	292	276	277
435	289	307	308	292	301	288	283	282	268	260	272
440	348	363	342	358	344	337	336	334	329	317	315
445	431	464	460	465	465	458	448	426	434	419	439
450	559	603	602	613	595	586	585	579	576	589	577
455	700	758	777	780	791	782	790	773	765	760	739
460	906	1035	1062	1088	1104	1127	1115	1103	1047	1023	1058
465	1137	1312	1326	1425	1443	1434	1439	1455	1386	1364	1422
470	1392	1623	1728	1762	1808	1869	1867	1881	1873	1836	1853
475	1666	1963	2080	2200	2253	2349	2359	2389	2311	2339	2344
480	2013	2311	2493	2738	2833	2906	2960	2975	2985	2977	2985
485	2308	2676	2945	3261	3405	3522	3593	3642	3614	3649	3697
490	2603	2978	3435	3782	4012	4192	4295	4346	4402	4436	4441
495	2879	3309	3876	4322	4618	4868	5014	5106	5147	5215	5198
500	3076	3574	4226	4734	5216	5476	5616	5727	5794	5862	5847
505	3217	3734	4477	5218	5625	5956	6206	6328	6347	6480	6485
510	3318	3950	4828	5576	6093	6472	6755	6932	6998	7135	7142
515	3422	4026	4967	5858	6458	6898	7126	7419	7485	7566	7600
520	3358	4073	5058	6003	6648	7126	7403	7621	7767	7852	7899
525	3390	4079	5119	6076	6827	7264	7553	7877	7978	8052	8116
530	3288	3958	5058	6048	6721	7310	7637	7888	7969	8077	8092
535	3175	3809	4917	5881	6578	7103	7404	7643	7839	7975	7973
540	2990	3662	4675	5663	6319	6832	7151	7412	7533	7698	7722
545	2792	3446	4511	5368	6020	6586	6857	7128	7216	7282	7307
550	2725	3250	4238	5087	5721	6278	6518	6716	6838	6960	6961
555	2505	3021	3922	4646	5256	5703	5944	6159	6278	6374	6416
560	2367	2784	3608	4391	4918	5284	5509	5694	5820	5841	5917
565	2179	2576	3334	4050	4502	4849	5050	5206	5353	5374	5457
570	2014	2377	3162	3741	4223	4479	4752	4912	4957	5005	5020
575	1871	2234	2915	3420	3797	4132	4306	4465	4541	4547	4637
580	1725	2048	2603	3115	3514	3773	3868	3999	4152	4065	4160
585	1637	1857	2376	2837	3148	3354	3495	3636	3679	3683	3790
590	1488	1701	2158	2538	2855	3086	3137	3260	3307	3334	3377
595	1334	1529	1930	2318	2537	2723	2871	2878	2964	3009	2998
600	1245	1419	1803	2148	2390	2529	2623	2687	2746	2764	2751
605	1107	1278	1607	1892	2125	2271	2337	2388	2385	2413	2346
610	1028	1180	1463	1682	1863	1998	2049	2088	2170	2168	2150
615	933	1051	1325	1522	1702	1793	1869	1892	1950	1957	1971
620	864	984	1192	1377	1535	1615	1699	1705	1749	1730	1720
625	819	915	1117	1264	1359	1483	1545	1560	1542	1574	1614
630	722	833	969	1161	1226	1338	1351	1384	1412	1401	1396
635	655	734	909	1035	1126	1153	1209	1207	1249	1217	1205
640	608	713	836	914	955	1070	1054	1067	1136	1099	1138
645	559	638	758	872	1001	969	1009	1008	1017	968	1026
650	496	568	696	749	784	857	861	865	879	896	869
655	484	535	626	684	754	814	797	808	785	817	799
660	446	518	578	663	720	705	703	709	746	728	706
665	414	474	526	582	657	656	650	698	682	702	700
670	390	427	511	560	615	629	635	620	615	616	618
675	361	410	495	512	553	550	529	597	581	591	587
680	358	407	403	484	465	472	558	542	512	536	489
685	344	356	378	450	470	461	477	483	476	445	475
690	291	352	388	454	442	468	466	451	438	435	483
695	268	328	346	392	410	415	440	404	403	417	420
700	235	298	355	347	379	371	420	391	339	380	373
705	233	292	303	327	357	372	336	342	383	364	332
710	215	229	284	270	307	305	336	327	299	338	316
715	223	202	254	286	317	278	261	332	299	281	313
720	183	222	247	288	273	262	275	284	320	265	277
725	183	199	230	263	257	237	302	239	285	275	240
730	174	197	217	233	225	225	225	247	236	244	221
735	146	193	228	235	237	230	220	202	259	242	211
740	135	194	206	222	215	219	213	195	234	255	202
745	133	176	200	184	187	206	207	210	184	206	174
750	115	162	218	207	197	186	185	182	204	190	172
755	107	162	159	209	189	204	211	195	180	172	204
760	149	166	169	171	195	182	180	196	204	165	163
765	91	162	175	186	194	175	180	183	161	206	189
770	105	161	136	187	196	167	173	190	198	211	166
775	72	154	159	175	204	189	202	158	188	171	210
780	130	131	144	165	171	162	227	193	213	186	190
785	70	150	161	154	208	216	202	164	178	194	187
790	138	156	156	142	173	178	206	182	231	188	191
795	118	163	184	209	224	181	211	159	226	198	212
800	89	162	167	172	190	205	205	201	194	161	203
PC6 (Ex: 390 nm)
x axis	y axis: RFU
wavelength (nm)	0 min	5 min	10 min	15 min	20 min	25 min	30 min	35 min	40 min	45 min	50 min
420	363	375	355	349	331	333	310	311	317	292	298
425	346	360	367	364	351	347	325	327	330	312	311
430	376	409	420	410	418	403	407	377	389	389	381
435	462	486	510	524	542	516	519	519	513	504	505
440	533	605	654	693	723	748	721	747	748	721	734
445	675	770	863	979	1033	1088	1131	1133	1164	1146	1132
450	794	934	1145	1331	1444	1546	1658	1645	1679	1695	1656
455	913	1138	1508	1788	2030	2184	2318	2408	2400	2381	2391
460	1096	1494	2123	2661	3121	3431	3367	3814	3851	3559	3817
465	1289	1914	2877	3746	4461	4883	5167	5477	5528	5144	5535
470	1490	2395	3812	4969	6101	6655	7218	7672	7590	7604	7635
475	1665	2996	4908	6638	8086	8897	9704	10293	10204	10202	10186
480	1873	3679	6298	8728	10538	11984	13067	13581	13791	13908	13646
485	2042	4368	7793	10921	13460	15205	16277	17343	17646	17362	17514
490	2187	5103	9476	13324	16487	18734	20536	21403	21714	21752	21761
495	2270	5873	11166	15905	19640	22265	24517	25733	26073	26050	25918
500	2279	6420	12425	17933	22431	25329	27907	29143	29810	29750	29590
505	2241	6955	13700	19875	24797	28008	30894	32292	32947	32916	32805
510	2215	7341	14904	21484	26888	30620	33658	35119	35867	35808	35842
515	2145	7597	15495	22642	28371	32224	35506	37104	37968	37973	37723
520	1991	7662	15903	23253	28990	33079	36368	38149	38829	38876	38936
525	1838	7577	15910	23341	29123	33215	36433	38442	39182	39369	38816
530	1667	7392	15525	22849	28627	32485	35947	37674	38198	38414	38358
535	1545	7015	14882	22101	27579	31577	34659	36223	37028	37147	36866
540	1341	6593	13902	20575	25936	29697	32637	34249	34781	34848	34937
545	1180	6070	13049	19238	24073	27611	30460	31903	32270	32566	32433
550	1048	5606	12101	17967	22442	25637	28373	29577	30059	30181	30176
555	881	4999	10669	15965	20031	22711	25089	26360	26752	26968	26722
560	765	4420	9560	14156	17854	20462	22493	23463	24113	24100	24059
565	670	3906	8496	12599	15859	18133	19913	21034	21296	21384	21294
570	580	3476	7490	11252	14230	16132	17891	18629	19097	19000	18914
575	487	3078	6719	9908	12423	14261	15787	16516	16718	16811	16700
580	444	2631	5744	8421	10698	12175	13441	14098	14441	14372	14286
585	366	2256	4913	7234	9177	10474	11590	12139	12322	12300	12295
590	308	1949	4154	6111	7772	8878	9816	10320	10480	10536	10411
595	261	1629	3500	5174	6548	7438	8285	8664	8848	8777	8709
600	232	1453	3061	4582	5802	6577	7261	7592	7797	7804	7816
605	183	1176	2570	3738	4810	5449	6009	6251	6338	6415	6265
610	158	992	2121	3177	3907	4518	4934	5191	5300	5288	5271
615	143	839	1771	2638	3296	3733	4250	4364	4502	4456	4498
620	128	698	1464	2243	2729	3166	3473	3671	3781	3779	3684
625	114	619	1320	1919	2317	2696	2938	3130	3211	3236	3150
630	89	517	1093	1544	1969	2201	2459	2612	2689	2690	2669
635	77	428	872	1314	1627	1846	2045	2169	2148	2194	2194
640	68	362	747	1077	1402	1594	1667	1793	1842	1894	1860
645	60	336	685	950	1190	1389	1517	1607	1639	1549	1631
650	60	249	517	786	936	1104	1262	1266	1307	1297	1288
655	46	243	485	686	855	935	1008	1118	1122	1106	1126
660	45	208	390	590	723	805	916	962	979	963	940
665	38	181	372	500	634	687	779	841	800	807	807
670	31	153	320	447	531	634	692	701	699	739	722
675	41	148	279	372	468	532	542	619	601	623	629
680	26	134	219	333	394	450	481	530	528	551	514
685	38	111	216	269	302	387	450	459	444	424	442
690	17	120	191	260	330	381	397	372	402	383	403
695	19	116	184	218	245	294	339	360	326	371	342
700	32	80	145	203	234	302	284	298	299	306	298
PC7 (Ex: 340 nm)
x axis	y axis: RFU
wavelength (nm)	0 min	5 min	10 min	15 min	20 min	25 min	30 min	35 min	40 min	45 min	50 min
370	891	831	769	697	674	632	619	594	551	530	534
375	923	893	812	720	675	662	610	605	581	546	535
380	986	967	907	823	781	743	749	714	673	652	648
385	1053	1016	967	887	865	836	817	811	779	756	761
390	1068	1087	1035	986	987	942	946	923	919	893	892
395	1081	1133	1120	1088	1075	1083	1087	1080	1066	1050	1046
400	1056	1178	1167	1181	1190	1212	1209	1209	1198	1204	1217
405	980	1091	1163	1182	1233	1249	1263	1280	1291	1301	1305
410	956	1153	1252	1292	1373	1411	1458	1488	1505	1525	1544
415	928	1229	1344	1427	1469	1551	1597	1645	1709	1739	1742
420	940	1266	1429	1555	1626	1737	1767	1812	1834	1922	1907
425	940	1311	1528	1653	1753	1869	1979	2022	2048	2093	2112
430	935	1358	1599	1733	1843	1980	2046	2140	2199	2200	2229
435	894	1383	1651	1797	1939	2029	2151	2216	2268	2301	2342
440	866	1373	1662	1851	1963	2133	2189	2268	2343	2383	2416
445	883	1392	1664	1845	2019	2138	2233	2304	2361	2408	2448
450	851	1377	1640	1851	1995	2133	2267	2304	2358	2409	2455
455	825	1370	1631	1806	1997	2112	2218	2275	2355	2391	2432
460	799	1321	1624	1798	1955	2087	2194	2249	2339	2325	2360
465	759	1287	1574	1782	1894	2040	2149	2224	2258	2304	2363
470	743	1261	1526	1741	1897	1996	2103	2195	2208	2270	2313
475	693	1206	1504	1689	1822	1970	2028	2107	2173	2222	2265
480	678	1158	1430	1625	1787	1893	1999	2028	2124	2169	2187
485	638	1122	1391	1575	1723	1848	1913	2006	2093	2085	2131
490	617	1072	1316	1546	1646	1760	1859	1941	1975	2047	2065
495	570	995	1268	1455	1560	1704	1764	1840	1940	1966	1994
500	542	956	1207	1379	1529	1647	1709	1817	1862	1908	1936
505	511	916	1147	1328	1451	1571	1650	1728	1798	1844	1889
510	468	838	1063	1268	1375	1481	1572	1648	1701	1757	1765
515	443	787	995	1163	1280	1395	1472	1534	1619	1678	1687
520	412	762	946	1106	1208	1353	1436	1484	1517	1561	1587
525	372	667	854	1014	1141	1258	1296	1391	1442	1468	1508
530	346	635	802	920	1038	1131	1191	1268	1323	1361	1384
535	311	571	719	864	953	1052	1105	1179	1228	1256	1269
540	291	543	665	784	857	953	1023	1076	1125	1143	1157
545	257	482	601	714	792	866	924	965	1011	1018	1053
550	251	428	539	651	719	809	851	862	923	965	972
555	224	394	489	574	642	709	730	773	821	863	853
560	194	353	439	507	575	622	666	701	731	743	769
565	179	320	405	459	524	553	604	642	669	686	698
570	162	281	360	423	480	517	555	571	581	625	621
575	147	271	327	396	414	475	493	521	527	556	565
580	136	241	298	347	370	417	441	460	467	483	498
585	131	218	274	308	353	378	401	417	422	440	444
590	112	185	236	282	295	320	330	359	370	391	384
595	95	176	218	246	254	280	292	316	334	337	333
600	95	163	189	219	227	255	270	254	299	310	301
605	87	142	169	195	223	218	238	252	265	257	262
610	84	131	153	181	189	218	211	219	220	238	228
615	74	116	135	151	179	177	195	186	201	204	208
620	62	109	124	157	147	152	169	172	181	169	182
625	61	104	104	126	142	137	152	155	168	166	162
630	62	100	101	118	126	125	137	139	143	147	153
635	52	75	86	108	109	115	123	120	128	126	124
640	42	76	94	100	100	111	117	111	118	117	121
645	49	73	78	90	100	107	114	103	110	111	111
650	34	70	89	85	81	95	101	102	91	99	93
655	37	58	73	78	93	90	88	98	99	97	80
660	34	69	75	81	74	72	79	75	90	95	93
665	37	73	68	69	85	84	84	88	86	83	85
670	52	52	71	71	78	71	76	82	75	96	86
675	50	58	81	68	72	96	74	78	88	91	87
680	41	69	65	72	97	74	76	75	83	83	84
685	42	63	66	69	79	68	86	88	83	67	81
690	32	50	67	67	73	81	73	69	65	89	72
695	38	54	65	89	73	77	73	79	66	83	78
700	43	67	63	73	63	83	65	78	66	81	72
705	40	73	56	63	77	82	68	74	76	74	79
710	28	55	68	57	65	78	68	75	80	63	76
715	27	60	68	68	64	80	72	73	68	76	73
720	22	80	64	65	52	62	62	61	57	66	75
725	29	62	55	72	76	81	53	63	76	68	76
730	41	63	50	47	73	60	53	63	66	78	69
735	13	44	73	82	66	65	75	70	75	63	62
740	27	51	61	75	67	68	62	62	65	74	76
745	50	73	77	61	75	61	73	51	73	81	86
750	38	72	66	77	87	64	66	63	77	62	90
755	53	59	69	48	74	73	79	77	84	83	78
760	18	64	65	68	77	66	71	89	77	85	95
765	40	74	72	86	84	81	61	88	85	100	80
770	37	62	73	83	82	90	96	118	90	106	99
775	29	90	83	81	96	97	94	111	78	117	95
780	37	63	94	115	105	103	82	115	99	106	113
785	57	96	99	118	110	116	85	93	94	122	118
790	51	94	117	110	95	102	144	108	116	91	107
795	62	98	115	93	130	147	88	83	114	124	150
800	45	123	135	134	131	145	102	116	137	130	132
PC8 (Ex: 375 nm)
x axis	y axis: RFU
wavelength (nm)	0 min	5 min	10 min	15 min	20 min	25 min	30 min	35 min	40 min	45 min	50 min
405	298	298	303	299	302	295	290	281	289	282	277
410	253	282	305	319	316	310	314	314	320	310	286
415	297	352	365	393	397	415	426	444	421	417	428
420	349	417	453	511	532	552	576	585	574	594	576
425	406	508	596	672	719	793	818	844	853	861	870
430	443	585	725	836	946	1037	1106	1163	1180	1194	1200
435	484	668	843	1043	1263	1403	1522	1604	1634	1692	1649
440	508	743	1023	1320	1610	1837	2005	2148	2227	2237	2246
445	558	848	1233	1711	2043	2383	2648	2829	2971	3010	3107
450	585	940	1412	2022	2531	2946	3282	3526	3725	3749	3778
455	624	1035	1643	2381	2956	3498	3928	4233	4455	4581	4629
460	647	1151	1883	2817	3576	4264	4789	5164	5446	5609	5663
465	658	1246	2103	3124	4026	4833	5473	5864	6174	6437	6514
470	671	1294	2267	3445	4443	5327	5989	6544	6839	7098	7285
475	670	1368	2408	3703	4801	5769	6477	7008	7459	7716	7843
480	681	1354	2492	3879	5071	6131	6896	7479	7990	8168	8392
485	635	1391	2586	4020	5242	6320	7129	7743	8177	8511	8633
490	617	1371	2558	4005	5237	6366	7240	7859	8281	8511	8776
495	571	1310	2483	3914	5159	6239	7037	7729	8226	8460	8634
500	534	1253	2415	3811	5021	6139	6924	7504	8011	8214	8467
505	494	1205	2321	3683	4854	5893	6687	7275	7691	7918	8169
510	459	1102	2164	3424	4490	5506	6261	6843	7150	7436	7583
515	413	1019	1970	3153	4164	5066	5711	6277	6705	6852	7008
520	364	950	1863	2908	3848	4681	5326	5847	6112	6344	6463
525	343	878	1684	2676	3510	4276	4850	5286	5558	5778	5958
530	300	778	1508	2370	3106	3814	4343	4709	4963	5148	5250
535	267	688	1335	2109	2830	3380	3865	4217	4408	4547	4684
540	228	617	1178	1856	2474	2929	3324	3641	3873	4003	4090
545	206	533	1041	1618	2139	2605	2935	3238	3387	3482	3589
550	198	492	952	1438	1925	2275	2571	2826	3038	3073	3180
555	164	420	786	1224	1618	1920	2174	2411	2551	2637	2677
560	144	367	702	1062	1391	1668	1880	2110	2194	2237	2329
565	137	320	615	924	1199	1426	1654	1795	1915	1947	2013
570	116	287	535	821	1061	1267	1439	1531	1631	1697	1721
575	104	260	465	721	932	1104	1231	1369	1423	1489	1486
580	96	234	418	603	786	957	1038	1163	1220	1233	1264
585	80	199	355	516	687	816	906	987	1032	1064	1079
590	81	172	309	446	579	709	758	847	895	890	956
595	73	150	254	398	490	603	646	702	736	769	778
600	62	139	232	340	440	516	594	651	664	708	713
605	59	114	201	299	382	446	467	521	558	575	589
610	52	107	170	254	329	376	428	442	467	488	514
615	49	102	162	221	283	341	369	389	405	426	422
620	42	88	148	195	246	284	307	341	352	384	365
625	40	80	141	178	226	266	297	295	325	326	332
630	41	74	121	159	191	228	248	268	286	297	290
635	35	68	105	150	171	215	213	243	240	243	248
640	30	66	89	127	157	185	193	234	224	219	227
645	26	55	91	126	135	163	176	214	214	195	212
650	27	69	80	115	131	146	168	162	185	190	187
655	28	55	75	98	118	127	161	157	163	181	195
660	28	48	78	88	109	149	150	143	151	162	172
665	25	58	71	89	119	127	148	147	142	147	165
670	33	50	72	87	105	113	105	151	145	155	143
675	27	55	78	89	92	119	120	135	139	135	143
680	26	48	70	92	105	125	122	131	143	116	110
685	22	48	60	84	85	101	114	121	127	119	100
690	15	50	74	85	89	102	119	109	122	132	125
695	28	67	70	95	93	93	115	129	139	123	117
700	33	62	73	98	88	104	99	116	116	104	109
