# Supplementary material for: Permeant fluorescent probes visualize the activation of SARM1 and uncover an anti-neurodegenerative drug candidate
Source: eLife. 2021 May 4;10:e67381. doi: 10.7554/eLife.67381 (PMC8143800; doi:10.7554/eLife.67381)
Supplement: Figure 2—figure supplement 1—source data 1. [file elife-67381-fig2-figsupp1-data1.xlsx]

## Sheet: Fig2-supp1B
		Fig2-s1B. The fluorescence of PAD6 was analyzed in the flow cytometry
	X axis	y axis: RFU
	Time (h)	293			CD38			mutCD38
	0	2880	3089	3093	3173	3539	3517	3657	3902	3903
	12	4465	4682	5330	4702	4766	5070	4817	4987	4088
	24	5307	5658	5486	5416	5548	5596	5048	5498	5448
	48	5460	5998	5955	6043	6467	6394	5772	6276	6048

## Sheet: Fig2-supp1C
			Fig2-s1C. The cellular cADPR levels in the cells
				pmol cADPR/mg protein
			293	-0.03824	0.003295	-0.02919
			CD38	32.4218	32.0641	32.5725
			mutCD38	4.33909	4.20461	4.27977
