# Supplementary material for: Permeant fluorescent probes visualize the activation of SARM1 and uncover an anti-neurodegenerative drug candidate
Source: eLife. 2021 May 4;10:e67381. doi: 10.7554/eLife.67381 (PMC8143800; doi:10.7554/eLife.67381)
Supplement: Figure 2—source data 1. [file elife-67381-fig2-data1.xlsx]

## Sheet: 2C
		Fig 2C. HPLC analysis of PAD6 from cells
		SARM1-E642A			SARM1-OE
		Time (min)	mAU (390 nm)		Time (min)	mAU (390 nm)
		0.000417	-0.0518		0.0303	0.01049
		0.00375	-0.05239		0.033633	0.009835
		0.007083	-0.05299		0.036967	0.009477
		0.010417	-0.05352		0.0403	0.009537
		0.01375	-0.05412		0.043633	0.010014
		0.017083	-0.05472		0.046967	0.010967
		0.020417	-0.05537		0.0503	0.012219
		0.02375	-0.05609		0.053633	0.013649
		0.027083	-0.0568		0.056967	0.01514
		0.030417	-0.05746		0.0603	0.01663
		0.03375	-0.05805		0.063633	0.017941
		0.037083	-0.05847		0.066967	0.019014
		0.040417	-0.05871		0.0703	0.019968
		0.04375	-0.05877		0.073633	0.020683
		0.047083	-0.05865		0.076967	0.021338
		0.050417	-0.05841		0.0803	0.022054
		0.05375	-0.05811		0.083633	0.022888
		0.057083	-0.05782		0.086967	0.023901
		0.060417	-0.0577		0.0903	0.025034
		0.06375	-0.05776		0.093633	0.026166
		0.067083	-0.05811		0.096967	0.027239
		0.070417	-0.05877		0.1003	0.028193
		0.07375	-0.0596		0.103633	0.028908
		0.077083	-0.06068		0.106967	0.029385
		0.080417	-0.06181		0.1103	0.029564
		0.08375	-0.06294		0.113633	0.029445
		0.087083	-0.0639		0.116967	0.029027
		0.090417	-0.06455		0.1203	0.028431
		0.09375	-0.06479		0.123633	0.027657
		0.097083	-0.06461		0.126967	0.026882
		0.100417	-0.06407		0.1303	0.026166
		0.10375	-0.06318		0.133633	0.025511
		0.107083	-0.06223		0.136967	0.024915
		0.110417	-0.06121		0.1403	0.024438
		0.11375	-0.06038		0.143633	0.02414
		0.117083	-0.05984		0.146967	0.023961
		0.120417	-0.05972		0.1503	0.024021
		0.12375	-0.06002		0.153633	0.024199
		0.127083	-0.0608		0.156967	0.024438
		0.130417	-0.06187		0.1603	0.024676
		0.13375	-0.06312		0.163633	0.024736
		0.137083	-0.06437		0.166967	0.024557
		0.140417	-0.06545		0.1703	0.02414
		0.14375	-0.06616		0.173633	0.023544
		0.147083	-0.06652		0.176967	0.022769
		0.150417	-0.06646		0.1803	0.021875
		0.15375	-0.06598		0.183633	0.020921
		0.157083	-0.06527		0.186967	0.020087
		0.160417	-0.06437		0.1903	0.019312
		0.16375	-0.06354		0.193633	0.018716
		0.167083	-0.06294		0.196967	0.018418
		0.170417	-0.0627		0.2003	0.018299
		0.17375	-0.06282		0.203633	0.018299
		0.177083	-0.06336		0.206967	0.018418
		0.180417	-0.06419		0.2103	0.018537
		0.18375	-0.06521		0.213633	0.018597
		0.187083	-0.06622		0.216967	0.018656
		0.190417	-0.06711		0.2203	0.018656
		0.19375	-0.06777		0.223633	0.018597
		0.197083	-0.06795		0.226967	0.018537
		0.200417	-0.06759		0.2303	0.018418
		0.20375	-0.06664		0.233633	0.018299
		0.207083	-0.06527		0.236967	0.01812
		0.210417	-0.06354		0.2403	0.018001
		0.21375	-0.06163		0.243633	0.017881
		0.217083	-0.05972		0.246967	0.017822
		0.220417	-0.05794		0.2503	0.017822
		0.22375	-0.05651		0.253633	0.017881
		0.227083	-0.05543		0.256967	0.01812
		0.230417	-0.05484		0.2603	0.018477
		0.23375	-0.05466		0.263633	0.018895
		0.237083	-0.0549		0.266967	0.019431
		0.240417	-0.05531		0.2703	0.020027
		0.24375	-0.05579		0.273633	0.020564
		0.247083	-0.05627		0.276967	0.02116
		0.250417	-0.05651		0.2803	0.021636
		0.25375	-0.05662		0.283633	0.021994
		0.257083	-0.05656		0.286967	0.022113
		0.260417	-0.05639		0.2903	0.021994
		0.26375	-0.05609		0.293633	0.021636
		0.267083	-0.05579		0.296967	0.02116
		0.270417	-0.05555		0.3003	0.020623
		0.27375	-0.05537		0.303633	0.019908
		0.277083	-0.05537		0.306967	0.019193
		0.280417	-0.05543		0.3103	0.018418
		0.28375	-0.05555		0.313633	0.017643
		0.287083	-0.05579		0.316967	0.016987
		0.290417	-0.05603		0.3203	0.016451
		0.29375	-0.05633		0.323633	0.016093
		0.297083	-0.05668		0.326967	0.015855
		0.300417	-0.0571		0.3303	0.015736
		0.30375	-0.05758		0.333633	0.015676
		0.307083	-0.05805		0.336967	0.015795
		0.310417	-0.05841		0.3403	0.016034
		0.31375	-0.05883		0.343633	0.016332
		0.317083	-0.05913		0.346967	0.016749
		0.320417	-0.05943		0.3503	0.017107
		0.32375	-0.05966		0.353633	0.017464
		0.327083	-0.05984		0.356967	0.017762
		0.330417	-0.05996		0.3603	0.01806
		0.33375	-0.06008		0.363633	0.018239
		0.337083	-0.06026		0.366967	0.018477
		0.340417	-0.0605		0.3703	0.018656
		0.34375	-0.06086		0.373633	0.018835
		0.347083	-0.06121		0.376967	0.019073
		0.350417	-0.06163		0.3803	0.019372
		0.35375	-0.06205		0.383633	0.01967
		0.357083	-0.06253		0.386967	0.020027
		0.360417	-0.06288		0.3903	0.020385
		0.36375	-0.06318		0.393633	0.020683
		0.367083	-0.06336		0.396967	0.020742
		0.370417	-0.0633		0.4003	0.020564
		0.37375	-0.06294		0.403633	0.020027
		0.377083	-0.06229		0.406967	0.019252
		0.380417	-0.06133		0.4103	0.018179
		0.38375	-0.06014		0.413633	0.016868
		0.387083	-0.05877		0.416967	0.015557
		0.390417	-0.05734		0.4203	0.014246
		0.39375	-0.05585		0.423633	0.013053
		0.397083	-0.05436		0.426967	0.01204
		0.400417	-0.05305		0.4303	0.011325
		0.40375	-0.05192		0.433633	0.010848
		0.407083	-0.05096		0.436967	0.01061
		0.410417	-0.05031		0.4403	0.01049
		0.41375	-0.04983		0.443633	0.01049
		0.417083	-0.04953		0.446967	0.01049
		0.420417	-0.04941		0.4503	0.01055
		0.42375	-0.04941		0.453633	0.010729
		0.427083	-0.04953		0.456967	0.010908
		0.430417	-0.04983		0.4603	0.011146
		0.43375	-0.05025		0.463633	0.011444
		0.437083	-0.05078		0.466967	0.011921
		0.440417	-0.05144		0.4703	0.012577
		0.44375	-0.05221		0.473633	0.013351
		0.447083	-0.05311		0.476967	0.014186
		0.450417	-0.05394		0.4803	0.01502
		0.45375	-0.05478		0.483633	0.015736
		0.457083	-0.05549		0.486967	0.016451
		0.460417	-0.05615		0.4903	0.017047
		0.46375	-0.05662		0.493633	0.017583
		0.467083	-0.05698		0.496967	0.01806
		0.470417	-0.05716		0.5003	0.018358
		0.47375	-0.05716		0.503633	0.018477
		0.477083	-0.05704		0.506967	0.018477
		0.480417	-0.05674		0.5103	0.018299
		0.48375	-0.05639		0.513633	0.018001
		0.487083	-0.05591		0.516967	0.017583
		0.490417	-0.05531		0.5203	0.017047
		0.49375	-0.0546		0.523633	0.016332
		0.497083	-0.0537		0.526967	0.015557
		0.500417	-0.05281		0.5303	0.014722
		0.50375	-0.05192		0.533633	0.013888
		0.507083	-0.05108		0.536967	0.013173
		0.510417	-0.05037		0.5403	0.012577
		0.51375	-0.04977		0.543633	0.01204
		0.517083	-0.04935		0.546967	0.011623
		0.520417	-0.04911		0.5503	0.011384
		0.52375	-0.04894		0.553633	0.011206
		0.527083	-0.04888		0.556967	0.011206
		0.530417	-0.04882		0.5603	0.011384
		0.53375	-0.0487		0.563633	0.011623
		0.537083	-0.0484		0.566967	0.011921
		0.540417	-0.04804		0.5703	0.012279
		0.54375	-0.04756		0.573633	0.012636
		0.547083	-0.04709		0.576967	0.013053
		0.550417	-0.04667		0.5803	0.013471
		0.55375	-0.04637		0.583633	0.013947
		0.557083	-0.04613		0.586967	0.014484
		0.560417	-0.04607		0.5903	0.01502
		0.56375	-0.04625		0.593633	0.015557
		0.567083	-0.04655		0.596967	0.016034
		0.570417	-0.04709		0.6003	0.016451
		0.57375	-0.04762		0.603633	0.016749
		0.577083	-0.04816		0.606967	0.016928
		0.580417	-0.0487		0.6103	0.016987
		0.58375	-0.04905		0.613633	0.016928
		0.587083	-0.04935		0.616967	0.016809
		0.590417	-0.04947		0.6203	0.01663
		0.59375	-0.04941		0.623633	0.01651
		0.597083	-0.04917		0.626967	0.01651
		0.600417	-0.04876		0.6303	0.016689
		0.60375	-0.04822		0.633633	0.016987
		0.607083	-0.04762		0.636967	0.017285
		0.610417	-0.04703		0.6403	0.017524
		0.61375	-0.04637		0.643633	0.017643
		0.617083	-0.04578		0.646967	0.017583
		0.620417	-0.04512		0.6503	0.017285
		0.62375	-0.04441		0.653633	0.016689
		0.627083	-0.04369		0.656967	0.015736
		0.630417	-0.04286		0.6603	0.014484
		0.63375	-0.04178		0.663633	0.012994
		0.637083	-0.04059		0.666967	0.011444
		0.640417	-0.03922		0.6703	0.009775
		0.64375	-0.03773		0.673633	0.008225
		0.647083	-0.03624		0.676967	0.006735
		0.650417	-0.03481		0.6803	0.005245
		0.65375	-0.0335		0.683633	0.003934
		0.657083	-0.03242		0.686967	0.002682
		0.660417	-0.03171		0.6903	0.001669
		0.66375	-0.03129		0.693633	0.000775
		0.667083	-0.03123		0.696967	0.000119
		0.670417	-0.03147		0.7003	-0.00042
		0.67375	-0.03195		0.703633	-0.00083
		0.677083	-0.03266		0.706967	-0.00107
		0.680417	-0.03344		0.7103	-0.00113
		0.68375	-0.03427		0.713633	-0.00101
		0.687083	-0.03505		0.716967	-0.00077
		0.690417	-0.03576		0.7203	-0.00042
		0.69375	-0.03642		0.723633	-6e-05
		0.697083	-0.03695		0.726967	0.000238
		0.700417	-0.03743		0.7303	0.000536
		0.70375	-0.03779		0.733633	0.000894
		0.707083	-0.03803		0.736967	0.001192
		0.710417	-0.03821		0.7403	0.00155
		0.71375	-0.03821		0.743633	0.001907
		0.717083	-0.03803		0.746967	0.002325
		0.720417	-0.03773		0.7503	0.002801
		0.72375	-0.03725		0.753633	0.003338
		0.727083	-0.03666		0.756967	0.003934
		0.730417	-0.036		0.7603	0.00453
		0.73375	-0.03529		0.763633	0.005007
		0.737083	-0.03475		0.766967	0.005364
		0.740417	-0.03433		0.7703	0.005484
		0.74375	-0.03421		0.773633	0.005364
		0.747083	-0.03433		0.776967	0.005066
		0.750417	-0.03463		0.7803	0.00447
		0.75375	-0.03517		0.783633	0.003695
		0.757083	-0.03582		0.786967	0.002801
		0.760417	-0.03642		0.7903	0.001848
		0.76375	-0.0369		0.793633	0.000954
		0.767083	-0.03725		0.796967	0.000298
		0.770417	-0.03737		0.8003	-0.00024
		0.77375	-0.03719		0.803633	-0.00054
		0.777083	-0.03678		0.806967	-0.00054
		0.780417	-0.03612		0.8103	-0.00036
		0.78375	-0.03535		0.813633	0
		0.787083	-0.03457		0.816967	0.000477
		0.790417	-0.03386		0.8203	0.001013
		0.79375	-0.03332		0.823633	0.00155
		0.797083	-0.03308		0.826967	0.001848
		0.800417	-0.03314		0.8303	0.001967
		0.80375	-0.03344		0.833633	0.001848
		0.807083	-0.03403		0.836967	0.001431
		0.810417	-0.03487		0.8403	0.000775
		0.81375	-0.03582		0.843633	-0.00012
		0.817083	-0.03684		0.846967	-0.00131
		0.820417	-0.03767		0.8503	-0.00268
		0.82375	-0.03827		0.853633	-0.00417
		0.827083	-0.0385		0.856967	-0.00572
		0.830417	-0.03833		0.8603	-0.00715
		0.83375	-0.03785		0.863633	-0.00846
		0.837083	-0.03707		0.866967	-0.00954
		0.840417	-0.03612		0.8703	-0.01031
		0.84375	-0.03511		0.873633	-0.01067
		0.847083	-0.03403		0.876967	-0.01061
		0.850417	-0.03308		0.8803	-0.01013
		0.85375	-0.03225		0.883633	-0.00924
		0.857083	-0.03165		0.886967	-0.00805
		0.860417	-0.03135		0.8903	-0.00668
		0.86375	-0.03129		0.893633	-0.00525
		0.867083	-0.03141		0.896967	-0.00387
		0.870417	-0.03171		0.9003	-0.00268
		0.87375	-0.03207		0.903633	-0.00179
		0.877083	-0.03248		0.906967	-0.00119
		0.880417	-0.03296		0.9103	-0.00089
		0.88375	-0.0335		0.913633	-0.00083
		0.887083	-0.03415		0.916967	-0.00101
		0.890417	-0.03481		0.9203	-0.00125
		0.89375	-0.03552		0.923633	-0.00155
		0.897083	-0.03636		0.926967	-0.00185
		0.900417	-0.03737		0.9303	-0.00203
		0.90375	-0.03862		0.933633	-0.00209
		0.907083	-0.04011		0.936967	-0.00203
		0.910417	-0.04178		0.9403	-0.00185
		0.91375	-0.04363		0.943633	-0.00161
		0.917083	-0.0456		0.946967	-0.00143
		0.920417	-0.04756		0.9503	-0.00131
		0.92375	-0.04953		0.953633	-0.00131
		0.927083	-0.05138		0.956967	-0.00143
		0.930417	-0.05311		0.9603	-0.00173
		0.93375	-0.05472		0.963633	-0.00232
		0.937083	-0.05627		0.966967	-0.00322
		0.940417	-0.05776		0.9703	-0.00435
		0.94375	-0.05925		0.973633	-0.0059
		0.947083	-0.06092		0.976967	-0.00769
		0.950417	-0.06276		0.9803	-0.00983
		0.95375	-0.06491		0.983633	-0.01228
		0.957083	-0.06741		0.986967	-0.01508
		0.960417	-0.0701		0.9903	-0.01812
		0.96375	-0.07302		0.993633	-0.02134
		0.967083	-0.07606		0.996967	-0.02462
		0.970417	-0.07915		1.0003	-0.02795
		0.97375	-0.08231		1.00363	-0.03129
		0.977083	-0.08535		1.00697	-0.03457
		0.980417	-0.08833		1.0103	-0.03779
		0.98375	-0.09114		1.01363	-0.04095
		0.987083	-0.09394		1.01697	-0.04405
		0.990417	-0.09668		1.0203	-0.04721
		0.99375	-0.09954		1.02363	-0.05037
		0.997083	-0.10246		1.02697	-0.05352
		1.00042	-0.10544		1.0303	-0.05668
		1.00375	-0.10854		1.03363	-0.05996
		1.00708	-0.11158		1.03697	-0.0633
		1.01042	-0.1145		1.0403	-0.06676
		1.01375	-0.11718		1.04363	-0.07027
		1.01708	-0.11951		1.04697	-0.07385
		1.02042	-0.1213		1.0503	-0.07743
		1.02375	-0.12255		1.05363	-0.081
		1.02708	-0.12314		1.05697	-0.0844
		1.03042	-0.12326		1.0603	-0.08768
		1.03375	-0.12285		1.06363	-0.09066
		1.03708	-0.12201		1.06697	-0.09328
		1.04042	-0.12094		1.0703	-0.09549
		1.04375	-0.11957		1.07363	-0.09722
		1.04708	-0.11808		1.07697	-0.09853
		1.05042	-0.11647		1.0803	-0.09942
		1.05375	-0.1148		1.08363	-0.10008
		1.05708	-0.11301		1.08697	-0.10043
		1.06042	-0.1111		1.0903	-0.10073
		1.06375	-0.10908		1.09363	-0.10091
		1.06708	-0.10693		1.09697	-0.10115
		1.07042	-0.10478		1.1003	-0.10145
		1.07375	-0.10252		1.10363	-0.10186
		1.07708	-0.10037		1.10697	-0.10234
		1.08042	-0.09829		1.1103	-0.10294
		1.08375	-0.09638		1.11363	-0.10359
		1.08708	-0.09465		1.11697	-0.10437
		1.09042	-0.09316		1.1203	-0.10514
		1.09375	-0.09185		1.12363	-0.10598
		1.09708	-0.09066		1.12697	-0.10687
		1.10042	-0.08953		1.1303	-0.10782
		1.10375	-0.08839		1.13363	-0.10884
		1.10708	-0.08714		1.13697	-0.10991
		1.11042	-0.08565		1.1403	-0.11104
		1.11375	-0.08392		1.14363	-0.11218
		1.11708	-0.08178		1.14697	-0.11313
		1.12042	-0.07927		1.1503	-0.1139
		1.12375	-0.07653		1.15363	-0.11444
		1.12708	-0.07361		1.15697	-0.11456
		1.13042	-0.07057		1.1603	-0.11426
		1.13375	-0.06765		1.16363	-0.11349
		1.13708	-0.06485		1.16697	-0.11218
		1.14042	-0.06241		1.1703	-0.11039
		1.14375	-0.06044		1.17363	-0.10824
		1.14708	-0.05901		1.17697	-0.10574
		1.15042	-0.05811		1.1803	-0.10312
		1.15375	-0.05776		1.18363	-0.10037
		1.15708	-0.05776		1.18697	-0.09757
		1.16042	-0.05805		1.1903	-0.09489
		1.16375	-0.05853		1.19363	-0.09227
		1.16708	-0.05901		1.19697	-0.08965
		1.17042	-0.05931		1.2003	-0.08702
		1.17375	-0.05943		1.20363	-0.0844
		1.17708	-0.05925		1.20697	-0.08166
		1.18042	-0.05889		1.2103	-0.07892
		1.18375	-0.05835		1.21363	-0.07612
		1.18708	-0.05782		1.21697	-0.07337
		1.19042	-0.05728		1.2203	-0.07057
		1.19375	-0.0568		1.22363	-0.06789
		1.19708	-0.05651		1.22697	-0.06527
		1.20042	-0.05639		1.2303	-0.06264
		1.20375	-0.05639		1.23363	-0.05996
		1.20708	-0.05645		1.23697	-0.0571
		1.21042	-0.05656		1.2403	-0.05394
		1.21375	-0.05656		1.24363	-0.05043
		1.21708	-0.05645		1.24697	-0.04649
		1.22042	-0.05621		1.2503	-0.0422
		1.22375	-0.05603		1.25363	-0.03761
		1.22708	-0.05591		1.25697	-0.0329
		1.23042	-0.05597		1.2603	-0.02819
		1.23375	-0.05621		1.26363	-0.02372
		1.23708	-0.05668		1.26697	-0.01955
		1.24042	-0.05734		1.2703	-0.0158
		1.24375	-0.05811		1.27363	-0.01246
		1.24708	-0.05895		1.27697	-0.00954
		1.25042	-0.05966		1.2803	-0.00697
		1.25375	-0.0602		1.28363	-0.00471
		1.25708	-0.06044		1.28697	-0.0025
		1.26042	-0.06038		1.2903	-0.00036
		1.26375	-0.05996		1.29363	0.001669
		1.26708	-0.05937		1.29697	0.003695
		1.27042	-0.05877		1.3003	0.005543
		1.27375	-0.05835		1.30363	0.007272
		1.27708	-0.05823		1.30697	0.008881
		1.28042	-0.05847		1.3103	0.010312
		1.28375	-0.05931		1.31363	0.011623
		1.28708	-0.0608		1.31697	0.012875
		1.29042	-0.06306		1.3203	0.014067
		1.29375	-0.06616		1.32363	0.015199
		1.29708	-0.07004		1.32697	0.016451
		1.30042	-0.07463		1.3303	0.017643
		1.30375	-0.07999		1.33363	0.018775
		1.30708	-0.08607		1.33697	0.01967
		1.31042	-0.09292		1.3403	0.020266
		1.31375	-0.10049		1.34363	0.020504
		1.31708	-0.10872		1.34697	0.020385
		1.32042	-0.11742		1.3503	0.019908
		1.32375	-0.12648		1.35363	0.019252
		1.32708	-0.13566		1.35697	0.018775
		1.33042	-0.14472		1.3603	0.018775
		1.33375	-0.15336		1.36363	0.01967
		1.33708	-0.16117		1.36697	0.021815
		1.34042	-0.16767		1.3703	0.025511
		1.34375	-0.1725		1.37363	0.030994
		1.34708	-0.17524		1.37697	0.038266
		1.35042	-0.17565		1.3803	0.047445
		1.35375	-0.17351		1.38363	0.058174
		1.35708	-0.1688		1.38697	0.070393
		1.36042	-0.16147		1.3903	0.083625
		1.36375	-0.15175		1.39363	0.097632
		1.36708	-0.13977		1.39697	0.112057
		1.37042	-0.12589		1.4003	0.12666
		1.37375	-0.11051		1.40363	0.141263
		1.37708	-0.09388		1.40697	0.155687
		1.38042	-0.07647		1.4103	0.169992
		1.38375	-0.05841		1.41363	0.184119
		1.38708	-0.04005		1.41697	0.197887
		1.39042	-0.02146		1.4203	0.211418
		1.39375	-0.00268		1.42363	0.224531
		1.39708	0.016212		1.42697	0.237226
		1.40042	0.035226		1.4303	0.249445
		1.40375	0.054479		1.43363	0.261009
		1.40708	0.073791		1.43697	0.271916
		1.41042	0.093162		1.4403	0.28193
		1.41375	0.112474		1.44363	0.291169
		1.41708	0.131547		1.44697	0.299513
		1.42042	0.150084		1.4503	0.307024
		1.42375	0.167847		1.45363	0.313878
		1.42708	0.184417		1.45697	0.320017
		1.43042	0.199676		1.4603	0.325561
		1.43375	0.213325		1.46363	0.330627
		1.43708	0.225186		1.46697	0.335157
		1.44042	0.23526		1.4703	0.339329
		1.44375	0.243485		1.47363	0.343204
		1.44708	0.249922		1.47697	0.34672
		1.45042	0.254691		1.4803	0.34982
		1.45375	0.25785		1.48363	0.352621
		1.45708	0.259459		1.48697	0.354946
		1.46042	0.259757		1.4903	0.356853
		1.46375	0.258863		1.49363	0.358343
		1.46708	0.256836		1.49697	0.359476
		1.47042	0.253975		1.5003	0.360131
		1.47375	0.25034		1.50363	0.36031
		1.47708	0.246048		1.50697	0.360131
		1.48042	0.24116		1.5103	0.359535
		1.48375	0.235736		1.51363	0.358701
		1.48708	0.229955		1.51697	0.357747
		1.49042	0.223815		1.5203	0.356674
		1.49375	0.217497		1.52363	0.355661
		1.49708	0.211		1.52697	0.354707
		1.50042	0.204384		1.5303	0.353992
		1.50375	0.197649		1.53363	0.353515
		1.50708	0.191092		1.53697	0.353396
		1.51042	0.184655		1.5403	0.353456
		1.51375	0.178635		1.54363	0.353634
		1.51708	0.173032		1.54697	0.353813
		1.52042	0.168145		1.5503	0.353754
		1.52375	0.163972		1.55363	0.353396
		1.52708	0.160575		1.55697	0.35274
		1.53042	0.158131		1.5603	0.351727
		1.53375	0.156581		1.56363	0.350296
		1.53708	0.155985		1.56697	0.348508
		1.54042	0.156343		1.5703	0.346541
		1.54375	0.157654		1.57363	0.344515
		1.54708	0.1598		1.57697	0.342727
		1.55042	0.16278		1.5803	0.341475
		1.55375	0.166595		1.58363	0.340879
		1.55708	0.171125		1.58697	0.341356
		1.56042	0.176311		1.5903	0.343204
		1.56375	0.182152		1.59363	0.34672
		1.56708	0.18841		1.59697	0.352323
		1.57042	0.195026		1.6003	0.36031
		1.57375	0.201881		1.60363	0.37086
		1.57708	0.208735		1.60697	0.384152
		1.58042	0.215471		1.6103	0.400186
		1.58375	0.221848		1.61363	0.41908
		1.58708	0.227809		1.61697	0.440478
		1.59042	0.233173		1.6203	0.464261
		1.59375	0.237882		1.62363	0.489891
		1.59708	0.241816		1.62697	0.516951
		1.60042	0.244915		1.6303	0.545025
		1.60375	0.247061		1.63363	0.573516
		1.60708	0.248313		1.63697	0.601947
		1.61042	0.248551		1.6403	0.629723
		1.61375	0.247777		1.64363	0.656247
		1.61708	0.245988		1.64697	0.680983
		1.62042	0.243306		1.6503	0.703335
		1.62375	0.23973		1.65363	0.722826
		1.62708	0.235319		1.65697	0.738978
		1.63042	0.230134		1.6603	0.751495
		1.63375	0.224352		1.66363	0.760138
		1.63708	0.218153		1.66697	0.764668
		1.64042	0.211656		1.6703	0.765204
		1.64375	0.20504		1.67363	0.761807
		1.64708	0.198483		1.67697	0.754833
		1.65042	0.192106		1.6803	0.744581
		1.65375	0.185907		1.68363	0.731587
		1.65708	0.179946		1.68697	0.716269
		1.66042	0.174463		1.6903	0.699103
		1.66375	0.169337		1.69363	0.680566
		1.66708	0.164628		1.69697	0.661254
		1.67042	0.160456		1.7003	0.641465
		1.67375	0.15676		1.70363	0.621796
		1.67708	0.153542		1.70697	0.602484
		1.68042	0.150859		1.7103	0.583947
		1.68375	0.148654		1.71363	0.566363
		1.68708	0.146985		1.71697	0.549912
		1.69042	0.145912		1.7203	0.534654
		1.69375	0.145257		1.72363	0.520647
		1.69708	0.145018		1.72697	0.507832
		1.70042	0.145018		1.7303	0.496089
		1.70375	0.145137		1.73363	0.485301
		1.70708	0.145316		1.73697	0.475407
		1.71042	0.145376		1.7403	0.466347
		1.71375	0.145257		1.74363	0.458121
		1.71708	0.14478		1.74697	0.45079
		1.72042	0.143945		1.7503	0.444412
		1.72375	0.142694		1.75363	0.439048
		1.72708	0.141084		1.75697	0.434875
		1.73042	0.139236		1.7603	0.431955
		1.73375	0.137389		1.76363	0.430226
		1.73708	0.135601		1.76697	0.429869
		1.74042	0.134051		1.7703	0.430644
		1.74375	0.132918		1.77363	0.432551
		1.74708	0.132203		1.77697	0.435412
		1.75042	0.132024		1.7803	0.439167
		1.75375	0.132382		1.78363	0.443578
		1.75708	0.133276		1.78697	0.448644
		1.76042	0.134587		1.7903	0.454128
		1.76375	0.136137		1.79363	0.459909
		1.76708	0.137985		1.79697	0.465691
		1.77042	0.139832		1.8003	0.471294
		1.77375	0.14168		1.80363	0.476599
		1.77708	0.14329		1.80697	0.481367
		1.78042	0.14472		1.8103	0.485539
		1.78375	0.145793		1.81363	0.489056
		1.78708	0.146449		1.81697	0.491798
		1.79042	0.146806		1.8203	0.493884
		1.79375	0.146866		1.82363	0.495374
		1.79708	0.146747		1.82697	0.496387
		1.80042	0.146568		1.8303	0.496984
		1.80375	0.146389		1.83363	0.497282
		1.80708	0.146389		1.83697	0.497401
		1.81042	0.146568		1.8403	0.497282
		1.81375	0.146985		1.84363	0.497043
		1.81708	0.147641		1.84697	0.496626
		1.82042	0.148535		1.8503	0.496149
		1.82375	0.149488		1.85363	0.495732
		1.82708	0.150561		1.85697	0.495434
		1.83042	0.151575		1.8603	0.495315
		1.83375	0.152588		1.86363	0.495374
		1.83708	0.153601		1.86697	0.495672
		1.84042	0.154614		1.8703	0.496089
		1.84375	0.155628		1.87363	0.496686
		1.84708	0.156701		1.87697	0.497222
		1.85042	0.157833		1.8803	0.497639
		1.85375	0.159085		1.88363	0.497818
		1.85708	0.160396		1.88697	0.49752
		1.86042	0.161827		1.8903	0.496805
		1.86375	0.163257		1.89363	0.495493
		1.86708	0.164568		1.89697	0.493705
		1.87042	0.165761		1.9003	0.491321
		1.87375	0.166595		1.90363	0.48852
		1.87708	0.167012		1.90697	0.485241
		1.88042	0.166893		1.9103	0.481725
		1.88375	0.166237		1.91363	0.47785
		1.88708	0.164986		1.91697	0.473857
		1.89042	0.163317		1.9203	0.469685
		1.89375	0.16135		1.92363	0.465393
		1.89708	0.159264		1.92697	0.461042
		1.90042	0.157237		1.9303	0.456631
		1.90375	0.155389		1.93363	0.452101
		1.90708	0.15378		1.93697	0.447512
		1.91042	0.152469		1.9403	0.442803
		1.91375	0.151515		1.94363	0.437975
		1.91708	0.150919		1.94697	0.432968
		1.92042	0.150561		1.9503	0.427783
		1.92375	0.150383		1.95363	0.422478
		1.92708	0.150323		1.95697	0.416994
		1.93042	0.150442		1.9603	0.41151
		1.93375	0.150681		1.96363	0.405908
		1.93708	0.151038		1.96697	0.400305
		1.94042	0.151575		1.9703	0.394762
		1.94375	0.152111		1.97363	0.389338
		1.94708	0.152647		1.97697	0.384152
		1.95042	0.153184		1.9803	0.379145
		1.95375	0.153601		1.98363	0.374377
		1.95708	0.153899		1.98697	0.369847
		1.96042	0.154197		1.9903	0.365555
		1.96375	0.154495		1.99363	0.361502
		1.96708	0.154853		1.99697	0.357807
		1.97042	0.15533		2.0003	0.354409
		1.97375	0.156105		2.00363	0.351429
		1.97708	0.157177		2.00697	0.348866
		1.98042	0.158608		2.0103	0.346899
		1.98375	0.160396		2.01363	0.345588
		1.98708	0.162661		2.01697	0.34517
		1.99042	0.165343		2.0203	0.345707
		1.99375	0.168383		2.02363	0.347257
		1.99708	0.1719		2.02697	0.34976
		2.00042	0.175953		2.0303	0.353217
		2.00375	0.180602		2.03363	0.357509
		2.00708	0.185907		2.03697	0.362635
		2.01042	0.191987		2.0403	0.368357
		2.01375	0.198722		2.04363	0.374556
		2.01708	0.206172		2.04697	0.381112
		2.02042	0.214219		2.0503	0.387847
		2.02375	0.222802		2.05363	0.394762
		2.02708	0.231743		2.05697	0.401914
		2.03042	0.240803		2.0603	0.409245
		2.03375	0.249863		2.06363	0.416815
		2.03708	0.258684		2.06697	0.424504
		2.04042	0.267148		2.0703	0.432193
		2.04375	0.275254		2.07363	0.439823
		2.04708	0.282824		2.07697	0.447214
		2.05042	0.289857		2.0803	0.454128
		2.05375	0.296354		2.08363	0.460446
		2.05708	0.302255		2.08697	0.46593
		2.06042	0.307679		2.0903	0.4704
		2.06375	0.312686		2.09363	0.473797
		2.06708	0.317335		2.09697	0.476122
		2.07042	0.321627		2.1003	0.477433
		2.07375	0.325561		2.10363	0.47785
		2.07708	0.329316		2.10697	0.477612
		2.08042	0.332773		2.1103	0.476837
		2.08375	0.336111		2.11363	0.475585
		2.08708	0.33915		2.11697	0.474095
		2.09042	0.342011		2.1203	0.472367
		2.09375	0.344455		2.12363	0.470579
		2.09708	0.346601		2.12697	0.468731
		2.10042	0.348389		2.1303	0.466824
		2.10375	0.349879		2.13363	0.464916
		2.10708	0.351012		2.13697	0.462949
		2.11042	0.351965		2.1403	0.460982
		2.11375	0.35274		2.14363	0.458956
		2.11708	0.353396		2.14697	0.45675
		2.12042	0.353932		2.1503	0.454307
		2.12375	0.354469		2.15363	0.451565
		2.12708	0.354886		2.15697	0.448465
		2.13042	0.355184		2.1603	0.445127
		2.13375	0.355303		2.16363	0.441551
		2.13708	0.355184		2.16697	0.437856
		2.14042	0.354826		2.1703	0.43416
		2.14375	0.35423		2.17363	0.430524
		2.14708	0.353396		2.17697	0.427067
		2.15042	0.352263		2.1803	0.423968
		2.15375	0.351012		2.18363	0.421286
		2.15708	0.349522		2.18697	0.418842
		2.16042	0.347912		2.1903	0.416636
		2.16375	0.346184		2.19363	0.41461
		2.16708	0.344336		2.19697	0.412643
		2.17042	0.342429		2.2003	0.410557
		2.17375	0.340343		2.20363	0.408351
		2.17708	0.338256		2.20697	0.405967
		2.18042	0.336111		2.2103	0.403345
		2.18375	0.333965		2.21363	0.400484
		2.18708	0.331998		2.21697	0.397384
		2.19042	0.33015		2.2203	0.393987
		2.19375	0.328481		2.22363	0.390291
		2.19708	0.326931		2.22697	0.386417
		2.20042	0.325501		2.2303	0.382304
		2.20375	0.32419		2.23363	0.378132
		2.20708	0.322998		2.23697	0.3739
		2.21042	0.321925		2.2403	0.369728
		2.21375	0.320911		2.24363	0.365734
		2.21708	0.319958		2.24697	0.361979
		2.22042	0.318944		2.2503	0.358462
		2.22375	0.317991		2.25363	0.355184
		2.22708	0.316978		2.25697	0.352204
		2.23042	0.315905		2.2603	0.349402
		2.23375	0.314653		2.26363	0.34672
		2.23708	0.313222		2.26697	0.344276
		2.24042	0.311613		2.2703	0.341952
		2.24375	0.309825		2.27363	0.339746
		2.24708	0.307858		2.27697	0.33778
		2.25042	0.305831		2.2803	0.336051
		2.25375	0.303805		2.28363	0.334561
		2.25708	0.301898		2.28697	0.333369
		2.26042	0.300229		2.2903	0.332415
		2.26375	0.298738		2.29363	0.3317
		2.26708	0.297606		2.29697	0.331044
		2.27042	0.296772		2.3003	0.330448
		2.27375	0.296235		2.30363	0.329673
		2.27708	0.296056		2.30697	0.328779
		2.28042	0.296056		2.3103	0.327647
		2.28375	0.296235		2.31363	0.326276
		2.28708	0.296533		2.31697	0.324726
		2.29042	0.296831		2.3203	0.322938
		2.29375	0.297129		2.32363	0.321031
		2.29708	0.297368		2.32697	0.319064
		2.30042	0.297546		2.3303	0.317037
		2.30375	0.297546		2.33363	0.31507
		2.30708	0.297308		2.33697	0.313222
		2.31042	0.296772		2.3403	0.311553
		2.31375	0.296056		2.34363	0.310004
		2.31708	0.295222		2.34697	0.308752
		2.32042	0.294387		2.3503	0.307739
		2.32375	0.293493		2.35363	0.306904
		2.32708	0.292718		2.35697	0.306368
		2.33042	0.292063		2.3603	0.306129
		2.33375	0.291646		2.36363	0.30607
		2.33708	0.291467		2.36697	0.306129
		2.34042	0.291586		2.3703	0.306249
		2.34375	0.291944		2.37363	0.306368
		2.34708	0.29242		2.37697	0.306308
		2.35042	0.293016		2.3803	0.306129
		2.35375	0.293493		2.38363	0.305772
		2.35708	0.293851		2.38697	0.305295
		2.36042	0.29397		2.3903	0.304639
		2.36375	0.293851		2.39363	0.303864
		2.36708	0.293553		2.39697	0.30303
		2.37042	0.293076		2.4003	0.302196
		2.37375	0.29254		2.40363	0.301301
		2.37708	0.292122		2.40697	0.300586
		2.38042	0.291824		2.4103	0.299871
		2.38375	0.291944		2.41363	0.299275
		2.38708	0.29248		2.41697	0.298679
		2.39042	0.293493		2.4203	0.298023
		2.39375	0.294805		2.42363	0.297308
		2.39708	0.296474		2.42697	0.296354
		2.40042	0.298262		2.4303	0.295222
		2.40375	0.29999		2.43363	0.293791
		2.40708	0.30154		2.43697	0.292063
		2.41042	0.302613		2.4403	0.289917
		2.41375	0.303209		2.44363	0.287592
		2.41708	0.303209		2.44697	0.28497
		2.42042	0.302553		2.4503	0.282347
		2.42375	0.301301		2.45363	0.279725
		2.42708	0.299335		2.45697	0.277281
		2.43042	0.296712		2.4603	0.275135
		2.43375	0.293493		2.46363	0.273287
		2.43708	0.289798		2.46697	0.271916
		2.44042	0.285625		2.4703	0.271082
		2.44375	0.281036		2.47363	0.270784
		2.44708	0.276268		2.47697	0.271142
		2.45042	0.27132		2.4803	0.272036
		2.45375	0.266433		2.48363	0.273407
		2.45708	0.261784		2.48697	0.275195
		2.46042	0.257552		2.4903	0.277281
		2.46375	0.253916		2.49363	0.279486
		2.46708	0.250936		2.49697	0.281692
		2.47042	0.24873		2.5003	0.283778
		2.47375	0.2473		2.50363	0.285566
		2.47708	0.246584		2.50697	0.286996
		2.48042	0.246525		2.5103	0.287831
		2.48375	0.247061		2.51363	0.288188
		2.48708	0.248015		2.51697	0.28795
		2.49042	0.249326		2.5203	0.287116
		2.49375	0.250876		2.52363	0.285804
		2.49708	0.252664		2.52697	0.284016
		2.50042	0.254631		2.5303	0.28187
		2.50375	0.256896		2.53363	0.279486
		2.50708	0.259459		2.53697	0.276983
		2.51042	0.262558		2.5403	0.274539
		2.51375	0.266373		2.54363	0.272334
		2.51708	0.271201		2.54697	0.270545
		2.52042	0.27734		2.5503	0.269175
		2.52375	0.285089		2.55363	0.268459
		2.52708	0.294864		2.55697	0.268459
		2.53042	0.306904		2.5603	0.269234
		2.53375	0.321686		2.56363	0.270903
		2.53708	0.339448		2.56697	0.273466
		2.54042	0.360608		2.5703	0.277042
		2.54375	0.385344		2.57363	0.281692
		2.54708	0.413954		2.57697	0.287592
		2.55042	0.446558		2.5803	0.294983
		2.55375	0.483274		2.58363	0.304043
		2.55708	0.524104		2.58697	0.315189
		2.56042	0.568926		2.5903	0.328779
		2.56375	0.617564		2.59363	0.345528
		2.56708	0.669658		2.59697	0.366151
		2.57042	0.724614		2.6003	0.391603
		2.57375	0.781715		2.60363	0.422955
		2.57708	0.840008		2.60697	0.461161
		2.58042	0.89854		2.6103	0.507176
		2.58375	0.955939		2.61363	0.561357
		2.58708	1.01083		2.61697	0.623703
		2.59042	1.06186		2.6203	0.693381
		2.59375	1.10757		2.62363	0.769019
		2.59708	1.14679		2.62697	0.848353
		2.60042	1.1785		2.6303	0.928521
		2.60375	1.20211		2.63363	1.00625
		2.60708	1.21725		2.63697	1.07819
		2.61042	1.22398		2.6403	1.14107
		2.61375	1.22267		2.64363	1.19239
		2.61708	1.21409		2.64697	1.23012
		2.62042	1.19924		2.6503	1.25337
		2.62375	1.1794		2.65363	1.26195
		2.62708	1.15567		2.65697	1.25665
		2.63042	1.12933		2.6603	1.23876
		2.63375	1.10155		2.66363	1.21027
		2.63708	1.07342		2.66697	1.17332
		2.64042	1.04576		2.6703	1.13028
		2.64375	1.01924		2.67363	1.08326
		2.64708	0.994503		2.67697	1.03426
		2.65042	0.971675		2.6803	0.984907
		2.65375	0.950873		2.68363	0.936508
		2.65708	0.932157		2.68697	0.890195
		2.66042	0.915229		2.6903	0.846505
		2.66375	0.90009		2.69363	0.805974
		2.66708	0.8865		2.69697	0.768781
		2.67042	0.874579		2.7003	0.734985
		2.67375	0.864863		2.70363	0.704408
		2.67708	0.858426		2.70697	0.67699
		2.68042	0.856876		2.7103	0.652552
		2.68375	0.862598		2.71363	0.630975
		2.68708	0.878334		2.71697	0.612259
		2.69042	0.907123		2.7203	0.596344
		2.69375	0.951707		2.72363	0.583351
		2.69708	1.01417		2.72697	0.573456
		2.70042	1.09553		2.7303	0.566781
		2.70375	1.19513		2.73363	0.563741
		2.70708	1.31053		2.73697	0.564575
		2.71042	1.43737		2.7403	0.569761
		2.71375	1.56963		2.74363	0.579715
		2.71708	1.70004		2.74697	0.595033
		2.72042	1.82098		2.7503	0.616252
		2.72375	1.92511		2.75363	0.643611
		2.72708	2.00605		2.75697	0.677466
		2.73042	2.05922		2.7603	0.717461
		2.73375	2.08205		2.76363	0.763118
		2.73708	2.07418		2.76697	0.813246
		2.74042	2.03753		2.7703	0.866294
		2.74375	1.97554		2.77363	0.920177
		2.74708	1.89304		2.77697	0.97245
		2.75042	1.79565		2.7803	1.02067
		2.75375	1.6889		2.78363	1.06245
		2.75708	1.57809		2.78697	1.09565
		2.76042	1.468		2.7903	1.1189
		2.76375	1.3625		2.79363	1.1313
		2.76708	1.26463		2.79697	1.13279
		2.77042	1.17677		2.8003	1.12397
		2.77375	1.10042		2.80363	1.10626
		2.77708	1.03664		2.80697	1.08141
		2.78042	0.98592		2.8103	1.05154
		2.78375	0.94825		2.81363	1.01906
		2.78708	0.923038		2.81697	0.986099
		2.79042	0.909269		2.8203	0.954866
		2.79375	0.905454		2.82363	0.92721
		2.79708	0.909507		2.82697	0.9045
		2.80042	0.919163		2.8303	0.887692
		2.80375	0.93168		2.83363	0.87744
		2.80708	0.944495		2.83697	0.873744
		2.81042	0.955164		2.8403	0.876427
		2.81375	0.961661		2.84363	0.884891
		2.81708	0.962317		2.84697	0.898123
		2.82042	0.956237		2.8503	0.91511
		2.82375	0.943184		2.85363	0.934899
		2.82708	0.923574		2.85697	0.956416
		2.83042	0.898302		2.8603	0.978768
		2.83375	0.868797		2.86363	1.0013
		2.83708	0.836551		2.86697	1.02341
		2.84042	0.803173		2.8703	1.04445
		2.84375	0.770152		2.87363	1.06406
		2.84708	0.738859		2.87697	1.08177
		2.85042	0.710249		2.8803	1.09702
		2.85375	0.685036		2.88363	1.10924
		2.85708	0.663638		2.88697	1.11771
		2.86042	0.646174		2.8903	1.12194
		2.86375	0.632644		2.89363	1.12146
		2.86708	0.622809		2.89697	1.11598
		2.87042	0.616372		2.9003	1.10567
		2.87375	0.613093		2.90363	1.09094
		2.87708	0.612497		2.90697	1.07259
		2.88042	0.614405		2.9103	1.0516
		2.88375	0.618398		2.91363	1.02919
		2.88708	0.624418		2.91697	1.00654
		2.89042	0.632346		2.9203	0.984907
		2.89375	0.642061		2.92363	0.965118
		2.89708	0.653625		2.92697	0.947833
		2.90042	0.667095		2.9303	0.933468
		2.90375	0.682652		2.93363	0.922024
		2.90708	0.700414		2.93697	0.91362
		2.91042	0.720739		2.9403	0.908494
		2.91375	0.743747		2.94363	0.907302
		2.91708	0.769556		2.94697	0.911415
		2.92042	0.798285		2.9503	0.923276
		2.92375	0.829816		2.95363	0.945985
		2.92708	0.864148		2.95697	0.983536
		2.93042	0.901103		2.9603	1.03998
		2.93375	0.940621		2.96363	1.11914
		2.93708	0.982523		2.96697	1.22356
		2.94042	1.02663		2.9703	1.35428
		2.94375	1.07306		2.97363	1.50955
		2.94708	1.12176		2.97697	1.68514
		2.95042	1.17302		2.9803	1.87379
		2.95375	1.22696		2.98363	2.0659
		2.95708	1.28371		2.98697	2.25049
		2.96042	1.34337		2.9903	2.41607
		2.96375	1.40578		2.99363	2.55179
		2.96708	1.47057		2.99697	2.64889
		2.97042	1.53714		3.0003	2.70134
		2.97375	1.6045		3.00363	2.70647
		2.97708	1.67125		3.00697	2.66504
		2.98042	1.73593		3.0103	2.58094
		2.98375	1.79654		3.01363	2.46084
		2.98708	1.85102		3.01697	2.31302
		2.99042	1.89728		3.0203	2.14666
		2.99375	1.93298		3.02363	1.97077
		2.99708	1.9561		3.02697	1.7935
		3.00042	1.96487		3.0303	1.62184
		3.00375	1.95795		3.03363	1.46115
		3.00708	1.93459		3.03697	1.31506
		3.01042	1.89471		3.0403	1.18572
		3.01375	1.83892		3.04363	1.0739
		3.01708	1.76871		3.04697	0.979245
		3.02042	1.68633		3.0503	0.900745
		3.02375	1.59466		3.05363	0.836611
		3.02708	1.49691		3.05697	0.784993
		3.03042	1.39648		3.0603	0.743747
		3.03375	1.29664		3.06363	0.710845
		3.03708	1.20044		3.06697	0.68444
		3.04042	1.11037		3.0703	0.662804
		3.04375	1.0283		3.07363	0.644565
		3.04708	0.955462		3.07697	0.628531
		3.05042	0.89252		3.0803	0.613928
		3.05375	0.839472		3.08363	0.6001
		3.05708	0.795722		3.08697	0.586629
		3.06042	0.760436		3.0903	0.573218
		3.06375	0.732601		3.09363	0.559747
		3.06708	0.710964		3.09697	0.546157
		3.07042	0.694275		3.1003	0.532329
		3.07375	0.681281		3.10363	0.518441
		3.07708	0.67085		3.10697	0.504494
		3.08042	0.66191		3.1103	0.490606
		3.08375	0.653565		3.11363	0.476837
		3.08708	0.645041		3.11697	0.463247
		3.09042	0.635862		3.1203	0.449955
		3.09375	0.62561		3.12363	0.437081
		3.09708	0.614166		3.12697	0.424623
		3.10042	0.601351		3.1303	0.412703
		3.10375	0.587344		3.13363	0.401378
		3.10708	0.572264		3.13697	0.390649
		3.11042	0.55635		3.1403	0.380576
		3.11375	0.539958		3.14363	0.371277
		3.11708	0.523329		3.14697	0.362754
		3.12042	0.506759		3.1503	0.355065
		3.12375	0.490487		3.15363	0.348151
		3.12708	0.474632		3.15697	0.342131
		3.13042	0.459254		3.1603	0.336826
		3.13375	0.444531		3.16363	0.332177
		3.13708	0.430346		3.16697	0.328004
		3.14042	0.416815		3.1703	0.324309
		3.14375	0.403881		3.17363	0.320971
		3.14708	0.391603		3.17697	0.317872
		3.15042	0.37992		3.1803	0.315011
		3.15375	0.369012		3.18363	0.312388
		3.15708	0.358999		3.18697	0.310004
		3.16042	0.350177		3.1903	0.307977
		3.16375	0.342727		3.19363	0.306249
		3.16708	0.337064		3.19697	0.304937
		3.17042	0.333488		3.2003	0.303984
		3.17375	0.332534		3.20363	0.303268
		3.17708	0.33468		3.20697	0.302792
		3.18042	0.340283		3.2103	0.302374
		3.18375	0.34982		3.21363	0.302076
		3.18708	0.363708		3.21697	0.301838
		3.19042	0.382006		3.2203	0.301659
		3.19375	0.404716		3.22363	0.3016
		3.19708	0.431538		3.22697	0.301778
		3.20042	0.461936		3.2303	0.302374
		3.20375	0.495136		3.23363	0.303388
		3.20708	0.530183		3.23697	0.304937
		3.21042	0.565886		3.2403	0.307083
		3.21375	0.601172		3.24363	0.309765
		3.21708	0.63473		3.24697	0.312924
		3.22042	0.665367		3.2503	0.316322
		3.22375	0.692129		3.25363	0.319779
		3.22708	0.714183		3.25697	0.323117
		3.23042	0.730813		3.2603	0.326157
		3.23375	0.74172		3.26363	0.328839
		3.23708	0.746667		3.26697	0.331044
		3.24042	0.745714		3.2703	0.332773
		3.24375	0.739217		3.27363	0.333965
		3.24708	0.727594		3.27697	0.33468
		3.25042	0.711501		3.2803	0.335038
		3.25375	0.691772		3.28363	0.335038
		3.25708	0.669122		3.28697	0.334918
		3.26042	0.644445		3.2903	0.33474
		3.26375	0.618517		3.29363	0.334501
		3.26708	0.592172		3.29697	0.334263
		3.27042	0.565946		3.3003	0.334144
		3.27375	0.540376		3.30363	0.334144
		3.27708	0.515878		3.30697	0.334442
		3.28042	0.492752		3.3103	0.334918
		3.28375	0.471115		3.31363	0.335693
		3.28708	0.451028		3.31697	0.336647
		3.29042	0.43267		3.3203	0.33772
		3.29375	0.415921		3.32363	0.338852
		3.29708	0.400841		3.32697	0.339925
		3.30042	0.38743		3.3303	0.34076
		3.30375	0.375807		3.33363	0.341296
		3.30708	0.366092		3.33697	0.341296
		3.31042	0.358462		3.3403	0.340641
		3.31375	0.353158		3.34363	0.33915
		3.31708	0.350416		3.34697	0.336945
		3.32042	0.350595		3.3503	0.333965
		3.32375	0.353813		3.35363	0.330329
		3.32708	0.360429		3.35697	0.326157
		3.33042	0.370443		3.3603	0.321567
		3.33375	0.383854		3.36363	0.316739
		3.33708	0.400603		3.36697	0.311852
		3.34042	0.420332		3.3703	0.307024
		3.34375	0.442743		3.37363	0.302494
		3.34708	0.4673		3.37697	0.298321
		3.35042	0.493407		3.3803	0.294447
		3.35375	0.520408		3.38363	0.29099
		3.35708	0.547707		3.38697	0.28801
		3.36042	0.574648		3.3903	0.285566
		3.36375	0.600576		3.39363	0.283659
		3.36708	0.625074		3.39697	0.282466
		3.37042	0.647545		3.4003	0.28199
		3.37375	0.667632		3.40363	0.282288
		3.37708	0.684917		3.40697	0.283539
		3.38042	0.699162		3.4103	0.285745
		3.38375	0.71013		3.41363	0.289083
		3.38708	0.7177		3.41697	0.293612
		3.39042	0.721812		3.4203	0.299335
		3.39375	0.722468		3.42363	0.306249
		3.39708	0.719666		3.42697	0.314415
		3.40042	0.713766		3.4303	0.323772
		3.40375	0.704944		3.43363	0.334442
		3.40708	0.69356		3.43697	0.346184
		3.41042	0.680089		3.4403	0.359118
		3.41375	0.66483		3.44363	0.373006
		3.41708	0.64826		3.44697	0.387788
		3.42042	0.630677		3.4503	0.403225
		3.42375	0.612497		3.45363	0.419199
		3.42708	0.593901		3.45697	0.43565
		3.43042	0.575244		3.4603	0.452399
		3.43375	0.556648		3.46363	0.469446
		3.43708	0.538349		3.46697	0.486791
		3.44042	0.520468		3.4703	0.504494
		3.44375	0.503242		3.47363	0.522614
		3.44708	0.486851		3.47697	0.54121
		3.45042	0.471354		3.4803	0.560403
		3.45375	0.456929		3.48363	0.580192
		3.45708	0.443637		3.48697	0.600576
		3.46042	0.431538		3.4903	0.621557
		3.46375	0.42057		3.49363	0.642955
		3.46708	0.410616		3.49697	0.664711
		3.47042	0.401735		3.5003	0.686705
		3.47375	0.393748		3.50363	0.708938
		3.47708	0.386655		3.50697	0.731289
		3.48042	0.380337		3.5103	0.75376
		3.48375	0.374794		3.51363	0.776291
		3.48708	0.369906		3.51697	0.798643
		3.49042	0.365615		3.5203	0.820756
		3.49375	0.361919		3.52363	0.842273
		3.49708	0.358701		3.52697	0.862956
		3.50042	0.35584		3.5303	0.882626
		3.50375	0.353277		3.53363	0.900984
		3.50708	0.350773		3.53697	0.917792
		3.51042	0.34827		3.5403	0.932932
		3.51375	0.345647		3.54363	0.946224
		3.51708	0.342786		3.54697	0.957727
		3.52042	0.339568		3.5503	0.967324
		3.52375	0.335932		3.55363	0.975072
		3.52708	0.331879		3.55697	0.981033
		3.53042	0.327229		3.5603	0.985146
		3.53375	0.322163		3.56363	0.987351
		3.53708	0.31662		3.56697	0.987768
		3.54042	0.310719		3.5703	0.986338
		3.54375	0.304461		3.57363	0.983238
		3.54708	0.297964		3.57697	0.978589
		3.55042	0.291348		3.5803	0.972569
		3.55375	0.284731		3.58363	0.965416
		3.55708	0.278354		3.58697	0.957251
		3.56042	0.272274		3.5903	0.94837
		3.56375	0.266612		3.59363	0.938952
		3.56708	0.261366		3.59697	0.929058
		3.57042	0.256717		3.6003	0.918865
		3.57375	0.252604		3.60363	0.908434
		3.57708	0.249088		3.60697	0.897825
		3.58042	0.246048		3.6103	0.887096
		3.58375	0.243485		3.61363	0.876307
		3.58708	0.24128		3.61697	0.865579
		3.59042	0.239372		3.6203	0.855029
		3.59375	0.237703		3.62363	0.844777
		3.59708	0.236273		3.62697	0.834942
		3.60042	0.235021		3.6303	0.825465
		3.60375	0.233829		3.63363	0.816524
		3.60708	0.232637		3.63697	0.808001
		3.61042	0.231326		3.6403	0.799954
		3.61375	0.229836		3.64363	0.792384
		3.61708	0.228047		3.64697	0.785232
		3.62042	0.225961		3.6503	0.778496
		3.62375	0.223517		3.65363	0.772178
		3.62708	0.220716		3.65697	0.766277
		3.63042	0.217676		3.6603	0.760794
		3.63375	0.214517		3.66363	0.755787
		3.63708	0.211418		3.66697	0.751317
		3.64042	0.208437		3.6703	0.747323
		3.64375	0.205755		3.67363	0.743806
		3.64708	0.203431		3.67697	0.740707
		3.65042	0.201464		3.6803	0.738144
		3.65375	0.199914		3.68363	0.735939
		3.65708	0.198662		3.68697	0.73415
		3.66042	0.19753		3.6903	0.73272
		3.66375	0.196457		3.69363	0.731647
		3.66708	0.195205		3.69697	0.730753
		3.67042	0.193834		3.7003	0.730038
		3.67375	0.192225		3.70363	0.729263
		3.67708	0.190437		3.70697	0.72825
		3.68042	0.188529		3.7103	0.726938
		3.68375	0.186622		3.71363	0.72515
		3.68708	0.184834		3.71697	0.722826
		3.69042	0.183284		3.7203	0.719845
		3.69375	0.182152		3.72363	0.71615
		3.69708	0.181437		3.72697	0.711858
		3.70042	0.181198		3.7303	0.706911
		3.70375	0.181317		3.73363	0.701487
		3.70708	0.181735		3.73697	0.695586
		3.71042	0.182152		3.7403	0.689268
		3.71375	0.18245		3.74363	0.682592
		3.71708	0.18239		3.74697	0.675619
		3.72042	0.181973		3.7503	0.668287
		3.72375	0.181079		3.75363	0.660658
		3.72708	0.179768		3.75697	0.652909
		3.73042	0.178158		3.7603	0.645041
		3.73375	0.17637		3.76363	0.637174
		3.73708	0.174701		3.76697	0.629365
		3.74042	0.173211		3.7703	0.621796
		3.74375	0.172019		3.77363	0.614524
		3.74708	0.171304		3.77697	0.60761
		3.75042	0.170946		3.7803	0.601172
		3.75375	0.170946		3.78363	0.595093
		3.75708	0.171244		3.78697	0.589371
		3.76042	0.171661		3.7903	0.584006
		3.76375	0.172257		3.79363	0.57894
		3.76708	0.172794		3.79697	0.574231
		3.77042	0.173271		3.8003	0.569761
		3.77375	0.173628		3.80363	0.565708
		3.77708	0.173867		3.80697	0.561953
		3.78042	0.173926		3.8103	0.558615
		3.78375	0.173748		3.81363	0.555694
		3.78708	0.17345		3.81697	0.553191
		3.79042	0.173032		3.8203	0.551045
		3.79375	0.172555		3.82363	0.549197
		3.79708	0.172138		3.82697	0.547469
		3.80042	0.17184		3.8303	0.5458
		3.80375	0.171721		3.83363	0.544071
		3.80708	0.17184		3.83697	0.542343
		3.81042	0.172138		3.8403	0.540614
		3.81375	0.172615		3.84363	0.538886
		3.81708	0.173151		3.84697	0.537276
		3.82042	0.173748		3.8503	0.535786
		3.82375	0.174224		3.85363	0.534415
		3.82708	0.174403		3.85697	0.533223
		3.83042	0.174344		3.8603	0.53221
		3.83375	0.173986		3.86363	0.531316
		3.83708	0.173509		3.86697	0.530422
		3.84042	0.172973		3.8703	0.529587
		3.84375	0.172615		3.87363	0.528693
		3.84708	0.172496		3.87697	0.527918
		3.85042	0.172734		3.8803	0.527203
		3.85375	0.17339		3.88363	0.526726
		3.85708	0.174463		3.88697	0.526428
		3.86042	0.175893		3.8903	0.526369
		3.86375	0.177562		3.89363	0.526607
		3.86708	0.17935		3.89697	0.527084
		3.87042	0.181079		3.9003	0.52774
		3.87375	0.182569		3.90363	0.528395
		3.87708	0.183821		3.90697	0.529051
		3.88042	0.184655		3.9103	0.529587
		3.88375	0.185192		3.91363	0.529885
		3.88708	0.18537		3.91697	0.529945
		3.89042	0.185251		3.9203	0.529885
		3.89375	0.185013		3.92363	0.529647
		3.89708	0.184596		3.92697	0.529289
		3.90042	0.184059		3.9303	0.529051
		3.90375	0.183582		3.93363	0.528932
		3.90708	0.183046		3.93697	0.52911
		3.91042	0.182688		3.9403	0.529706
		3.91375	0.182331		3.94363	0.530899
		3.91708	0.182152		3.94697	0.532627
		3.92042	0.181913		3.9503	0.534892
		3.92375	0.181675		3.95363	0.537694
		3.92708	0.181377		3.95697	0.540912
		3.93042	0.181019		3.9603	0.544429
		3.93375	0.180542		3.96363	0.548124
		3.93708	0.179946		3.96697	0.551939
		3.94042	0.179291		3.9703	0.555634
		3.94375	0.178635		3.97363	0.559211
		3.94708	0.17792		3.97697	0.562608
		3.95042	0.177205		3.9803	0.565827
		3.95375	0.176609		3.98363	0.568926
		3.95708	0.176132		3.98697	0.572026
		3.96042	0.175893		3.9903	0.575066
		3.96375	0.175774		3.99363	0.578225
		3.96708	0.175834		3.99697	0.581503
		3.97042	0.176072		4.0003	0.58502
		3.97375	0.17637		4.00363	0.588715
		3.97708	0.176787		4.00697	0.592649
		3.98042	0.177324		4.0103	0.596821
		3.98375	0.177979		4.01363	0.601172
		3.98708	0.178576		4.01697	0.605762
		3.99042	0.179172		4.0203	0.61059
		3.99375	0.179589		4.02363	0.615597
		3.99708	0.179946		4.02697	0.620842
		4.00042	0.180125		4.0303	0.626326
		4.00375	0.180185		4.03363	0.632107
		4.00708	0.180006		4.03697	0.638187
		4.01042	0.179589		4.0403	0.644624
		4.01375	0.178993		4.04363	0.651598
		4.01708	0.178277		4.04697	0.658929
		4.02042	0.177503		4.0503	0.666738
		4.02375	0.176668		4.05363	0.674844
		4.02708	0.175714		4.05697	0.683367
		4.03042	0.174761		4.0603	0.692129
		4.03375	0.173688		4.06363	0.70107
		4.03708	0.172615		4.06697	0.71013
		4.04042	0.171423		4.0703	0.71919
		4.04375	0.170231		4.07363	0.72819
		4.04708	0.16886		4.07697	0.737071
		4.05042	0.16737		4.0803	0.746012
		4.05375	0.16588		4.08363	0.755191
		4.05708	0.164509		4.08697	0.764728
		4.06042	0.163317		4.0903	0.774801
		4.06375	0.162363		4.09363	0.785768
		4.06708	0.161707		4.09697	0.797808
		4.07042	0.16129		4.1003	0.8111
		4.07375	0.161111		4.10363	0.825822
		4.07708	0.161111		4.10697	0.842154
		4.08042	0.161171		4.1103	0.860155
		4.08375	0.161111		4.11363	0.879824
		4.08708	0.160873		4.11697	0.901043
		4.09042	0.160277		4.1203	0.923753
		4.09375	0.159383		4.12363	0.947893
		4.09708	0.158072		4.12697	0.973344
		4.10042	0.156522		4.1303	0.999928
		4.10375	0.154674		4.13363	1.0277
		4.10708	0.152707		4.13697	1.05637
		4.11042	0.150621		4.1403	1.08594
		4.11375	0.148416		4.14363	1.1164
		4.11708	0.14627		4.14697	1.14769
		4.12042	0.144124		4.1503	1.17993
		4.12375	0.142097		4.15363	1.21319
		4.12708	0.14019		4.15697	1.24747
		4.13042	0.138402		4.1603	1.28299
		4.13375	0.136733		4.16363	1.31983
		4.13708	0.135303		4.16697	1.35803
		4.14042	0.133991		4.1703	1.39767
		4.14375	0.132918		4.17363	1.43856
		4.14708	0.131905		4.17697	1.4807
		4.15042	0.131011		4.1803	1.52397
		4.15375	0.130057		4.18363	1.5682
		4.15708	0.129104		4.18697	1.61326
		4.16042	0.128031		4.1903	1.65904
		4.16375	0.126958		4.19363	1.70541
		4.16708	0.125885		4.19697	1.75244
		4.17042	0.124753		4.2003	1.80012
		4.17375	0.123739		4.20363	1.84864
		4.17708	0.122845		4.20697	1.89793
		4.18042	0.122011		4.2103	1.94812
		4.18375	0.121415		4.21363	1.99914
		4.18708	0.120997		4.21697	2.05105
		4.19042	0.120759		4.2203	2.10369
		4.19375	0.120819		4.22363	2.15709
		4.19708	0.121057		4.22697	2.21115
		4.20042	0.121534		4.2303	2.26563
		4.20375	0.12219		4.23363	2.32059
		4.20708	0.123024		4.23697	2.37578
		4.21042	0.123858		4.2403	2.43115
		4.21375	0.124753		4.24363	2.48659
		4.21708	0.125587		4.24697	2.54196
		4.22042	0.126302		4.2503	2.59703
		4.22375	0.126898		4.25363	2.65181
		4.22708	0.127375		4.25697	2.70593
		4.23042	0.127554		4.2603	2.75928
		4.23375	0.127494		4.26363	2.81173
		4.23708	0.127196		4.26697	2.86311
		4.24042	0.12666		4.2703	2.91336
		4.24375	0.125945		4.27363	2.96229
		4.24708	0.12511		4.27697	3.00991
		4.25042	0.124097		4.2803	3.05623
		4.25375	0.122964		4.28363	3.10123
		4.25708	0.121653		4.28697	3.14498
		4.26042	0.120223		4.2903	3.18748
		4.26375	0.118792		4.29363	3.22878
		4.26708	0.117481		4.29697	3.26878
		4.27042	0.116289		4.3003	3.3074
		4.27375	0.115275		4.30363	3.34448
		4.27708	0.114381		4.30697	3.38006
		4.28042	0.113606		4.3103	3.41386
		4.28375	0.112951		4.31363	3.44575
		4.28708	0.112414		4.31697	3.47561
		4.29042	0.111938		4.3203	3.50326
		4.29375	0.111461		4.32363	3.5286
		4.29708	0.110984		4.32697	3.5516
		4.30042	0.110388		4.3303	3.57217
		4.30375	0.109613		4.33363	3.59017
		4.30708	0.108778		4.33697	3.60555
		4.31042	0.107944		4.3403	3.61818
		4.31375	0.107229		4.34363	3.62796
		4.31708	0.106573		4.34697	3.63487
		4.32042	0.106156		4.3503	3.63886
		4.32375	0.105798		4.35363	3.64
		4.32708	0.105679		4.35697	3.63821
		4.33042	0.105679		4.3603	3.63362
		4.33375	0.105798		4.36363	3.62641
		4.33708	0.105858		4.36697	3.61669
		4.34042	0.105798		4.3703	3.60471
		4.34375	0.105619		4.37363	3.59058
		4.34708	0.105262		4.37697	3.57455
		4.35042	0.104725		4.3803	3.55685
		4.35375	0.10407		4.38363	3.5376
		4.35708	0.103295		4.38697	3.51703
		4.36042	0.10258		4.3903	3.49534
		4.36375	0.101924		4.39363	3.47275
		4.36708	0.101328		4.39697	3.44938
		4.37042	0.100851		4.4003	3.42554
		4.37375	0.100434		4.40363	3.4014
		4.37708	0.099957		4.40697	3.3772
		4.38042	0.099361		4.4103	3.35306
		4.38375	0.098526		4.41363	3.32922
		4.38708	0.097454		4.41697	3.30567
		4.39042	0.096083		4.4203	3.28267
		4.39375	0.094473		4.42363	3.26019
		4.39708	0.092685		4.42697	3.23844
		4.40042	0.090778		4.4303	3.2174
		4.40375	0.089049		4.43363	3.19713
		4.40708	0.087559		4.43697	3.17776
		4.41042	0.086606		4.4403	3.15916
		4.41375	0.086129		4.44363	3.14134
		4.41708	0.086188		4.44697	3.12418
		4.42042	0.086665		4.4503	3.10755
		4.42375	0.087619		4.45363	3.09122
		4.42708	0.088811		4.45697	3.07494
		4.43042	0.090182		4.4603	3.05855
		4.43375	0.091553		4.46363	3.0418
		4.43708	0.092685		4.46697	3.02458
		4.44042	0.09346		4.4703	3.0067
		4.44375	0.093877		4.47363	2.98816
		4.44708	0.093818		4.47697	2.96885
		4.45042	0.09346		4.4803	2.94888
		4.45375	0.092745		4.48363	2.92826
		4.45708	0.091672		4.48697	2.90698
		4.46042	0.090361		4.4903	2.8851
		4.46375	0.088871		4.49363	2.86263
		4.46708	0.087261		4.49697	2.83956
		4.47042	0.085652		4.5003	2.8159
		4.47375	0.084162		4.50363	2.79182
		4.47708	0.082791		4.50697	2.76744
		4.48042	0.081658		4.5103	2.74283
		4.48375	0.080705		4.51363	2.71815
		4.48708	0.080049		4.51697	2.69347
		4.49042	0.079632		4.5203	2.66898
		4.49375	0.079334		4.52363	2.64466
		4.49708	0.079095		4.52697	2.62046
		4.50042	0.078797		4.5303	2.59626
		4.50375	0.07838		4.53363	2.57188
		4.50708	0.077724		4.53697	2.54709
		4.51042	0.07689		4.5403	2.52169
		4.51375	0.075817		4.54363	2.49553
		4.51708	0.074565		4.54697	2.46859
		4.52042	0.073373		4.5503	2.44093
		4.52375	0.072241		4.55363	2.41268
		4.52708	0.071287		4.55697	2.38413
		4.53042	0.070691		4.5603	2.35546
		4.53375	0.070393		4.56363	2.32708
		4.53708	0.070393		4.56697	2.29919
		4.54042	0.070751		4.5703	2.27219
		4.54375	0.071287		4.57363	2.24614
		4.54708	0.072062		4.57697	2.22123
		4.55042	0.072896		4.5803	2.19739
		4.55375	0.073791		4.58363	2.17462
		4.55708	0.074744		4.58697	2.1528
		4.56042	0.075758		4.5903	2.13194
		4.56375	0.07683		4.59363	2.11197
		4.56708	0.077963		4.59697	2.09284
		4.57042	0.078976		4.6003	2.07472
		4.57375	0.079989		4.60363	2.05767
		4.57708	0.080764		4.60697	2.042
		4.58042	0.081301		4.6103	2.02799
		4.58375	0.08142		4.61363	2.01613
		4.58708	0.081182		4.61697	2.00701
		4.59042	0.080526		4.6203	2.00105
		4.59375	0.079572		4.62363	1.99884
		4.59708	0.07844		4.62697	2.00093
		4.60042	0.077248		4.6303	2.00766
		4.60375	0.076234		4.63363	2.01946
		4.60708	0.0754		4.63697	2.03639
		4.61042	0.074923		4.6403	2.05851
		4.61375	0.074744		4.64363	2.08563
		4.61708	0.074983		4.64697	2.11722
		4.62042	0.075519		4.6503	2.1528
		4.62375	0.076294		4.65363	2.1916
		4.62708	0.077188		4.65697	2.23285
		4.63042	0.078022		4.6603	2.2757
		4.63375	0.078857		4.66363	2.31922
		4.63708	0.079513		4.66697	2.36249
		4.64042	0.079989		4.6703	2.40463
		4.64375	0.080287		4.67363	2.44474
		4.64708	0.080347		4.67697	2.48212
		4.65042	0.080168		4.6803	2.51609
		4.65375	0.079751		4.68363	2.54619
		4.65708	0.079095		4.68697	2.57194
		4.66042	0.078261		4.6903	2.5931
		4.66375	0.077426		4.69363	2.60949
		4.66708	0.076592		4.69697	2.621
		4.67042	0.075996		4.7003	2.62785
		4.67375	0.075638		4.70363	2.63023
		4.67708	0.075698		4.70697	2.62833
		4.68042	0.076294		4.7103	2.62243
		4.68375	0.077546		4.71363	2.61289
		4.68708	0.079393		4.71697	2.59996
		4.69042	0.081837		4.7203	2.58404
		4.69375	0.084877		4.72363	2.5655
		4.69708	0.088394		4.72697	2.5447
		4.70042	0.092328		4.7303	2.52193
		4.70375	0.096679		4.73363	2.49749
		4.70708	0.101507		4.73697	2.47174
		4.71042	0.106752		4.7403	2.44486
		4.71375	0.112653		4.74363	2.41721
		4.71708	0.119269		4.74697	2.38883
		4.72042	0.126719		4.7503	2.35987
		4.72375	0.135124		4.75363	2.33036
		4.72708	0.144541		4.75697	2.30032
		4.73042	0.155032		4.7603	2.26974
		4.73375	0.166595		4.76363	2.23863
		4.73708	0.179231		4.76697	2.20698
		4.74042	0.192821		4.7703	2.1748
		4.74375	0.207305		4.77363	2.14195
		4.74708	0.222683		4.77697	2.10851
		4.75042	0.238776		4.7803	2.07442
		4.75375	0.255644		4.78363	2.03955
		4.75708	0.273168		4.78697	2.00397
		4.76042	0.291169		4.7903	1.96761
		4.76375	0.309646		4.79363	1.93059
		4.76708	0.328302		4.79697	1.89281
		4.77042	0.347078		4.8003	1.85442
		4.77375	0.365794		4.80363	1.8155
		4.77708	0.384152		4.80697	1.7761
		4.78042	0.402033		4.8103	1.7364
		4.78375	0.419199		4.81363	1.69653
		4.78708	0.435472		4.81697	1.65653
		4.79042	0.45073		4.8203	1.61654
		4.79375	0.464916		4.82363	1.5766
		4.79708	0.47791		4.82697	1.53679
		4.80042	0.489771		4.8303	1.49721
		4.80375	0.500381		4.83363	1.45793
		4.80708	0.509858		4.83697	1.41919
		4.81042	0.518262		4.8403	1.3811
		4.81375	0.525534		4.84363	1.34379
		4.81708	0.531912		4.84697	1.30743
		4.82042	0.537395		4.8503	1.27232
		4.82375	0.541985		4.85363	1.23859
		4.82708	0.54574		4.85697	1.2064
		4.83042	0.548661		4.8603	1.17582
		4.83375	0.550747		4.86363	1.14709
		4.83708	0.551939		4.86697	1.12015
		4.84042	0.552237		4.8703	1.09506
		4.84375	0.551641		4.87363	1.07181
		4.84708	0.550091		4.87697	1.05035
		4.85042	0.547767		4.8803	1.03045
		4.85375	0.544727		4.88363	1.01209
		4.85708	0.541091		4.88697	0.99504
		4.86042	0.537157		4.8903	0.979125
		4.86375	0.532925		4.89363	0.964046
		4.86708	0.528514		4.89697	0.949621
		4.87042	0.523984		4.9003	0.935614
		4.87375	0.519335		4.90363	0.921786
		4.87708	0.514567		4.90697	0.907958
		4.88042	0.509501		4.9103	0.89401
		4.88375	0.504196		4.91363	0.879765
		4.88708	0.498474		4.91697	0.865161
		4.89042	0.492334		4.9203	0.850141
		4.89375	0.485718		4.92363	0.834823
		4.89708	0.478685		4.92697	0.819206
		4.90042	0.471413		4.9303	0.803471
		4.90375	0.463963		4.93363	0.787735
		4.90708	0.456572		4.93697	0.772178
		4.91042	0.449359		4.9403	0.757039
		4.91375	0.442326		4.94363	0.742495
		4.91708	0.43565		4.94697	0.728667
		4.92042	0.429392		4.9503	0.715792
		4.92375	0.423431		4.95363	0.70399
		4.92708	0.417948		4.95697	0.693262
		4.93042	0.412643		4.9603	0.683606
		4.93375	0.407577		4.96363	0.675023
		4.93708	0.40251		4.96697	0.667453
		4.94042	0.397325		4.9703	0.660777
		4.94375	0.39202		4.97363	0.654817
		4.94708	0.386536		4.97697	0.649512
		4.95042	0.380814		4.9803	0.644624
		4.95375	0.374913		4.98363	0.640094
		4.95708	0.368834		4.98697	0.635862
		4.96042	0.362635		4.9903	0.63175
		4.96375	0.356495		4.99363	0.627756
		4.96708	0.350475		4.99697	0.623703
		4.97042	0.344753		5.0003	0.61959
		4.97375	0.339389		5.00363	0.615239
		4.97708	0.334322		5.00697	0.61059
		4.98042	0.329614		5.0103	0.605762
		4.98375	0.325143		5.01363	0.600696
		4.98708	0.320911		5.01697	0.59545
		4.99042	0.316918		5.0203	0.590205
		4.99375	0.312984		5.02363	0.585139
		4.99708	0.309169		5.02697	0.580311
		5.00042	0.305355		5.0303	0.5759
		5.00375	0.30154		5.03363	0.572026
		5.00708	0.297725		5.03697	0.568688
		5.01042	0.293911		5.0403	0.565827
		5.01375	0.290096		5.04363	0.563443
		5.01708	0.286281		5.04697	0.561357
		5.02042	0.282347		5.0503	0.559568
		5.02375	0.278354		5.05363	0.557899
		5.02708	0.274181		5.05697	0.55635
		5.03042	0.270009		5.0603	0.554919
		5.03375	0.265837		5.06363	0.553548
		5.03708	0.261724		5.06697	0.552237
		5.04042	0.25779		5.0703	0.550985
		5.04375	0.254035		5.07363	0.549793
		5.04708	0.250459		5.07697	0.548661
		5.05042	0.24718		5.0803	0.547469
		5.05375	0.244081		5.08363	0.546277
		5.05708	0.24116		5.08697	0.545084
		5.06042	0.23824		5.0903	0.543892
		5.06375	0.235319		5.09363	0.5427
		5.06708	0.232279		5.09697	0.541508
		5.07042	0.228941		5.1003	0.540316
		5.07375	0.225484		5.10363	0.539124
		5.07708	0.221789		5.10697	0.537932
		5.08042	0.218034		5.1103	0.536799
		5.08375	0.214219		5.11363	0.535607
		5.08708	0.210524		5.11697	0.534415
		5.09042	0.207007		5.1203	0.533223
		5.09375	0.203669		5.12363	0.53215
		5.09708	0.200689		5.12697	0.531137
		5.10042	0.198007		5.1303	0.530362
		5.10375	0.195682		5.13363	0.529885
		5.10708	0.193655		5.13697	0.529587
		5.11042	0.191927		5.1403	0.529408
		5.11375	0.190437		5.14363	0.529289
		5.11708	0.189126		5.14697	0.529051
		5.12042	0.187993		5.1503	0.528574
		5.12375	0.18698		5.15363	0.52768
		5.12708	0.185966		5.15697	0.52619
		5.13042	0.184834		5.1603	0.524104
		5.13375	0.183642		5.16363	0.521362
		5.13708	0.182331		5.16697	0.517964
		5.14042	0.18096		5.1703	0.514209
		5.14375	0.179529		5.17363	0.510156
		5.14708	0.178099		5.17697	0.505924
		5.15042	0.176728		5.1803	0.501752
		5.15375	0.175476		5.18363	0.49758
		5.15708	0.174463		5.18697	0.493586
		5.16042	0.173748		5.1903	0.489831
		5.16375	0.173151		5.19363	0.486314
		5.16708	0.172734		5.19697	0.483036
		5.17042	0.172377		5.2003	0.479996
		5.17375	0.1719		5.20363	0.477195
		5.17708	0.171244		5.20697	0.474691
		5.18042	0.17041		5.2103	0.472605
		5.18375	0.169337		5.21363	0.470877
		5.18708	0.167966		5.21697	0.469565
		5.19042	0.166416		5.2203	0.468671
		5.19375	0.164688		5.22363	0.468075
		5.19708	0.162959		5.22697	0.467658
		5.20042	0.16135		5.2303	0.46742
		5.20375	0.15986		5.23363	0.467241
		5.20708	0.158548		5.23697	0.467002
		5.21042	0.157416		5.2403	0.466585
		5.21375	0.156462		5.24363	0.46593
		5.21708	0.155687		5.24697	0.465095
		5.22042	0.155091		5.2503	0.464082
		5.22375	0.154555		5.25363	0.46289
		5.22708	0.153959		5.25697	0.461638
		5.23042	0.153363		5.2603	0.460327
		5.23375	0.152588		5.26363	0.459015
		5.23708	0.151694		5.26697	0.457704
		5.24042	0.150681		5.2703	0.456452
		5.24375	0.149548		5.27363	0.455201
		5.24708	0.148416		5.27697	0.454068
		5.25042	0.147283		5.2803	0.452936
		5.25375	0.14627		5.28363	0.451922
		5.25708	0.145316		5.28697	0.451088
		5.26042	0.144541		5.2903	0.450373
		5.26375	0.143766		5.29363	0.449777
		5.26708	0.143111		5.29697	0.449359
		5.27042	0.142395		5.3003	0.449061
		5.27375	0.141501		5.30363	0.448883
		5.27708	0.140369		5.30697	0.448763
		5.28042	0.138998		5.3103	0.448644
		5.28375	0.137329		5.31363	0.448406
		5.28708	0.135481		5.31697	0.448048
		5.29042	0.133574		5.3203	0.447452
		5.29375	0.131667		5.32363	0.446618
		5.29708	0.129938		5.32697	0.445664
		5.30042	0.128448		5.3303	0.444651
		5.30375	0.127256		5.33363	0.443578
		5.30708	0.126421		5.33697	0.442684
		5.31042	0.125885		5.3403	0.441968
		5.31375	0.125587		5.34363	0.441611
		5.31708	0.125527		5.34697	0.44167
		5.32042	0.125647		5.3503	0.442207
		5.32375	0.125945		5.35363	0.443101
		5.32708	0.126362		5.35697	0.444353
		5.33042	0.126839		5.3603	0.445664
		5.33375	0.127316		5.36363	0.447094
		5.33708	0.127792		5.36697	0.448465
		5.34042	0.12821		5.3703	0.449598
		5.34375	0.128508		5.37363	0.450552
		5.34708	0.128686		5.37697	0.451148
		5.35042	0.128567		5.3803	0.451446
		5.35375	0.12815		5.38363	0.451565
		5.35708	0.127554		5.38697	0.451565
		5.36042	0.12666		5.3903	0.451505
		5.36375	0.125647		5.39363	0.451386
		5.36708	0.124514		5.39697	0.451267
		5.37042	0.123262		5.4003	0.451148
		5.37375	0.122011		5.40363	0.451088
		5.37708	0.120819		5.40697	0.451088
		5.38042	0.119627		5.4103	0.451088
		5.38375	0.118554		5.41363	0.451088
		5.38708	0.117481		5.41697	0.451148
		5.39042	0.116527		5.4203	0.451267
		5.39375	0.115633		5.42363	0.451446
		5.39708	0.114858		5.42697	0.451744
		5.40042	0.114083		5.4303	0.45222
		5.40375	0.113368		5.43363	0.452816
		5.40708	0.112712		5.43697	0.453591
		5.41042	0.112176		5.4403	0.454485
		5.41375	0.111699		5.44363	0.455618
		5.41708	0.111341		5.44697	0.45687
		5.42042	0.111103		5.4503	0.458419
		5.42375	0.111043		5.45363	0.460088
		5.42708	0.111163		5.45697	0.461936
		5.43042	0.111341		5.4603	0.463903
		5.43375	0.111639		5.46363	0.46587
		5.43708	0.111938		5.46697	0.467777
		5.44042	0.112176		5.4703	0.469565
		5.44375	0.112355		5.47363	0.471115
		5.44708	0.112355		5.47697	0.472426
		5.45042	0.112057		5.4803	0.47344
		5.45375	0.111461		5.48363	0.474095
		5.45708	0.110567		5.48697	0.474572
		5.46042	0.109613		5.4903	0.474811
		5.46375	0.1086		5.49363	0.474989
		5.46708	0.107765		5.49697	0.475109
		5.47042	0.10705		5.5003	0.475347
		5.47375	0.106692		5.50363	0.475705
		5.47708	0.106633		5.50697	0.476122
		5.48042	0.10699		5.5103	0.476658
		5.48375	0.107646		5.51363	0.477314
		5.48708	0.10848		5.51697	0.478029
		5.49042	0.109375		5.5203	0.478864
		5.49375	0.11009		5.52363	0.479817
		5.49708	0.110567		5.52697	0.480771
		5.50042	0.110745		5.5303	0.481784
		5.50375	0.110567		5.53363	0.482976
		5.50708	0.11003		5.53697	0.484347
		5.51042	0.109136		5.5403	0.485957
		5.51375	0.108063		5.54363	0.487804
		5.51708	0.106871		5.54697	0.489891
		5.52042	0.105739		5.5503	0.492096
		5.52375	0.104606		5.55363	0.494361
		5.52708	0.103652		5.55697	0.496745
		5.53042	0.102937		5.5603	0.49907
		5.53375	0.102401		5.56363	0.501335
		5.53708	0.102282		5.56697	0.503302
		5.54042	0.10246		5.5703	0.50503
		5.54375	0.103116		5.57363	0.506461
		5.54708	0.104189		5.57697	0.507653
		5.55042	0.105679		5.5803	0.508726
		5.55375	0.107467		5.58363	0.509679
		5.55708	0.109494		5.58697	0.510633
		5.56042	0.111639		5.5903	0.511706
		5.56375	0.113666		5.59363	0.512838
		5.56708	0.115454		5.59697	0.514209
		5.57042	0.116885		5.6003	0.515759
		5.57375	0.117898		5.60363	0.517488
		5.57708	0.118434		5.60697	0.519335
		5.58042	0.118554		5.6103	0.521183
		5.58375	0.118315		5.61363	0.523031
		5.58708	0.117838		5.61697	0.524759
		5.59042	0.117242		5.6203	0.526369
		5.59375	0.116527		5.62363	0.527859
		5.59708	0.115871		5.62697	0.52917
		5.60042	0.115156		5.6303	0.530362
		5.60375	0.114501		5.63363	0.531375
		5.60708	0.113845		5.63697	0.532269
		5.61042	0.113189		5.6403	0.532925
		5.61375	0.112534		5.64363	0.533342
		5.61708	0.111878		5.64697	0.533521
		5.62042	0.111222		5.6503	0.533462
		5.62375	0.110626		5.65363	0.533223
		5.62708	0.110149		5.65697	0.532806
		5.63042	0.109792		5.6603	0.532269
		5.63375	0.109553		5.66363	0.531614
		5.63708	0.109434		5.66697	0.531018
		5.64042	0.109434		5.6703	0.530541
		5.64375	0.109553		5.67363	0.530183
		5.64708	0.109732		5.67697	0.530064
		5.65042	0.109911		5.6803	0.530243
		5.65375	0.11003		5.68363	0.53066
		5.65708	0.11003		5.68697	0.531316
		5.66042	0.109911		5.6903	0.53221
		5.66375	0.109613		5.69363	0.533342
		5.66708	0.109136		5.69697	0.534534
		5.67042	0.10848		5.7003	0.535667
		5.67375	0.107706		5.70363	0.53674
		5.67708	0.10699		5.70697	0.537634
		5.68042	0.106335		5.7103	0.53817
		5.68375	0.105917		5.71363	0.538409
		5.68708	0.105739		5.71697	0.53823
		5.69042	0.105917		5.7203	0.537694
		5.69375	0.106394		5.72363	0.536859
		5.69708	0.107169		5.72697	0.535846
		5.70042	0.108063		5.7303	0.534773
		5.70375	0.108898		5.73363	0.5337
		5.70708	0.109553		5.73697	0.532687
		5.71042	0.109911		5.7403	0.531852
		5.71375	0.11003		5.74363	0.531137
		5.71708	0.109851		5.74697	0.530601
		5.72042	0.109434		5.7503	0.530183
		5.72375	0.108898		5.75363	0.529945
		5.72708	0.108421		5.75697	0.529766
		5.73042	0.108063		5.7603	0.529766
		5.73375	0.108004		5.76363	0.529945
		5.73708	0.108242		5.76697	0.530183
		5.74042	0.108719		5.7703	0.53066
		5.74375	0.109255		5.77363	0.531256
		5.74708	0.109673		5.77697	0.531971
		5.75042	0.109911		5.7803	0.532866
		5.75375	0.109911		5.78363	0.533879
		5.75708	0.109494		5.78697	0.534892
		5.76042	0.108778		5.7903	0.535846
		5.76375	0.107706		5.79363	0.53674
		5.76708	0.106454		5.79697	0.537455
		5.77042	0.105143		5.8003	0.537872
		5.77375	0.10401		5.80363	0.538051
		5.77708	0.103056		5.80697	0.537932
		5.78042	0.10246		5.8103	0.537515
		5.78375	0.102103		5.81363	0.53674
		5.78708	0.101984		5.81697	0.535846
		5.79042	0.102162		5.8203	0.534832
		5.79375	0.10246		5.82363	0.533819
		5.79708	0.102937		5.82697	0.533044
		5.80042	0.103533		5.8303	0.532389
		5.80375	0.104249		5.83363	0.532031
		5.80708	0.105023		5.83697	0.531852
		5.81042	0.105798		5.8403	0.531852
		5.81375	0.106573		5.84363	0.532031
		5.81708	0.107288		5.84697	0.53221
		5.82042	0.107884		5.8503	0.532329
		5.82375	0.108361		5.85363	0.532269
		5.82708	0.108659		5.85697	0.531971
		5.83042	0.108898		5.8603	0.531554
		5.83375	0.108957		5.86363	0.531018
		5.83708	0.108898		5.86697	0.530422
		5.84042	0.108778		5.8703	0.529945
		5.84375	0.108659		5.87363	0.529647
		5.84708	0.10854		5.87697	0.529647
		5.85042	0.108361		5.8803	0.529945
		5.85375	0.108123		5.88363	0.530601
		5.85708	0.107825		5.88697	0.531495
		5.86042	0.107408		5.8903	0.532568
		5.86375	0.106931		5.89363	0.53376
		5.86708	0.106454		5.89697	0.535011
		5.87042	0.106037		5.9003	0.536084
		5.87375	0.105739		5.90363	0.537097
		5.87708	0.10556		5.90697	0.537813
		5.88042	0.10556		5.9103	0.538349
		5.88375	0.105798		5.91363	0.538647
		5.88708	0.106215		5.91697	0.538826
		5.89042	0.106812		5.9203	0.538886
		5.89375	0.107467		5.92363	0.538826
		5.89708	0.108302		5.92697	0.538826
		5.90042	0.109196		5.9303	0.538826
		5.90375	0.110328		5.93363	0.538886
		5.90708	0.111759		5.93697	0.539005
		5.91042	0.113487		5.9403	0.539124
		5.91375	0.115454		5.94363	0.539243
		5.91708	0.117719		5.94697	0.539362
		5.92042	0.120223		5.9503	0.539362
		5.92375	0.122726		5.95363	0.539184
		5.92708	0.12517		5.95697	0.538886
		5.93042	0.127375		5.9603	0.538409
		5.93375	0.129163		5.96363	0.537813
		5.93708	0.130475		5.96697	0.537038
		5.94042	0.131249		5.9703	0.536084
		5.94375	0.131607		5.97363	0.534892
		5.94708	0.131667		5.97697	0.533521
		5.95042	0.131607		5.9803	0.531971
		5.95375	0.131488		5.98363	0.530243
		5.95708	0.131488		5.98697	0.528276
		5.96042	0.131667		5.9903	0.526249
		5.96375	0.131965		5.99363	0.524044
		5.96708	0.132322		5.99697	0.521839
		5.97042	0.13268		6.0003	0.519753
		5.97375	0.132918		6.00363	0.517845
		5.97708	0.132918		6.00697	0.516176
		5.98042	0.13262		6.0103	0.514686
		5.98375	0.131965		6.01363	0.513494
		5.98708	0.130892		6.01697	0.512481
		5.99042	0.12958		6.0203	0.511646
		5.99375	0.127971		6.02363	0.510931
		5.99708	0.126243		6.02697	0.510275
		6.00042	0.124454		6.0303	0.50962
		6.00375	0.122786		6.03363	0.509024
		6.00708	0.121236		6.03697	0.508368
		6.01042	0.119925		6.0403	0.507772
		6.01375	0.118911		6.04363	0.507236
		6.01708	0.118136		6.04697	0.506759
		6.02042	0.1176		6.0503	0.506341
		6.02375	0.117302		6.05363	0.505805
		6.02708	0.117123		6.05697	0.505269
		6.03042	0.117004		6.0603	0.504613
		6.03375	0.116885		6.06363	0.503898
		6.03708	0.116765		6.06697	0.503063
		6.04042	0.116587		6.0703	0.50211
		6.04375	0.116348		6.07363	0.501037
		6.04708	0.116169		6.07697	0.499964
		6.05042	0.11605		6.0803	0.498831
		6.05375	0.115991		6.08363	0.497818
		6.05708	0.115991		6.08697	0.496924
		6.06042	0.11605		6.0903	0.496149
		6.06375	0.11611		6.09363	0.495374
		6.06708	0.116229		6.09697	0.49454
		6.07042	0.116348		6.1003	0.493705
		6.07375	0.116408		6.10363	0.492752
		6.07708	0.116467		6.10697	0.491738
		6.08042	0.116527		6.1103	0.490546
		6.08375	0.116587		6.11363	0.489295
		6.08708	0.116765		6.11697	0.487924
		6.09042	0.116944		6.1203	0.486553
		6.09375	0.117242		6.12363	0.485182
		6.09708	0.11754		6.12697	0.48393
		6.10042	0.117779		6.1303	0.482738
		6.10375	0.118017		6.13363	0.481606
		6.10708	0.118196		6.13697	0.480533
		6.11042	0.118375		6.1403	0.47946
		6.11375	0.118494		6.14363	0.478387
		6.11708	0.118732		6.14697	0.477314
		6.12042	0.118911		6.1503	0.476182
		6.12375	0.11915		6.15363	0.475109
		6.12708	0.119328		6.15697	0.474155
		6.13042	0.119507		6.1603	0.47332
		6.13375	0.119567		6.16363	0.472665
		6.13708	0.119507		6.16697	0.472248
		6.14042	0.11915		6.1703	0.472009
		6.14375	0.118494		6.17363	0.47195
		6.14708	0.117481		6.17697	0.47195
		6.15042	0.11611		6.1803	0.472069
		6.15375	0.11462		6.18363	0.472069
		6.15708	0.11301		6.18697	0.47183
		6.16042	0.11152		6.1903	0.471413
		6.16375	0.110209		6.19363	0.470698
		6.16708	0.109255		6.19697	0.469685
		6.17042	0.108778		6.2003	0.468433
		6.17375	0.108838		6.20363	0.466883
		6.17708	0.109255		6.20697	0.465095
		6.18042	0.11009		6.2103	0.463188
		6.18375	0.111163		6.21363	0.46128
		6.18708	0.112295		6.21697	0.459433
		6.19042	0.113368		6.2203	0.457704
		6.19375	0.114262		6.22363	0.456095
		6.19708	0.114918		6.22697	0.454724
		6.20042	0.115395		6.2303	0.453532
		6.20375	0.115573		6.23363	0.452459
		6.20708	0.115693		6.23697	0.451624
		6.21042	0.115693		6.2403	0.450969
		6.21375	0.115633		6.24363	0.450313
		6.21708	0.115514		6.24697	0.449717
		6.22042	0.115395		6.2503	0.449061
		6.22375	0.115216		6.25363	0.448346
		6.22708	0.114977		6.25697	0.447631
		6.23042	0.114739		6.2603	0.446856
		6.23375	0.114501		6.26363	0.446081
		6.23708	0.114202		6.26697	0.445247
		6.24042	0.113964		6.2703	0.444472
		6.24375	0.113785		6.27363	0.443637
		6.24708	0.113785		6.27697	0.442922
		6.25042	0.114024		6.2803	0.442207
		6.25375	0.114441		6.28363	0.441611
		6.25708	0.115097		6.28697	0.441134
		6.26042	0.115991		6.2903	0.440717
		6.26375	0.117004		6.29363	0.440359
		6.26708	0.118136		6.29697	0.439942
		6.27042	0.119388		6.3003	0.439525
		6.27375	0.12064		6.30363	0.438929
		6.27708	0.121951		6.30697	0.438333
		6.28042	0.123203		6.3103	0.437677
		6.28375	0.124514		6.31363	0.436962
		6.28708	0.125706		6.31697	0.436127
		6.29042	0.126958		6.3203	0.435174
		6.29375	0.12815		6.32363	0.43416
		6.29708	0.129282		6.32697	0.433087
		6.30042	0.130355		6.3303	0.431955
		6.30375	0.131488		6.33363	0.430822
		6.30708	0.132501		6.33697	0.429571
		6.31042	0.133574		6.3403	0.42814
		6.31375	0.134528		6.34363	0.42659
		6.31708	0.135422		6.34697	0.424922
		6.32042	0.136197		6.3503	0.423133
		6.32375	0.136912		6.35363	0.421405
		6.32708	0.137508		6.35697	0.419736
		6.33042	0.137925		6.3603	0.418186
		6.33375	0.138223		6.36363	0.416815
		6.33708	0.138223		6.36697	0.415623
		6.34042	0.138044		6.3703	0.41467
		6.34375	0.137746		6.37363	0.413954
		6.34708	0.137389		6.37697	0.413358
		6.35042	0.13715		6.3803	0.413001
		6.35375	0.136971		6.38363	0.412583
		6.35708	0.137031		6.38697	0.412166
		6.36042	0.137329		6.3903	0.41163
		6.36375	0.137985		6.39363	0.410914
		6.36708	0.138938		6.39697	0.41008
		6.37042	0.14019		6.4003	0.409126
		6.37375	0.141501		6.40363	0.408173
		6.37708	0.142872		6.40697	0.407279
		6.38042	0.144184		6.4103	0.406504
		6.38375	0.145257		6.41363	0.405908
		6.38708	0.14621		6.41697	0.40561
		6.39042	0.146866		6.4203	0.40555
		6.39375	0.147402		6.42363	0.405788
		6.39708	0.14776		6.42697	0.406265
		6.40042	0.147998		6.4303	0.406802
		6.40375	0.148177		6.43363	0.407398
		6.40708	0.148296		6.43697	0.407934
		6.41042	0.148475		6.4403	0.408411
		6.41375	0.148654		6.44363	0.408828
		6.41708	0.148833		6.44697	0.409126
		6.42042	0.148952		6.4503	0.409365
		6.42375	0.148952		6.45363	0.409484
		6.42708	0.148833		6.45697	0.409544
		6.43042	0.148475		6.4603	0.409603
		6.43375	0.147879		6.46363	0.409603
		6.43708	0.146985		6.46697	0.409663
		6.44042	0.145912		6.4703	0.409782
		6.44375	0.144601		6.47363	0.409901
		6.44708	0.14317		6.47697	0.41002
		6.45042	0.14174		6.4803	0.41014
		6.45375	0.140309		6.48363	0.410318
		6.45708	0.138998		6.48697	0.410557
		6.46042	0.137866		6.4903	0.410795
		6.46375	0.136971		6.49363	0.411034
		6.46708	0.136435		6.49697	0.411153
		6.47042	0.136256		6.5003	0.411212
		6.47375	0.136435		6.50363	0.411093
		6.47708	0.136971		6.50697	0.410974
		6.48042	0.137866		6.5103	0.410736
		6.48375	0.139177		6.51363	0.410557
		6.48708	0.140846		6.51697	0.410378
		6.49042	0.142753		6.5203	0.410199
		6.49375	0.144899		6.52363	0.41008
		6.49708	0.147045		6.52697	0.41002
		6.50042	0.149131		6.5303	0.41008
		6.50375	0.150979		6.53363	0.41014
		6.50708	0.152409		6.53697	0.41008
		6.51042	0.153422		6.5403	0.409901
		6.51375	0.15384		6.54363	0.409484
		6.51708	0.15378		6.54697	0.408769
		6.52042	0.153244		6.5503	0.407875
		6.52375	0.152349		6.55363	0.406742
		6.52708	0.151336		6.55697	0.40549
		6.53042	0.150263		6.5603	0.404179
		6.53375	0.14931		6.56363	0.402987
		6.53708	0.148654		6.56697	0.402033
		6.54042	0.148356		6.5703	0.401318
		6.54375	0.148416		6.57363	0.400901
		6.54708	0.148892		6.57697	0.400782
		6.55042	0.149548		6.5803	0.400901
		6.55375	0.150383		6.58363	0.401199
		6.55708	0.151336		6.58697	0.401556
		6.56042	0.152349		6.5903	0.401795
		6.56375	0.153303		6.59363	0.401855
		6.56708	0.154078		6.59697	0.401676
		6.57042	0.154734		6.6003	0.401258
		6.57375	0.155151		6.60363	0.400603
		6.57708	0.155389		6.60697	0.399828
		6.58042	0.155509		6.6103	0.398934
		6.58375	0.155389		6.61363	0.39798
		6.58708	0.155091		6.61697	0.396967
		6.59042	0.154495		6.6203	0.395954
		6.59375	0.153661		6.62363	0.39506
		6.59708	0.152707		6.62697	0.394166
		6.60042	0.151575		6.6303	0.393331
		6.60375	0.150442		6.63363	0.392556
		6.60708	0.149369		6.63697	0.391841
		6.61042	0.148356		6.6403	0.391304
		6.61375	0.147581		6.64363	0.390887
		6.61708	0.146985		6.64697	0.390768
		6.62042	0.146687		6.6503	0.390828
		6.62375	0.146508		6.65363	0.391066
		6.62708	0.146568		6.65697	0.391424
		6.63042	0.146687		6.6603	0.391841
		6.63375	0.146866		6.66363	0.392139
		6.63708	0.147104		6.66697	0.392377
		6.64042	0.147402		6.6703	0.392377
		6.64375	0.147641		6.67363	0.392139
		6.64708	0.147939		6.67697	0.391603
		6.65042	0.148356		6.6803	0.390828
		6.65375	0.148773		6.68363	0.389874
[truncated: 2,504 more rows]

## Sheet: 2E
			Fig 2E. The PAD6 fluorescence was analyzed by flow cytometry
		X axis	y axis: RFU (Ex/Em: 405/525) normalized to the maximum fluorecence
		Time (h)	Inducible-PC6				Inducible-PC6+Dox				Inducible-PC6+CZ48				Inducible-PC6+Dox+CZ48				SARM1-KO-PC6				PSARM1-KO-C6+Dox+CZ48
		0	0.023229	0.022658	0.038816	0.0384958	0.023229	0.022658	0.0388156	0.038496	0.023229	0.0226581	0.0388156	0.0384958	0.023229	0.0226581	0.0388156	0.0384958	NA	NA	NA	NA	NA	NA	NA	NA
		4	0.0437637	0.047367	0.068263	0.0762773	0.069323	0.061085	0.0846724	0.100687	0.048522	0.0537455	0.0761548	0.078155	0.0655331	0.0718648	0.0964828	0.102021	NA	NA	NA	NA	NA	NA	NA	NA
		8	0.0479951	0.054079	0.076794	0.0846452	0.089961	0.07894	0.113409	0.126213	0.084311	0.0957887	0.132131	0.124389	0.139948	0.158896	0.210191	0.212069	NA	NA	NA	NA	NA	NA	NA	NA
		12	0.0516763	0.058442	0.079448	0.0870263	0.107809	0.091294	0.138268	0.151793	0.1791	0.191903	0.228737	0.220478	0.357262	0.425803	0.463991	0.459582	NA	NA	NA	NA	NA	NA	NA	NA
		16	0.0551018	0.061247	0.085951	0.0901014	0.110397	0.104329	0.137043	0.156963	0.432157	0.518817	0.447976	0.454249	0.885891	1	0.87689	1	0.063147	0.065283	0.038269	0.039858	0.071352	0.081053	0.051366	0.056946
								P value (T tests)
							Time (h)	PC6+CZ48 vs PC6+Dox	PC6+Dox+CZ48 vs PC6+Dox
							0	0.999997	0.999998
							4	0.248599	0.701956
							8	0.669815	0.01021
							12	0.003824	3.8e-05
							16	6e-06	<0.000001

## Sheet: 2G
					Fig 2G. Quantification of the cell fluorescence in Fig 2F
					X axis	Y axis: RFU								P value (T tests)
					Time (h)	NAMAT1-KO			293T				Time (h)	NMNAT1-KO vs 293T
					48	771.433	887.033	811.86	140.877	123.163	129.227		48	3.5e-05
					36	806.27	952.813	887.1	118.877	101.487	107.077		36	5.5e-05
					24	953.05	994.123	951.157	113.75	99.77	110.747		24	<0.000001
					12	842.153	836.217	808.877	94.08	99.72	103.747		12	<0.000001
					6	631.917	599.997	638.49	82.3367	103.437	101.953		6	3e-06
					0	126.167	92.5167	105.553	101.447	86.3333	80.7967		0	0.184297
