# Supplementary material for: Permeant fluorescent probes visualize the activation of SARM1 and uncover an anti-neurodegenerative drug candidate
Source: eLife. 2021 May 4;10:e67381. doi: 10.7554/eLife.67381 (PMC8143800; doi:10.7554/eLife.67381)
Supplement: Figure 3—source data 1. [file elife-67381-fig3-data1.xlsx]

## Sheet: 3B
	Fig 3B. Knockdown efficiency of Sarm1
		Expression level normalized to Scr				P value (T test)
	Scr	1.00205	1.12811	1.01055		Scr vs KD
	KD	0.245689	0.126153	0.116296		0.000109

## Sheet: 3D
		Fig 3D. Quantification of the fluorescence intensity of PAD6 in DRGs
		X axis	y axis: RFU (Ex/Em: 405/525) normalized to the maximum fluorecence
		Time (h)	WT-CTRL					WT-CZ-48					WT-VCR					KD-CTRL				KD-VCR
		24	0.396869	0.387017	0.411499	0.452595	0.38808	0.685302	0.735115	0.71275	0.598442	0.661367	0.73797	0.799235	0.846943	0.837334	0.923415	0.244532	0.330521	0.311153	0.247114	0.590109	0.607726	0.573029	0.550764
		16	0.331939	0.340454	0.396717	0.349465	0.328577	0.850598	0.801311	0.856845	0.734214	0.750009	1.0178	0.890854	1.0833	0.915143	0.937863	0.250901	0.318787	0.360501	0.320042	0.517231	0.565941	0.620048	0.590615
		12	0.372428	0.33608	0.352006	0.363184	0.376882	1.0828	1.0147	0.99201	0.9709	0.939594	0.851894	0.807608	0.929601	0.821935	0.838397	0.25651	0.363487	0.35232	0.323687	0.43269	0.423993	0.510012	0.447016
		8	0.2979	0.323444	0.333275	0.31578	0.311912	1.06575	0.902558	0.907215	0.975273	0.908926	0.569525	0.444981	0.543161	0.420074	0.517505	0.285497	0.370484	0.357473	0.313431	0.230631	0.315334	0.35067	0.352613
		4	0.277751	0.347501	0.3418	0.365604	0.359782	0.870169	0.833649	0.727329	0.819667	0.776505	0.264488	0.283836	0.282955	0.24112	0.285578	NA	NA	NA	NA	NA	NA	NA	NA
		0	0.221954	0.290174	0.264215	0.288828	0.27599	0.201269	0.261623	0.257644	0.287107	0.195043	0.216264	0.160639	0.188127	0.138132	0.162249	0.134325	0.177881	0.176018	0.181536	0.195944	0.175279	0.205886	0.225093

## Sheet: 3E
				Fig 3E. Intracellular cADPR contents
			X axis	y axis: cADPR / protein( pmol/mg)											P value (T test)
			Time (h)	CTRL			CZ-48			VCR				Time (h)	CTRL vs CZ-48	CTRL vs VCR
			0	10.4965	10.8393	3.69017	10.4965	10.8393	3.69017	10.4965	10.8393	3.69017		0	>0.999999	>0.999999
			12	NA	NA	NA	285.325	260.096	217.291	37.5038	34.4862	39.8045		12	NA	NA
			24	7.79971	4.0188	3.87226	355.544	329.205	287.353	142.418	138.822	110.694		24	8.9e-05	0.000243
			48	13.5836	7.96851	3.18719	299.97	283.866	251.759	40.5333	75.5648	10.3681		48	4.9e-05	0.150112

## Sheet: 3F
			Fig 3F. Indices of AxD
		X axis	y axis: AxD index
		Time (h)	WT-CTRL					WT-CZ-48					WT-VCR					KD-CTRL				KD-VCR
		0	0.101745	0.0265626	0.130516	0.185731	0.108663	0.0276697	0.054927	0.017356	0.099077	0.030867	0.0058514	0.024786	0.00936785	0.019493	0.036889	0.038012	0.060526	0.035882	0.023246	0.011947	0.046121	0.044552	0.031982
		4	0.1281	0.0784334	0.194798	0.245673	0.120369	0.0749083	0.088615	0.034614	0.129847	0.042855	0.0252938	0.028858	0.0125136	0.047791	0.045716	NA	NA	NA	NA	NA	NA	NA	NA
		8	0.079431	0.0318409	0.085517	0.059197	0.0671	0.0402681	0.027956	0.03089	0.053883	0.025676	0.0266725	0.030569	0.0216101	0.045308	0.053213	0.026169	0.049692	0.051895	0.028226	0.009485	0.040398	0.031556	0.031121
		12	0.060341	0.0279531	0.084195	0.061042	0.04978	0.0469929	0.043506	0.031756	0.071177	0.045614	0.0171249	0.030523	0.0192771	0.040434	0.0558	0.017593	0.059364	0.046491	0.040223	0.014155	0.03461	0.043021	0.029648
		16	0.064216	0.0201289	0.081562	0.059847	0.062148	0.0799853	0.084927	0.040413	0.128286	0.0934	0.0249231	0.044817	0.0350233	0.054962	0.075223	0.026573	0.074912	0.047206	0.03595	0.019876	0.043404	0.046081	0.037636
		24	0.058002	0.0194658	0.055315	0.053424	0.05959	0.206827	0.160605	0.066973	0.257958	0.165243	0.0361734	0.087788	0.150359	0.084956	0.128097	0.024924	0.073062	0.053108	0.034537	0.022451	0.046816	0.034052	0.036918
		36	0.071654	0.0180421	0.063513	0.060309	0.055384	0.246013	0.204737	0.043368	0.311715	0.176895	0.292306	0.211534	0.267372	0.297204	0.403099	0.018326	0.04197	0.031443	0.026698	0.020339	0.080349	0.0675	0.03847
		48	0.08262	0.0327436	0.067764	0.050335	0.072336	0.209696	0.081721	0.041543	0.354251	0.204917	0.449079	0.595277	0.394221	0.47346	0.45952	0.036162	0.036596	0.023832	0.022118	0.027	0.066354	0.061663	0.037199
		72	0.056607	0.0369707	0.093599	0.073599	0.133249	0.156957	0.071118	0.031177	0.355825	0.212133	0.714466	0.636605	0.585727	0.748197	0.764122	0.023052	0.070444	0.060202	0.03894	0.057663	0.210861	0.248483	0.065661
														P value (T test)
													Time (h)	WT-CTRL vs WT-VCR
													0	0.008348
													4	0.00396
													8	0.030567
													12	0.071708
													16	0.449183
													24	0.050903
													36	7.7e-05
													48	2e-06
													72	<0.000001
