# Supplementary material for: Permeant fluorescent probes visualize the activation of SARM1 and uncover an anti-neurodegenerative drug candidate
Source: eLife. 2021 May 4;10:e67381. doi: 10.7554/eLife.67381 (PMC8143800; doi:10.7554/eLife.67381)
Supplement: Figure 4—figure supplement 1—source data 1. [file elife-67381-fig4-figsupp1-data1.xlsx]

## Sheet: Fig4-supp1A
			Fig4-s1A. The inhibition curves of nicotinamide to SARM1-dN
			log (μM)	Inhibition (%)
			4	99.7425	99.6903	98.8376
			3.39794	93.8851	94.8319	94.9295
			2.79588	82.5536	82.9295	81.5896
			2.19382	54.6315	52.7404	53.2266
			1.59176	16.2305	19.7142	26.2183
			0.9897	5.78702	3.7236	3.94564
			0.38764	5.28552	4.61941	4.92567
			log(inhibitor) vs. normalized response -- Variable slope
			95% CI (profile likelihood)
			LogIC50	2.110 to 2.179
			HillSlope	0.9639 to 1.120
			IC50	128.7 to 151.1

## Sheet: Fig4-supp1B
	Fig4-s1B. HPLC analysis of NSDP after treating by UV
	NSDP			NSDP-UV			dHN			dHNN
	Time (min)	mAU (275 nm)		Time (min)	mAU (275 nm)		Time (min)	mAU (275 nm)		Time (min)	mAU (275 nm)
	0.001767	0.004351		0.0028	-0.04059		0.00135	0.00155		0.001667	-0.01538
	0.0051	0.004232		0.006133	-0.04089		0.004683	0.00155		0.005	-0.0152
	0.008433	0.003994		0.009467	-0.04125		0.008017	0.001609		0.008333	-0.01502
	0.011767	0.003517		0.0128	-0.04166		0.01135	0.001729		0.011667	-0.0149
	0.0151	0.00298		0.016133	-0.04208		0.014683	0.001848		0.015	-0.01466
	0.018433	0.002444		0.019467	-0.04238		0.018017	0.002027		0.018333	-0.01436
	0.021767	0.001907		0.0228	-0.04256		0.02135	0.002146		0.021667	-0.01395
	0.0251	0.00149		0.026133	-0.04262		0.024683	0.002265		0.025	-0.01341
	0.028433	0.001252		0.029467	-0.0425		0.028017	0.002384		0.028333	-0.01281
	0.031767	0.001073		0.0328	-0.04226		0.03135	0.002503		0.031667	-0.01204
	0.0351	0.001073		0.036133	-0.0419		0.034683	0.002563		0.035	-0.01127
	0.038433	0.001192		0.039467	-0.04148		0.038017	0.002623		0.038333	-0.01055
	0.041767	0.001311		0.0428	-0.04101		0.04135	0.002682		0.041667	-0.00983
	0.0451	0.00149		0.046133	-0.04059		0.044683	0.002742		0.045	-0.00924
	0.048433	0.001609		0.049467	-0.04023		0.048017	0.002742		0.048333	-0.00888
	0.051767	0.001609		0.0528	-0.03999		0.05135	0.002801		0.051667	-0.0087
	0.0551	0.00155		0.056133	-0.03988		0.054683	0.002921		0.055	-0.00882
	0.058433	0.001371		0.059467	-0.03988		0.058017	0.00298		0.058333	-0.00912
	0.061767	0.001073		0.0628	-0.03999		0.06135	0.003099		0.061667	-0.0096
	0.0651	0.000775		0.066133	-0.04023		0.064683	0.003278		0.065	-0.01019
	0.068433	0.000417		0.069467	-0.04053		0.068017	0.003457		0.068333	-0.01085
	0.071767	5.96e-05		0.0728	-0.04089		0.07135	0.003636		0.071667	-0.01144
	0.0751	-0.0003		0.076133	-0.04125		0.074683	0.003815		0.075	-0.01192
	0.078433	-0.0006		0.079467	-0.04166		0.078017	0.003994		0.078333	-0.01228
	0.081767	-0.00077		0.0828	-0.04202		0.08135	0.004113		0.081667	-0.01246
	0.0851	-0.00095		0.086133	-0.04238		0.084683	0.004232		0.085	-0.0124
	0.088433	-0.00095		0.089467	-0.04268		0.088017	0.004351		0.088333	-0.01222
	0.091767	-0.00101		0.0928	-0.04297		0.09135	0.004411		0.091667	-0.01192
	0.0951	-0.00095		0.096133	-0.04321		0.094683	0.004351		0.095	-0.01156
	0.098433	-0.00095		0.099467	-0.04345		0.098017	0.004292		0.098333	-0.01127
	0.101767	-0.00101		0.1028	-0.04363		0.10135	0.004172		0.101667	-0.01097
	0.1051	-0.00119		0.106133	-0.04369		0.104683	0.003994		0.105	-0.01079
	0.108433	-0.00149		0.109467	-0.04375		0.108017	0.003755		0.108333	-0.01079
	0.111767	-0.00185		0.1128	-0.04375		0.11135	0.003576		0.111667	-0.01085
	0.1151	-0.00226		0.116133	-0.04369		0.114683	0.003338		0.115	-0.01103
	0.118433	-0.00286		0.119467	-0.04357		0.118017	0.003099		0.118333	-0.01127
	0.121767	-0.00346		0.1228	-0.04345		0.12135	0.002861		0.121667	-0.01156
	0.1251	-0.00399		0.126133	-0.04339		0.124683	0.002623		0.125	-0.01186
	0.128433	-0.00453		0.129467	-0.04333		0.128017	0.002444		0.128333	-0.0121
	0.131767	-0.00495		0.1328	-0.04327		0.13135	0.002205		0.131667	-0.01222
	0.1351	-0.00525		0.136133	-0.04333		0.134683	0.002027		0.135	-0.01222
	0.138433	-0.00542		0.139467	-0.04339		0.138017	0.001788		0.138333	-0.01216
	0.141767	-0.00548		0.1428	-0.04357		0.14135	0.00155		0.141667	-0.01192
	0.1451	-0.00542		0.146133	-0.04375		0.144683	0.001311		0.145	-0.01168
	0.148433	-0.0053		0.149467	-0.04393		0.148017	0.001132		0.148333	-0.01138
	0.151767	-0.00519		0.1528	-0.04411		0.15135	0.000954		0.151667	-0.01109
	0.1551	-0.00495		0.156133	-0.04429		0.154683	0.000834		0.155	-0.01091
	0.158433	-0.00477		0.159467	-0.04441		0.158017	0.000715		0.158333	-0.01073
	0.161767	-0.00465		0.1628	-0.04452		0.16135	0.000715		0.161667	-0.01067
	0.1651	-0.00447		0.166133	-0.04464		0.164683	0.000715		0.165	-0.01073
	0.168433	-0.00435		0.169467	-0.0447		0.168017	0.000775		0.168333	-0.01085
	0.171767	-0.00423		0.1728	-0.04488		0.17135	0.000894		0.171667	-0.01109
	0.1751	-0.00411		0.176133	-0.045		0.174683	0.001132		0.175	-0.01138
	0.178433	-0.00393		0.179467	-0.04524		0.178017	0.001371		0.178333	-0.01174
	0.181767	-0.0037		0.1828	-0.04548		0.18135	0.001669		0.181667	-0.01204
	0.1851	-0.0034		0.186133	-0.04578		0.184683	0.002086		0.185	-0.01234
	0.188433	-0.00304		0.189467	-0.04601		0.188017	0.002503		0.188333	-0.01258
	0.191767	-0.00262		0.1928	-0.04631		0.19135	0.00298		0.191667	-0.0127
	0.1951	-0.00221		0.196133	-0.04649		0.194683	0.003397		0.195	-0.0127
	0.198433	-0.00173		0.199467	-0.04661		0.198017	0.003874		0.198333	-0.01264
	0.201767	-0.00125		0.2028	-0.04661		0.20135	0.004351		0.201667	-0.01246
	0.2051	-0.00077		0.206133	-0.04655		0.204683	0.004828		0.205	-0.01216
	0.208433	-0.00042		0.209467	-0.04637		0.208017	0.005245		0.208333	-0.01186
	0.211767	-0.00012		0.2128	-0.04613		0.21135	0.005543		0.211667	-0.0115
	0.2151	0		0.216133	-0.04584		0.214683	0.005782		0.215	-0.01109
	0.218433	0		0.219467	-0.04548		0.218017	0.005901		0.218333	-0.01079
	0.221767	-0.00018		0.2228	-0.04506		0.22135	0.00596		0.221667	-0.01049
	0.2251	-0.00048		0.226133	-0.04464		0.224683	0.005841		0.225	-0.01031
	0.228433	-0.00089		0.229467	-0.04423		0.228017	0.005603		0.228333	-0.01019
	0.231767	-0.00137		0.2328	-0.04375		0.23135	0.005245		0.231667	-0.01013
	0.2351	-0.00185		0.236133	-0.04339		0.234683	0.004828		0.235	-0.01013
	0.238433	-0.00232		0.239467	-0.04297		0.238017	0.004292		0.238333	-0.01025
	0.241767	-0.00274		0.2428	-0.04268		0.24135	0.003755		0.241667	-0.01043
	0.2451	-0.0031		0.246133	-0.0425		0.244683	0.003278		0.245	-0.01073
	0.248433	-0.00334		0.249467	-0.04238		0.248017	0.002861		0.248333	-0.01103
	0.251767	-0.00352		0.2528	-0.04238		0.25135	0.002503		0.251667	-0.01138
	0.2551	-0.00358		0.256133	-0.0425		0.254683	0.002325		0.255	-0.0118
	0.258433	-0.00358		0.259467	-0.04274		0.258017	0.002265		0.258333	-0.01222
	0.261767	-0.00352		0.2628	-0.04303		0.26135	0.002325		0.261667	-0.01264
	0.2651	-0.00334		0.266133	-0.04339		0.264683	0.002503		0.265	-0.01299
	0.268433	-0.00316		0.269467	-0.04381		0.268017	0.002742		0.268333	-0.01329
	0.271767	-0.00286		0.2728	-0.04417		0.27135	0.003099		0.271667	-0.01353
	0.2751	-0.00244		0.276133	-0.04447		0.274683	0.003397		0.275	-0.01359
	0.278433	-0.00203		0.279467	-0.0447		0.278017	0.003755		0.278333	-0.01359
	0.281767	-0.00155		0.2828	-0.04488		0.28135	0.004053		0.281667	-0.01341
	0.2851	-0.00107		0.286133	-0.045		0.284683	0.004232		0.285	-0.01317
	0.288433	-0.00066		0.289467	-0.04506		0.288017	0.004351		0.288333	-0.01281
	0.291767	-0.0003		0.2928	-0.04512		0.29135	0.004351		0.291667	-0.01246
	0.2951	-0.00012		0.296133	-0.04518		0.294683	0.004351		0.295	-0.01204
	0.298433	-0.00012		0.299467	-0.04524		0.298017	0.004232		0.298333	-0.01162
	0.301767	-0.00024		0.3028	-0.04542		0.30135	0.004113		0.301667	-0.01127
	0.3051	-0.0006		0.306133	-0.0456		0.304683	0.003994		0.305	-0.01097
	0.308433	-0.00107		0.309467	-0.0459		0.308017	0.003815		0.308333	-0.01067
	0.311767	-0.00161		0.3128	-0.04619		0.31135	0.003695		0.311667	-0.01043
	0.3151	-0.00221		0.316133	-0.04649		0.314683	0.003636		0.315	-0.01031
	0.318433	-0.00268		0.319467	-0.04685		0.318017	0.003636		0.318333	-0.01025
	0.321767	-0.0031		0.3228	-0.04715		0.32135	0.003695		0.321667	-0.01025
	0.3251	-0.00334		0.326133	-0.04739		0.324683	0.003815		0.325	-0.01031
	0.328433	-0.00346		0.329467	-0.04756		0.328017	0.003934		0.328333	-0.01043
	0.331767	-0.00346		0.3328	-0.04774		0.33135	0.004113		0.331667	-0.01061
	0.3351	-0.00334		0.336133	-0.04786		0.334683	0.004292		0.335	-0.01085
	0.338433	-0.0031		0.339467	-0.04792		0.338017	0.004411		0.338333	-0.01115
	0.341767	-0.00286		0.3428	-0.04792		0.34135	0.00453		0.341667	-0.01144
	0.3451	-0.00256		0.346133	-0.04792		0.344683	0.00459		0.345	-0.0118
	0.348433	-0.00238		0.349467	-0.04786		0.348017	0.00459		0.348333	-0.0121
	0.351767	-0.00215		0.3528	-0.04774		0.35135	0.00453		0.351667	-0.0124
	0.3551	-0.00197		0.356133	-0.04756		0.354683	0.004411		0.355	-0.01264
	0.358433	-0.00185		0.359467	-0.04727		0.358017	0.004232		0.358333	-0.01287
	0.361767	-0.00179		0.3628	-0.04691		0.36135	0.004053		0.361667	-0.01305
	0.3651	-0.00173		0.366133	-0.04649		0.364683	0.003874		0.365	-0.01323
	0.368433	-0.00173		0.369467	-0.04601		0.368017	0.003755		0.368333	-0.01335
	0.371767	-0.00173		0.3728	-0.04566		0.37135	0.003695		0.371667	-0.01341
	0.3751	-0.00167		0.376133	-0.04524		0.374683	0.003695		0.375	-0.01347
	0.378433	-0.00167		0.379467	-0.04494		0.378017	0.003755		0.378333	-0.01341
	0.381767	-0.00161		0.3828	-0.04476		0.38135	0.003874		0.381667	-0.01341
	0.3851	-0.00155		0.386133	-0.0447		0.384683	0.004053		0.385	-0.01335
	0.388433	-0.00143		0.389467	-0.04476		0.388017	0.004172		0.388333	-0.01335
	0.391767	-0.00131		0.3928	-0.04494		0.39135	0.004351		0.391667	-0.01329
	0.3951	-0.00119		0.396133	-0.04518		0.394683	0.00447		0.395	-0.01323
	0.398433	-0.00107		0.399467	-0.04548		0.398017	0.00459		0.398333	-0.01323
	0.401767	-0.00101		0.4028	-0.04584		0.40135	0.004709		0.401667	-0.01329
	0.4051	-0.00095		0.406133	-0.04625		0.404683	0.004709		0.405	-0.01335
	0.408433	-0.00095		0.409467	-0.04661		0.408017	0.004709		0.408333	-0.01353
	0.411767	-0.00101		0.4128	-0.04697		0.41135	0.004709		0.411667	-0.01377
	0.4151	-0.00101		0.416133	-0.04733		0.414683	0.004709		0.415	-0.01401
	0.418433	-0.00107		0.419467	-0.04756		0.418017	0.004768		0.418333	-0.01431
	0.421767	-0.00107		0.4228	-0.04774		0.42135	0.004828		0.421667	-0.0146
	0.4251	-0.00113		0.426133	-0.04786		0.424683	0.004888		0.425	-0.01484
	0.428433	-0.00107		0.429467	-0.04786		0.428017	0.005066		0.428333	-0.01508
	0.431767	-0.00107		0.4328	-0.04786		0.43135	0.005305		0.431667	-0.01526
	0.4351	-0.00095		0.436133	-0.04774		0.434683	0.005543		0.435	-0.01538
	0.438433	-0.00089		0.439467	-0.0475		0.438017	0.005901		0.438333	-0.01544
	0.441767	-0.00083		0.4428	-0.04727		0.44135	0.006199		0.441667	-0.01538
	0.4451	-0.00077		0.446133	-0.04697		0.444683	0.006557		0.445	-0.01532
	0.448433	-0.00077		0.449467	-0.04661		0.448017	0.006855		0.448333	-0.0152
	0.451767	-0.00072		0.4528	-0.04625		0.45135	0.007033		0.451667	-0.01508
	0.4551	-0.00066		0.456133	-0.0459		0.454683	0.007212		0.455	-0.01496
	0.458433	-0.0006		0.459467	-0.04548		0.458017	0.007331		0.458333	-0.01484
	0.461767	-0.00048		0.4628	-0.04506		0.46135	0.007391		0.461667	-0.01472
	0.4651	-0.0003		0.466133	-0.0447		0.464683	0.007451		0.465	-0.0146
	0.468433	-6e-05		0.469467	-0.04441		0.468017	0.007391		0.468333	-0.0146
	0.471767	0.000179		0.4728	-0.04423		0.47135	0.007391		0.471667	-0.01466
	0.4751	0.000477		0.476133	-0.04423		0.474683	0.007331		0.475	-0.01478
	0.478433	0.000775		0.479467	-0.04435		0.478017	0.007272		0.478333	-0.01496
	0.481767	0.001073		0.4828	-0.04458		0.48135	0.007153		0.481667	-0.0152
	0.4851	0.001311		0.486133	-0.045		0.484683	0.007033		0.485	-0.01556
	0.488433	0.00149		0.489467	-0.04554		0.488017	0.006855		0.488333	-0.01591
	0.491767	0.001609		0.4928	-0.04607		0.49135	0.006616		0.491667	-0.01627
	0.4951	0.001669		0.496133	-0.04673		0.494683	0.006318		0.495	-0.01657
	0.498433	0.001609		0.499467	-0.04727		0.498017	0.00596		0.498333	-0.01681
	0.501767	0.00149		0.5028	-0.0478		0.50135	0.005603		0.501667	-0.01699
	0.5051	0.001252		0.506133	-0.04822		0.504683	0.005305		0.505	-0.01705
	0.508433	0.001013		0.509467	-0.04852		0.508017	0.005007		0.508333	-0.01699
	0.511767	0.000656		0.5128	-0.0487		0.51135	0.004768		0.511667	-0.01693
	0.5151	0.000358		0.516133	-0.04882		0.514683	0.00459		0.515	-0.01675
	0.518433	0		0.519467	-0.04882		0.518017	0.00453		0.518333	-0.01663
	0.521767	-0.0003		0.5228	-0.04882		0.52135	0.00447		0.521667	-0.01645
	0.5251	-0.00054		0.526133	-0.04882		0.524683	0.00453		0.525	-0.01627
	0.528433	-0.00072		0.529467	-0.04876		0.528017	0.004649		0.528333	-0.01615
	0.531767	-0.00077		0.5328	-0.04864		0.53135	0.004709		0.531667	-0.01609
	0.5351	-0.00077		0.536133	-0.04858		0.534683	0.004828		0.535	-0.01603
	0.538433	-0.00077		0.539467	-0.04852		0.538017	0.004888		0.538333	-0.01597
	0.541767	-0.00077		0.5428	-0.04846		0.54135	0.004947		0.541667	-0.01591
	0.5451	-0.00072		0.546133	-0.0484		0.544683	0.004947		0.545	-0.01591
	0.548433	-0.00077		0.549467	-0.04834		0.548017	0.004888		0.548333	-0.0158
	0.551767	-0.00077		0.5528	-0.04828		0.55135	0.004828		0.551667	-0.01574
	0.5551	-0.00089		0.556133	-0.04816		0.554683	0.004768		0.555	-0.01556
	0.558433	-0.00095		0.559467	-0.04804		0.558017	0.004649		0.558333	-0.01538
	0.561767	-0.00107		0.5628	-0.04792		0.56135	0.00459		0.561667	-0.01508
	0.5651	-0.00113		0.566133	-0.04774		0.564683	0.00447		0.565	-0.01484
	0.568433	-0.00113		0.569467	-0.04756		0.568017	0.004411		0.568333	-0.01448
	0.571767	-0.00101		0.5728	-0.04739		0.57135	0.004411		0.571667	-0.01419
	0.5751	-0.00089		0.576133	-0.04721		0.574683	0.004411		0.575	-0.01389
	0.578433	-0.00072		0.579467	-0.04703		0.578017	0.004411		0.578333	-0.01365
	0.581767	-0.00054		0.5828	-0.04697		0.58135	0.004411		0.581667	-0.01353
	0.5851	-0.0003		0.586133	-0.04697		0.584683	0.00447		0.585	-0.01347
	0.588433	-0.00012		0.589467	-0.04709		0.588017	0.00453		0.588333	-0.01359
	0.591767	5.96e-05		0.5928	-0.04727		0.59135	0.004649		0.591667	-0.01377
	0.5951	0.000119		0.596133	-0.04745		0.594683	0.004768		0.595	-0.01401
	0.598433	0.000179		0.599467	-0.04768		0.598017	0.004888		0.598333	-0.01442
	0.601767	0.000179		0.6028	-0.04786		0.60135	0.005007		0.601667	-0.0149
	0.6051	0.000119		0.606133	-0.04792		0.604683	0.005126		0.605	-0.01544
	0.608433	5.96e-05		0.609467	-0.04792		0.608017	0.005305		0.608333	-0.01609
	0.611767	0		0.6128	-0.0478		0.61135	0.005484		0.611667	-0.01675
	0.6151	0		0.616133	-0.04756		0.614683	0.005722		0.615	-0.0174
	0.618433	-6e-05		0.619467	-0.04727		0.618017	0.00596		0.618333	-0.01806
	0.621767	-0.00012		0.6228	-0.04697		0.62135	0.006199		0.621667	-0.01866
	0.6251	-6e-05		0.626133	-0.04673		0.624683	0.006437		0.625	-0.01913
	0.628433	-6e-05		0.629467	-0.04661		0.628017	0.006616		0.628333	-0.01955
	0.631767	0		0.6328	-0.04655		0.63135	0.006795		0.631667	-0.01979
	0.6351	0.000119		0.636133	-0.04661		0.634683	0.006855		0.635	-0.01985
	0.638433	0.000179		0.639467	-0.04685		0.638017	0.006795		0.638333	-0.01979
	0.641767	0.000238		0.6428	-0.04709		0.64135	0.006676		0.641667	-0.01967
	0.6451	0.000298		0.646133	-0.04745		0.644683	0.006497		0.645	-0.01943
	0.648433	0.000358		0.649467	-0.0478		0.648017	0.006318		0.648333	-0.01913
	0.651767	0.000477		0.6528	-0.0481		0.65135	0.00608		0.651667	-0.01884
	0.6551	0.000536		0.656133	-0.04846		0.654683	0.005901		0.655	-0.01854
	0.658433	0.000596		0.659467	-0.0487		0.658017	0.005722		0.658333	-0.01824
	0.661767	0.000596		0.6628	-0.04894		0.66135	0.005662		0.661667	-0.018
	0.6651	0.000596		0.666133	-0.04917		0.664683	0.005662		0.665	-0.01776
	0.668433	0.000596		0.669467	-0.04929		0.668017	0.005722		0.668333	-0.01752
	0.671767	0.000596		0.6728	-0.04941		0.67135	0.005841		0.671667	-0.01729
	0.6751	0.000596		0.676133	-0.04947		0.674683	0.00596		0.675	-0.01711
	0.678433	0.000536		0.679467	-0.04941		0.678017	0.00608		0.678333	-0.01687
	0.681767	0.000477		0.6828	-0.04923		0.68135	0.006139		0.681667	-0.01669
	0.6851	0.000358		0.686133	-0.049		0.684683	0.006199		0.685	-0.01651
	0.688433	0.000298		0.689467	-0.0487		0.688017	0.006199		0.688333	-0.01639
	0.691767	0.000238		0.6928	-0.04834		0.69135	0.006199		0.691667	-0.01627
	0.6951	0.000179		0.696133	-0.04792		0.694683	0.006199		0.695	-0.01615
	0.698433	0.000179		0.699467	-0.0475		0.698017	0.006139		0.698333	-0.01603
	0.701767	0.000119		0.7028	-0.04721		0.70135	0.006139		0.701667	-0.01597
	0.7051	5.96e-05		0.706133	-0.04697		0.704683	0.00608		0.705	-0.01591
	0.708433	0		0.709467	-0.04679		0.708017	0.00602		0.708333	-0.01585
	0.711767	-6e-05		0.7128	-0.04673		0.71135	0.00596		0.711667	-0.0158
	0.7151	-0.00012		0.716133	-0.04673		0.714683	0.005901		0.715	-0.01574
	0.718433	-0.00024		0.719467	-0.04673		0.718017	0.005782		0.718333	-0.01568
	0.721767	-0.00036		0.7228	-0.04667		0.72135	0.005662		0.721667	-0.01568
	0.7251	-0.00054		0.726133	-0.04655		0.724683	0.005484		0.725	-0.01568
	0.728433	-0.00077		0.729467	-0.04637		0.728017	0.005305		0.728333	-0.01574
	0.731767	-0.00095		0.7328	-0.04613		0.73135	0.005126		0.731667	-0.0158
	0.7351	-0.00107		0.736133	-0.0459		0.734683	0.005007		0.735	-0.01585
	0.738433	-0.00113		0.739467	-0.0456		0.738017	0.004888		0.738333	-0.01603
	0.741767	-0.00119		0.7428	-0.04536		0.74135	0.004888		0.741667	-0.01621
	0.7451	-0.00113		0.746133	-0.04518		0.744683	0.004888		0.745	-0.01639
	0.748433	-0.00095		0.749467	-0.04506		0.748017	0.005007		0.748333	-0.01663
	0.751767	-0.00077		0.7528	-0.045		0.75135	0.005126		0.751667	-0.01687
	0.7551	-0.00048		0.756133	-0.04506		0.754683	0.005305		0.755	-0.01711
	0.758433	-0.00018		0.759467	-0.04512		0.758017	0.005484		0.758333	-0.0174
	0.761767	5.96e-05		0.7628	-0.04524		0.76135	0.005722		0.761667	-0.01764
	0.7651	0.000298		0.766133	-0.04536		0.764683	0.005901		0.765	-0.01788
	0.768433	0.000477		0.769467	-0.04554		0.768017	0.00608		0.768333	-0.01812
	0.771767	0.000596		0.7728	-0.04572		0.77135	0.006258		0.771667	-0.01836
	0.7751	0.000596		0.776133	-0.0459		0.774683	0.006378		0.775	-0.0186
	0.778433	0.000477		0.779467	-0.04619		0.778017	0.006616		0.778333	-0.01878
	0.781767	0.000298		0.7828	-0.04649		0.78135	0.006795		0.781667	-0.01889
	0.7851	5.96e-05		0.786133	-0.04679		0.784683	0.007033		0.785	-0.01895
	0.788433	-0.00024		0.789467	-0.04721		0.788017	0.007272		0.788333	-0.01901
	0.791767	-0.00054		0.7928	-0.04756		0.79135	0.00751		0.791667	-0.01889
	0.7951	-0.00083		0.796133	-0.04798		0.794683	0.007689		0.795	-0.01878
	0.798433	-0.00107		0.799467	-0.04828		0.798017	0.007927		0.798333	-0.01854
	0.801767	-0.00125		0.8028	-0.04858		0.80135	0.008106		0.801667	-0.0183
	0.8051	-0.00131		0.806133	-0.04882		0.804683	0.008225		0.805	-0.018
	0.808433	-0.00131		0.809467	-0.04894		0.808017	0.008285		0.808333	-0.01776
	0.811767	-0.00119		0.8128	-0.04905		0.81135	0.008225		0.811667	-0.01746
	0.8151	-0.00113		0.816133	-0.04917		0.814683	0.008166		0.815	-0.01729
	0.818433	-0.00095		0.819467	-0.04929		0.818017	0.008106		0.818333	-0.01711
	0.821767	-0.00083		0.8228	-0.04941		0.82135	0.007987		0.821667	-0.01699
	0.8251	-0.00072		0.826133	-0.04953		0.824683	0.007927		0.825	-0.01687
	0.828433	-0.00072		0.829467	-0.04971		0.828017	0.007808		0.828333	-0.01681
	0.831767	-0.00077		0.8328	-0.04989		0.83135	0.007808		0.831667	-0.01681
	0.8351	-0.00089		0.836133	-0.05007		0.834683	0.007808		0.835	-0.01681
	0.838433	-0.00107		0.839467	-0.05019		0.838017	0.007868		0.838333	-0.01687
	0.841767	-0.00137		0.8428	-0.05025		0.84135	0.007987		0.841667	-0.01699
	0.8451	-0.00167		0.846133	-0.05031		0.844683	0.008106		0.845	-0.01711
	0.848433	-0.00197		0.849467	-0.05025		0.848017	0.008285		0.848333	-0.01734
	0.851767	-0.00226		0.8528	-0.05019		0.85135	0.008404		0.851667	-0.01758
	0.8551	-0.00256		0.856133	-0.05007		0.854683	0.008464		0.855	-0.01782
	0.858433	-0.0028		0.859467	-0.04989		0.858017	0.008523		0.858333	-0.01812
	0.861767	-0.00298		0.8628	-0.04971		0.86135	0.008523		0.861667	-0.0183
	0.8651	-0.00304		0.866133	-0.04959		0.864683	0.008523		0.865	-0.01842
	0.868433	-0.00304		0.869467	-0.04947		0.868017	0.008464		0.868333	-0.01848
	0.871767	-0.00292		0.8728	-0.04941		0.87135	0.008404		0.871667	-0.01836
	0.8751	-0.00268		0.876133	-0.04929		0.874683	0.008345		0.875	-0.01812
	0.878433	-0.00244		0.879467	-0.04929		0.878017	0.008285		0.878333	-0.01782
	0.881767	-0.00209		0.8828	-0.04923		0.88135	0.008225		0.881667	-0.01746
	0.8851	-0.00167		0.886133	-0.04929		0.884683	0.008225		0.885	-0.01711
	0.888433	-0.00119		0.889467	-0.04929		0.888017	0.008285		0.888333	-0.01681
	0.891767	-0.00077		0.8928	-0.04929		0.89135	0.008285		0.891667	-0.01657
	0.8951	-0.00042		0.896133	-0.04923		0.894683	0.008345		0.895	-0.01651
	0.898433	-0.00012		0.899467	-0.04917		0.898017	0.008464		0.898333	-0.01657
	0.901767	0.000119		0.9028	-0.049		0.90135	0.008523		0.901667	-0.01675
	0.9051	0.000298		0.906133	-0.04876		0.904683	0.008643		0.905	-0.01699
	0.908433	0.000358		0.909467	-0.04852		0.908017	0.008762		0.908333	-0.01734
	0.911767	0.000417		0.9128	-0.04822		0.91135	0.008941		0.911667	-0.01764
	0.9151	0.000477		0.916133	-0.04786		0.914683	0.00912		0.915	-0.01794
	0.918433	0.000477		0.919467	-0.04756		0.918017	0.009239		0.918333	-0.01812
	0.921767	0.000536		0.9228	-0.04727		0.92135	0.009298		0.921667	-0.01812
	0.9251	0.000596		0.926133	-0.04703		0.924683	0.009358		0.925	-0.018
	0.928433	0.000715		0.929467	-0.04685		0.928017	0.009358		0.928333	-0.0177
	0.931767	0.000894		0.9328	-0.04673		0.93135	0.009298		0.931667	-0.01723
	0.9351	0.001132		0.936133	-0.04661		0.934683	0.009239		0.935	-0.01669
	0.938433	0.001371		0.939467	-0.04649		0.938017	0.00912		0.938333	-0.01609
	0.941767	0.001609		0.9428	-0.04631		0.94135	0.009		0.941667	-0.0155
	0.9451	0.001848		0.946133	-0.04607		0.944683	0.008881		0.945	-0.0149
	0.948433	0.002146		0.949467	-0.04578		0.948017	0.008702		0.948333	-0.01431
	0.951767	0.002503		0.9528	-0.04536		0.95135	0.008523		0.951667	-0.01377
	0.9551	0.002921		0.956133	-0.04488		0.954683	0.008345		0.955	-0.01329
	0.958433	0.003457		0.959467	-0.04429		0.958017	0.008225		0.958333	-0.01281
	0.961767	0.004172		0.9628	-0.04375		0.96135	0.008106		0.961667	-0.01234
	0.9651	0.004947		0.966133	-0.04315		0.964683	0.008106		0.965	-0.0118
	0.968433	0.005901		0.969467	-0.04262		0.968017	0.008106		0.968333	-0.01121
	0.971767	0.006974		0.9728	-0.04214		0.97135	0.008225		0.971667	-0.01061
	0.9751	0.008106		0.976133	-0.04166		0.974683	0.008464		0.975	-0.00995
	0.978433	0.009239		0.979467	-0.04113		0.978017	0.008821		0.978333	-0.0093
	0.981767	0.010371		0.9828	-0.04065		0.98135	0.009298		0.981667	-0.00864
	0.9851	0.011504		0.986133	-0.04005		0.984683	0.009894		0.985	-0.00793
	0.988433	0.012517		0.989467	-0.03946		0.988017	0.01061		0.988333	-0.00727
	0.991767	0.013471		0.9928	-0.03874		0.99135	0.011325		0.991667	-0.00662
	0.9951	0.014424		0.996133	-0.03791		0.994683	0.0121		0.995	-0.0059
	0.998433	0.015318		0.999467	-0.03701		0.998017	0.012815		0.998333	-0.00525
	1.00177	0.016212		1.0028	-0.036		1.00135	0.01353		1.00167	-0.00459
	1.0051	0.017226		1.00613	-0.03499		1.00468	0.014126		1.005	-0.00399
	1.00843	0.018239		1.00947	-0.03392		1.00802	0.014722		1.00833	-0.00334
	1.01177	0.019431		1.0128	-0.03284		1.01135	0.015199		1.01167	-0.00268
	1.0151	0.020683		1.01613	-0.03177		1.01468	0.015616		1.015	-0.00197
	1.01843	0.022113		1.01947	-0.03064		1.01802	0.015974		1.01833	-0.00119
	1.02177	0.023663		1.0228	-0.02944		1.02135	0.016272		1.02167	-0.0003
	1.0251	0.025451		1.02613	-0.02819		1.02468	0.01657		1.025	0.000775
	1.02843	0.027418		1.02947	-0.02682		1.02802	0.016868		1.02833	0.002086
	1.03177	0.029683		1.0328	-0.02539		1.03135	0.017166		1.03167	0.003695
	1.0351	0.032246		1.03613	-0.02384		1.03468	0.017524		1.035	0.005603
	1.03843	0.035226		1.03947	-0.02205		1.03802	0.017941		1.03833	0.007868
	1.04177	0.038624		1.0428	-0.02021		1.04135	0.018477		1.04167	0.010431
	1.0451	0.042498		1.04613	-0.01812		1.04468	0.019073		1.045	0.013411
	1.04843	0.04673		1.04947	-0.01591		1.04802	0.019848		1.04833	0.016689
	1.05177	0.05132		1.0528	-0.01359		1.05135	0.020683		1.05167	0.020325
	1.0551	0.056267		1.05613	-0.01109		1.05468	0.021636		1.055	0.024378
	1.05843	0.061393		1.05947	-0.00852		1.05802	0.022769		1.05833	0.028729
	1.06177	0.066578		1.0628	-0.00578		1.06135	0.023961		1.06167	0.033557
	1.0651	0.071704		1.06613	-0.0031		1.06468	0.025213		1.065	0.038743
	1.06843	0.076652		1.06947	-0.00036		1.06802	0.026584		1.06833	0.044346
	1.07177	0.081241		1.0728	0.002205		1.07135	0.028014		1.07167	0.050306
	1.0751	0.085354		1.07613	0.004649		1.07468	0.029445		1.075	0.056565
	1.07843	0.08893		1.07947	0.006914		1.07802	0.030816		1.07833	0.063002
	1.08177	0.091851		1.0828	0.008941		1.08135	0.032127		1.08167	0.069618
	1.0851	0.094056		1.08613	0.010729		1.08468	0.033319		1.085	0.076175
	1.08843	0.095487		1.08947	0.012279		1.08802	0.034451		1.08833	0.082672
	1.09177	0.096202		1.0928	0.01353		1.09135	0.035405		1.09167	0.088811
	1.0951	0.096262		1.09613	0.014663		1.09468	0.03618		1.095	0.094593
	1.09843	0.095665		1.09947	0.015616		1.09802	0.036776		1.09833	0.099897
	1.10177	0.094473		1.1028	0.016451		1.10135	0.037253		1.10167	0.104606
	1.1051	0.092924		1.10613	0.017166		1.10468	0.037551		1.105	0.108719
	1.10843	0.091016		1.10947	0.017881		1.10802	0.037789		1.10833	0.112116
	1.11177	0.08893		1.1128	0.018477		1.11135	0.037909		1.11167	0.114858
	1.1151	0.086784		1.11613	0.019073		1.11468	0.037909		1.115	0.117004
	1.11843	0.084698		1.11947	0.01955		1.11802	0.037789		1.11833	0.118554
	1.12177	0.082672		1.1228	0.020027		1.12135	0.037551		1.12167	0.119627
	1.1251	0.080884		1.12613	0.020504		1.12468	0.037253		1.125	0.120282
	1.12843	0.079274		1.12947	0.020921		1.12802	0.036836		1.12833	0.120699
	1.13177	0.077903		1.1328	0.021398		1.13135	0.036418		1.13167	0.120878
	1.1351	0.076771		1.13613	0.021935		1.13468	0.035942		1.135	0.120997
	1.13843	0.075877		1.13947	0.022709		1.13802	0.035524		1.13833	0.121117
	1.14177	0.075281		1.1428	0.023782		1.14135	0.035107		1.14167	0.121355
	1.1451	0.074863		1.14613	0.025392		1.14468	0.034869		1.145	0.121713
	1.14843	0.074744		1.14947	0.027776		1.14802	0.034809		1.14833	0.122368
	1.15177	0.074923		1.1528	0.031054		1.15135	0.035048		1.15167	0.123322
	1.1551	0.075579		1.15613	0.035644		1.15468	0.035524		1.155	0.124693
	1.15843	0.076652		1.15947	0.041723		1.15802	0.036418		1.15833	0.126541
	1.16177	0.078261		1.1628	0.049591		1.16135	0.03773		1.16167	0.128865
	1.1651	0.080526		1.16613	0.059605		1.16468	0.039518		1.165	0.131786
	1.16843	0.083566		1.16947	0.071943		1.16802	0.041842		1.16833	0.135303
	1.17177	0.08738		1.1728	0.086784		1.17135	0.044763		1.17167	0.139475
	1.1751	0.092149		1.17613	0.104368		1.17468	0.048399		1.175	0.144303
	1.17843	0.09793		1.17947	0.124633		1.17802	0.05281		1.17833	0.149846
	1.18177	0.104666		1.1828	0.147462		1.18135	0.057995		1.18167	0.156105
	1.1851	0.112414		1.18613	0.172734		1.18468	0.064015		1.185	0.162959
	1.18843	0.121117		1.18947	0.200033		1.18802	0.07093		1.18833	0.170469
	1.19177	0.130713		1.1928	0.228941		1.19135	0.078678		1.19167	0.178635
	1.1951	0.141084		1.19613	0.258863		1.19468	0.087321		1.195	0.187337
	1.19843	0.152051		1.19947	0.289142		1.19802	0.096798		1.19833	0.196576
	1.20177	0.163436		1.2028	0.319123		1.20135	0.10705		1.20167	0.206351
	1.2051	0.175059		1.20613	0.348091		1.20468	0.118017		1.205	0.216484
	1.20843	0.186801		1.20947	0.37533		1.20802	0.12964		1.20833	0.227034
	1.21177	0.198483		1.2128	0.400364		1.21135	0.141799		1.21167	0.237823
	1.2151	0.210047		1.21613	0.422776		1.21468	0.154555		1.215	0.248849
	1.21843	0.221372		1.21947	0.442266		1.21802	0.167727		1.21833	0.260055
	1.22177	0.232577		1.2228	0.458658		1.22135	0.181377		1.22167	0.27132
	1.2251	0.243604		1.22613	0.472128		1.22468	0.195444		1.225	0.282645
	1.22843	0.254691		1.22947	0.482857		1.22802	0.209928		1.22833	0.29397
	1.23177	0.266016		1.2328	0.491202		1.23135	0.224769		1.23167	0.305295
	1.2351	0.277877		1.23613	0.497818		1.23468	0.240028		1.235	0.316799
	1.23843	0.290573		1.23947	0.503361		1.23802	0.255883		1.23833	0.328481
	1.24177	0.304461		1.2428	0.508606		1.24135	0.272453		1.24167	0.340581
	1.2451	0.319898		1.24613	0.514567		1.24468	0.289857		1.245	0.353277
	1.24843	0.337243		1.24947	0.521958		1.24802	0.308394		1.24833	0.366926
	1.25177	0.356615		1.2528	0.531733		1.25135	0.328243		1.25167	0.381708
	1.2551	0.378072		1.25613	0.544369		1.25468	0.349641		1.255	0.397742
	1.25843	0.401378		1.25947	0.560105		1.25802	0.372469		1.25833	0.415087
	1.26177	0.425756		1.2628	0.578821		1.26135	0.39649		1.26167	0.433385
	1.2651	0.450253		1.26613	0.599682		1.26468	0.421107		1.265	0.452161
	1.26843	0.47344		1.26947	0.621498		1.26802	0.445485		1.26833	0.470459
	1.27177	0.493705		1.2728	0.642419		1.27135	0.468194		1.27167	0.48703
	1.2751	0.509083		1.27613	0.660419		1.27468	0.487745		1.275	0.5005
	1.27843	0.517845		1.27947	0.673294		1.27802	0.502467		1.27833	0.509381
	1.28177	0.518441		1.2828	0.679016		1.28135	0.510693		1.28167	0.512302
	1.2851	0.509918		1.28613	0.676274		1.28468	0.511169		1.285	0.50813
	1.28843	0.491858		1.28947	0.664175		1.28802	0.502944		1.28833	0.496328
	1.29177	0.464797		1.2928	0.643015		1.29135	0.485897		1.29167	0.476897
	1.2951	0.429809		1.29613	0.613868		1.29468	0.460505		1.295	0.450552
	1.29843	0.388801		1.29947	0.578701		1.29802	0.428081		1.29833	0.418663
	1.30177	0.344038		1.3028	0.540316		1.30135	0.390351		1.30167	0.383019
	1.3051	0.298083		1.30613	0.501633		1.30468	0.3497		1.305	0.345588
	1.30843	0.253379		1.30947	0.46581		1.30802	0.308394		1.30833	0.308692
	1.31177	0.212193		1.3128	0.435531		1.31135	0.268936		1.31167	0.274241
	1.3151	0.17637		1.31613	0.412941		1.31468	0.233293		1.315	0.243962
	1.31843	0.146985		1.31947	0.39953		1.31802	0.203013		1.31833	0.218987
	1.32177	0.124753		1.3228	0.395834		1.32135	0.179112		1.32167	0.199974
	1.3251	0.109613		1.32613	0.401855		1.32468	0.162065		1.325	0.187039
	1.32843	0.101209		1.32947	0.416756		1.32802	0.151753		1.32833	0.180006
	1.33177	0.098646		1.3328	0.439465		1.33135	0.147581		1.33167	0.178277
	1.3351	0.101089		1.33613	0.468493		1.33468	0.148892		1.335	0.181019
	1.33843	0.107408		1.33947	0.502348		1.33802	0.154793		1.33833	0.187576
	1.34177	0.116467		1.3428	0.539601		1.34135	0.164211		1.34167	0.197172
	1.3451	0.127375		1.34613	0.579		1.34468	0.17643		1.345	0.209093
	1.34843	0.139296		1.34947	0.619471		1.34802	0.190496		1.34833	0.222802
	1.35177	0.151575		1.3528	0.660062		1.35135	0.205755		1.35167	0.237942
	1.3551	0.163734		1.35613	0.700235		1.35468	0.221729		1.355	0.254095
	1.35843	0.175416		1.35947	0.739396		1.35802	0.237882		1.35833	0.271082
	1.36177	0.186384		1.3628	0.777125		1.36135	0.253856		1.36167	0.288606
	1.3651	0.196576		1.36613	0.813186		1.36468	0.269413		1.365	0.306427
	1.36843	0.206053		1.36947	0.84728		1.36802	0.284195		1.36833	0.324309
	1.37177	0.214875		1.3728	0.879288		1.37135	0.298083		1.37167	0.342071
	1.3751	0.223219		1.37613	0.90909		1.37468	0.310898		1.375	0.359476
	1.37843	0.231147		1.37947	0.936568		1.37802	0.32258		1.37833	0.376284
	1.38177	0.238895		1.3828	0.961542		1.38135	0.33313		1.38167	0.392258
	1.3851	0.246406		1.38613	0.984073		1.38468	0.342607		1.385	0.407279
	1.38843	0.253856		1.38947	1.00404		1.38802	0.350893		1.38833	0.421226
	1.39177	0.261247		1.3928	1.02144		1.39135	0.358224		1.39167	0.433981
	1.3951	0.268459		1.39613	1.03635		1.39468	0.364542		1.395	0.445426
	1.39843	0.275493		1.39947	1.04862		1.39802	0.370026		1.39833	0.455618
	1.40177	0.282168		1.4028	1.05852		1.40135	0.374734		1.40167	0.464439
	1.4051	0.288546		1.40613	1.06603		1.40468	0.378847		1.405	0.472069
	1.40843	0.294447		1.40947	1.07139		1.40802	0.382423		1.40833	0.478566
	1.41177	0.299811		1.4128	1.07467		1.41135	0.385582		1.41167	0.48399
	1.4151	0.304699		1.41613	1.07616		1.41468	0.388443		1.415	0.48846
	1.41843	0.30899		1.41947	1.07604		1.41802	0.391126		1.41833	0.492215
	1.42177	0.312805		1.4228	1.07461		1.42135	0.393689		1.42167	0.495315
	1.4251	0.316143		1.42613	1.07211		1.42468	0.396192		1.425	0.497937
	1.42843	0.319004		1.42947	1.06889		1.42802	0.398695		1.42833	0.500202
	1.43177	0.321567		1.4328	1.06525		1.43135	0.401199		1.43167	0.502348
	1.4351	0.323892		1.43613	1.0615		1.43468	0.403821		1.435	0.504494
	1.43843	0.326037		1.43947	1.05786		1.43802	0.406444		1.43833	0.506699
	1.44177	0.328124		1.4428	1.05465		1.44135	0.409126		1.44167	0.509083
	1.4451	0.33015		1.44613	1.05202		1.44468	0.411868		1.445	0.511706
	1.44843	0.332296		1.44947	1.05017		1.44802	0.41467		1.44833	0.514627
	1.45177	0.334501		1.4528	1.04916		1.45135	0.41759		1.45167	0.517845
	1.4551	0.336945		1.45613	1.0491		1.45468	0.42057		1.455	0.521362
	1.45843	0.339508		1.45947	1.04988		1.45802	0.42367		1.45833	0.525177
	1.46177	0.342309		1.4628	1.05143		1.46135	0.426829		1.46167	0.52923
	1.4651	0.345349		1.46613	1.05357		1.46468	0.429988		1.465	0.533402
	1.46843	0.348508		1.46947	1.05625		1.46802	0.433207		1.46833	0.537694
	1.47177	0.351906		1.4728	1.05917		1.47135	0.436366		1.47167	0.541985
	1.4751	0.355422		1.47613	1.06233		1.47468	0.439525		1.475	0.546277
	1.47843	0.359178		1.47947	1.06543		1.47802	0.442624		1.47833	0.550508
	1.48177	0.363052		1.4828	1.06841		1.48135	0.445604		1.48167	0.554681
	1.4851	0.367045		1.48613	1.07116		1.48468	0.448525		1.485	0.558674
	1.48843	0.371158		1.48947	1.0736		1.48802	0.451446		1.48833	0.562608
	1.49177	0.37545		1.4928	1.0758		1.49135	0.454307		1.49167	0.566363
	1.4951	0.379801		1.49613	1.07765		1.49468	0.457227		1.495	0.570059
	1.49843	0.384331		1.49947	1.0792		1.49802	0.460148		1.49833	0.573575
	1.50177	0.388861		1.5028	1.08057		1.50135	0.463068		1.50167	0.577033
	1.5051	0.39351		1.50613	1.0817		1.50468	0.465989		1.505	0.58037
	1.50843	0.39804		1.50947	1.08284		1.50802	0.468791		1.50833	0.583708
	1.51177	0.40257		1.5128	1.08397		1.51135	0.471473		1.51167	0.586927
	1.5151	0.406921		1.51613	1.08522		1.51468	0.474155		1.515	0.590026
	1.51843	0.411034		1.51947	1.08683		1.51802	0.476658		1.51833	0.592887
	1.52177	0.414908		1.5228	1.08886		1.52135	0.479102		1.52167	0.59551
	1.5251	0.418425		1.52613	1.09136		1.52468	0.481427		1.525	0.597835
	1.52843	0.421643		1.52947	1.09446		1.52802	0.483692		1.52833	0.599682
	1.53177	0.424504		1.5328	1.09804		1.53135	0.485897		1.53167	0.601053
	1.5351	0.427008		1.53613	1.10209		1.53468	0.487983		1.535	0.601888
	1.53843	0.429213		1.53947	1.1065		1.53802	0.49001		1.53833	0.602186
	1.54177	0.43118		1.5428	1.11103		1.54135	0.491738		1.54167	0.602007
	1.5451	0.432968		1.54613	1.11544		1.54468	0.493228		1.545	0.60147
	1.54843	0.434577		1.54947	1.11967		1.54802	0.494242		1.54833	0.600696
	1.55177	0.436127		1.5528	1.12337		1.55135	0.494719		1.55167	0.60004
	1.5551	0.437677		1.55613	1.12647		1.55468	0.49448		1.555	0.599623
	1.55843	0.439167		1.55947	1.12873		1.55802	0.493586		1.55833	0.599921
	1.56177	0.440717		1.5628	1.13004		1.56135	0.491858		1.56167	0.601053
	1.5651	0.442266		1.56613	1.13034		1.56468	0.489414		1.565	0.603378
	1.56843	0.443697		1.56947	1.12945		1.56802	0.486255		1.56833	0.607133
	1.57177	0.445068		1.5728	1.12736		1.57135	0.48238		1.57167	0.612378
	1.5751	0.446141		1.57613	1.1239		1.57468	0.47797		1.575	0.619292
	1.57843	0.446856		1.57947	1.11902		1.57802	0.473022		1.57833	0.627816
	1.58177	0.447154		1.5828	1.11258		1.58135	0.467658		1.58167	0.63771
	1.5851	0.446796		1.58613	1.10453		1.58468	0.461936		1.585	0.648797
	1.58843	0.445664		1.58947	1.09488		1.58802	0.455916		1.58833	0.660658
	1.59177	0.443697		1.5928	1.08361		1.59135	0.449479		1.59167	0.672758
	1.5951	0.440776		1.59613	1.07068		1.59468	0.442684		1.595	0.684679
	1.59843	0.436842		1.59947	1.05637		1.59802	0.435472		1.59833	0.695825
	1.60177	0.431776		1.6028	1.04088		1.60135	0.427783		1.60167	0.70554
	1.6051	0.425696		1.60613	1.02442		1.60468	0.419557		1.605	0.713348
	1.60843	0.418544		1.60947	1.00756		1.60802	0.410855		1.60833	0.718832
	1.61177	0.410318		1.6128	0.990748		1.61135	0.401556		1.61167	0.721574
	1.6151	0.401199		1.61613	0.974774		1.61468	0.391781		1.615	0.721335
	1.61843	0.391185		1.61947	0.960588		1.61802	0.381589		1.61833	0.718117
	1.62177	0.380397		1.6228	0.949264		1.62135	0.370979		1.62167	0.711858
	1.6251	0.369072		1.62613	0.94223		1.62468	0.360072		1.625	0.702739
	1.62843	0.35727		1.62947	0.941277		1.62802	0.348926		1.62833	0.691056
	1.63177	0.34523		1.6328	0.948429		1.63135	0.337601		1.63167	0.677168
	1.6351	0.333071		1.63613	0.965893		1.63468	0.326216		1.635	0.661433
	1.63843	0.320971		1.63947	0.996232		1.63802	0.314772		1.63833	0.644267
	1.64177	0.30899		1.6428	1.04207		1.64135	0.303268		1.64167	0.626087
	1.6451	0.297248		1.64613	1.10602		1.64468	0.291824		1.645	0.607252
	1.64843	0.285804		1.64947	1.19054		1.64802	0.280499		1.64833	0.588119
	1.65177	0.274718		1.6528	1.29759		1.65135	0.269353		1.65167	0.568926
	1.6551	0.263989		1.65613	1.42849		1.65468	0.258327		1.655	0.549912
	1.65843	0.253737		1.65947	1.58381		1.65802	0.247538		1.65833	0.531375
	1.66177	0.243902		1.6628	1.76293		1.66135	0.237107		1.66167	0.513375
	1.6651	0.234604		1.66613	1.96409		1.66468	0.227034		1.665	0.49603
	1.66843	0.225723		1.66947	2.18433		1.66802	0.217438		1.66833	0.479519
	1.67177	0.217438		1.6728	2.41953		1.67135	0.208437		1.67167	0.463963
	1.6751	0.209689		1.67613	2.66451		1.67468	0.200093		1.675	0.4493
	1.67843	0.202537		1.67947	2.91336		1.67802	0.192523		1.67833	0.43577
	1.68177	0.196159		1.6828	3.1597		1.68135	0.185788		1.68167	0.423312
	1.6851	0.190556		1.68613	3.39729		1.68468	0.179946		1.685	0.411987
	1.68843	0.185907		1.68947	3.62003		1.68802	0.175178		1.68833	0.401974
	1.69177	0.18239		1.6928	3.82292		1.69135	0.171542		1.69167	0.393152
	1.6951	0.180185		1.69613	4.00192		1.69468	0.169039		1.695	0.385702
	1.69843	0.179589		1.69947	4.15438		1.69802	0.167787		1.69833	0.379682
	1.70177	0.180781		1.7028	4.27914		1.70135	0.167787		1.70167	0.375032
	1.7051	0.184		1.70613	4.37647		1.70468	0.169218		1.705	0.371993
	1.70843	0.189483		1.70947	4.44812		1.70802	0.172079		1.70833	0.370562
	1.71177	0.197411		1.7128	4.49687		1.71135	0.17637		1.71167	0.370979
	1.7151	0.207782		1.71613	4.52626		1.71468	0.182271		1.715	0.373363
	1.71843	0.220656		1.71947	4.54032		1.71802	0.189662		1.71833	0.377774
	1.72177	0.235796		1.7228	4.54313		1.72135	0.198603		1.72167	0.38451
	1.7251	0.253022		1.72613	4.53836		1.72468	0.208974		1.725	0.393569
	1.72843	0.271976		1.72947	4.52924		1.72802	0.220656		1.72833	0.405073
	1.73177	0.292122		1.7328	4.51821		1.73135	0.233471		1.73167	0.419021
	1.7351	0.312924		1.73613	4.50671		1.73468	0.247121		1.735	0.435293
	1.73843	0.333846		1.73947	4.49532		1.73802	0.261247		1.73833	0.453711
	1.74177	0.354171		1.7428	4.48382		1.74135	0.275552		1.74167	0.473797
	1.7451	0.373304		1.74613	4.47112		1.74468	0.289559		1.745	0.495195
	1.74843	0.390708		1.74947	4.45586		1.74802	0.30297		1.74833	0.517249
	1.75177	0.405908		1.7528	4.43631		1.75135	0.315309		1.75167	0.539303
	1.7551	0.418603		1.75613	4.41062		1.75468	0.326395		1.755	0.560641
	1.75843	0.428438		1.75947	4.37719		1.75802	0.335813		1.75833	0.580609
	1.76177	0.435412		1.7628	4.33469		1.76135	0.343561		1.76167	0.59849
	1.7651	0.439405		1.76613	4.2823		1.76468	0.349402		1.765	0.613689
	1.76843	0.440598		1.76947	4.21959		1.76802	0.353396		1.76833	0.625849
	1.77177	0.439167		1.7728	4.14675		1.77135	0.355601		1.77167	0.63473
	1.7751	0.435352		1.77613	4.06432		1.77468	0.356019		1.775	0.640154
	1.77843	0.429451		1.77947	3.97325		1.77802	0.354886		1.77833	0.64218
	1.78177	0.421762		1.7828	3.87472		1.78135	0.352383		1.78167	0.640988
	1.7851	0.412643		1.78613	3.77017		1.78468	0.348568		1.785	0.636816
	1.78843	0.402331		1.78947	3.66098		1.78802	0.34374		1.78833	0.630021
	1.79177	0.391304		1.7928	3.54868		1.79135	0.338018		1.79167	0.620902
	1.7951	0.379741		1.79613	3.4346		1.79468	0.33164		1.795	0.609994
	1.79843	0.36788		1.79947	3.31998		1.79802	0.324726		1.79833	0.597596
	1.80177	0.356019		1.8028	3.20584		1.80135	0.317454		1.80167	0.584126
	1.8051	0.344276		1.80613	3.09306		1.80468	0.310004		1.805	0.56988
	1.80843	0.332892		1.80947	2.98244		1.80802	0.302553		1.80833	0.555217
	1.81177	0.321984		1.8128	2.87443		1.81135	0.295103		1.81167	0.540435
	1.8151	0.311494		1.81613	2.76959		1.81468	0.287831		1.815	0.525713
	1.81843	0.3016		1.81947	2.66814		1.81802	0.280797		1.81833	0.511229
	1.82177	0.292301		1.8228	2.57021		1.82135	0.273943		1.82167	0.497162
	1.8251	0.283539		1.82613	2.47598		1.82468	0.267446		1.825	0.483632
	1.82843	0.275373		1.82947	2.38544		1.82802	0.261128		1.82833	0.470579
	1.83177	0.267684		1.8328	2.29847		1.83135	0.255108		1.83167	0.458121
	1.8351	0.260532		1.83613	2.21503		1.83468	0.249267		1.835	0.446141
	1.83843	0.253797		1.83947	2.13498		1.83802	0.243664		1.83833	0.434697
	1.84177	0.247478		1.8428	2.05821		1.84135	0.238359		1.84167	0.423729
	1.8451	0.241578		1.84613	1.98454		1.84468	0.233233		1.845	0.413179
	1.84843	0.236034		1.84947	1.91373		1.84802	0.228405		1.84833	0.402987
	1.85177	0.230849		1.8528	1.84572		1.85135	0.223875		1.85167	0.393093
	1.8551	0.225961		1.85613	1.78039		1.85468	0.219643		1.855	0.383556
	1.85843	0.221372		1.85947	1.71757		1.85802	0.21565		1.85833	0.374198
	1.86177	0.21708		1.8628	1.65725		1.86135	0.211895		1.86167	0.365138
	1.8651	0.213087		1.86613	1.59937		1.86468	0.208318		1.865	0.356197
	1.86843	0.209332		1.86947	1.54376		1.86802	0.204921		1.86833	0.347495
	1.87177	0.205755		1.8728	1.49036		1.87135	0.201583		1.87167	0.338912
	1.8751	0.202298		1.87613	1.4391		1.87468	0.198305		1.875	0.330508
	1.87843	0.19896		1.87947	1.38992		1.87802	0.195086		1.87833	0.322342
	1.88177	0.195622		1.8828	1.34277		1.88135	0.191867		1.88167	0.314295
	1.8851	0.192285		1.88613	1.29753		1.88468	0.188649		1.885	0.306427
	1.88843	0.188887		1.88947	1.25414		1.88802	0.18543		1.88833	0.298798
	1.89177	0.18537		1.8928	1.21242		1.89135	0.182152		1.89167	0.291407
	1.8951	0.181854		1.89613	1.17236		1.89468	0.178933		1.895	0.284195
	1.89843	0.178218		1.89947	1.13392		1.89802	0.175655		1.89833	0.277221
	1.90177	0.174642		1.9028	1.09702		1.90135	0.172436		1.90167	0.270426
	1.9051	0.171125		1.90613	1.06156		1.90468	0.169218		1.905	0.26387
	1.90843	0.167608		1.90947	1.02752		1.90802	0.165999		1.90833	0.257552
	1.91177	0.16427		1.9128	0.994742		1.91135	0.16284		1.91167	0.251353
	1.9151	0.160992		1.91613	0.963271		1.91468	0.15974		1.915	0.245333
	1.91843	0.157893		1.91947	0.933051		1.91802	0.156641		1.91833	0.239432
	1.92177	0.154912		1.9228	0.903964		1.92135	0.153661		1.92167	0.233769
	1.9251	0.152111		1.92613	0.876009		1.92468	0.150681		1.925	0.228226
	1.92843	0.149369		1.92947	0.849128		1.92802	0.14782		1.92833	0.222921
	1.93177	0.146747		1.9328	0.823259		1.93135	0.145078		1.93167	0.217795
	1.9351	0.144243		1.93613	0.798464		1.93468	0.142395		1.935	0.212908
	1.93843	0.14174		1.93947	0.774503		1.93802	0.139832		1.93833	0.208199
	1.94177	0.139296		1.9428	0.751555		1.94135	0.137448		1.94167	0.203729
	1.9451	0.136971		1.94613	0.729442		1.94468	0.135124		1.945	0.199437
	1.94843	0.134587		1.94947	0.708222		1.94802	0.132918		1.94833	0.195384
	1.95177	0.132322		1.9528	0.687838		1.95135	0.130832		1.95167	0.19145
	1.9551	0.130057		1.95613	0.668228		1.95468	0.128806		1.955	0.187635
	1.95843	0.127792		1.95947	0.649452		1.95802	0.126839		1.95833	0.184
	1.96177	0.125647		1.9628	0.631452		1.96135	0.124991		1.96167	0.180364
	1.9651	0.123501		1.96613	0.614226		1.96468	0.123203		1.965	0.176847
	1.96843	0.121474		1.96947	0.597894		1.96802	0.121474		1.96833	0.17339
	1.97177	0.119507		1.9728	0.582337		1.97135	0.119805		1.97167	0.170052
	1.9751	0.11754		1.97613	0.567555		1.97468	0.118196		1.975	0.166774
	1.97843	0.115693		1.97947	0.553489		1.97802	0.116646		1.97833	0.163674
	1.98177	0.113845		1.9828	0.540197		1.98135	0.115156		1.98167	0.160694
	1.9851	0.112057		1.98613	0.527561		1.98468	0.113666		1.985	0.157952
	1.98843	0.110328		1.98947	0.515521		1.98802	0.112176		1.98833	0.155449
	1.99177	0.108659		1.9928	0.504017		1.99135	0.110686		1.99167	0.153124
	1.9951	0.10699		1.99613	0.49299		1.99468	0.109255		1.995	0.151038
	1.99843	0.105381		1.99947	0.482321		1.99802	0.107765		1.99833	0.14919
	2.00177	0.103891		2.0028	0.472069		2.00135	0.106394		2.00167	0.147462
	2.0051	0.102401		2.00613	0.462174		2.00468	0.104964		2.005	0.145853
	2.00843	0.101089		2.00947	0.452578		2.00802	0.103712		2.00833	0.144303
	2.01177	0.099897		2.0128	0.443339		2.01135	0.10246		2.01167	0.142753
	2.0151	0.098884		2.01613	0.434518		2.01468	0.101268		2.015	0.141263
	2.01843	0.09799		2.01947	0.426054		2.01802	0.100195		2.01833	0.139713
	2.02177	0.097215		2.0228	0.418007		2.02135	0.099063		2.02167	0.138164
	2.0251	0.096679		2.02613	0.410318		2.02468	0.09799		2.025	0.136614
	2.02843	0.096262		2.02947	0.403106		2.02802	0.096917		2.02833	0.135064
	2.03177	0.095963		2.0328	0.396311		2.03135	0.095785		2.03167	0.133514
	2.0351	0.095785		2.03613	0.389874		2.03468	0.094593		2.035	0.132084
	2.03843	0.095665		2.03947	0.383794		2.03802	0.093341		2.03833	0.130713
	2.04177	0.095487		2.0428	0.378132		2.04135	0.09203		2.04167	0.129402
	2.0451	0.095248		2.04613	0.372827		2.04468	0.090778		2.045	0.128269
	2.04843	0.09495		2.04947	0.367999		2.04802	0.089586		2.04833	0.127137
	2.05177	0.094473		2.0528	0.363648		2.05135	0.088453		2.05167	0.126183
	2.0551	0.093937		2.05613	0.359774		2.05468	0.08744		2.055	0.125229
	2.05843	0.093222		2.05947	0.356555		2.05802	0.086546		2.05833	0.124276
	2.06177	0.092387		2.0628	0.354052		2.06135	0.085831		2.06167	0.123382
	2.0651	0.091553		2.06613	0.352323		2.06468	0.085235		2.065	0.122428
	2.06843	0.090718		2.06947	0.351369		2.06802	0.084817		2.06833	0.121474
	2.07177	0.089884		2.0728	0.35131		2.07135	0.0844		2.07167	0.120461
	2.0751	0.089169		2.07613	0.352204		2.07468	0.084102		2.075	0.119388
	2.07843	0.088513		2.07947	0.353932		2.07802	0.083745		2.07833	0.118375
	2.08177	0.088036		2.0828	0.356555		2.08135	0.083387		2.08167	0.117302
	2.0851	0.087619		2.08613	0.360012		2.08468	0.083029		2.085	0.116348
	2.08843	0.087321		2.08947	0.364125		2.08802	0.082612		2.08833	0.115454
	2.09177	0.087082		2.0928	0.368774		2.09135	0.082135		2.09167	0.11462
	2.0951	0.086844		2.09613	0.373781		2.09468	0.081658		2.095	0.113904
	2.09843	0.086665		2.09947	0.379026		2.09802	0.081182		2.09833	0.113249
	2.10177	0.086546		2.1028	0.384331		2.10135	0.080705		2.10167	0.112653
	2.1051	0.086367		2.10613	0.389516		2.10468	0.080287		2.105	0.112057
	2.10843	0.086248		2.10947	0.394464		2.10802	0.07987		2.10833	0.111401
	2.11177	0.086188		2.1128	0.399053		2.11135	0.079453		2.11167	0.110745
	2.1151	0.086129		2.11613	0.403225		2.11468	0.079095		2.115	0.109971
	2.11843	0.086129		2.11947	0.4071		2.11802	0.078738		2.11833	0.109136
	2.12177	0.086069		2.1228	0.410676		2.12135	0.078321		2.12167	0.108242
	2.1251	0.08595		2.12613	0.414014		2.12468	0.077844		2.125	0.107288
	2.12843	0.085652		2.12947	0.417233		2.12802	0.077307		2.12833	0.106335
	2.13177	0.085235		2.1328	0.42057		2.13135	0.076711		2.13167	0.105441
	2.1351	0.084639		2.13613	0.424027		2.13468	0.076115		2.135	0.104547
	2.13843	0.083864		2.13947	0.427842		2.13802	0.075519		2.13833	0.103772
	2.14177	0.08285		2.1428	0.432134		2.14135	0.074863		2.14167	0.103056
	2.1451	0.081778		2.14613	0.436902		2.14468	0.074267		2.145	0.10246
	2.14843	0.080585		2.14947	0.442326		2.14802	0.073671		2.14833	0.101924
	2.15177	0.079393		2.1528	0.448346		2.15135	0.073075		2.15167	0.101507
	2.1551	0.078261		2.15613	0.455081		2.15468	0.072479		2.155	0.101089
	2.15843	0.077248		2.15947	0.462472		2.15802	0.072002		2.15833	0.100672
	2.16177	0.076413		2.1628	0.4704		2.16135	0.071466		2.16167	0.100255
	2.1651	0.075698		2.16613	0.478804		2.16468	0.071049		2.165	0.099778
	2.16843	0.075102		2.16947	0.487447		2.16802	0.070572		2.16833	0.099242
	2.17177	0.074625		2.1728	0.496209		2.17135	0.070155		2.17167	0.098586
	2.1751	0.074267		2.17613	0.504792		2.17468	0.069737		2.175	0.09793
	2.17843	0.07391		2.17947	0.512958		2.17802	0.06938		2.17833	0.097215
	2.18177	0.073612		2.1828	0.520468		2.18135	0.069082		2.18167	0.0965
	2.1851	0.073314		2.18613	0.527024		2.18468	0.068843		2.185	0.095844
	2.18843	0.073016		2.18947	0.532389		2.18802	0.068605		2.18833	0.095367
	2.19177	0.072718		2.1928	0.536382		2.19135	0.068426		2.19167	0.09501
	2.1951	0.07242		2.19613	0.538766		2.19468	0.068307		2.195	0.094891
	2.19843	0.072062		2.19947	0.539482		2.19802	0.068188		2.19833	0.09495
	2.20177	0.071764		2.2028	0.538409		2.20135	0.068069		2.20167	0.095248
	2.2051	0.071406		2.20613	0.535607		2.20468	0.067949		2.205	0.095606
	2.20843	0.071108		2.20947	0.531018		2.20802	0.06789		2.20833	0.096083
	2.21177	0.07081		2.2128	0.524819		2.21135	0.06783		2.21167	0.09656
	2.2151	0.070572		2.21613	0.51707		2.21468	0.06777		2.215	0.096977
	2.21843	0.070333		2.21947	0.50813		2.21802	0.06777		2.21833	0.097334
	2.22177	0.070214		2.2228	0.498116		2.22135	0.06777		2.22167	0.097513
	2.2251	0.070274		2.22613	0.487268		2.22468	0.06783		2.225	0.097632
	2.22843	0.070393		2.22947	0.475824		2.22802	0.06789		2.22833	0.097573
	2.23177	0.070632		2.2328	0.464082		2.23135	0.067949		2.23167	0.097394
	2.2351	0.07093		2.23613	0.45222		2.23468	0.068009		2.235	0.097096
	2.23843	0.071287		2.23947	0.440419		2.23802	0.068009		2.23833	0.096738
	2.24177	0.071645		2.2428	0.428855		2.24135	0.067949		2.24167	0.096262
	2.2451	0.071943		2.24613	0.41765		2.24468	0.06777		2.245	0.095725
	2.24843	0.072181		2.24947	0.406861		2.24802	0.067413		2.24833	0.095129
	2.25177	0.072241		2.2528	0.39655		2.25135	0.066936		2.25167	0.094473
	2.2551	0.072122		2.25613	0.386775		2.25468	0.06634		2.255	0.093699
	2.25843	0.071883		2.25947	0.377536		2.25802	0.065684		2.25833	0.092983
	2.26177	0.071466		2.2628	0.368774		2.26135	0.065029		2.26167	0.092149
	2.2651	0.070989		2.26613	0.360489		2.26468	0.064313		2.265	0.091374
	2.26843	0.070393		2.26947	0.352681		2.26802	0.063717		2.26833	0.090599
	2.27177	0.069797		2.2728	0.34529		2.27135	0.063181		2.27167	0.089824
	2.2751	0.069201		2.27613	0.338256		2.27468	0.062823		2.275	0.089049
	2.27843	0.068605		2.27947	0.331581		2.27802	0.062585		2.27833	0.088274
	2.28177	0.068069		2.2828	0.325203		2.28135	0.062466		2.28167	0.08744
	2.2851	0.067592		2.28613	0.319064		2.28468	0.062406		2.285	0.086606
	2.28843	0.067115		2.28947	0.313222		2.28802	0.062466		2.28833	0.085652
	2.29177	0.066698		2.2928	0.3075		2.29135	0.062466		2.29167	0.084698
	2.2951	0.06628		2.29613	0.302017		2.29468	0.062406		2.295	0.083685
	2.29843	0.065863		2.29947	0.296712		2.29802	0.062287		2.29833	0.082612
	2.30177	0.065446		2.3028	0.291646		2.30135	0.062108		2.30167	0.081539
	2.3051	0.064969		2.30613	0.286698		2.30468	0.06187		2.305	0.080526
	2.30843	0.064552		2.30947	0.28187		2.30802	0.061572		2.30833	0.079572
	2.31177	0.064015		2.3128	0.277281		2.31135	0.061274		2.31167	0.078678
	2.3151	0.063539		2.31613	0.272751		2.31468	0.060976		2.315	0.077903
	2.31843	0.062943		2.31947	0.268459		2.31802	0.060678		2.31833	0.077188
	2.32177	0.062406		2.3228	0.264287		2.32135	0.060499		2.32167	0.076592
	2.3251	0.06181		2.32613	0.260353		2.32468	0.06032		2.325	0.076056
	2.32843	0.061274		2.32947	0.256717		2.32802	0.060201		2.32833	0.075519
	2.33177	0.060737		2.3328	0.25332		2.33135	0.060141		2.33167	0.075042
	2.3351	0.060201		2.33613	0.25028		2.33468	0.060022		2.335	0.074565
	2.33843	0.059783		2.33947	0.247538		2.33802	0.059903		2.33833	0.074029
	2.34177	0.059366		2.3428	0.245214		2.34135	0.059724		2.34167	0.073493
	2.3451	0.059068		2.34613	0.243187		2.34468	0.059426		2.345	0.072896
	2.34843	0.05877		2.34947	0.241518		2.34802	0.059128		2.34833	0.0723
	2.35177	0.058532		2.3528	0.240088		2.35135	0.05877		2.35167	0.071704
	2.3551	0.058293		2.35613	0.238836		2.35468	0.058472		2.355	0.071168
	2.35843	0.058055		2.35947	0.237644		2.35802	0.058174		2.35833	0.070691
	2.36177	0.057817		2.3628	0.236511		2.36135	0.057936		2.36167	0.070393
	2.3651	0.057518		2.36613	0.235319		2.36468	0.057817		2.365	0.070274
	2.36843	0.05728		2.36947	0.234067		2.36802	0.057817		2.36833	0.070333
	2.37177	0.057101		2.3728	0.232756		2.37135	0.057936		2.37167	0.070512
	2.3751	0.056982		2.37613	0.231266		2.37468	0.058115		2.375	0.07081
	2.37843	0.056863		2.37947	0.229716		2.37802	0.058353		2.37833	0.071168
	2.38177	0.056922		2.3828	0.228047		2.38135	0.058711		2.38167	0.071526
	2.3851	0.056982		2.38613	0.226259		2.38468	0.059009		2.385	0.071704
	2.38843	0.057161		2.38947	0.224352		2.38802	0.059307		2.38833	0.071824
	2.39177	0.057459		2.3928	0.222445		2.39135	0.059605		2.39167	0.071704
	2.3951	0.057876		2.39613	0.220418		2.39468	0.059843		2.395	0.071347
	2.39843	0.058353		2.39947	0.218391		2.39802	0.060081		2.39833	0.07087
	2.40177	0.05883		2.4028	0.216305		2.40135	0.06026		2.40167	0.070214
	2.4051	0.059307		2.40613	0.214159		2.40468	0.060439		2.405	0.069499
	2.40843	0.059724		2.40947	0.211954		2.40802	0.060558		2.40833	0.068724
	2.41177	0.060081		2.4128	0.209808		2.41135	0.060678		2.41167	0.06789
	2.4151	0.06038		2.41613	0.207603		2.41468	0.060737		2.415	0.067055
	2.41843	0.060558		2.41947	0.205398		2.41802	0.060678		2.41833	0.066221
	2.42177	0.060678		2.4228	0.203192		2.42135	0.060618		2.42167	0.065386
	2.4251	0.060678		2.42613	0.201046		2.42468	0.060439		2.425	0.064671
	2.42843	0.060499		2.42947	0.198901		2.42802	0.06026		2.42833	0.063956
	2.43177	0.06032		2.4328	0.196815		2.43135	0.060081		2.43167	0.0633
	2.4351	0.060022		2.43613	0.194669		2.43468	0.059903		2.435	0.062704
	2.43843	0.059724		2.43947	0.192523		2.43802	0.059783		2.43833	0.062227
	2.44177	0.059307		2.4428	0.190318		2.44135	0.059783		2.44167	0.06181
	2.4451	0.058889		2.44613	0.188112		2.44468	0.059843		2.445	0.061512
	2.44843	0.058472		2.44947	0.185847		2.44802	0.060081		2.44833	0.061274
	2.45177	0.058055		2.4528	0.183582		2.45135	0.06038		2.45167	0.061095
	2.4551	0.057697		2.45613	0.181258		2.45468	0.060678		2.455	0.061035
	2.45843	0.057399		2.45947	0.178993		2.45802	0.061035		2.45833	0.060976
	2.46177	0.057161		2.4628	0.176728		2.46135	0.061393		2.46167	0.061035
	2.4651	0.057042		2.46613	0.174582		2.46468	0.061631		2.465	0.061095
	2.46843	0.057042		2.46947	0.172555		2.46802	0.06187		2.46833	0.061214
	2.47177	0.057161		2.4728	0.170648		2.47135	0.062048		2.47167	0.061393
	2.4751	0.05734		2.47613	0.16892		2.47468	0.062227		2.475	0.061691
	2.47843	0.057518		2.47947	0.167429		2.47802	0.062346		2.47833	0.062108
	2.48177	0.057697		2.4828	0.166118		2.48135	0.062525		2.48167	0.062644
	2.4851	0.057876		2.48613	0.165045		2.48468	0.062704		2.485	0.063241
	2.48843	0.057936		2.48947	0.164092		2.48802	0.062883		2.48833	0.063896
	2.49177	0.057995		2.4928	0.163257		2.49135	0.063002		2.49167	0.064433
	2.4951	0.057995		2.49613	0.162542		2.49468	0.063062		2.495	0.064909
	2.49843	0.057995		2.49947	0.161827		2.49802	0.063002		2.49833	0.065207
	2.50177	0.057995		2.5028	0.161052		2.50135	0.062883		2.50167	0.065327
	2.5051	0.057995		2.50613	0.160277		2.50468	0.062585		2.505	0.065207
	2.50843	0.058115		2.50947	0.159442		2.50802	0.062227		2.50833	0.06479
	2.51177	0.058234		2.5128	0.158608		2.51135	0.06181		2.51167	0.064194
	2.5151	0.058353		2.51613	0.157773		2.51468	0.061333		2.515	0.063419
	2.51843	0.058472		2.51947	0.157058		2.51802	0.060916		2.51833	0.062644
	2.52177	0.058472		2.5228	0.156522		2.52135	0.060439		2.52167	0.06181
	2.5251	0.058472		2.52613	0.156283		2.52468	0.060022		2.525	0.061095
	2.52843	0.058293		2.52947	0.156283		2.52802	0.059545		2.52833	0.06038
	2.53177	0.057936		2.5328	0.156641		2.53135	0.059128		2.53167	0.059843
	2.5351	0.057518		2.53613	0.157297		2.53468	0.058591		2.535	0.059366
	2.53843	0.056922		2.53947	0.15831		2.53802	0.057995		2.53833	0.058949
	2.54177	0.056267		2.5428	0.159621		2.54135	0.057399		2.54167	0.058651
	2.5451	0.055611		2.54613	0.16129		2.54468	0.056803		2.545	0.058293
	2.54843	0.055015		2.54947	0.163317		2.54802	0.056207		2.54833	0.057936
	2.55177	0.054419		2.5528	0.16582		2.55135	0.055671		2.55167	0.057518
	2.5551	0.053942		2.55613	0.168741		2.55468	0.055194		2.555	0.057042
	2.55843	0.053585		2.55947	0.172257		2.55802	0.054836		2.55833	0.056565
	2.56177	0.053346		2.5628	0.176311		2.56135	0.054598		2.56167	0.056028
	2.5651	0.053227		2.56613	0.181139		2.56468	0.054538		2.565	0.055492
	2.56843	0.053167		2.56947	0.186682		2.56802	0.054598		2.56833	0.054955
	2.57177	0.053167		2.5728	0.193059		2.57135	0.054777		2.57167	0.054479
	2.5751	0.053167		2.57613	0.200272		2.57468	0.054955		2.575	0.054061
	2.57843	0.053108		2.57947	0.208497		2.57802	0.055254		2.57833	0.053704
	2.58177	0.053048		2.5828	0.217676		2.58135	0.055492		2.58167	0.053525
	2.5851	0.052989		2.58613	0.228047		2.58468	0.05573		2.585	0.053346
	2.58843	0.052869		2.58947	0.23967		2.58802	0.05585		2.58833	0.053287
	2.59177	0.052691		2.5928	0.252664		2.59135	0.055909		2.59167	0.053346
	2.5951	0.052571		2.59613	0.267148		2.59468	0.05585		2.595	0.053406
	2.59843	0.052392		2.59947	0.283301		2.59802	0.055671		2.59833	0.053465
	2.60177	0.052273		2.6028	0.301242		2.60135	0.055373		2.60167	0.053585
	2.6051	0.052214		2.60613	0.321031		2.60468	0.055015		2.605	0.053763
	2.60843	0.052214		2.60947	0.342727		2.60802	0.054598		2.60833	0.053942
	2.61177	0.052333		2.6128	0.366449		2.61135	0.054121		2.61167	0.054121
	2.6151	0.052571		2.61613	0.392139		2.61468	0.053704		2.615	0.0543
	2.61843	0.05281		2.61947	0.419676		2.61802	0.053406		2.61833	0.054479
	2.62177	0.053167		2.6228	0.449121		2.62135	0.053167		2.62167	0.054717
	2.6251	0.053585		2.62613	0.480175		2.62468	0.053108		2.625	0.054836
	2.62843	0.054002		2.62947	0.512719		2.62802	0.053227		2.62833	0.055015
	2.63177	0.054419		2.6328	0.546396		2.63135	0.053465		2.63167	0.055194
	2.6351	0.054777		2.63613	0.580907		2.63468	0.053883		2.635	0.055373
	2.63843	0.055015		2.63947	0.615776		2.63802	0.054359		2.63833	0.055552
	2.64177	0.055194		2.6428	0.650704		2.64135	0.054955		2.64167	0.05579
	2.6451	0.055254		2.64613	0.685155		2.64468	0.055611		2.645	0.056148
	2.64843	0.055134		2.64947	0.718653		2.64802	0.056267		2.64833	0.056565
	2.65177	0.055015		2.6528	0.750661		2.65135	0.056982		2.65167	0.057101
	2.6551	0.054777		2.65613	0.780821		2.65468	0.057697		2.655	0.057638
	2.65843	0.054598		2.65947	0.808656		2.65802	0.058353		2.65833	0.058234
	2.66177	0.054419		2.6628	0.833809		2.66135	0.059009		2.66167	0.058889
	2.6651	0.0543		2.66613	0.856042		2.66468	0.059605		2.665	0.059605
	2.66843	0.054359		2.66947	0.875056		2.66802	0.060201		2.66833	0.06026
	2.67177	0.054479		2.6728	0.890732		2.67135	0.060618		2.67167	0.060856
	2.6751	0.054717		2.67613	0.902891		2.67468	0.060976		2.675	0.061452
	2.67843	0.055075		2.67947	0.911593		2.67802	0.061274		2.67833	0.062048
	2.68177	0.055552		2.6828	0.916839		2.68135	0.061512		2.68167	0.062764
	2.6851	0.056028		2.68613	0.918746		2.68468	0.06175		2.685	0.063539
	2.68843	0.056565		2.68947	0.917435		2.68802	0.062048		2.68833	0.064433
	2.69177	0.057161		2.6928	0.913203		2.69135	0.062406		2.69167	0.065506
	2.6951	0.057876		2.69613	0.906229		2.69468	0.062943		2.695	0.066757
	2.69843	0.058711		2.69947	0.896931		2.69802	0.063658		2.69833	0.068307
	2.70177	0.059724		2.7028	0.885546		2.70135	0.064671		2.70167	0.070155
	2.7051	0.061035		2.70613	0.872672		2.70468	0.065982		2.705	0.07242
	2.70843	0.062704		2.70947	0.858665		2.70802	0.067651		2.70833	0.075161
	2.71177	0.06485		2.7128	0.844002		2.71135	0.069737		2.71167	0.07844
	2.7151	0.067532		2.71613	0.82916		2.71468	0.0723		2.715	0.082433
	2.71843	0.07081		2.71947	0.814617		2.71802	0.07534		2.71833	0.087261
	2.72177	0.074744		2.7228	0.800788		2.72135	0.078917		2.72167	0.093102
	2.7251	0.079453		2.72613	0.788093		2.72468	0.083029		2.725	0.100076
	2.72843	0.084877		2.72947	0.776887		2.72802	0.087857		2.72833	0.108361
	2.73177	0.091016		2.7328	0.76741		2.73135	0.093341		2.73167	0.118136
	2.7351	0.097871		2.73613	0.759959		2.73468	0.099599		2.735	0.129402
	2.73843	0.105441		2.73947	0.754714		2.73802	0.106633		2.73833	0.142276
	2.74177	0.113726		2.7428	0.751793		2.74135	0.114381		2.74167	0.15682
	2.7451	0.122666		2.74613	0.751197		2.74468	0.122964		2.745	0.173032
	2.74843	0.132143		2.74947	0.753045		2.74802	0.132203		2.74833	0.190854
	2.75177	0.142157		2.7528	0.757217		2.75135	0.142157		2.75167	0.210166
	2.7551	0.152647		2.75613	0.763655		2.75468	0.152528		2.755	0.230968
	2.75843	0.163376		2.75947	0.772297		2.75802	0.163317		2.75833	0.253022
	2.76177	0.174284		2.7628	0.783026		2.76135	0.174284		2.76167	0.276148
	2.7651	0.185251		2.76613	0.795662		2.76468	0.185251		2.765	0.30005
	2.76843	0.196099		2.76947	0.810146		2.76802	0.19598		2.76833	0.324488
	2.77177	0.20659		2.7728	0.826418		2.77135	0.206292		2.77167	0.349104
	2.7751	0.216603		2.77613	0.844479		2.77468	0.216067		2.775	0.373542
	2.77843	0.225961		2.77947	0.864446		2.77802	0.225186		2.77833	0.397325
	2.78177	0.234485		2.7828	0.886619		2.78135	0.233412		2.78167	0.420153
	2.7851	0.242054		2.78613	0.911415		2.78468	0.240743		2.785	0.441551
	2.78843	0.248611		2.78947	0.939369		2.78802	0.247061		2.78833	0.461161
	2.79177	0.253916		2.7928	0.971317		2.79135	0.252247		2.79167	0.478685
	2.7951	0.258029		2.79613	1.00815		2.79468	0.2563		2.795	0.493884
	2.79843	0.26089		2.79947	1.05095		2.79802	0.25928		2.79833	0.50652
	2.80177	0.262558		2.8028	1.10102		2.80135	0.261068		2.80167	0.516534
	2.8051	0.262976		2.80613	1.15955		2.80468	0.261724		2.805	0.523806
	2.80843	0.26226		2.80947	1.22786		2.80802	0.261366		2.80833	0.528455
	2.81177	0.260472		2.8128	1.30725		2.81135	0.259995		2.81167	0.530541
	2.8151	0.257671		2.81613	1.39874		2.81468	0.25779		2.815	0.530124
	2.81843	0.254035		2.81947	1.50329		2.81802	0.25481		2.81833	0.527442
	2.82177	0.249624		2.8228	1.62142		2.82135	0.251174		2.82167	0.522673
	2.8251	0.244617		2.82613	1.75333		2.82468	0.246942		2.825	0.516117
	2.82843	0.239015		2.82947	1.89871		2.82802	0.242293		2.82833	0.507891
	2.83177	0.232995		2.8328	2.0569		2.83135	0.237226		2.83167	0.498235
	2.8351	0.226676		2.83613	2.22665		2.83468	0.231862		2.835	0.487447
	2.83843	0.22018		2.83947	2.40612		2.83802	0.2262		2.83833	0.475764
	2.84177	0.213563		2.8428	2.59322		2.84135	0.220358		2.84167	0.463247
	2.8451	0.206947		2.84613	2.78526		2.84468	0.214338		2.845	0.450134
	2.84843	0.20045		2.84947	2.97928		2.84802	0.208199		2.84833	0.436604
	2.85177	0.194013		2.8528	3.17216		2.85135	0.202		2.85167	0.422776
	2.8551	0.187755		2.85613	3.36051		2.85468	0.195801		2.855	0.408828
	2.85843	0.181735		2.85947	3.54117		2.85802	0.189722		2.85833	0.394881
	2.86177	0.176013		2.8628	3.71087		2.86135	0.183702		2.86167	0.381052
	2.8651	0.170469		2.86613	3.86673		2.86468	0.17786		2.865	0.367403
	2.86843	0.165284		2.86947	4.00603		2.86802	0.172198		2.86833	0.354052
	2.87177	0.160396		2.8728	4.12667		2.87135	0.166774		2.87167	0.341117
	2.8751	0.155747		2.87613	4.22686		2.87468	0.161588		2.875	0.328541
	2.87843	0.151396		2.87947	4.30542		2.87802	0.156701		2.87833	0.316441
	2.88177	0.147283		2.8828	4.36169		2.88135	0.152111		2.88167	0.304818
	2.8851	0.143409		2.88613	4.39548		2.88468	0.14776		2.885	0.293732
	2.88843	0.139773		2.88947	4.40723		2.88802	0.143588		2.88833	0.283182
	2.89177	0.136256		2.8928	4.39775		2.89135	0.139654		2.89167	0.273168
	2.8951	0.132918		2.89613	4.36819		2.89468	0.135899		2.895	0.263751
	2.89843	0.12964		2.89947	4.3202		2.89802	0.132322		2.89833	0.254929
	2.90177	0.126541		2.9028	4.25547		2.90135	0.128925		2.90167	0.246644
	2.9051	0.123501		2.90613	4.17608		2.90468	0.125647		2.905	0.238895
	2.90843	0.120521		2.90947	4.08393		2.90802	0.122547		2.90833	0.231683
	2.91177	0.11766		2.9128	3.98117		2.91135	0.119567		2.91167	0.225008
	2.9151	0.114858		2.91613	3.86977		2.91468	0.116706		2.915	0.218689
	2.91843	0.112116		2.91947	3.75176		2.91802	0.114083		2.91833	0.212848
	2.92177	0.109553		2.9228	3.62885		2.92135	0.11158		2.92167	0.207305
	2.9251	0.10699		2.92613	3.50285		2.92468	0.109196		2.925	0.202
	2.92843	0.104547		2.92947	3.37517		2.92802	0.10699		2.92833	0.196934
	2.93177	0.102103		2.9328	3.24726		2.93135	0.104845		2.93167	0.191987
	2.9351	0.099719		2.93613	3.12024		2.93468	0.102758		2.935	0.187099
	2.93843	0.097334		2.93947	2.99501		2.93802	0.100791		2.93833	0.182331
	2.94177	0.09501		2.9428	2.87247		2.94135	0.098825		2.94167	0.177562
	2.9451	0.092685		2.94613	2.75326		2.94468	0.096858		2.945	0.172913
	2.94843	0.090361		2.94947	2.63774		2.94802	0.09495		2.94833	0.168324
	2.95177	0.088096		2.9528	2.52634		2.95135	0.093043		2.95167	0.163853
	2.9551	0.08589		2.95613	2.41935		2.95468	0.091195		2.955	0.159562
	2.95843	0.083745		2.95947	2.31683		2.95802	0.089407		2.95833	0.155509
	2.96177	0.081778		2.9628	2.21896		2.96135	0.087619		2.96167	0.151694
	2.9651	0.07987		2.96613	2.12568		2.96468	0.08595		2.965	0.148177
	2.96843	0.078142		2.96947	2.03699		2.96802	0.084341		2.96833	0.144899
	2.97177	0.076592		2.9728	1.95277		2.97135	0.082791		2.97167	0.141919
	2.9751	0.075281		2.97613	1.87296		2.97468	0.08136		2.975	0.139236
	2.97843	0.074089		2.97947	1.79732		2.97802	0.079989		2.97833	0.136673
	2.98177	0.073075		2.9828	1.72573		2.98135	0.078738		2.98167	0.13417
	2.9851	0.072181		2.98613	1.65796		2.98468	0.077605		2.985	0.131786
	2.98843	0.071406		2.98947	1.59383		2.98802	0.076652		2.98833	0.129402
	2.99177	0.070751		2.9928	1.53321		2.99135	0.075758		2.99167	0.126958
	2.9951	0.070095		2.99613	1.47575		2.99468	0.075042		2.995	0.124395
	2.99843	0.069439		2.99947	1.42139		2.99802	0.074506		2.99833	0.121832
	3.00177	0.068784		3.0028	1.36983		3.00135	0.074148		3.00167	0.119209
	3.0051	0.068069		3.00613	1.32102		3.00468	0.07385		3.005	0.116587
	3.00843	0.067353		3.00947	1.27465		3.00802	0.073671		3.00833	0.113964
	3.01177	0.066578		3.0128	1.2306		3.01135	0.073552		3.01167	0.11152
	3.0151	0.065863		3.01613	1.18876		3.01468	0.073493		3.015	0.109136
	3.01843	0.065148		3.01947	1.14888		3.01802	0.073314		3.01833	0.10699
	3.02177	0.064492		3.0228	1.11085		3.02135	0.073075		3.02167	0.105083
	3.0251	0.063896		3.02613	1.07455		3.02468	0.072777		3.025	0.103354
	3.02843	0.063419		3.02947	1.03986		3.02802	0.0723		3.02833	0.101805
	3.03177	0.063062		3.0328	1.00678		3.03135	0.071704		3.03167	0.100374
	3.0351	0.062823		3.03613	0.975132		3.03468	0.071049		3.035	0.099063
	3.03843	0.062585		3.03947	0.944853		3.03802	0.070333		3.03833	0.097871
	3.04177	0.062466		3.0428	0.916064		3.04135	0.069678		3.04167	0.096738
	3.0451	0.062346		3.04613	0.888586		3.04468	0.069022		3.045	0.095665
	3.04843	0.062227		3.04947	0.862539		3.04802	0.068426		3.04833	0.094593
	3.05177	0.062168		3.0528	0.837922		3.05135	0.067949		3.05167	0.093639
	3.0551	0.062048		3.05613	0.814676		3.05468	0.067532		3.055	0.092685
	3.05843	0.061929		3.05947	0.792861		3.05802	0.067294		3.05833	0.091791
	3.06177	0.06181		3.0628	0.772536		3.06135	0.067174		3.06167	0.090957
	3.0651	0.061572		3.06613	0.753582		3.06468	0.067055		3.065	0.090182
	3.06843	0.061393		3.06947	0.736058		3.06802	0.067055		3.06833	0.089407
	3.07177	0.061154		3.0728	0.719965		3.07135	0.067055		3.07167	0.088692
	3.0751	0.060856		3.07613	0.705361		3.07468	0.066996		3.075	0.087917
	3.07843	0.060618		3.07947	0.692189		3.07802	0.066936		3.07833	0.087142
	3.08177	0.06038		3.0828	0.680506		3.08135	0.066817		3.08167	0.086367
	3.0851	0.060141		3.08613	0.670314		3.08468	0.066638		3.085	0.085592
	3.08843	0.059903		3.08947	0.661731		3.08802	0.0664		3.08833	0.084758
	3.09177	0.059724		3.0928	0.654697		3.09135	0.066102		3.09167	0.083983
	3.0951	0.059664		3.09613	0.649273		3.09468	0.065744		3.095	0.083208
	3.09843	0.059605		3.09947	0.645518		3.09802	0.065327		3.09833	0.082552
	3.10177	0.059724		3.1028	0.643313		3.10135	0.064909		3.10167	0.081897
	3.1051	0.059903		3.10613	0.642776		3.10468	0.064433		3.105	0.081301
	3.10843	0.060201		3.10947	0.64379		3.10802	0.064015		3.10833	0.080764
	3.11177	0.060618		3.1128	0.646293		3.11135	0.063539		3.11167	0.080287
	3.1151	0.060976		3.11613	0.650167		3.11468	0.063121		3.115	0.07987
	3.11843	0.061393		3.11947	0.655293		3.11802	0.062764		3.11833	0.079513
	3.12177	0.06175		3.1228	0.661552		3.12135	0.062406		3.12167	0.079155
	3.1251	0.062048		3.12613	0.668883		3.12468	0.062168		3.125	0.078857
	3.12843	0.062168		3.12947	0.67699		3.12802	0.061989		3.12833	0.078619
	3.13177	0.062108		3.1328	0.685811		3.13135	0.06175		3.13167	0.07838
	3.1351	0.061929		3.13613	0.695169		3.13468	0.061572		3.135	0.078142
	3.13843	0.061631		3.13947	0.704765		3.13802	0.061333		3.13833	0.077963
	3.14177	0.061154		3.1428	0.71454		3.14135	0.061095		3.14167	0.077844
	3.1451	0.060737		3.14613	0.724196		3.14468	0.060737		3.145	0.077724
	3.14843	0.06026		3.14947	0.733554		3.14802	0.06038		3.14833	0.077605
	3.15177	0.059783		3.1528	0.742495		3.15135	0.059962		3.15167	0.077426
	3.1551	0.059426		3.15613	0.75078		3.15468	0.059485		3.155	0.077248
	3.15843	0.059068		3.15947	0.758231		3.15802	0.059068		3.15833	0.077009
	3.16177	0.05877		3.1628	0.764787		3.16135	0.058651		3.16167	0.076711
	3.1651	0.058532		3.16613	0.77033		3.16468	0.058353		3.165	0.076294
	3.16843	0.058293		3.16947	0.774741		3.16802	0.058174		3.16833	0.075877
	3.17177	0.058055		3.1728	0.778019		3.17135	0.058055		3.17167	0.075459
	3.1751	0.057757		3.17613	0.780106		3.17468	0.058055		3.175	0.075102
	3.17843	0.057459		3.17947	0.78088		3.17802	0.058115		3.17833	0.074744
	3.18177	0.057161		3.1828	0.780523		3.18135	0.058174		3.18167	0.074446
	3.1851	0.056863		3.18613	0.779033		3.18468	0.058293		3.185	0.074208
	3.18843	0.056624		3.18947	0.77647		3.18802	0.058413		3.18833	0.074029
	3.19177	0.056446		3.1928	0.772893		3.19135	0.058413		3.19167	0.07391
	3.1951	0.056386		3.19613	0.768542		3.19468	0.058472		3.195	0.07385
	3.19843	0.056386		3.19947	0.763535		3.19802	0.058413		3.19833	0.073791
	3.20177	0.056565		3.2028	0.758052		3.20135	0.058353		3.20167	0.073731
	3.2051	0.056863		3.20613	0.75233		3.20468	0.058353		3.205	0.073612
	3.20843	0.05734		3.20947	0.746667		3.20802	0.058353		3.20833	0.073552
	3.21177	0.057936		3.2128	0.741422		3.21135	0.058413		3.21167	0.073433
	3.2151	0.05877		3.21613	0.736833		3.21468	0.058651		3.215	0.073314
	3.21843	0.059724		3.21947	0.733376		3.21802	0.058949		3.21833	0.073195
	3.22177	0.060856		3.2228	0.731349		3.22135	0.059366		3.22167	0.073195
	3.2251	0.062227		3.22613	0.731349		3.22468	0.059903		3.225	0.073254
	3.22843	0.063717		3.22947	0.733852		3.22802	0.060618		3.22833	0.073433
	3.23177	0.065506		3.2328	0.739336		3.23135	0.061393		3.23167	0.07385
	3.2351	0.067532		3.23613	0.748396		3.23468	0.062287		3.235	0.074506
	3.23843	0.069857		3.23947	0.761569		3.23802	0.0633		3.23833	0.075519
	3.24177	0.072479		3.2428	0.779331		3.24135	0.064433		3.24167	0.07695
	3.2451	0.075519		3.24613	0.802338		3.24468	0.065684		3.245	0.078857
	3.24843	0.078976		3.24947	0.830948		3.24802	0.067115		3.24833	0.081301
	3.25177	0.08291		3.2528	0.865698		3.25135	0.068724		3.25167	0.084341
	3.2551	0.08738		3.25613	0.906885		3.25468	0.070572		3.255	0.087976
	3.25843	0.092506		3.25947	0.954866		3.25802	0.072718		3.25833	0.092268
	3.26177	0.098228		3.2628	1.00982		3.26135	0.075161		3.26167	0.097156
	3.2651	0.104666		3.26613	1.07187		3.26468	0.078022		3.265	0.102639
	3.26843	0.111639		3.26947	1.14101		3.26802	0.081182		3.26833	0.108719
	3.27177	0.119269		3.2728	1.21701		3.27135	0.084758		3.27167	0.115454
	3.2751	0.127494		3.27613	1.29968		3.27468	0.088692		3.275	0.122845
	3.27843	0.136197		3.27947	1.38861		3.27802	0.092924		3.27833	0.130892
	3.28177	0.145257		3.2828	1.48314		3.28135	0.097513		3.28167	0.139713
	3.2851	0.154674		3.28613	1.58256		3.28468	0.102282		3.285	0.14931
	3.28843	0.164211		3.28947	1.68604		3.28802	0.107229		3.28833	0.15974
	3.29177	0.173807		3.2928	1.79261		3.29135	0.112355		3.29167	0.171065
	3.2951	0.183344		3.29613	1.90121		3.29468	0.11754		3.295	0.183344
	3.29843	0.192702		3.29947	2.01076		3.29802	0.122845		3.29833	0.196457
	3.30177	0.201762		3.3028	2.12002		3.30135	0.12809		3.30167	0.210404
	3.3051	0.210404		3.30613	2.22778		3.30468	0.133336		3.305	0.225246
	3.30843	0.21857		3.30947	2.33287		3.30802	0.138521		3.30833	0.240803
	3.31177	0.22608		3.3128	2.43413		3.31135	0.143528		3.31167	0.257015
	3.3151	0.232995		3.31613	2.5304		3.31468	0.148416		3.315	0.273705
	3.31843	0.239253		3.31947	2.62064		3.31802	0.153065		3.31833	0.290692
	3.32177	0.244796		3.3228	2.70397		3.32135	0.157475		3.32167	0.307858
	3.3251	0.249624		3.32613	2.7796		3.32468	0.161648		3.325	0.325084
	3.32843	0.253677		3.32947	2.84696		3.32802	0.165462		3.32833	0.342131
	3.33177	0.257015		3.3328	2.90543		3.33135	0.16886		3.33167	0.35876
	3.3351	0.259519		3.33613	2.95478		3.33468	0.1719		3.335	0.374854
	3.33843	0.261307		3.33947	2.99496		3.33802	0.174463		3.33833	0.390232
	3.34177	0.26232		3.3428	3.02595		3.34135	0.176549		3.34167	0.404656
	3.3451	0.262618		3.34613	3.04788		3.34468	0.178218		3.345	0.418007
	3.34843	0.262141		3.34947	3.06106		3.34802	0.17935		3.34833	0.430167
	3.35177	0.260949		3.3528	3.06588		3.35135	0.180066		3.35167	0.441015
	3.3551	0.259161		3.35613	3.0629		3.35468	0.180364		3.355	0.450432
	3.35843	0.256717		3.35947	3.05253		3.35802	0.180185		3.35833	0.458419
	3.36177	0.253856		3.3628	3.03549		3.36135	0.179708		3.36167	0.464916
	3.3651	0.250578		3.36613	3.01242		3.36468	0.178874		3.365	0.469983
	3.36843	0.246942		3.36947	2.98393		3.36802	0.177801		3.36833	0.473619
	3.37177	0.243127		3.3728	2.95079		3.37135	0.176549		3.37167	0.476003
	3.3751	0.239193		3.37613	2.91359		3.37468	0.175059		3.375	0.477195
	3.37843	0.2352		3.37947	2.87306		3.37802	0.17339		3.37833	0.477374
	3.38177	0.231266		3.3828	2.82985		3.38135	0.171602		3.38167	0.476599
	3.3851	0.227392		3.38613	2.78461		3.38468	0.169694		3.385	0.47493
	3.38843	0.223637		3.38947	2.73782		3.38802	0.167668		3.38833	0.472605
	3.39177	0.219941		3.3928	2.6902		3.39135	0.165641		3.39167	0.469565
	3.3951	0.216365		3.39613	2.64209		3.39468	0.163496		3.395	0.465989
	3.39843	0.212848		3.39947	2.59417		3.39802	0.161409		3.39833	0.461876
	3.40177	0.209391		3.4028	2.54673		3.40135	0.159383		3.40167	0.457287
	3.4051	0.205934		3.40613	2.5003		3.40468	0.157416		3.405	0.45234
	3.40843	0.202537		3.40947	2.45512		3.40802	0.155509		3.40833	0.447035
	3.41177	0.199199		3.4128	2.4116		3.41135	0.153661		3.41167	0.441432
	3.4151	0.195861		3.41613	2.36994		3.41468	0.151873		3.415	0.43565
	3.41843	0.192702		3.41947	2.33036		3.41802	0.150084		3.41833	0.429749
	3.42177	0.189602		3.4228	2.29305		3.42135	0.148237		3.42167	0.423789
	3.4251	0.186622		3.42613	2.25812		3.42468	0.146329		3.425	0.417948
	3.42843	0.183761		3.42947	2.22558		3.42802	0.144362		3.42833	0.412166
	3.43177	0.181019		3.4328	2.19536		3.43135	0.142217		3.43167	0.406623
	3.4351	0.178516		3.43613	2.16752		3.43468	0.139952		3.435	0.401258
	3.43843	0.176132		3.43947	2.14183		3.43802	0.137687		3.43833	0.396132
	3.44177	0.173926		3.4428	2.11823		3.44135	0.135362		3.44167	0.391185
	3.4451	0.171781		3.44613	2.09647		3.44468	0.133157		3.445	0.386477
	3.44843	0.169814		3.44947	2.07639		3.44802	0.131071		3.44833	0.381947
	3.45177	0.167847		3.4528	2.05767		3.45135	0.129163		3.45167	0.377595
	3.4551	0.165999		3.45613	2.04003		3.45468	0.127435		3.455	0.373423
	3.45843	0.164151		3.45947	2.02322		3.45802	0.125945		3.45833	0.36931
	3.46177	0.162244		3.4628	2.00689		3.46135	0.124574		3.46167	0.365317
	3.4651	0.160336		3.46613	1.9908		3.46468	0.123382		3.465	0.361383
	3.46843	0.15831		3.46947	1.97464		3.46802	0.122309		3.46833	0.357449
	3.47177	0.156343		3.4728	1.95807		3.47135	0.121236		3.47167	0.353575
	3.4751	0.154316		3.47613	1.94091		3.47468	0.120223		3.475	0.34976
	3.47843	0.152409		3.47947	1.92291		3.47802	0.119209		3.47833	0.346005
	3.48177	0.150561		3.4828	1.90383		3.48135	0.118136		3.48167	0.342309
	3.4851	0.148773		3.48613	1.88363		3.48468	0.117004		3.485	0.338614
	3.48843	0.147164		3.48947	1.86223		3.48802	0.115752		3.48833	0.334978
	3.49177	0.145614		3.4928	1.83946		3.49135	0.114441		3.49167	0.331521
	3.4951	0.144184		3.49613	1.81544		3.49468	0.11313		3.495	0.328064
	3.49843	0.142872		3.49947	1.79017		3.49802	0.111759		3.49833	0.324726
	3.50177	0.141561		3.5028	1.7637		3.50135	0.110447		3.50167	0.321448
	3.5051	0.140309		3.50613	1.73616		3.50468	0.109076		3.505	0.318229
	3.50843	0.139058		3.50947	1.70761		3.50802	0.107765		3.50833	0.314951
	3.51177	0.137806		3.5128	1.67811		3.51135	0.106573		3.51167	0.311732
	3.5151	0.136554		3.51613	1.64783		3.51468	0.1055		3.515	0.308454
	3.51843	0.135303		3.51947	1.61678		3.51802	0.104487		3.51833	0.305116
	3.52177	0.13411		3.5228	1.58513		3.52135	0.103652		3.52167	0.301838
	3.5251	0.132978		3.52613	1.553		3.52468	0.102878		3.525	0.29844
	3.52843	0.131905		3.52947	1.52051		3.52802	0.102222		3.52833	0.295103
	3.53177	0.130951		3.5328	1.48773		3.53135	0.101626		3.53167	0.291705
	3.5351	0.129998		3.53613	1.45489		3.53468	0.10103		3.535	0.288367
	3.53843	0.129104		3.53947	1.42217		3.53802	0.100434		3.53833	0.285029
	3.54177	0.12821		3.5428	1.38962		3.54135	0.099897		3.54167	0.281692
	3.5451	0.127316		3.54613	1.35744		3.54468	0.099242		3.545	0.278413
	3.54843	0.126421		3.54947	1.32579		3.54802	0.098586		3.54833	0.275135
	3.55177	0.125587		3.5528	1.29473		3.55135	0.097871		3.55167	0.271857
	3.5551	0.124633		3.55613	1.26433		3.55468	0.097036		3.555	0.268638
	3.55843	0.12368		3.55947	1.23471		3.55802	0.096202		3.55833	0.265479
	3.56177	0.122607		3.5628	1.20592		3.56135	0.095308		3.56167	0.26238
	3.5651	0.121474		3.56613	1.17791		3.56468	0.094414		3.565	0.25934
	3.56843	0.120282		3.56947	1.15067		3.56802	0.09346		3.56833	0.256419
	3.57177	0.11903		3.5728	1.12432		3.57135	0.092566		3.57167	0.253558
	3.5751	0.117719		3.57613	1.09875		3.57468	0.091672		3.575	0.250757
	3.57843	0.116527		3.57947	1.07396		3.57802	0.090778		3.57833	0.248015
	3.58177	0.115395		3.5828	1.05005		3.58135	0.089943		3.58167	0.245333
	3.5851	0.114322		3.58613	1.02693		3.58468	0.089109		3.585	0.24271
	3.58843	0.113428		3.58947	1.00458		3.58802	0.088394		3.58833	0.240147
	3.59177	0.112653		3.5928	0.983059		3.59135	0.087678		3.59167	0.237584
	3.5951	0.111997		3.59613	0.962377		3.59468	0.087023		3.595	0.2352
	3.59843	0.111461		3.59947	0.942528		3.59802	0.086427		3.59833	0.232875
	3.60177	0.110924		3.6028	0.923395		3.60135	0.08589		3.60167	0.23067
	3.6051	0.110388		3.60613	0.905097		3.60468	0.085413		3.605	0.228584
	3.60843	0.109851		3.60947	0.887513		3.60802	0.084937		3.60833	0.226617
	3.61177	0.109255		3.6128	0.870645		3.61135	0.084579		3.61167	0.22471
	3.6151	0.10854		3.61613	0.854492		3.61468	0.084221		3.615	0.222921
	3.61843	0.107884		3.61947	0.838935		3.61802	0.083923		3.61833	0.221133
	3.62177	0.107169		3.6228	0.823915		3.62135	0.083685		3.62167	0.219405
	3.6251	0.106454		3.62613	0.80955		3.62468	0.083447		3.625	0.217736
	3.62843	0.105739		3.62947	0.795662		3.62802	0.083148		3.62833	0.216067
	3.63177	0.105083		3.6328	0.782251		3.63135	0.08291		3.63167	0.214398
	3.6351	0.104427		3.63613	0.769377		3.63468	0.082612		3.635	0.212789
	3.63843	0.103831		3.63947	0.756919		3.63802	0.082254		3.63833	0.211239
	3.64177	0.103176		3.6428	0.744939		3.64135	0.081837		3.64167	0.209749
	3.6451	0.10258		3.64613	0.733376		3.64468	0.08136		3.645	0.208378
	3.64843	0.102043		3.64947	0.722289		3.64802	0.080884		3.64833	0.207126
	3.65177	0.101447		3.6528	0.711739		3.65135	0.080347		3.65167	0.206053
	3.6551	0.100911		3.65613	0.701606		3.65468	0.079811		3.655	0.205219
	3.65843	0.100374		3.65947	0.69201		3.65802	0.079334		3.65833	0.204563
	3.66177	0.099838		3.6628	0.68289		3.66135	0.078917		3.66167	0.204146
	3.6651	0.099301		3.66613	0.674307		3.66468	0.078559		3.665	0.204086
	3.66843	0.098765		3.66947	0.66632		3.66802	0.078261		3.66833	0.204384
	3.67177	0.098288		3.6728	0.658929		3.67135	0.078022		3.67167	0.2051
	3.6751	0.097752		3.67613	0.652075		3.67468	0.077844		3.675	0.206292
	3.67843	0.097275		3.67947	0.645936		3.67802	0.077724		3.67833	0.207961
	3.68177	0.096798		3.6828	0.640452		3.68135	0.077546		3.68167	0.210166
	3.6851	0.096381		3.68613	0.635684		3.68468	0.077367		3.685	0.212967
	3.68843	0.096023		3.68947	0.631809		3.68802	0.077188		3.68833	0.216365
	3.69177	0.095785		3.6928	0.628889		3.69135	0.07689		3.69167	0.220418
	3.6951	0.095665		3.69613	0.626981		3.69468	0.076592		3.695	0.225246
	3.69843	0.095606		3.69947	0.626147		3.69802	0.076234		3.69833	0.230968
	3.70177	0.095606		3.7028	0.626564		3.70135	0.075758		3.70167	0.237584
	3.7051	0.095665		3.70613	0.628173		3.70468	0.075281		3.705	0.245214
	3.70843	0.095785		3.70947	0.631034		3.70802	0.074744		3.70833	0.253975
	3.71177	0.095904		3.7128	0.635147		3.71135	0.074208		3.71167	0.263929
	3.7151	0.095904		3.71613	0.640392		3.71468	0.073731		3.715	0.275075
	3.71843	0.095844		3.71947	0.646651		3.71802	0.073254		3.71833	0.287414
	3.72177	0.095725		3.7228	0.653982		3.72135	0.072777		3.72167	0.300825
	3.7251	0.095427		3.72613	0.662208		3.72468	0.0723		3.725	0.315309
	3.72843	0.095069		3.72947	0.671208		3.72802	0.071883		3.72833	0.330746
	3.73177	0.094712		3.7328	0.680923		3.73135	0.071466		3.73167	0.346899
	3.7351	0.094295		3.73613	0.691235		3.73468	0.071049		3.735	0.363648
	3.73843	0.093877		3.73947	0.702024		3.73802	0.070632		3.73833	0.380814
	3.74177	0.09352		3.7428	0.71311		3.74135	0.070214		3.74167	0.398159
	3.7451	0.093222		3.74613	0.724316		3.74468	0.069857		3.745	0.415444
	3.74843	0.092983		3.74947	0.735521		3.74802	0.069618		3.74833	0.432491
	3.75177	0.092983		3.7528	0.746548		3.75135	0.06938		3.75167	0.449121
	3.7551	0.093043		3.75613	0.757098		3.75468	0.069201		3.755	0.465095
	3.75843	0.093222		3.75947	0.767052		3.75802	0.069082		3.75833	0.480294
	3.76177	0.09346		3.7628	0.776172		3.76135	0.068963		3.76167	0.49454
	3.7651	0.093758		3.76613	0.784338		3.76468	0.068843		3.765	0.507772
	3.76843	0.094056		3.76947	0.79143		3.76802	0.068724		3.76833	0.519812
	3.77177	0.094295		3.7728	0.797391		3.77135	0.068545		3.77167	0.530601
	3.7751	0.094473		3.77613	0.8021		3.77468	0.068307		3.775	0.540018
	3.77843	0.094593		3.77947	0.805557		3.77802	0.068009		3.77833	0.548005
	3.78177	0.094593		3.7828	0.807762		3.78135	0.067711		3.78167	0.554502
	3.7851	0.094473		3.78613	0.808597		3.78468	0.067353		3.785	0.55939
	3.78843	0.094295		3.78947	0.80812		3.78802	0.067115		3.78833	0.562668
	3.79177	0.094116		3.7928	0.806272		3.79135	0.066876		3.79167	0.564158
	3.7951	0.093877		3.79613	0.803113		3.79468	0.066757		3.795	0.563979
	3.79843	0.093639		3.79947	0.798583		3.79802	0.066757		3.79833	0.562131
	3.80177	0.093341		3.8028	0.792742		3.80135	0.066757		3.80167	0.558674
	3.8051	0.093043		3.80613	0.785649		3.80468	0.066757		3.805	0.553787
	3.80843	0.092685		3.80947	0.777483		3.80802	0.066757		3.80833	0.547528
	3.81177	0.092328		3.8128	0.768244		3.81135	0.066698		3.81167	0.540078
	3.8151	0.091791		3.81613	0.758231		3.81468	0.066638		3.815	0.531614
	3.81843	0.091255		3.81947	0.747561		3.81802	0.066459		3.81833	0.522316
	3.82177	0.090599		3.8228	0.736415		3.82135	0.066221		3.82167	0.512362
	3.8251	0.089824		3.82613	0.724912		3.82468	0.065923		3.825	0.501871
	3.82843	0.089109		3.82947	0.713289		3.82802	0.065744		3.82833	0.490963
	3.83177	0.088334		3.8328	0.701547		3.83135	0.065565		3.83167	0.479698
	3.8351	0.087678		3.83613	0.689805		3.83468	0.065506		3.835	0.468254
	3.83843	0.087142		3.83947	0.678122		3.83802	0.065506		3.83833	0.456691
	3.84177	0.086665		3.8428	0.666678		3.84135	0.065565		3.84167	0.445008
	3.8451	0.086248		3.84613	0.655413		3.84468	0.065625		3.845	0.433326
	3.84843	0.08595		3.84947	0.644445		3.84802	0.065684		3.84833	0.421703
	3.85177	0.085771		3.8528	0.633836		3.85135	0.065744		3.85167	0.410199
	3.8551	0.085652		3.85613	0.623584		3.85468	0.065684		3.855	0.398874
	3.85843	0.085652		3.85947	0.613809		3.85802	0.065625		3.85833	0.387788
	3.86177	0.085592		3.8628	0.604451		3.86135	0.065565		3.86167	0.37694
	3.8651	0.085652		3.86613	0.595689		3.86468	0.065446		3.865	0.36639
	3.86843	0.085711		3.86947	0.587404		3.86802	0.065327		3.86833	0.356197
	3.87177	0.085771		3.8728	0.579655		3.87135	0.065327		3.87167	0.346363
	3.8751	0.08589		3.87613	0.572443		3.87468	0.065327		3.875	0.336885
	3.87843	0.08601		3.87947	0.565767		3.87802	0.065386		3.87833	0.327826
	3.88177	0.086129		3.8828	0.559628		3.88135	0.065506		3.88167	0.319242
	3.8851	0.086308		3.88613	0.554085		3.88468	0.065625		3.885	0.311077
	3.88843	0.086367		3.88947	0.549078		3.88802	0.065744		3.88833	0.303388
	3.89177	0.086486		3.8928	0.544667		3.89135	0.065863		3.89167	0.296116
	3.8951	0.086606		3.89613	0.540853		3.89468	0.065923		3.895	0.289261
	3.89843	0.086784		3.89947	0.537694		3.89802	0.065982		3.89833	0.282884
	3.90177	0.087082		3.9028	0.53519		3.90135	0.065982		3.90167	0.276983
	3.9051	0.08738		3.90613	0.533402		3.90468	0.065982		3.905	0.271559
	3.90843	0.087678		3.90947	0.532389		3.90802	0.065982		3.90833	0.266552
	3.91177	0.088096		3.9128	0.53221		3.91135	0.065982		3.91167	0.262082
	3.9151	0.088573		3.91613	0.532985		3.91468	0.065982		3.915	0.258088
	3.91843	0.08899		3.91947	0.534773		3.91802	0.065982		3.91833	0.254512
	3.92177	0.089407		3.9228	0.537694		3.92135	0.065982		3.92167	0.251353
	3.9251	0.089765		3.92613	0.541866		3.92468	0.065982		3.925	0.248611
	3.92843	0.090003		3.92947	0.547469		3.92802	0.066102		3.92833	0.246167
	3.93177	0.090122		3.9328	0.554681		3.93135	0.066221		3.93167	0.244021
	3.9351	0.090122		3.93613	0.563681		3.93468	0.066459		3.935	0.242114
	3.93843	0.090063		3.93947	0.574768		3.93802	0.066757		3.93833	0.240445
	3.94177	0.090003		3.9428	0.588298		3.94135	0.067174		3.94167	0.238955
	3.9451	0.089943		3.94613	0.60457		3.94468	0.067651		3.945	0.237525
	3.94843	0.089943		3.94947	0.624061		3.94802	0.068188		3.94833	0.236273
	3.95177	0.090063		3.9528	0.647306		3.95135	0.068724		3.95167	0.23514
	3.9551	0.090241		3.95613	0.674903		3.95468	0.069261		3.955	0.234067
	3.95843	0.090599		3.95947	0.707448		3.95802	0.069797		3.95833	0.233054
	3.96177	0.091016		3.9628	0.745714		3.96135	0.070214		3.96167	0.23216
	3.9651	0.091553		3.96613	0.790358		3.96468	0.070512		3.965	0.231206
	3.96843	0.092089		3.96947	0.842154		3.96802	0.070691		3.96833	0.230193
	3.97177	0.092685		3.9728	0.901818		3.97135	0.07087		3.97167	0.22918
	3.9751	0.093341		3.97613	0.970006		3.97468	0.07093		3.975	0.228047
	3.97843	0.094056		3.97947	1.04749		3.97802	0.07093		3.97833	0.226915
	3.98177	0.094771		3.9828	1.13475		3.98135	0.07093		3.98167	0.225604
	3.9851	0.095606		3.98613	1.23239		3.98468	0.07087		3.985	0.224292
	3.98843	0.09656		3.98947	1.34069		3.98802	0.07087		3.98833	0.222862
	3.99177	0.097573		3.9928	1.45996		3.99135	0.07093		3.99167	0.221431
	3.9951	0.098765		3.99613	1.59025		3.99468	0.071108		3.995	0.219882
	3.99843	0.100076		3.99947	1.73151		3.99802	0.071347		3.99833	0.218332
	4.00177	0.101507		4.0028	1.88339		4.00135	0.071704		4.00167	0.216782
	4.0051	0.103176		4.00613	2.04539		4.00468	0.072241		4.005	0.215113
	4.00843	0.104964		4.00947	2.21682		4.00802	0.072896		4.00833	0.213385
	4.01177	0.10699		4.0128	2.3967		4.01135	0.073612		4.01167	0.211596
	4.0151	0.109255		4.01613	2.58392		4.01468	0.074387		4.015	0.20963
	4.01843	0.111759		4.01947	2.7771		4.01802	0.075221		4.01833	0.207543
	4.02177	0.114501		4.0228	2.97475		4.02135	0.075996		4.02167	0.205338
	4.0251	0.117481		4.02613	3.17508		4.02468	0.076771		4.025	0.203073
	4.02843	0.120699		4.02947	3.3763		4.02802	0.077486		4.02833	0.200689
	4.03177	0.124097		4.0328	3.57634		4.03135	0.078142		4.03167	0.198245
	4.0351	0.127614		4.03613	3.77327		4.03468	0.078678		4.035	0.195742
	4.03843	0.13113		4.03947	3.96496		4.03802	0.079155		4.03833	0.193298
	4.04177	0.134647		4.0428	4.14944		4.04135	0.079632		4.04167	0.190794
	4.0451	0.137985		4.04613	4.32473		4.04468	0.080049		4.045	0.188351
	4.04843	0.141203		4.04947	4.489		4.04802	0.080466		4.04833	0.185847
	4.05177	0.144184		4.0528	4.64052		4.05135	0.080824		4.05167	0.183463
	4.0551	0.146985		4.05613	4.77797		4.05468	0.081182		4.055	0.181019
	4.05843	0.149488		4.05947	4.89998		4.05802	0.08142		4.05833	0.178576
	4.06177	0.151873		4.0628	5.00572		4.06135	0.081599		4.06167	0.176072
	4.0651	0.153959		4.06613	5.09435		4.06468	0.081718		4.065	0.173569
	4.06843	0.155926		4.06947	5.1654		4.06802	0.081718		4.06833	0.171065
	4.07177	0.157714		4.0728	5.2188		4.07135	0.081539		4.07167	0.168443
	4.0751	0.159323		4.07613	5.25451		4.07468	0.081301		4.075	0.16582
	4.07843	0.160754		4.07947	5.27287		4.07802	0.080884		4.07833	0.163078
	4.08177	0.161886		4.0828	5.2743		4.08135	0.080407		4.08167	0.160336
	4.0851	0.16278		4.08613	5.25957		4.08468	0.07993		4.085	0.157475
	4.08843	0.163376		4.08947	5.22941		4.08802	0.079453		4.08833	0.154555
	4.09177	0.163734		4.0928	5.18495		4.09135	0.079036		4.09167	0.151575
	4.0951	0.163853		4.09613	5.12719		4.09468	0.078619		4.095	0.148594
	4.09843	0.163674		4.09947	5.05739		4.09802	0.07838		4.09833	0.145614
	4.10177	0.163317		4.1028	4.97681		4.10135	0.078201		4.10167	0.142694
	4.1051	0.162721		4.10613	4.88663		4.10468	0.078142		4.105	0.139773
	4.10843	0.161946		4.10947	4.78828		4.10802	0.078082		4.10833	0.136971
	4.11177	0.160992		4.1128	4.68296		4.11135	0.078082		4.11167	0.134289
	4.1151	0.15986		4.11613	4.57197		4.11468	0.078082		4.115	0.131786
	4.11843	0.158489		4.11947	4.45652		4.11802	0.077963		4.11833	0.129461
	4.12177	0.156999		4.1228	4.33767		4.12135	0.077724		4.12167	0.127316
	4.1251	0.15527		4.12613	4.21649		4.12468	0.077367		4.125	0.125408
	4.12843	0.153482		4.12947	4.09401		4.12802	0.07689		4.12833	0.12368
	4.13177	0.151515		4.1328	3.97098		4.13135	0.076354		4.13167	0.12213
	4.1351	0.149488		4.13613	3.84825		4.13468	0.075758		4.135	0.120699
	4.13843	0.147462		4.13947	3.72642		4.13802	0.075102		4.13833	0.119328
	4.14177	0.145495		4.1428	3.60608		4.14135	0.074506		4.14167	0.118077
	4.1451	0.143528		4.14613	3.48765		4.14468	0.073969		4.145	0.116825
	4.14843	0.14174		4.14947	3.3716		4.14802	0.073493		4.14833	0.115573
	4.15177	0.140011		4.1528	3.25823		4.15135	0.073135		4.15167	0.114322
	4.1551	0.138402		4.15613	3.14778		4.15468	0.072837		4.155	0.11307
	4.15843	0.136852		4.15947	3.04043		4.15802	0.072658		4.15833	0.111818
	4.16177	0.135362		4.1628	2.93642		4.16135	0.072479		4.16167	0.110567
	4.1651	0.133872		4.16613	2.83575		4.16468	0.07242		4.165	0.109315
	4.16843	0.132442		4.16947	2.7386		4.16802	0.0723		4.16833	0.108004
	4.17177	0.130892		4.1728	2.6449		4.17135	0.072181		4.17167	0.106752
	4.1751	0.129342		4.17613	2.55471		4.17468	0.072062		4.175	0.10556
	4.17843	0.127733		4.17947	2.46805		4.17802	0.071883		4.17833	0.104308
	4.18177	0.126004		4.1828	2.38484		4.18135	0.071645		4.18167	0.103116
	4.1851	0.124276		4.18613	2.30503		4.18468	0.071406		4.185	0.101984
	4.18843	0.122488		4.18947	2.22856		4.18802	0.071168		4.18833	0.10097
	4.19177	0.120699		4.1928	2.15536		4.19135	0.07093		4.19167	0.099957
	4.1951	0.118911		4.19613	2.08545		4.19468	0.070691		4.195	0.099123
	4.19843	0.117123		4.19947	2.01857		4.19802	0.070453		4.19833	0.098288
	4.20177	0.115335		4.2028	1.95485		4.20135	0.070333		4.20167	0.097573
	4.2051	0.113606		4.20613	1.89412		4.20468	0.070214		4.205	0.096917
	4.20843	0.111997		4.20947	1.83624		4.20802	0.070155		4.20833	0.096262
	4.21177	0.110447		4.2128	1.78123		4.21135	0.070155		4.21167	0.095725
	4.2151	0.108957		4.21613	1.72895		4.21468	0.070274		4.215	0.095248
	4.21843	0.107527		4.21947	1.67924		4.21802	0.070393		4.21833	0.094771
	4.22177	0.106275		4.2228	1.63215		4.22135	0.070632		4.22167	0.094295
	4.2251	0.105083		4.22613	1.58751		4.22468	0.07093		4.225	0.093818
	4.22843	0.10401		4.22947	1.54531		4.22802	0.071287		4.22833	0.093281
	4.23177	0.103056		4.2328	1.50544		4.23135	0.071585		4.23167	0.092685
	4.2351	0.102222		4.23613	1.46782		4.23468	0.071943		4.235	0.09203
	4.23843	0.101447		4.23947	1.43254		4.23802	0.0723		4.23833	0.091314
	4.24177	0.100791		4.2428	1.39952		4.24135	0.072658		4.24167	0.09042
	4.2451	0.100136		4.24613	1.3687		4.24468	0.072956		4.245	0.089467
	4.24843	0.09954		4.24947	1.34021		4.24802	0.073254		4.24833	0.088453
	4.25177	0.098944		4.2528	1.31404		4.25135	0.073612		4.25167	0.087321
	4.2551	0.098407		4.25613	1.2902		4.25468	0.073969		4.255	0.086188
	4.25843	0.097871		4.25947	1.26869		4.25802	0.074387		4.25833	0.085056
	4.26177	0.097334		4.2628	1.24967		4.26135	0.074923		4.26167	0.083983
	4.2651	0.096858		4.26613	1.2331		4.26468	0.075519		4.265	0.08297
	4.26843	0.096381		4.26947	1.21915		4.26802	0.076234		4.26833	0.082135
	4.27177	0.095904		4.2728	1.20789		4.27135	0.077009		4.27167	0.08136
	4.2751	0.095546		4.27613	1.19942		4.27468	0.077844		4.275	0.080764
	4.27843	0.095129		4.27947	1.19382		4.27802	0.078678		4.27833	0.080228
	4.28177	0.094771		4.2828	1.1912		4.28135	0.079632		4.28167	0.07987
	4.2851	0.094414		4.28613	1.19156		4.28468	0.080645		4.285	0.079513
	4.28843	0.094116		4.28947	1.19495		4.28802	0.081658		4.28833	0.079215
	4.29177	0.093758		4.2928	1.20145		4.29135	0.082731		4.29167	0.078917
	4.2951	0.0934		4.29613	1.21099		4.29468	0.083864		4.295	0.078559
	4.29843	0.093102		4.29947	1.22356		4.29802	0.084996		4.29833	0.078201
	4.30177	0.092745		4.3028	1.23894		4.30135	0.086248		4.30167	0.077665
	4.3051	0.092447		4.30613	1.25718		4.30468	0.08744		4.305	0.077128
	4.30843	0.092149		4.30947	1.27792		4.30802	0.088692		4.30833	0.076532
	4.31177	0.091851		4.3128	1.30111		4.31135	0.089943		4.31167	0.075936
	4.3151	0.091553		4.31613	1.32644		4.31468	0.091076		4.315	0.07534
	4.31843	0.091314		4.31947	1.35362		4.31802	0.092089		4.31833	0.074744
	4.32177	0.091076		4.3228	1.38229		4.32135	0.093043		4.32167	0.074208
	4.3251	0.090837		4.32613	1.41215		4.32468	0.093818		4.325	0.073791
	4.32843	0.090718		4.32947	1.44279		4.32802	0.094533		4.32833	0.073433
	4.33177	0.090599		4.3328	1.47378		4.33135	0.095129		4.33167	0.073195
	4.3351	0.090599		4.33613	1.50484		4.33468	0.095606		4.335	0.073075
	4.33843	0.090718		4.33947	1.53547		4.33802	0.095963		4.33833	0.073016
	4.34177	0.090957		4.3428	1.56534		4.34135	0.096202		4.34167	0.073016
	4.3451	0.091314		4.34613	1.59407		4.34468	0.096321		4.345	0.073075
	4.34843	0.091732		4.34947	1.62137		4.34802	0.096381		4.34833	0.073195
	4.35177	0.092268		4.3528	1.64688		4.35135	0.096321		4.35167	0.073314
	4.3551	0.092864		4.35613	1.6703		4.35468	0.096142		4.355	0.073493
	4.35843	0.09352		4.35947	1.69128		4.35802	0.095904		4.35833	0.073791
	4.36177	0.094056		4.3628	1.7097		4.36135	0.095606		4.36167	0.074148
	4.3651	0.094593		4.36613	1.7252		4.36468	0.095189		4.365	0.074625
	4.36843	0.09501		4.36947	1.73765		4.36802	0.094831		4.36833	0.075281
	4.37177	0.095308		4.3728	1.74701		4.37135	0.094414		4.37167	0.076056
	4.3751	0.095487		4.37613	1.75315		4.37468	0.093997		4.375	0.07695
	4.37843	0.095606		4.37947	1.75613		4.37802	0.09352		4.37833	0.078022
	4.38177	0.095606		4.3828	1.75589		4.38135	0.093043		4.38167	0.079095
	4.3851	0.095546		4.38613	1.75262		4.38468	0.092447		4.385	0.080287
	4.38843	0.095487		4.38947	1.74636		4.38802	0.091791		4.38833	0.081539
	4.39177	0.095427		4.3928	1.7373		4.39135	0.091076		4.39167	0.082791
	4.3951	0.095487		4.39613	1.72561		4.39468	0.090182		4.395	0.084043
	4.39843	0.095546		4.39947	1.71143		4.39802	0.089228		4.39833	0.085294
	4.40177	0.095606		4.4028	1.69504		4.40135	0.088155		4.40167	0.086546
	4.4051	0.095725		4.40613	1.6765		4.40468	0.087023		4.405	0.087857
	4.40843	0.095844		4.40947	1.656		4.40802	0.085831		4.40833	0.089169
	4.41177	0.095904		4.4128	1.63382		4.41135	0.084698		4.41167	0.09048
	4.4151	0.095904		4.41613	1.6101		4.41468	0.083566		4.415	0.091791
	4.41843	0.095785		4.41947	1.58507		4.41802	0.082493		4.41833	0.093102
	4.42177	0.095606		4.4228	1.55878		4.42135	0.08142		4.42167	0.094414
	4.4251	0.095248		4.42613	1.53154		4.42468	0.080407		4.425	0.095725
	4.42843	0.094891		4.42947	1.50353		4.42802	0.079453		4.42833	0.096917
	4.43177	0.094414		4.4328	1.47498		4.43135	0.078559		4.43167	0.09799
	4.4351	0.093937		4.43613	1.44601		4.43468	0.077724		4.435	0.099003
	4.43843	0.09352		4.43947	1.41686		4.43802	0.07683		4.43833	0.099838
	4.44177	0.093102		4.4428	1.38777		4.44135	0.075877		4.44167	0.100553
	4.4451	0.092685		4.44613	1.35881		4.44468	0.074923		4.445	0.101149
	4.44843	0.092387		4.44947	1.33014		4.44802	0.073969		4.44833	0.101626
	4.45177	0.092149		4.4528	1.302		4.45135	0.072956		4.45167	0.101984
	4.4551	0.09191		4.45613	1.27447		4.45468	0.072002		4.455	0.102222
	4.45843	0.091791		4.45947	1.2477		4.45802	0.071049		4.45833	0.102401
	4.46177	0.091791		4.4628	1.22166		4.46135	0.070155		4.46167	0.10252
	4.4651	0.091791		4.46613	1.19656		4.46468	0.06932		4.465	0.102639
	4.46843	0.09197		4.46947	1.17236		4.46802	0.068605		4.46833	0.102758
	4.47177	0.092149		4.4728	1.14918		4.47135	0.067949		4.47167	0.102758
	4.4751	0.092506		4.47613	1.12706		4.47468	0.067413		4.475	0.102699
	4.47843	0.092983		4.47947	1.10608		4.47802	0.066936		4.47833	0.10252
	4.48177	0.093579		4.4828	1.08635		4.48135	0.066519		4.48167	0.102162
	4.4851	0.094235		4.48613	1.06794		4.48468	0.066102		4.485	0.101686
	4.48843	0.095069		4.48947	1.05089		4.48802	0.065744		4.48833	0.101089
	4.49177	0.096023		4.4928	1.03539		4.49135	0.065327		4.49167	0.100374
	4.4951	0.097156		4.49613	1.0215		4.49468	0.064909		4.495	0.09954
	4.49843	0.098467		4.49947	1.00941		4.49802	0.064433		4.49833	0.098646
	4.50177	0.099957		4.5028	0.999272		4.50135	0.064015		4.50167	0.097692
	4.5051	0.101686		4.50613	0.991225		4.50468	0.063539		4.505	0.096798
	4.50843	0.103652		4.50947	0.985563		4.50802	0.063121		4.50833	0.095904
	4.51177	0.105917		4.5128	0.982523		4.51135	0.062644		4.51167	0.095129
	4.5151	0.10848		4.51613	0.982225		4.51468	0.062227		4.515	0.094473
	4.51843	0.111401		4.51947	0.985026		4.51802	0.06187		4.51833	0.093818
	4.52177	0.11456		4.5228	0.991225		4.52135	0.061512		4.52167	0.093162
	4.5251	0.118077		4.52613	1.001		4.52468	0.061274		4.525	0.092506
	4.52843	0.121891		4.52947	1.01483		4.52802	0.061095		4.52833	0.091851
	4.53177	0.126004		4.5328	1.03283		4.53135	0.061035		4.53167	0.091136
	4.5351	0.130415		4.53613	1.05542		4.53468	0.061095		4.535	0.090361
	4.53843	0.135124		4.53947	1.08284		4.53802	0.061274		4.53833	0.089586
	4.54177	0.140071		4.5428	1.11544		4.54135	0.061572		4.54167	0.088811
	4.5451	0.145197		4.54613	1.15341		4.54468	0.061929		4.545	0.087976
	4.54843	0.150561		4.54947	1.1971		4.54802	0.062287		4.54833	0.087202
	4.55177	0.156045		4.5528	1.24675		4.55135	0.062704		4.55167	0.086486
	4.5551	0.161648		4.55613	1.30242		4.55468	0.063062		4.555	0.085831
	4.55843	0.16731		4.55947	1.36429		4.55802	0.063419		4.55833	0.085294
	4.56177	0.172973		4.5628	1.43236		4.56135	0.063658		4.56167	0.084817
	4.5651	0.178635		4.56613	1.50663		4.56468	0.063896		4.565	0.0844
	4.56843	0.184178		4.56947	1.58703		4.56802	0.064015		4.56833	0.084043
	4.57177	0.189662		4.5728	1.67328		4.57135	0.064135		4.57167	0.083685
	4.5751	0.195026		4.57613	1.76513		4.57468	0.064254		4.575	0.083327
	4.57843	0.200272		4.57947	1.86223		4.57802	0.064373		4.57833	0.08297
	4.58177	0.205338		4.5828	1.96409		4.58135	0.064492		4.58167	0.082552
	4.5851	0.210226		4.58613	2.07013		4.58468	0.064671		4.585	0.082135
	4.58843	0.214875		4.58947	2.1798		4.58802	0.064909		4.58833	0.081658
	4.59177	0.219285		4.5928	2.29245		4.59135	0.065148		4.59167	0.081182
	4.5951	0.223398		4.59613	2.40725		4.59468	0.065327		4.595	0.080585
	4.59843	0.227153		4.59947	2.52354		4.59802	0.065506		4.59833	0.079989
	4.60177	0.230551		4.6028	2.64037		4.60135	0.065684		4.60167	0.079393
	4.6051	0.233591		4.60613	2.75695		4.60468	0.065863		4.605	0.078738
	4.60843	0.236213		4.60947	2.87259		4.60802	0.065982		4.60833	0.078142
	4.61177	0.238419		4.6128	2.98631		4.61135	0.066102		4.61167	0.077546
	4.6151	0.240266		4.61613	3.09741		4.61468	0.06628		4.615	0.077009
	4.61843	0.241697		4.61947	3.20512		4.61802	0.066459		4.61833	0.076532
	4.62177	0.24271		4.6228	3.30883		4.62135	0.066698		4.62167	0.076175
	4.6251	0.243366		4.62613	3.40784		4.62468	0.066996		4.625	0.075877
	4.62843	0.243664		4.62947	3.50171		4.62802	0.067353		4.62833	0.075758
	4.63177	0.243664		4.6328	3.58993		4.63135	0.06777		4.63167	0.075698
	4.6351	0.243306		4.63613	3.67212		4.63468	0.068247		4.635	0.075758
	4.63843	0.242651		4.63947	3.74818		4.63802	0.068784		4.63833	0.075877
	4.64177	0.241697		4.6428	3.81786		4.64135	0.06938		4.64167	0.076056
	4.6451	0.240564		4.64613	3.88122		4.64468	0.069976		4.645	0.076234
	4.64843	0.239134		4.64947	3.93826		4.64802	0.070572		4.64833	0.076413
	4.65177	0.237584		4.6528	3.98922		4.65135	0.071049		4.65167	0.076592
	4.6551	0.235796		4.65613	4.0344		4.65468	0.071406		4.655	0.076711
	4.65843	0.233948		4.65947	4.07404		4.65802	0.071585		4.65833	0.076771
	4.66177	0.231922		4.6628	4.10867		4.66135	0.071526		4.66167	0.076771
	4.6651	0.229836		4.66613	4.13865		4.66468	0.071228		4.665	0.076771
	4.66843	0.22769		4.66947	4.1644		4.66802	0.070632		4.66833	0.076711
	4.67177	0.225425		4.6728	4.18633		4.67135	0.069797		4.67167	0.076652
	4.6751	0.2231		4.67613	4.20499		4.67468	0.068784		4.675	0.076652
	4.67843	0.220656		4.67947	4.22072		4.67802	0.067651		4.67833	0.076771
	4.68177	0.218153		4.6828	4.2339		4.68135	0.066519		4.68167	0.07695
	4.6851	0.21565		4.68613	4.24492		4.68468	0.065446		4.685	0.077248
	4.68843	0.213087		4.68947	4.2541		4.68802	0.064552		4.68833	0.077605
	4.69177	0.210524		4.6928	4.26161		4.69135	0.063837		4.69167	0.078022
	4.6951	0.207961		4.69613	4.26781		4.69468	0.06336		4.695	0.078559
	4.69843	0.205398		4.69947	4.27264		4.69802	0.063062		4.69833	0.079155
	4.70177	0.202835		4.7028	4.27634		4.70135	0.063062		4.70167	0.079751
	4.7051	0.200331		4.70613	4.27878		4.70468	0.063121		4.705	0.080347
	4.70843	0.197828		4.70947	4.27997		4.70802	0.0633		4.70833	0.080943
	4.71177	0.195384		4.7128	4.27973		4.71135	0.063539		4.71167	0.08148
	4.7151	0.19294		4.71613	4.27782		4.71468	0.063658		4.715	0.081956
	4.71843	0.190616		4.71947	4.27407		4.71802	0.063717		4.71833	0.082374
	4.72177	0.188351		4.7228	4.26823		4.72135	0.063717		4.72167	0.082731
	4.7251	0.186145		4.72613	4.26		4.72468	0.063598		4.725	0.083089
	4.72843	0.184		4.72947	4.2491		4.72802	0.06336		4.72833	0.083327
	4.73177	0.181913		4.7328	4.23527		4.73135	0.063002		4.73167	0.083506
	4.7351	0.179887		4.73613	4.21828		4.73468	0.062525		4.735	0.083566
	4.73843	0.17786		4.73947	4.19778		4.73802	0.061989		4.73833	0.083506
	4.74177	0.175834		4.7428	4.17358		4.74135	0.061452		4.74167	0.083387
	4.7451	0.173748		4.74613	4.14562		4.74468	0.060916		4.745	0.083148
	4.74843	0.171542		4.74947	4.11367		4.74802	0.060439		4.74833	0.08285
	4.75177	0.169277		4.7528	4.07773		4.75135	0.060022		4.75167	0.082552
	4.7551	0.166893		4.75613	4.03786		4.75468	0.059724		4.755	0.082135
	4.75843	0.16439		4.75947	3.99405		4.75802	0.059545		4.75833	0.081718
	4.76177	0.161767		4.7628	3.94642		4.76135	0.059485		4.76167	0.081301
	4.7651	0.159204		4.76613	3.89522		4.76468	0.059485		4.765	0.080824
	4.76843	0.156581		4.76947	3.84069		4.76802	0.059545		4.76833	0.080407
	4.77177	0.154018		4.7728	3.78293		4.77135	0.059605		4.77167	0.07987
	4.7751	0.151455		4.77613	3.72231		4.77468	0.059605		4.775	0.079274
	4.77843	0.149012		4.77947	3.65907		4.77802	0.059426		4.77833	0.078619
	4.78177	0.146627		4.7828	3.59339		4.78135	0.059128		4.78167	0.077903
	4.7851	0.144303		4.78613	3.52562		4.78468	0.058711		4.785	0.077069
	4.78843	0.142097		4.78947	3.456		4.78802	0.058115		4.78833	0.076234
	4.79177	0.139892		4.7928	3.38483		4.79135	0.057399		4.79167	0.07534
	4.7951	0.137746		4.79613	3.31235		4.79468	0.056624		4.795	0.074446
	4.79843	0.135541		4.79947	3.23886		4.79802	0.05585		4.79833	0.073612
	4.80177	0.133395		4.8028	3.16459		4.80135	0.055075		4.80167	0.072777
	4.8051	0.13119		4.80613	3.0899		4.80468	0.054479		4.805	0.072002
	4.80843	0.128984		4.80947	3.01504		4.80802	0.054002		4.80833	0.071228
	4.81177	0.126779		4.8128	2.9403		4.81135	0.053644		4.81167	0.070512
	4.8151	0.124633		4.81613	2.86585		4.81468	0.053465		4.815	0.069737
	4.81843	0.122547		4.81947	2.79188		4.81802	0.053406		4.81833	0.068903
	4.82177	0.120521		4.8228	2.71869		4.82135	0.053465		4.82167	0.068009
	4.8251	0.118613		4.82613	2.64633		4.82468	0.053644		4.825	0.066996
	4.82843	0.116825		4.82947	2.57492		4.82802	0.053883		4.82833	0.065923
	4.83177	0.115216		4.8328	2.50471		4.83135	0.05424		4.83167	0.06485
	4.8351	0.113666		4.83613	2.4358		4.83468	0.054598		4.835	0.063777
	4.83843	0.112176		4.83947	2.36821		4.83802	0.055075		4.83833	0.062823
	4.84177	0.110805		4.8428	2.30205		4.84135	0.055552		4.84167	0.06187
	4.8451	0.109494		4.84613	2.2375		4.84468	0.056028		4.845	0.061095
	4.84843	0.108123		4.84947	2.17456		4.84802	0.056505		4.84833	0.060439
	4.85177	0.106871		4.8528	2.11334		4.85135	0.056922		4.85167	0.059962
	4.8551	0.1055		4.85613	2.05386		4.85468	0.05728		4.855	0.059545
	4.85843	0.104189		4.85947	1.99616		4.85802	0.057518		4.85833	0.059247
	4.86177	0.102758		4.8628	1.94025		4.86135	0.057578		4.86167	0.059009
	4.8651	0.101388		4.86613	1.88619		4.86468	0.057518		4.865	0.05877
	4.86843	0.099957		4.86947	1.83397		4.86802	0.05728		4.86833	0.058532
	4.87177	0.098586		4.8728	1.78355		4.87135	0.056922		4.87167	0.058174
	4.8751	0.097215		4.87613	1.73491		4.87468	0.056446		4.875	0.057757
	4.87843	0.095844		4.87947	1.68806		4.87802	0.05585		4.87833	0.057161
	4.88177	0.094533		4.8828	1.643		4.88135	0.055194		4.88167	0.056446
	4.8851	0.093281		4.88613	1.59955		4.88468	0.054538		4.885	0.055611
	4.88843	0.092089		4.88947	1.55771		4.88802	0.054002		4.88833	0.054598
	4.89177	0.090957		4.8928	1.51747		4.89135	0.053525		4.89167	0.053525
	4.8951	0.089884		4.89613	1.47867		4.89468	0.053108		4.895	0.052392
	4.89843	0.088751		4.89947	1.4413		4.89802	0.05281		4.89833	0.0512
	4.90177	0.087678		4.9028	1.40518		4.90135	0.052631		4.90167	0.050068
	4.9051	0.086606		4.90613	1.37037		4.90468	0.052512		4.905	0.048995
	4.90843	0.085533		4.90947	1.33675		4.90802	0.052452		4.90833	0.048041
	4.91177	0.084519		4.9128	1.30433		4.91135	0.052392		4.91167	0.047266
	4.9151	0.083506		4.91613	1.2731		4.91468	0.052273		4.915	0.04667
	4.91843	0.082612		4.91947	1.243		4.91802	0.052214		4.91833	0.046253
	4.92177	0.081778		4.9228	1.21403		4.92135	0.052094		4.92167	0.045955
	4.9251	0.081122		4.92613	1.18613		4.92468	0.051975		4.925	0.045776
	4.92843	0.080526		4.92947	1.15931		4.92802	0.051856		4.92833	0.045598
	4.93177	0.080109		4.9328	1.13356		4.93135	0.051737		4.93167	0.045478
	4.9351	0.07987		4.93613	1.10882		4.93468	0.051618		4.935	0.0453
	4.93843	0.079632		4.93947	1.08504		4.93802	0.051498		4.93833	0.045002
	4.94177	0.079513		4.9428	1.06215		4.94135	0.051379		4.94167	0.044584
	4.9451	0.079393		4.94613	1.0401		4.94468	0.05126		4.945	0.044107
	4.94843	0.079274		4.94947	1.01882		4.94802	0.051141		4.94833	0.043571
	4.95177	0.079036		4.9528	0.998259		4.95135	0.050902		4.95167	0.042915
	4.9551	0.078678		4.95613	0.978351		4.95468	0.050604		4.955	0.04226
	4.95843	0.078201		4.95947	0.959098		4.95802	0.050306		4.95833	0.041664
	4.96177	0.077605		4.9628	0.940382		4.96135	0.049949		4.96167	0.041068
	4.9651	0.07695		4.96613	0.922263		4.96468	0.049591		4.965	0.040591
	4.96843	0.076234		4.96947	0.904679		4.96802	0.049233		4.96833	0.040233
	4.97177	0.0754		4.9728	0.887573		4.97135	0.048935		4.97167	0.039876
	4.9751	0.074625		4.97613	0.870943		4.97468	0.048697		4.975	0.039637
	4.97843	0.07385		4.97947	0.85479		4.97802	0.048518		4.97833	0.039399
	4.98177	0.073075		4.9828	0.839055		4.98135	0.048399		4.98167	0.03916
	4.9851	0.07236		4.98613	0.823796		4.98468	0.048339		4.985	0.038981
	4.98843	0.071764		4.98947	0.809014		4.98802	0.048339		4.98833	0.038743
	4.99177	0.071108		4.9928	0.794649		4.99135	0.048399		4.99167	0.038505
	4.9951	0.070572		4.99613	0.780761		4.99468	0.048518		4.995	0.038207
	4.99843	0.069976		4.99947	0.76735		4.99802	0.048637		4.99833	0.037968
	5.00177	0.069439		5.0028	0.754476		5.00135	0.048876		5.00167	0.03767
	5.0051	0.068903		5.00613	0.742137		5.00468	0.049114		5.005	0.037432
	5.00843	0.068307		5.00947	0.730395		5.00802	0.049353		5.00833	0.037253
	5.01177	0.06777		5.0128	0.719249		5.01135	0.049651		5.01167	0.037193
	5.0151	0.067174		5.01613	0.70864		5.01468	0.049949		5.015	0.037193
	5.01843	0.066638		5.01947	0.698626		5.01802	0.050187		5.01833	0.037253
	5.02177	0.066102		5.0228	0.689209		5.02135	0.050366		5.02167	0.037372
	5.0251	0.065565		5.02613	0.680327		5.02468	0.050426		5.025	0.037491
	5.02843	0.065088		5.02947	0.671983		5.02802	0.050366		5.02833	0.037551
	5.03177	0.064671		5.0328	0.664115		5.03135	0.050187		5.03167	0.037611
	5.0351	0.064194		5.03613	0.656664		5.03468	0.049949		5.035	0.037611
	5.03843	0.063777		5.03947	0.649691		5.03802	0.049591		5.03833	0.037432
	5.04177	0.06336		5.0428	0.643134		5.04135	0.049174		5.04167	0.037134
	5.0451	0.062943		5.04613	0.637054		5.04468	0.048697		5.045	0.036776
	5.04843	0.062525		5.04947	0.631452		5.04802	0.04828		5.04833	0.036418
	5.05177	0.062108		5.0528	0.626385		5.05135	0.047982		5.05167	0.036001
	5.0551	0.06175		5.05613	0.621974		5.05468	0.047743		5.055	0.035703
	5.05843	0.061333		5.05947	0.6181		5.05802	0.047624		5.05833	0.035405
	5.06177	0.061035		5.0628	0.614941		5.06135	0.047684		5.06167	0.035286
	5.0651	0.060737		5.06613	0.612497		5.06468	0.047803		5.065	0.035286
	5.06843	0.060439		5.06947	0.610769		5.06802	0.047982		5.06833	0.035286
	5.07177	0.06026		5.0728	0.609815		5.07135	0.04828		5.07167	0.035405
	5.0751	0.060081		5.07613	0.609636		5.07468	0.048697		5.075	0.035524
	5.07843	0.059903		5.07947	0.610292		5.07802	0.049055		5.07833	0.035644
	5.08177	0.059783		5.0828	0.611663		5.08135	0.049472		5.08167	0.035763
	5.0851	0.059724		5.08613	0.613928		5.08468	0.049829		5.085	0.035822
	5.08843	0.059664		5.08947	0.617027		5.08802	0.050187		5.08833	0.035822
	5.09177	0.059605		5.0928	0.621021		5.09135	0.050545		5.09167	0.035942
	5.0951	0.059545		5.09613	0.625789		5.09468	0.050902		5.095	0.036061
	5.09843	0.059545		5.09947	0.631392		5.09802	0.0512		5.09833	0.03624
	5.10177	0.059605		5.1028	0.63777		5.10135	0.051439		5.10167	0.036538
	5.1051	0.059664		5.10613	0.644922		5.10468	0.051737		5.105	0.036895
	5.10843	0.059843		5.10947	0.65273		5.10802	0.051975		5.10833	0.037313
	5.11177	0.060022		5.1128	0.661314		5.11135	0.052214		5.11167	0.037789
	5.1151	0.060201		5.11613	0.670493		5.11468	0.052512		5.115	0.038266
	5.11843	0.06038		5.11947	0.680208		5.11802	0.05275		5.11833	0.038743
	5.12177	0.060618		5.1228	0.690579		5.12135	0.053048		5.12167	0.03922
	5.1251	0.060856		5.12613	0.701427		5.12468	0.053346		5.125	0.039577
	5.12843	0.061035		5.12947	0.712812		5.12802	0.053644		5.12833	0.039876
	5.13177	0.061274		5.1328	0.724673		5.13135	0.054002		5.13167	0.040114
	5.1351	0.061452		5.13613	0.736952		5.13468	0.054419		5.135	0.040352
	5.13843	0.061691		5.13947	0.749528		5.13802	0.054777		5.13833	0.040591
	5.14177	0.06187		5.1428	0.762403		5.14135	0.055194		5.14167	0.04077
	5.1451	0.062108		5.14613	0.775456		5.14468	0.055552		5.145	0.041008
	5.14843	0.062346		5.14947	0.78851		5.14802	0.055909		5.14833	0.041246
	5.15177	0.062644		5.1528	0.801504		5.15135	0.056267		5.15167	0.041485
	5.1551	0.062943		5.15613	0.814259		5.15468	0.056446		5.155	0.041723
	5.15843	0.063181		5.15947	0.826597		5.15802	0.056624		5.15833	0.041962
	5.16177	0.06336		5.1628	0.838459		5.16135	0.056684		5.16167	0.0422
	5.1651	0.063479		5.16613	0.849605		5.16468	0.056684		5.165	0.042379
	5.16843	0.063539		5.16947	0.859976		5.16802	0.056624		5.16833	0.042439
	5.17177	0.063479		5.1728	0.869393		5.17135	0.056565		5.17167	0.042439
	5.1751	0.06336		5.17613	0.877857		5.17468	0.056565		5.175	0.042439
	5.17843	0.063121		5.17947	0.885189		5.17802	0.056565		5.17833	0.042319
	5.18177	0.062823		5.1828	0.891328		5.18135	0.056684		5.18167	0.04226
	5.1851	0.062466		5.18613	0.896215		5.18468	0.056922		5.185	0.04226
	5.18843	0.062108		5.18947	0.899911		5.18802	0.05722		5.18833	0.04226
	5.19177	0.06175		5.1928	0.902295		5.19135	0.057638		5.19167	0.042439
	5.1951	0.061393		5.19613	0.903487		5.19468	0.058174		5.195	0.042796
	5.19843	0.061095		5.19947	0.903487		5.19802	0.058711		5.19833	0.043273
	5.20177	0.060856		5.2028	0.902355		5.20135	0.059366		5.20167	0.043869
	5.2051	0.060678		5.20613	0.90003		5.20468	0.060022		5.205	0.044584
	5.20843	0.060499		5.20947	0.896573		5.20802	0.060678		5.20833	0.045359
	5.21177	0.060439		5.2128	0.891984		5.21135	0.061274		5.21167	0.046074
	5.2151	0.06038		5.21613	0.886321		5.21468	0.06175		5.215	0.046849
	5.21843	0.06032		5.21947	0.879586		5.21802	0.062168		5.21833	0.047505
	5.22177	0.06026		5.2228	0.871778		5.22135	0.062466		5.22167	0.048101
	5.2251	0.06026		5.22613	0.862896		5.22468	0.062585		5.225	0.048578
	5.22843	0.060141		5.22947	0.853121		5.22802	0.062525		5.22833	0.048876
	5.23177	0.060022		5.2328	0.842392		5.23135	0.062346		5.23167	0.049055
	5.2351	0.059843		5.23613	0.830948		5.23468	0.061989		5.235	0.049114
	5.23843	0.059605		5.23947	0.818789		5.23802	0.061512		5.23833	0.049055
	5.24177	0.059247		5.2428	0.806093		5.24135	0.060976		5.24167	0.048935
	5.2451	0.058889		5.24613	0.79298		5.24468	0.06032		5.245	0.048697
	5.24843	0.058472		5.24947	0.77939		5.24802	0.059605		5.24833	0.048399
	5.25177	0.057995		5.2528	0.765502		5.25135	0.058949		5.25167	0.048101
	5.2551	0.057518		5.25613	0.751317		5.25468	0.058234		5.255	0.047863
	5.25843	0.057042		5.25947	0.736892		5.25802	0.057638		5.25833	0.047565
	5.26177	0.056624		5.2628	0.722229		5.26135	0.056982		5.26167	0.047386
	5.2651	0.056267		5.26613	0.707448		5.26468	0.056505		5.265	0.047207
	5.26843	0.055909		5.26947	0.692487		5.26802	0.056028		5.26833	0.047088
	5.27177	0.055611		5.2728	0.677466		5.27135	0.05573		5.27167	0.047028
	5.2751	0.055254		5.27613	0.662446		5.27468	0.055432		5.275	0.047028
	5.27843	0.054955		5.27947	0.647545		5.27802	0.055254		5.27833	0.047028
	5.28177	0.054598		5.2828	0.632763		5.28135	0.055075		5.28167	0.047028
	5.2851	0.0543		5.28613	0.61816		5.28468	0.054955		5.285	0.047028
	5.28843	0.053883		5.28947	0.603855		5.28802	0.054896		5.28833	0.046968
	5.29177	0.053465		5.2928	0.589788		5.29135	0.054836		5.29167	0.046909
	5.2951	0.053048		5.29613	0.57596		5.29468	0.054777		5.295	0.046909
	5.29843	0.052631		5.29947	0.56237		5.29802	0.054717		5.29833	0.046849
	5.30177	0.052214		5.3028	0.549078		5.30135	0.054717		5.30167	0.04679
	5.3051	0.051916		5.30613	0.536025		5.30468	0.054657		5.305	0.046849
	5.30843	0.051677		5.30947	0.52321		5.30802	0.054657		5.30833	0.046909
	5.31177	0.051498		5.3128	0.510693		5.31135	0.054717		5.31167	0.047088
	5.3151	0.051379		5.31613	0.498414		5.31468	0.054836		5.315	0.047326
	5.31843	0.05132		5.31947	0.486493		5.31802	0.055015		5.31833	0.047684
	5.32177	0.05132		5.3228	0.47487		5.32135	0.055194		5.32167	0.048041
	5.3251	0.051439		5.32613	0.463665		5.32468	0.055432		5.325	0.048459
	5.32843	0.051498		5.32947	0.452876		5.32802	0.05573		5.32833	0.048816
	5.33177	0.051558		5.3328	0.442445		5.33135	0.056148		5.33167	0.049233
	5.3351	0.051618		5.33613	0.432372		5.33468	0.056565		5.335	0.049531
	5.33843	0.051558		5.33947	0.422597		5.33802	0.057042		5.33833	0.049829
	5.34177	0.051498		5.3428	0.413179		5.34135	0.057578		5.34167	0.050068
	5.3451	0.05132		5.34613	0.40406		5.34468	0.058174		5.345	0.050306
	5.34843	0.051081		5.34947	0.395179		5.34802	0.058949		5.34833	0.050485
	5.35177	0.050783		5.3528	0.386536		5.35135	0.059783		5.35167	0.050724
	5.3551	0.050485		5.35613	0.378191		5.35468	0.060737		5.355	0.050902
	5.35843	0.050128		5.35947	0.370145		5.35802	0.06181		5.35833	0.051141
	5.36177	0.049829		5.3628	0.362337		5.36135	0.062943		5.36167	0.05126
	5.3651	0.049591		5.36613	0.354826		5.36468	0.064015		5.365	0.051379
	5.36843	0.049472		5.36947	0.347674		5.36802	0.065029		5.36833	0.051439
	5.37177	0.049412		5.3728	0.34076		5.37135	0.065923		5.37167	0.05132
	5.3751	0.049472		5.37613	0.334203		5.37468	0.066698		5.375	0.051141
	5.37843	0.049651		5.37947	0.327885		5.37802	0.067294		5.37833	0.050843
	5.38177	0.050008		5.3828	0.321805		5.38135	0.06783		5.38167	0.050426
	5.3851	0.050485		5.38613	0.315905		5.38468	0.068188		5.385	0.049889
	5.38843	0.051141		5.38947	0.310183		5.38802	0.068426		5.38833	0.049353
	5.39177	0.051975		5.3928	0.304639		5.39135	0.068605		5.39167	0.048757
	5.3951	0.052869		5.39613	0.299215		5.39468	0.068784		5.395	0.048101
	5.39843	0.053883		5.39947	0.29397		5.39802	0.068903		5.39833	0.047445
	5.40177	0.055015		5.4028	0.288785		5.40135	0.068963		5.40167	0.04673
	5.4051	0.056148		5.40613	0.283778		5.40468	0.068963		5.405	0.045955
	5.40843	0.05722		5.40947	0.27889		5.40802	0.068843		5.40833	0.04524
	5.41177	0.058234		5.4128	0.274181		5.41135	0.068665		5.41167	0.044465
	5.4151	0.059068		5.41613	0.269592		5.41468	0.068426		5.415	0.043631
	5.41843	0.059783		5.41947	0.265181		5.41802	0.068128		5.41833	0.042915
	5.42177	0.06032		5.4228	0.26083		5.42135	0.06783		5.42167	0.0422
	5.4251	0.060678		5.42613	0.256598		5.42468	0.067532		5.425	0.041544
	5.42843	0.060916		5.42947	0.252366		5.42802	0.067294		5.42833	0.041008
	5.43177	0.060976		5.4328	0.248253		5.43135	0.067115		5.43167	0.04065
	5.4351	0.061035		5.43613	0.244141		5.43468	0.067055		5.435	0.040412
	5.43843	0.061035		5.43947	0.240147		5.43802	0.067055		5.43833	0.040293
	5.44177	0.061035		5.4428	0.236154		5.44135	0.067055		5.44167	0.040352
	5.4451	0.061095		5.44613	0.232339		5.44468	0.067115		5.445	0.040472
	5.44843	0.061214		5.44947	0.228703		5.44802	0.067174		5.44833	0.04065
	5.45177	0.061333		5.4528	0.225246		5.45135	0.067174		5.45167	0.040889
	5.4551	0.061512		5.45613	0.222027		5.45468	0.067115		5.455	0.041068
	5.45843	0.061691		5.45947	0.218987		5.45802	0.066936		5.45833	0.041246
	5.46177	0.06181		5.4628	0.216186		5.46135	0.066698		5.46167	0.041425
	5.4651	0.061929		5.46613	0.213623		5.46468	0.0664		5.465	0.041485
	5.46843	0.061989		5.46947	0.211179		5.46802	0.066042		5.46833	0.041485
	5.47177	0.061989		5.4728	0.208855		5.47135	0.065625		5.47167	0.041425
	5.4751	0.061929		5.47613	0.20659		5.47468	0.065148		5.475	0.041366
	5.47843	0.06181		5.47947	0.204325		5.47802	0.064611		5.47833	0.041246
	5.48177	0.061691		5.4828	0.20206		5.48135	0.064075		5.48167	0.041127
	5.4851	0.061631		5.48613	0.199795		5.48468	0.063419		5.485	0.040889
	5.48843	0.061572		5.48947	0.197589		5.48802	0.062704		5.48833	0.040531
	5.49177	0.061572		5.4928	0.195384		5.49135	0.061989		5.49167	0.040114
	5.4951	0.061631		5.49613	0.193298		5.49468	0.061154		5.495	0.039577
	5.49843	0.06175		5.49947	0.191391		5.49802	0.06038		5.49833	0.038922
	5.50177	0.06181		5.5028	0.189662		5.50135	0.059545		5.50167	0.038147
	5.5051	0.061929		5.50613	0.188112		5.50468	0.05877		5.505	0.037313
	5.50843	0.061929		5.50947	0.186861		5.50802	0.057995		5.50833	0.036538
	5.51177	0.06187		5.5128	0.185847		5.51135	0.05728		5.51167	0.035763
	5.5151	0.061691		5.51613	0.185072		5.51468	0.056565		5.515	0.035107
	5.51843	0.061452		5.51947	0.184536		5.51802	0.055969		5.51833	0.03469
	5.52177	0.061095		5.5228	0.184119		5.52135	0.055492		5.52167	0.034451
	5.5251	0.060678		5.52613	0.18394		5.52468	0.055134		5.525	0.034392
	5.52843	0.060201		5.52947	0.18388		5.52802	0.054836		5.52833	0.03463
	5.53177	0.059664		5.5328	0.18394		5.53135	0.054657		5.53167	0.034928
	5.5351	0.059187		5.53613	0.184178		5.53468	0.054598		5.535	0.035405
	5.53843	0.058651		5.53947	0.184655		5.53802	0.054657		5.53833	0.035882
	5.54177	0.058115		5.5428	0.185251		5.54135	0.054717		5.54167	0.036418
	5.5451	0.057518		5.54613	0.186086		5.54468	0.054955		5.545	0.036836
	5.54843	0.056982		5.54947	0.187159		5.54802	0.055134		5.54833	0.037134
	5.55177	0.056446		5.5528	0.18841		5.55135	0.055373		5.55167	0.037372
	5.5551	0.055909		5.55613	0.18996		5.55468	0.055611		5.555	0.037432
	5.55843	0.055373		5.55947	0.191748		5.55802	0.05585		5.55833	0.037372
	5.56177	0.054896		5.5628	0.193715		5.56135	0.056088		5.56167	0.037253
	5.5651	0.054419		5.56613	0.19592		5.56468	0.056267		5.565	0.036955
	5.56843	0.054121		5.56947	0.198305		5.56802	0.056446		5.56833	0.036657
	5.57177	0.053823		5.5728	0.200868		5.57135	0.056565		5.57167	0.03624
	5.5751	0.053644		5.57613	0.203669		5.57468	0.056624		5.575	0.035822
	5.57843	0.053525		5.57947	0.206649		5.57802	0.056684		5.57833	0.035346
	5.58177	0.053525		5.5828	0.209808		5.58135	0.056624		5.58167	0.034869
	5.5851	0.053525		5.58613	0.213146		5.58468	0.056446		5.585	0.034451
	5.58843	0.053525		5.58947	0.216663		5.58802	0.056207		5.58833	0.034153
	5.59177	0.053585		5.5928	0.220358		5.59135	0.055909		5.59167	0.033975
	5.5951	0.053644		5.59613	0.224233		5.59468	0.055552		5.595	0.033915
	5.59843	0.053644		5.59947	0.228167		5.59802	0.055134		5.59833	0.033975
	5.60177	0.053644		5.6028	0.23222		5.60135	0.054717		5.60167	0.034213
	5.6051	0.053644		5.60613	0.236273		5.60468	0.054359		5.605	0.034571
	5.60843	0.053525		5.60947	0.240266		5.60802	0.054002		5.60833	0.034988
	5.61177	0.053465		5.6128	0.24426		5.61135	0.053763		5.61167	0.035524
	5.6151	0.053287		5.61613	0.248134		5.61468	0.053525		5.615	0.036001
	5.61843	0.053108		5.61947	0.25183		5.61802	0.053346		5.61833	0.036418
	5.62177	0.052929		5.6228	0.255346		5.62135	0.053287		5.62167	0.036716
	5.6251	0.052691		5.62613	0.258625		5.62468	0.053227		5.625	0.036895
	5.62843	0.052512		5.62947	0.261724		5.62802	0.053227		5.62833	0.036955
	5.63177	0.052392		5.6328	0.264704		5.63135	0.053287		5.63167	0.036836
	5.6351	0.052273		5.63613	0.267446		5.63468	0.053346		5.635	0.036657
	5.63843	0.052154		5.63947	0.270069		5.63802	0.053525		5.63833	0.036299
	5.64177	0.052154		5.6428	0.272512		5.64135	0.053704		5.64167	0.035882
	5.6451	0.052214		5.64613	0.274777		5.64468	0.053942		5.645	0.035405
	5.64843	0.052333		5.64947	0.276923		5.64802	0.05424		5.64833	0.034928
	5.65177	0.052512		5.6528	0.278831		5.65135	0.054479		5.65167	0.034451
	5.6551	0.052631		5.65613	0.28044		5.65468	0.054657		5.655	0.034094
	5.65843	0.05275		5.65947	0.281751		5.65802	0.054836		5.65833	0.033855
	5.66177	0.05281		5.6628	0.282645		5.66135	0.054955		5.66167	0.033617
	5.6651	0.05275		5.66613	0.283241		5.66468	0.054955		5.665	0.033557
	5.66843	0.052571		5.66947	0.28348		5.66802	0.054955		5.66833	0.033557
	5.67177	0.052333		5.6728	0.28342		5.67135	0.054836		5.67167	0.033617
	5.6751	0.051856		5.67613	0.283122		5.67468	0.054657		5.675	0.033736
	5.67843	0.05132		5.67947	0.282526		5.67802	0.054479		5.67833	0.033855
	5.68177	0.050724		5.6828	0.281811		5.68135	0.05424		5.68167	0.033975
	5.6851	0.050068		5.68613	0.280976		5.68468	0.054061		5.685	0.034034
	5.68843	0.049412		5.68947	0.280023		5.68802	0.053823		5.68833	0.034094
	5.69177	0.048757		5.6928	0.279009		5.69135	0.053585		5.69167	0.034034
	5.6951	0.04822		5.69613	0.277877		5.69468	0.053406		5.695	0.033975
	5.69843	0.047803		5.69947	0.276566		5.69802	0.053167		5.69833	0.033796
	5.70177	0.047505		5.7028	0.275075		5.70135	0.052989		5.70167	0.033617
	5.7051	0.047266		5.70613	0.273407		5.70468	0.05281		5.705	0.033438
	5.70843	0.047147		5.70947	0.271499		5.70802	0.052691		5.70833	0.0332
	5.71177	0.047088		5.7128	0.269413		5.71135	0.052512		5.71167	0.032961
	5.7151	0.047028		5.71613	0.267088		5.71468	0.052333		5.715	0.032723
	5.71843	0.046968		5.71947	0.264525		5.71802	0.052154		5.71833	0.032485
	5.72177	0.046909		5.7228	0.261784		5.72135	0.051916		5.72167	0.032306
	5.7251	0.046849		5.72613	0.258863		5.72468	0.051618		5.725	0.032067
	5.72843	0.04673		5.72947	0.255823		5.72802	0.0512		5.72833	0.031888
	5.73177	0.046611		5.7328	0.252604		5.73135	0.050783		5.73167	0.03165
	5.7351	0.046492		5.73613	0.249326		5.73468	0.050306		5.735	0.031412
	5.73843	0.046432		5.73947	0.245929		5.73802	0.04977		5.73833	0.031173
	5.74177	0.046432		5.7428	0.242472		5.74135	0.049233		5.74167	0.030875
	5.7451	0.046551		5.74613	0.238955		5.74468	0.048757		5.745	0.030637
	5.74843	0.04667		5.74947	0.235379		5.74802	0.04828		5.74833	0.030458
	5.75177	0.046849		5.7528	0.231802		5.75135	0.047922		5.75167	0.03022
	5.7551	0.047028		5.75613	0.228167		5.75468	0.047624		5.755	0.0301
	5.75843	0.047147		5.75947	0.224411		5.75802	0.047326		5.75833	0.029922
	5.76177	0.047266		5.7628	0.220656		5.76135	0.047147		5.76167	0.029743
	5.7651	0.047266		5.76613	0.216842		5.76468	0.047028		5.765	0.029504
	5.76843	0.047207		5.76947	0.212967		5.76802	0.046909		5.76833	0.029206
	5.77177	0.047088		5.7728	0.209093		5.77135	0.046849		5.77167	0.028849
	5.7751	0.046849		5.77613	0.205219		5.77468	0.04679		5.775	0.028372
	5.77843	0.046611		5.77947	0.201344		5.77802	0.04679		5.77833	0.027835
	5.78177	0.046372		5.7828	0.19747		5.78135	0.04679		5.78167	0.027299
	5.7851	0.046074		5.78613	0.193715		5.78468	0.046849		5.785	0.026762
	5.78843	0.045836		5.78947	0.190139		5.78802	0.046968		5.78833	0.026286
	5.79177	0.045598		5.7928	0.186622		5.79135	0.047088		5.79167	0.025868
	5.7951	0.045359		5.79613	0.183225		5.79468	0.047207		5.795	0.02557
	5.79843	0.04518		5.79947	0.180006		5.79802	0.047266		5.79833	0.025332
	5.80177	0.045061		5.8028	0.176787		5.80135	0.047386		5.80167	0.025153
	5.8051	0.044882		5.80613	0.173688		5.80468	0.047445		5.805	0.025034
	5.80843	0.044644		5.80947	0.170648		5.80802	0.047505		5.80833	0.024915
	5.81177	0.044465		5.8128	0.167549		5.81135	0.047505		5.81167	0.024736
	5.8151	0.044286		5.81613	0.164509		5.81468	0.047505		5.815	0.024557
	5.81843	0.044048		5.81947	0.161529		5.81802	0.047505		5.81833	0.024259
	5.82177	0.043869		5.8228	0.158489		5.82135	0.047565		5.82167	0.024021
	5.8251	0.04369		5.82613	0.155509		5.82468	0.047624		5.825	0.023723
	5.82843	0.043452		5.82947	0.152528		5.82802	0.047743		5.82833	0.023425
	5.83177	0.043273		5.8328	0.149667		5.83135	0.047863		5.83167	0.023186
	5.8351	0.043094		5.83613	0.146866		5.83468	0.048041		5.835	0.023067
	5.83843	0.043035		5.83947	0.144124		5.83802	0.04828		5.83833	0.022948
	5.84177	0.043035		5.8428	0.141501		5.84135	0.048459		5.84167	0.022888
	5.8451	0.043035		5.84613	0.138998		5.84468	0.048637		5.845	0.022888
	5.84843	0.043154		5.84947	0.136614		5.84802	0.048757		5.84833	0.022888
	5.85177	0.043333		5.8528	0.13423		5.85135	0.048757		5.85167	0.022888
	5.8551	0.043571		5.85613	0.131965		5.85468	0.048697		5.855	0.022829
	5.85843	0.043869		5.85947	0.1297		5.85802	0.048578		5.85833	0.022769
	5.86177	0.044107		5.8628	0.127494		5.86135	0.048339		5.86167	0.02265
	5.8651	0.044286		5.86613	0.125289		5.86468	0.048101		5.865	0.02259
	5.86843	0.044346		5.86947	0.123084		5.86802	0.047803		5.86833	0.022471
	5.87177	0.044286		5.8728	0.120878		5.87135	0.047505		5.87167	0.022411
	5.8751	0.044107		5.87613	0.118732		5.87468	0.047266		5.875	0.022352
	5.87843	0.04375		5.87947	0.116646		5.87802	0.047088		5.87833	0.022411
	5.88177	0.043273		5.8828	0.114679		5.88135	0.046909		5.88167	0.022471
	5.8851	0.042737		5.88613	0.112891		5.88468	0.04679		5.885	0.02259
	5.88843	0.04214		5.88947	0.111163		5.88802	0.04667		5.88833	0.022769
	5.89177	0.041485		5.8928	0.109613		5.89135	0.046611		5.89167	0.023007
	5.8951	0.040948		5.89613	0.108063		5.89468	0.046551		5.895	0.023186
	5.89843	0.040472		5.89947	0.106692		5.89802	0.046492		5.89833	0.023425
	5.90177	0.040174		5.9028	0.105262		5.90135	0.046372		5.90167	0.023663
	5.9051	0.039935		5.90613	0.103891		5.90468	0.046253		5.905	0.023842
	5.90843	0.039816		5.90947	0.102401		5.90802	0.046074		5.90833	0.023901
	5.91177	0.039816		5.9128	0.100851		5.91135	0.045955		5.91167	0.023961
	5.9151	0.039816		5.91613	0.099242		5.91468	0.045836		5.915	0.023842
	5.91843	0.039935		5.91947	0.097454		5.91802	0.045657		5.91833	0.023663
	5.92177	0.040114		5.9228	0.095665		5.92135	0.045598		5.92167	0.023365
	5.9251	0.040293		5.92613	0.093758		5.92468	0.045478		5.925	0.023007
	5.92843	0.040472		5.92947	0.09191		5.92802	0.045419		5.92833	0.02265
	5.93177	0.04077		5.9328	0.090063		5.93135	0.045359		5.93167	0.022233
	5.9351	0.041008		5.93613	0.088334		5.93468	0.0453		5.935	0.021935
	5.93843	0.041306		5.93947	0.086725		5.93802	0.04524		5.93833	0.021696
	5.94177	0.041604		5.9428	0.085235		5.94135	0.045121		5.94167	0.021636
	5.9451	0.041842		5.94613	0.083864		5.94468	0.045002		5.945	0.021696
	5.94843	0.042021		5.94947	0.082731		5.94802	0.044882		5.94833	0.021935
	5.95177	0.042021		5.9528	0.081658		5.95135	0.044823		5.95167	0.022292
	5.9551	0.041902		5.95613	0.080705		5.95468	0.044703		5.955	0.022709
	5.95843	0.041664		5.95947	0.079811		5.95802	0.044703		5.95833	0.023127
	5.96177	0.041306		5.9628	0.078976		5.96135	0.044763		5.96167	0.023484
	5.9651	0.040829		5.96613	0.078201		5.96468	0.044882		5.965	0.023842
	5.96843	0.040293		5.96947	0.077367		5.96802	0.045061		5.96833	0.02408
	5.97177	0.039816		5.9728	0.076532		5.97135	0.0453		5.97167	0.024319
	5.9751	0.039339		5.97613	0.075698		5.97468	0.045598		5.975	0.024498
	5.97843	0.039041		5.97947	0.074804		5.97802	0.045896		5.97833	0.024676
	5.98177	0.038922		5.9828	0.07391		5.98135	0.046253		5.98167	0.024855
	5.9851	0.038862		5.98613	0.073016		5.98468	0.04667		5.985	0.025094
	5.98843	0.038981		5.98947	0.072181		5.98802	0.047088		5.98833	0.025332
	5.99177	0.03916		5.9928	0.071466		5.99135	0.047565		5.99167	0.02569
	5.9951	0.039399		5.99613	0.070691		5.99468	0.048041		5.995	0.026047
	5.99843	0.039637		5.99947	0.070035		5.99802	0.048518		5.99833	0.026464
	6.00177	0.039876		6.0028	0.069439		6.00135	0.048935		6.00167	0.026941
	6.0051	0.040174		6.00613	0.068903		6.00468	0.049233		6.005	0.027359
	6.00843	0.040352		6.00947	0.068426		6.00802	0.049472		6.00833	0.027835
	6.01177	0.040531		6.0128	0.067949		6.01135	0.049531		6.01167	0.028312
	6.0151	0.04071		6.01613	0.067472		6.01468	0.049531		6.015	0.028789
	6.01843	0.040829		6.01947	0.067055		6.01802	0.049353		6.01833	0.029325
	6.02177	0.040889		6.0228	0.066578		6.02135	0.049055		6.02167	0.029922
	6.0251	0.040889		6.02613	0.066102		6.02468	0.048757		6.025	0.030577
	6.02843	0.040829		6.02947	0.065625		6.02802	0.048459		6.02833	0.031233
	6.03177	0.04071		6.0328	0.065148		6.03135	0.048161		6.03167	0.031888
	6.0351	0.040591		6.03613	0.064671		6.03468	0.047922		6.035	0.032485
	6.03843	0.040412		6.03947	0.064075		6.03802	0.047803		6.03833	0.033021
	6.04177	0.040293		6.0428	0.063479		6.04135	0.047803		6.04167	0.033498
	6.0451	0.040174		6.04613	0.062764		6.04468	0.047863		6.045	0.033796
	6.04843	0.040174		6.04947	0.062048		6.04802	0.047982		6.04833	0.034034
	6.05177	0.040293		6.0528	0.061333		6.05135	0.048101		6.05167	0.034153
	6.0551	0.040472		6.05613	0.060558		6.05468	0.04828		6.055	0.034153
	6.05843	0.04065		6.05947	0.059843		6.05802	0.048459		6.05833	0.034094
	6.06177	0.040948		6.0628	0.059187		6.06135	0.048578		6.06167	0.034034
	6.0651	0.041127		6.06613	0.058591		6.06468	0.048697		6.065	0.033915
	6.06843	0.041306		6.06947	0.058115		6.06802	0.048816		6.06833	0.033796
	6.07177	0.041366		6.0728	0.057757		6.07135	0.048876		6.07167	0.033736
	6.0751	0.041366		6.07613	0.057518		6.07468	0.048935		6.075	0.033617
	6.07843	0.041246		6.07947	0.05734		6.07802	0.048935		6.07833	0.033617
	6.08177	0.041127		6.0828	0.05722		6.08135	0.048935		6.08167	0.033617
	6.0851	0.041008		6.08613	0.057101		6.08468	0.048935		6.085	0.033736
	6.08843	0.040889		6.08947	0.056982		6.08802	0.048935		6.08833	0.033855
	6.09177	0.040829		6.0928	0.056803		6.09135	0.048995		6.09167	0.034034
	6.0951	0.040829		6.09613	0.056565		6.09468	0.048995		6.095	0.034273
	6.09843	0.040889		6.09947	0.056207		6.09802	0.049055		6.09833	0.034511
	6.10177	0.040948		6.1028	0.05585		6.10135	0.049174		6.10167	0.03475
	6.1051	0.041008		6.10613	0.055373		6.10468	0.049293		6.105	0.035048
	6.10843	0.041127		6.10947	0.054896		6.10802	0.049412		6.10833	0.035286
	6.11177	0.041187		6.1128	0.054419		6.11135	0.049472		6.11167	0.035524
	6.1151	0.041187		6.11613	0.053823		6.11468	0.049591		6.115	0.035584
	6.11843	0.041246		6.11947	0.053227		6.11802	0.049651		6.11833	0.035644
	6.12177	0.041246		6.1228	0.052631		6.12135	0.049651		6.12167	0.035524
	6.1251	0.041187		6.12613	0.051975		6.12468	0.049651		6.125	0.035286
	6.12843	0.041187		6.12947	0.051379		6.12802	0.049531		6.12833	0.034928
	6.13177	0.041068		6.1328	0.050724		6.13135	0.049412		6.13167	0.034451
	6.1351	0.041008		6.13613	0.050128		6.13468	0.049174		6.135	0.033855
	6.13843	0.040889		6.13947	0.049531		6.13802	0.048876		6.13833	0.033259
	6.14177	0.04071		6.1428	0.049055		6.14135	0.048578		6.14167	0.032604
	6.1451	0.040591		6.14613	0.048578		6.14468	0.04822		6.145	0.031948
	6.14843	0.040412		6.14947	0.048101		6.14802	0.047922		6.14833	0.031352
	6.15177	0.040293		6.1528	0.047684		6.15135	0.047684		6.15167	0.030816
	6.1551	0.040174		6.15613	0.047207		6.15468	0.047445		6.155	0.030458
	6.15843	0.040114		6.15947	0.04667		6.15802	0.047266		6.15833	0.03016
	6.16177	0.040114		6.1628	0.046074		6.16135	0.047147		6.16167	0.030041
	6.1651	0.040114		6.16613	0.045359		6.16468	0.047088		6.165	0.029981
	6.16843	0.040233		6.16947	0.044584		6.16802	0.047028		6.16833	0.030041
	6.17177	0.040352		6.1728	0.04369		6.17135	0.047028		6.17167	0.03022
	6.1751	0.040472		6.17613	0.042737		6.17468	0.046968		6.175	0.030398
	6.17843	0.040591		6.17947	0.041723		6.17802	0.046909		6.17833	0.030696
	6.18177	0.04065		6.1828	0.04071		6.18135	0.046849		6.18167	0.030935
	6.1851	0.04071		6.18613	0.039756		6.18468	0.04673		6.185	0.031114
	6.18843	0.04077		6.18947	0.038803		6.18802	0.04673		6.18833	0.031292
	6.19177	0.04077		6.1928	0.037968		6.19135	0.04673		6.19167	0.031412
	6.1951	0.04071		6.19613	0.037193		6.19468	0.04679		6.195	0.031352
	6.19843	0.04065		6.19947	0.036538		6.19802	0.046909		6.19833	0.031233
	6.20177	0.040472		6.2028	0.035942		6.20135	0.047088		6.20167	0.030994
	6.2051	0.040293		6.20613	0.035465		6.20468	0.047266		6.205	0.030637
	6.20843	0.040054		6.20947	0.035107		6.20802	0.047386		6.20833	0.03016
	6.21177	0.039756		6.2128	0.034809		6.21135	0.047505		6.21167	0.029624
	6.2151	0.039458		6.21613	0.03463		6.21468	0.047565		6.215	0.029027
	6.21843	0.039101		6.21947	0.034451		6.21802	0.047565		6.21833	0.028431
	6.22177	0.038743		6.2228	0.034392		6.22135	0.047505		6.22167	0.027955
	6.2251	0.038385		6.22613	0.034332		6.22468	0.047326		6.225	0.027597
	6.22843	0.038028		6.22947	0.034273		6.22802	0.047088		6.22833	0.027299
	6.23177	0.037849		6.2328	0.034213		6.23135	0.046849		6.23167	0.02718
	6.2351	0.03767		6.23613	0.034153		6.23468	0.046611		6.235	0.027239
	6.23843	0.03767		6.23947	0.034034		6.23802	0.046372		6.23833	0.027418
	6.24177	0.03773		6.2428	0.033915		6.24135	0.046134		6.24167	0.027657
	6.2451	0.037849		6.24613	0.033736		6.24468	0.045896		6.245	0.027955
	6.24843	0.038087		6.24947	0.033617		6.24802	0.045657		6.24833	0.028312
	6.25177	0.038326		6.2528	0.033498		6.25135	0.045359		6.25167	0.02861
	6.2551	0.038564		6.25613	0.033438		6.25468	0.045002		6.255	0.028849
	6.25843	0.038862		6.25947	0.033438		6.25802	0.044644		6.25833	0.028968
	6.26177	0.039101		6.2628	0.033498		6.26135	0.044286		6.26167	0.028968
	6.2651	0.039339		6.26613	0.033617		6.26468	0.043929		6.265	0.028849
	6.26843	0.039458		6.26947	0.033796		6.26802	0.043631		6.26833	0.02861
	6.27177	0.039577		6.2728	0.033855		6.27135	0.043333		6.27167	0.028312
	6.2751	0.039637		6.27613	0.033915		6.27468	0.043154		6.275	0.027835
	6.27843	0.039577		6.27947	0.033796		6.27802	0.043094		6.27833	0.027299
	6.28177	0.039518		6.2828	0.033617		6.28135	0.043094		6.28167	0.026762
	6.2851	0.039399		6.28613	0.033319		6.28468	0.043273		6.285	0.026166
	6.28843	0.039279		6.28947	0.032902		6.28802	0.043511		6.28833	0.02563
	6.29177	0.039101		6.2928	0.032425		6.29135	0.043809		6.29167	0.025094
	6.2951	0.038922		6.29613	0.031888		6.29468	0.044107		6.295	0.024617
	6.29843	0.038743		6.29947	0.031352		6.29802	0.044465		6.29833	0.024199
	6.30177	0.038624		6.3028	0.030875		6.30135	0.044763		6.30167	0.023961
	6.3051	0.038445		6.30613	0.030458		6.30468	0.045002		6.305	0.023723
	6.30843	0.038266		6.30947	0.0301		6.30802	0.04524		6.30833	0.023603
	6.31177	0.038087		6.3128	0.029862		6.31135	0.045419		6.31167	0.023603
	6.3151	0.037849		6.31613	0.029624		6.31468	0.045538		6.315	0.023603
	6.31843	0.037611		6.31947	0.029445		6.31802	0.045598		6.31833	0.023663
	6.32177	0.037372		6.3228	0.029266		6.32135	0.045598		6.32167	0.023723
	6.3251	0.037134		6.32613	0.029087		6.32468	0.045538		6.325	0.023723
	6.32843	0.036955		6.32947	0.028968		6.32802	0.045419		6.32833	0.023663
	6.33177	0.036776		6.3328	0.028789		6.33135	0.0453		6.33167	0.023544
	6.3351	0.036657		6.33613	0.028551		6.33468	0.045121		6.335	0.023305
	6.33843	0.036657		6.33947	0.028253		6.33802	0.045002		6.33833	0.023007
	6.34177	0.036597		6.3428	0.027895		6.34135	0.044882		6.34167	0.02259
	6.3451	0.036657		6.34613	0.027478		6.34468	0.044823		6.345	0.022113
	6.34843	0.036657		6.34947	0.027001		6.34802	0.044703		6.34833	0.021636
	6.35177	0.036716		6.3528	0.026464		6.35135	0.044644		6.35167	0.0211
	6.3551	0.036776		6.35613	0.025928		6.35468	0.044525		6.355	0.020623
	6.35843	0.036836		6.35947	0.025332		6.35802	0.044465		6.35833	0.020146
	6.36177	0.036895		6.3628	0.024736		6.36135	0.044346		6.36167	0.019848
	6.3651	0.036955		6.36613	0.024199		6.36468	0.044167		6.365	0.01955
	6.36843	0.037074		6.36947	0.023663		6.36802	0.043929		6.36833	0.019431
	6.37177	0.037253		6.3728	0.023186		6.37135	0.04369		6.37167	0.019372
	6.3751	0.037432		6.37613	0.022709		6.37468	0.043452		6.375	0.019431
	6.37843	0.03767		6.37947	0.022233		6.37802	0.043333		6.37833	0.019491
	6.38177	0.037909		6.3828	0.021696		6.38135	0.043213		6.38167	0.01961
	6.3851	0.038087		6.38613	0.02116		6.38468	0.043154		6.385	0.019729
	6.38843	0.038266		6.38947	0.020623		6.38802	0.043213		6.38833	0.019789
	6.39177	0.038266		6.3928	0.019968		6.39135	0.043333		6.39167	0.019789
	6.3951	0.038207		6.39613	0.019312		6.39468	0.043511		6.395	0.019729
	6.39843	0.038028		6.39947	0.018597		6.39802	0.04369		6.39833	0.01961
	6.40177	0.03773		6.4028	0.017881		6.40135	0.043869		6.40167	0.019491
	6.4051	0.037313		6.40613	0.017166		6.40468	0.044048		6.405	0.019372
	6.40843	0.036776		6.40947	0.016451		6.40802	0.044167		6.40833	0.019193
	6.41177	0.03618		6.4128	0.015736		6.41135	0.044227		6.41167	0.019014
	6.4151	0.035584		6.41613	0.01502		6.41468	0.044167		6.415	0.018835
	6.41843	0.034988		6.41947	0.014305		6.41802	0.044107		6.41833	0.018656
	6.42177	0.034511		6.4228	0.01359		6.42135	0.043988		6.42167	0.018477
	6.4251	0.034034		6.42613	0.012875		6.42468	0.043809		6.425	0.018299
	6.42843	0.033736		6.42947	0.012219		6.42802	0.04369		6.42833	0.01812
	6.43177	0.033617		6.4328	0.011623		6.43135	0.043631		6.43167	0.017941
	6.4351	0.033617		6.43613	0.011146		6.43468	0.043571		6.435	0.017762
	6.43843	0.033736		6.43947	0.010729		6.43802	0.043571		6.43833	0.017643
	6.44177	0.033975		6.4428	0.01049		6.44135	0.04369		6.44167	0.017583
	6.4451	0.034213		6.44613	0.010312		6.44468	0.043809		6.445	0.017524
	6.44843	0.034511		6.44947	0.010192		6.44802	0.043988		6.44833	0.017583
	6.45177	0.034809		6.4528	0.010133		6.45135	0.044227		6.45167	0.017643
	6.4551	0.035048		6.45613	0.010073		6.45468	0.044465		6.455	0.017762
	6.45843	0.035167		6.45947	0.009954		6.45802	0.044763		6.45833	0.017941
	6.46177	0.035286		6.4628	0.009716		6.46135	0.045061		6.46167	0.01812
	6.4651	0.035286		6.46613	0.009418		6.46468	0.045359		6.465	0.018358
	6.46843	0.035167		6.46947	0.00906		6.46802	0.045717		6.46833	0.018537
	6.47177	0.035107		6.4728	0.008643		6.47135	0.046074		6.47167	0.018716
	6.4751	0.034988		6.47613	0.008225		6.47468	0.046492		6.475	0.018895
	6.47843	0.034869		6.47947	0.007808		6.47802	0.046968		6.47833	0.018954
	6.48177	0.034809		6.4828	0.00751		6.48135	0.047445		6.48167	0.019014
	6.4851	0.03475		6.48613	0.007331		6.48468	0.047863		6.485	0.019014
	6.48843	0.03469		6.48947	0.007272		6.48802	0.04822		6.48833	0.018954
	6.49177	0.03463		6.4928	0.007272		6.49135	0.048518		6.49167	0.018954
	6.4951	0.03463		6.49613	0.007331		6.49468	0.048637		6.495	0.018895
	6.49843	0.03463		6.49947	0.007391		6.49802	0.048757		6.49833	0.018895
	6.50177	0.034571		6.5028	0.007451		6.50135	0.048757		6.50167	0.018954
	6.5051	0.034571		6.50613	0.007331		6.50468	0.048697		6.505	0.019073
	6.50843	0.034511		6.50947	0.007212		6.50802	0.048637		6.50833	0.019252
	6.51177	0.034451		6.5128	0.006914		6.51135	0.048637		6.51167	0.019491
	6.5151	0.034332		6.51613	0.006616		6.51468	0.048697		6.515	0.019729
	6.51843	0.034273		6.51947	0.006199		6.51802	0.048935		6.51833	0.019968
	6.52177	0.034153		6.5228	0.005841		6.52135	0.049233		6.52167	0.020146
	6.5251	0.034034		6.52613	0.005484		6.52468	0.04971		6.525	0.020266
	6.52843	0.033915		6.52947	0.005186		6.52802	0.050247		6.52833	0.020325
	6.53177	0.033796		6.5328	0.004888		6.53135	0.050843		6.53167	0.020325
	6.5351	0.033736		6.53613	0.004649		6.53468	0.051558		6.535	0.020266
	6.53843	0.033677		6.53947	0.00447		6.53802	0.052273		6.53833	0.020146
	6.54177	0.033736		6.5428	0.004292		6.54135	0.052929		6.54167	0.020087
	6.5451	0.033855		6.54613	0.004053		6.54468	0.053644		6.545	0.020087
	6.54843	0.034094		6.54947	0.003755		6.54802	0.0543		6.54833	0.020206
	6.55177	0.034332		6.5528	0.003457		6.55135	0.054896		6.55167	0.020325
	6.5551	0.03463		6.55613	0.003159		6.55468	0.055492		6.555	0.020564
	6.55843	0.034988		6.55947	0.002861		6.55802	0.056028		6.55833	0.020742
	6.56177	0.035226		6.5628	0.002623		6.56135	0.056505		6.56167	0.020981
	6.5651	0.035465		6.56613	0.002384		6.56468	0.056982		6.565	0.02116
	6.56843	0.035644		6.56947	0.002146		6.56802	0.057518		6.56833	0.021279
	6.57177	0.035763		6.5728	0.001907		6.57135	0.058055		6.57167	0.021279
	6.5751	0.035763		6.57613	0.001729		6.57468	0.058591		6.575	0.021279
	6.57843	0.035763		6.57947	0.00155		6.57802	0.059247		6.57833	0.02116
	6.58177	0.035703		6.5828	0.00149		6.58135	0.059903		6.58167	0.02104
	6.5851	0.035703		6.58613	0.001371		6.58468	0.060678		6.585	0.020921
	6.58843	0.035703		6.58947	0.001371		6.58802	0.061452		6.58833	0.020742
	6.59177	0.035822		6.5928	0.001311		6.59135	0.062287		6.59167	0.020623
	6.5951	0.035942		6.59613	0.001311		6.59468	0.063121		6.595	0.020504
	6.59843	0.03612		6.59947	0.001371		6.59802	0.064015		6.59833	0.020325
	6.60177	0.036299		6.6028	0.001371		6.60135	0.06485		6.60167	0.020146
	6.6051	0.036478		6.60613	0.001431		6.60468	0.065744		6.605	0.019908
	6.60843	0.036657		6.60947	0.001431		6.60802	0.066638		6.60833	0.01967
	6.61177	0.036836		6.6128	0.001431		6.61135	0.067532		6.61167	0.019312
	6.6151	0.036955		6.61613	0.001371		6.61468	0.068545		6.615	0.018954
	6.61843	0.037074		6.61947	0.001252		6.61802	0.069559		6.61833	0.018597
	6.62177	0.037193		6.6228	0.001132		6.62135	0.070691		6.62167	0.018299
	6.6251	0.037313		6.62613	0.001073		6.62468	0.071883		6.625	0.01806
	6.62843	0.037432		6.62947	0.001013		6.62802	0.073135		6.62833	0.017941
	6.63177	0.037611		6.6328	0.001013		6.63135	0.074446		6.63167	0.017941
	6.6351	0.037789		6.63613	0.001013		6.63468	0.075758		6.635	0.01806
	6.63843	0.038028		6.63947	0.001013		6.63802	0.077069		6.63833	0.018299
	6.64177	0.038207		6.6428	0.001073		6.64135	0.078321		6.64167	0.018597
	6.6451	0.038385		6.64613	0.001073		6.64468	0.079513		6.645	0.018895
	6.64843	0.038564		6.64947	0.001132		6.64802	0.080705		6.64833	0.019193
	6.65177	0.038683		6.6528	0.001192		6.65135	0.081837		6.65167	0.019372
	6.6551	0.038803		6.65613	0.001252		6.65468	0.083029		6.655	0.019431
[truncated: 4,004 more rows]

## Sheet: Fig4-supp1C
			Fig4-s1C. The irreversibility of the inhibition of dHNN
				RFU/min
				Ctrl			Remove free cpd
			w/o inhibitor	731.34	763.42	760.49	695.63	762.52	710.79
			Nam	17.525	11.603	13.7108	633.03	682.42	687.79
			dHNN	1.098	0.745	1.1245	0.7794	1.2745	1.60784

## Sheet: Fig4-supp1D
			Fig4-s1D. Time dependent inhibition of dHNN to SARM1-dN
			X axis	Y axis: RFU/min
			Time(min)	dHNN			Nam
			0	711.95	651.57	645.25	300.49	296.41	292.65
			2	548.03	561.99	560.23	312.58	266.08	323.21
			5	458.56	482.23	484.81	303.38	292.62	291.99
			10	384.35	375.25	361.73	315.36	300.34	310.09
			20	200.92	223.55	269.47	264.48	277.73	300.08
			40	117.71	99.491	95.464	320.82	315.62	339.9
