# Supplementary material for: Permeant fluorescent probes visualize the activation of SARM1 and uncover an anti-neurodegenerative drug candidate
Source: eLife. 2021 May 4;10:e67381. doi: 10.7554/eLife.67381 (PMC8143800; doi:10.7554/eLife.67381)
Supplement: Figure 4—source data 1. [file elife-67381-fig4-data1.xlsx]

## Sheet: 4B
		Fig 4B. Inhibitory effects of the 2,015 compounds (50 μM) from an approval drug library
		inhibition (%)
		-12.6323	0.655493	-7.00967	-8.88034	1.822	92.1505	-16.5318	64.103	-4.12326	49.9	-2.0925	-2.39815	-4.19406	-3.22185	-2.29799	-3.46016	2.1669	1.01649	0.863704	-3.70916	-17.2947	-29.8	2.56415	95.4063	25.6771	0.502526	2.31034	-0.30115	-8.69876	3.85574	0.954481	2.63291	30.622	2.41606	4.36987	12.6363	0.224244	2.50665	2.73045	-11.44	0.252779	6.99411	7.14644	7.88971	7.06107	3.64604	1.00442	-12.9972
		-12.8027	-7.32449	12.8635	-7.74881	-13.5692	1.85089	-4.44093	-15.1539	-5.58244	1.06762	2.10545	-2.38779	2.21597	3.07939	5.52114	-2.85749	-50.0292	9.64993	5.75293	8.47077	1.70314	58.6213	44.3545	3.3964	-6.97842	5.48496	0.644673	-46.3331	-1.61692	4.65759	3.55687	0.052394	3.35744	99.8005	6.16383	2.988	8.30947	6.34145	-0.95337	0.872554	18.4127	2.90445	6.60238	3.65274	7.46953	6.72794	3.51045	2.27501
		-4.8835	2.83642	-5.96027	-9.22862	1.94063	-17.6983	-3.33982	-2.02731	10.1197	-2.73316	1.57704	2.33339	-19.0708	-3.90913	1.46307	0.178296	1.26635	-0.93381	3.83679	6.18613	6.37847	-5.03393	6.05851	2.70435	-1.06291	1.96044	0.30753	8.60491	5.76561	4.84166	23.0911	4.06714	2.27752	5.41783	32.5065	-5.6514	-1.27664	5.18515	0.639873	99.799	10.8678	14.924	4.66051	-2.08082	7.878	9.36286	-7.01922	2.16452
		22.4054	9.38679	1.15586	0.425843	3.42043	-4.40595	-26.7536	0.098856	-3.14414	0.188657	1.48206	4.72507	-2.56738	-4.19924	41.9868	0.673899	1.41015	1.04885	1.8056	4.14596	1.5198	-18.6483	4.77688	40.4341	-2.23107	-15.0972	1.28616	4.15461	2.83702	-4.74416	2.10988	3.01561	-9.77571	4.27751	5.38408	2.91873	-40.5837	99.7071	12.5581	6.96311	5.39038	-12.5569	49.9782	19.2681	4.27883	4.95011	28.2007	7.77588
		-19.4595	-3.73981	-0.97792	5.7291	-5.81123	-10.7419	-3.0539	-5.96027	-0.78528	71.4346	-1.22562	3.2089	-23.134	-24.3981	1.03481	5.04626	0.802588	23.7172	4.3347	4.34728	38.2375	2.59111	-1.33645	-0.25255	-17.275	-12.3745	-23.8848	1.85657	8.15113	7.28914	4.23115	10.3016	-0.1825	12.6665	4.02884	-8.99064	1.05017	-0.53241	-1.11856	-3.96757	6.64256	19.3401	24.7372	5.86916	3.7649	4.33072	-4.65883	2.8944
		-17.4611	-5.00669	-2.92919	0.907957	-2.27065	0.29809	25.7787	-13.2559	-9.10692	-0.78873	1.48897	100.124	-8.64758	-2.63127	49.7507	0.903569	-0.64261	100.86	11.3234	-20.2175	16.9101	6.75954	7.99622	5.67204	-29.9826	0.600936	1.82194	6.43261	-6.22759	2.18095	3.02473	3.4129	0.071492	-2.73311	0.975573	-7.02439	-4.16117	20.194	1.04484	-1.50044	2.31351	9.27247	7.3624	-0.83367	8.84391	0.292956	-5.26483	-1.44469
		0.349799	0.652452	-7.4705	-46.9172	0.584013	-11.4765	22.9103	-3.26378	1.63057	-1.09266	-1.99061	-4.73629	0.394151	-5.88982	0.917384	-0.82154	-3.40718	29.3309	4.15135	-9.07473	6.6445	7.33474	21.4218	7.08489	-6.38432	1.5012	2.21922	3.00832	1.32078	0.413229	-10.2806	4.47353	1.13543	13.8814	-1.50754	9.91159	-7.21089	3.89208	2.02708	3.16029	0.940806	6.95226	7.09622	73.5821	25.8152	11.807	-2.14276	11.8354
		56.5656	1.39768	-9.76396	-0.25703	-2.49726	-12.3829	-0.62203	-48.9035	-1.49674	6.23432	-0.08936	-2.18575	0.938106	86.5631	-0.37257	99.9078	-1.34184	-5.06089	6.8602	3.98059	4.46591	16.1695	8.43122	11.9651	-2.15089	-5.05579	0.02688	-23.3108	0.93079	5.12231	6.57658	0.47519	-1.01909	3.10523	-15.0386	3.73933	6.47644	-5.23754	2.29173	99.9214	-0.32141	6.34793	6.1889	4.90491	3.99424	6.16211	3.04841	1.54681
		-17.5067	-9.84761	0.349799	-134.259	-3.35959	50.3179	7.03401	-1.58018	-1.82311	0.592738	-10.5713	-0.67304	5.59712	-55.849	-1.10647	-1.05639	1.38318	-1.54856	42.91	-3.35865	100.416	2.35204	2.20824	1.94221	-1.95224	8.54295	-1.4037	0.066973	0.43692	-4.02431	-7.75658	1.24606	-6.04749	3.61144	37.2134	2.34324	3.86899	-10.353	2.66118	5.68958	-146.083	1.85483	7.63191	-8.6062	-50.0452	4.82456	-31.8301	3.30287
		-1.27297	-2.71323	-0.22205	-0.96575	19.5492	-4.19759	-3.85349	-5.27284	-13.8229	14.3332	-0.97351	0.965735	-3.76063	-1.39658	-2.5881	-62.3316	-2.59291	0.906844	-9.18078	3.71276	-13.6979	-0.35561	-21.9647	-12.7327	-4.10814	-3.5924	-2.55364	24.6037	-0.55629	-0.94158	-15.161	8.33165	-16.0581	-4.58568	5.9418	-1.64609	1.49422	12.6387	2.14431	-2.90718	29.7124	4.24535	8.96612	6.84679	5.46404	3.4234	2.3403	-0.99103
		-20.9701	1.39964	-9.09032	0.128721	-5.07552	3.70358	8.0801	4.46939	39.1589	23.6106	-6.19416	-25.2934	4.38518	1.50935	34.8578	75.5807	2.28489	8.54237	1.33833	-0.00382	10.7525	9.08917	6.74901	4.83711	18.7098	-2.52897	5.26327	-1.14585	75.0827	1.81188	-4.05677	-8.10822	-0.29471	54.3535	4.15086	9.3597	6.90142	2.87768	-4.04076	57.7647	-5.65826	2.74082	5.19314	-8.00208	8.92371	59.3244	-3.38596	-3.36192
		0.520309	-14.4412	1.11613	8.69927	8.09314	12.336	8.67971	-7.58477	30.9925	3.92504	30.802	45.6413	10.571	7.00867	-5.84907	-6.46134	4.07347	17.3677	9.16565	10.2784	11.0737	29.0265	7.23845	10.4963	10.1063	-5.09942	1.531	5.11432	2.35235	-26.1397	15.9154	-5.43563	-0.50324	-3.58834	67.0782	73.4881	71.8442	0.311289	7.96641	9.87218	8.33475	0.188331	3.81071	7.60539	42.0981	3.08543	12.3097	-3.74259
		-2.89023	-5.88369	16.9993	71.9574	-12.5642	67.9	15.6404	3.68077	3.84371	1.40545	53.4301	0.637321	9.87708	15.4877	-6.7248	3.96957	4.24788	-0.11089	66.0118	10.9017	5.30361	9.0624	10.309	11.1234	15.6355	98.864	-8.61465	7.36134	7.07195	-19.5902	-1.51185	1.53525	-1.74591	-7.58806	-0.28527	10.721	15.8337	4.22693	64.6876	10.6849	10.3246	14.9423	-6.61965	-6.20292	3.93092	26.707	-15.8599	8.50296
		7.10306	-16.3345	-5.50894	0.832614	77.7459	-39.2013	-15.3471	3.61885	-7.42835	3.5317	5.45387	2.36653	8.26291	2.50383	6.13294	36.0267	33.0878	1.65953	4.90594	9.87687	11.3834	8.64179	4.84858	12.1673	13.9607	1.55653	-8.45719	0.347906	0.620272	-11.1468	12.5235	20.6264	0.279814	7.40989	-1.96283	35.0076	3.83457	8.9273	0.579539	10.4808	2.94974	-14.0207	6.85206	5.26126	2.28001	18.1119	1.20212	6.1388
		-5.48171	-0.637088	-48.1857	3.73291	3.66774	-0.23626	32.0092	-5.02664	12.3328	6.41866	2.40735	8.06624	4.65235	25.6515	-1.64108	5.77671	-1.70045	-2.01897	51.0095	27.0801	1.88131	1.58305	10.5996	-0.87947	28.7358	-7.03578	-4.55469	-2.73324	-9.86158	11.9575	-24.4034	10.617	22.6011	48.38	5.84043	8.31073	8.67106	41.0332	1.40431	1.89676	-0.51348	-0.35663	-6.90415	58.3307	4.2595	8.72736	-10.4223	-7.2167
		11.8899	2.46525	-2.7064	1.59842	3.38748	-20.3559	-16.2042	1.20411	-8.74815	47.7786	-7.40758	3.59479	1.08632	17.5472	2.29603	-4.40187	-3.15135	6.63812	6.0416	8.98593	-2.04956	-12.1712	67.2893	17.5474	9.64745	2.36938	-0.17555	-7.30815	2.07573	-32.4935	-11.5085	36.628	-4.73769	-1.04597	-1.45035	5.86445	0.139129	-0.62959	-7.528	22.54	5.86846	-3.82674	-10.6748	11.5323	-6.71983	9.52476	-8.34669	11.0955
		2.4337	-3.74921	-5.47961	-9.3445	-12.1633	-16.5887	1.26603	-5.48613	6.01079	46.5356	4.19222	13.1611	-0.59836	-2.90273	0.373858	1.9769	30.9653	-7.48318	4.21	42.3295	8.25176	-0.83741	0.202661	-3.05522	-1.83925	1.75229	-2.62685	-8.02311	11.4851	-9.00193	44.3989	-0.46919	0.667085	-5.68228	11.3375	4.05877	-1.79067	-3.28005	-32.3471	-2.97577	7.49797	-14.9142	3.56628	0.645135	67.3782	13.1552	-13.5198	53.4421
		-3.89728	2.28276	-9.05121	59.3306	21.2944	47.094	-11.0977	-5.50568	-1.93408	25.1542	6.54112	10.0812	-23.8351	-8.41319	-4.66905	-4.72471	0.859966	6.40104	-7.88085	8.36265	-126.839	1.86984	-6.51575	58.2632	-2.59254	-10.2829	9.59985	-11.3213	-39.4219	-16.4367	4.01209	0.713898	1.51823	0.639595	16.086	-4.93359	-6.25081	-4.56124	5.15179	-3.28005	3.55831	-11.1556	-7.63343	9.72912	-6.49142	1.98349	-3.17359	-0.55698
		4.12219	-17.4034	-6.4996	-3.02902	0.216708	-8.24304	2.93126	-6.18676	1.58213	-1.42214	-142.353	-1.77466	-58.8126	9.07927	1.93237	2.46672	-9.66	7.487	-3.57525	-5.84659	-3.94234	-1.12037		16.0867	11.4102	-3.72057	0.020215	-12.7853	-7.51242	-13.7556	6.82087		6.08037	-0.6496		-11.6118	-4.12884	-3.23601	68.4987	6.63317	-8.85323	38.7402	-5.89437	-12.5661	17.7833	-8.77144	4.9407	5.3414
		3.62202	-8.37013		11.1499	3.90237	-9.88871		-12.209	-3.77528	3.8063	6.67471	-3.31462	1.50192	87.6072	6.94188	5.30544	39.2885	-1.69394		8.56149	-4.52738			7.94203	8.68385	-5.68246	-3.61418	-14.9174	-4.50788		-1.18841		-9.62752	-2.99979		0.735684	-9.08145		4.42311	15.6215	3.85459	-9.57285		-5.30934	-2.25196	7.4411	-17.2704	-13.5519
[truncated: 54 more columns]

## Sheet: 4C
	Fig 4C. IC50s of the 27 most potent inhibitory compounds determined by PC6 versus by HPLC assays.
		IC50 (μM) in PC6 assay	IC50 (μM) in HPLC assay
	1	0.48	1.94
	2	0.5	1.3
	3	0.75	2.4
	4	0.79	17.3
	5	0.83	3.2
	6	1.3	2.8
	7	1.84	1.53
	8	3.1	1.49
	9	3.2	0.9
	10	3.3	15.6
	11	4.8	12.7
	12	6.74	2.86
	13	8.1	13.4
	14	8.1	31.5
	15	8.4	34.1
	16	9.3	28.8
	17	9.5	19.1
	18	10.1	16.4
	19	10.7	0.27
	20	11.1	12.1
	21	11.2	20.9
	22	17.2	1.3
	23	19.1	17.7
	24	20.8	37.5
	25	22.1	28.2
	26	22.9	25.9
	27	3.2	11.5

## Sheet: 4D
		Fig 4D. Inhibition curves of NSDP before and after UV at 254 nm for 30 min.
		X axis	y axis: Inhibition (%)
		log (μM)	NSDP			NSDP(UV)
		2.30103	59.4042	59.426	59.936	96.7204	96.899	97.326
		1.69897	15.5195	20.1284	16.8858	97.5137	97.3961	97.773
		1.09691	14.4969	4.79926	8.28724	92.6851	93.144	91.793
		0.49485	-2.76575	-1.38855	-0.5077	52.9546	58.7252	54.4763
		-0.10721	-6.15282	-6.70915	-2.40577	24.1454	22.2582	21.1892
		-0.70927	-6.04101	-8.35632	-7.81636	5.0147	2.70211	2.66393
		-1.31133	-10.9389	-8.41087	-8.74903	-0.48588	0.100449	0.220442

## Sheet: 4E
		Fig 4E. HPLC elution profile of dHNN
		Time (min)	mAU (275 nm)			Inhibition(%)
		0.00125	0.0144839		Time (min)	Average	STDEV	N
		0.004583	0.0140071		0.5	-3.8399	3.65228	4
		0.007917	0.0135303		1.5	6.74285	3.89394	4
		0.01125	0.013113		2.5	1.6038	8.13515	4
		0.014583	0.0126958		3.5	5.49495	3.45376	4
		0.017917	0.0123382		4.5	3.469	3.21754	4
		0.02125	0.0120997		5.5	0.640475	2.87491	4
		0.024583	0.0119805		6.5	-1.75887	6.20014	4
		0.027917	0.0119805		7.5	0.347233	3.10702	4
		0.03125	0.0120401		8.5	1.72245	4.14964	4
		0.034583	0.012219		9.5	84.6137	3.55907	4
		0.037917	0.0124574		10.5	29.3808	3.01434	4
		0.04125	0.0127554		11.5	-0.543875	4.86401	4
		0.044583	0.0131726		12.5	0.257725	1.92477	4
		0.047917	0.0135303		13.5	-2.9818	1.63385	4
		0.05125	0.0138879		14.5	0.40905	1.85172	4
		0.054583	0.0141263		15.5	-1.54692	1.62003	4
		0.057917	0.0143051		16.5	0.408325	3.29405	4
		0.06125	0.0144839		17.5	0.31215	5.76456	4
		0.064583	0.0145435		18.5	-1.7699	3.81499	4
		0.067917	0.0145435		19.5	1.2561	2.75994	4
		0.07125	0.0145435
		0.074583	0.0144839
		0.077917	0.0143647
		0.08125	0.0143051
		0.084583	0.0142455
		0.087917	0.0142455
		0.09125	0.0142455
		0.094583	0.0141859
		0.097917	0.0141859
		0.10125	0.0142455
		0.104583	0.0142455
		0.107917	0.0143647
		0.11125	0.0144839
		0.114583	0.0146627
		0.117917	0.0148416
		0.12125	0.0150204
		0.124583	0.0151396
		0.127917	0.0151396
		0.13125	0.01508
		0.134583	0.0149012
		0.137917	0.0145435
		0.14125	0.0141263
		0.144583	0.0135899
		0.147917	0.0129342
		0.15125	0.0122786
		0.154583	0.0116229
		0.157917	0.0109673
		0.16125	0.0103116
		0.164583	0.00971556
		0.167917	0.00917912
		0.17125	0.00864267
		0.174583	0.00822544
		0.177917	0.00786781
		0.18125	0.00762939
		0.184583	0.00756979
		0.187917	0.00756979
		0.19125	0.0077486
		0.194583	0.00804663
		0.197917	0.00840425
		0.20125	0.00882149
		0.204583	0.00935793
		0.207917	0.00983477
		0.21125	0.010252
		0.214583	0.01055
		0.217917	0.0107884
		0.22125	0.0109076
		0.224583	0.010848
		0.227917	0.0106692
		0.23125	0.0104904
		0.234583	0.0101924
		0.237917	0.00995398
		0.24125	0.00971556
		0.244583	0.00953674
		0.247917	0.00953674
		0.25125	0.00965595
		0.254583	0.00989437
		0.257917	0.010252
		0.26125	0.0107288
		0.264583	0.0112057
		0.267917	0.0117421
		0.27125	0.0121593
		0.274583	0.0125766
		0.277917	0.012815
		0.28125	0.0129938
		0.284583	0.0130534
		0.287917	0.0130534
		0.29125	0.0129938
		0.294583	0.0128746
		0.297917	0.0128746
		0.30125	0.0128746
		0.304583	0.0129938
		0.307917	0.0131726
		0.31125	0.013411
		0.314583	0.0137687
		0.317917	0.0141859
		0.32125	0.0145435
		0.324583	0.0149608
		0.327917	0.0152588
		0.33125	0.0154972
		0.334583	0.0155568
		0.337917	0.0154972
		0.34125	0.0153184
		0.344583	0.0150204
		0.347917	0.0146031
		0.35125	0.0141859
		0.354583	0.0137687
		0.357917	0.013411
		0.36125	0.013113
		0.364583	0.0129342
		0.367917	0.0128746
		0.37125	0.0128746
		0.374583	0.0129342
		0.377917	0.0129938
		0.38125	0.013113
		0.384583	0.0131726
		0.387917	0.0132322
		0.39125	0.0132322
		0.394583	0.0132918
		0.397917	0.0133514
		0.40125	0.013411
		0.404583	0.0135303
		0.407917	0.0137091
		0.41125	0.0138283
		0.414583	0.0140071
		0.417917	0.0141263
		0.42125	0.0141859
		0.424583	0.0143051
		0.427917	0.0143647
		0.43125	0.0143647
		0.434583	0.0143647
		0.437917	0.0143051
		0.44125	0.0143051
		0.444583	0.0143051
		0.447917	0.0143051
		0.45125	0.0143051
		0.454583	0.0142455
		0.457917	0.0141859
		0.46125	0.0140667
		0.464583	0.0138283
		0.467917	0.0135899
		0.47125	0.0132322
		0.474583	0.0128746
		0.477917	0.0124574
		0.48125	0.0120997
		0.484583	0.0118017
		0.487917	0.0115633
		0.49125	0.0113249
		0.494583	0.0112653
		0.497917	0.0111461
		0.50125	0.0111461
		0.504583	0.0110865
		0.507917	0.0110269
		0.51125	0.0109673
		0.514583	0.0109673
		0.517917	0.0109673
		0.52125	0.0110269
		0.524583	0.0111461
		0.527917	0.0112653
		0.53125	0.0115037
		0.534583	0.0116825
		0.537917	0.0119209
		0.54125	0.0121593
		0.544583	0.0122786
		0.547917	0.0123382
		0.55125	0.0122786
		0.554583	0.0121593
		0.557917	0.0119805
		0.56125	0.0117421
		0.564583	0.0115037
		0.567917	0.0112653
		0.57125	0.0110865
		0.574583	0.0109673
		0.577917	0.010848
		0.58125	0.0109076
		0.584583	0.0109673
		0.587917	0.0111461
		0.59125	0.0113249
		0.594583	0.0116229
		0.597917	0.0118613
		0.60125	0.0121593
		0.604583	0.0123978
		0.607917	0.0125766
		0.61125	0.0126958
		0.614583	0.0127554
		0.617917	0.0126958
		0.62125	0.0126362
		0.624583	0.012517
		0.627917	0.0123978
		0.63125	0.0123978
		0.634583	0.0123978
		0.637917	0.012517
		0.64125	0.0127554
		0.644583	0.0130534
		0.647917	0.0134706
		0.65125	0.0138283
		0.654583	0.0142455
		0.657917	0.0146627
		0.66125	0.0150204
		0.664583	0.0153184
		0.667917	0.0155568
		0.67125	0.0157356
		0.674583	0.0158548
		0.677917	0.0158548
		0.68125	0.0158548
		0.684583	0.0157356
		0.687917	0.0155568
		0.69125	0.0153184
		0.694583	0.0149608
		0.697917	0.0146031
		0.70125	0.0141859
		0.704583	0.0138283
		0.707917	0.0134706
		0.71125	0.0131726
		0.714583	0.0129342
		0.717917	0.012815
		0.72125	0.0127554
		0.724583	0.012815
		0.727917	0.0128746
		0.73125	0.0130534
		0.734583	0.0131726
		0.737917	0.0132918
		0.74125	0.013411
		0.744583	0.0135303
		0.747917	0.0135303
		0.75125	0.0135899
		0.754583	0.0135899
		0.757917	0.0136495
		0.76125	0.0137091
		0.764583	0.0137687
		0.767917	0.0138879
		0.77125	0.0139475
		0.774583	0.0140667
		0.777917	0.0141263
		0.78125	0.0141263
		0.784583	0.0141263
		0.787917	0.0141263
		0.79125	0.0140071
		0.794583	0.0138879
		0.797917	0.0137687
		0.80125	0.0135899
		0.804583	0.0135303
		0.807917	0.013411
		0.81125	0.0132918
		0.814583	0.0132322
		0.817917	0.0131726
		0.82125	0.013113
		0.824583	0.0131726
		0.827917	0.0132322
		0.83125	0.0132918
		0.834583	0.013411
		0.837917	0.0135303
		0.84125	0.0135899
		0.844583	0.0136495
		0.847917	0.0136495
		0.85125	0.0136495
		0.854583	0.0135303
		0.857917	0.013411
		0.86125	0.0132322
		0.864583	0.0130534
		0.867917	0.0128746
		0.87125	0.0126958
		0.874583	0.012517
		0.877917	0.0123978
		0.88125	0.0122786
		0.884583	0.0121593
		0.887917	0.0121593
		0.89125	0.0120997
		0.894583	0.0121593
		0.897917	0.0122786
		0.90125	0.0124574
		0.904583	0.0126362
		0.907917	0.0127554
		0.91125	0.012815
		0.914583	0.0127554
		0.917917	0.0126362
		0.92125	0.012517
		0.924583	0.0126362
		0.927917	0.0132322
		0.93125	0.0149012
		0.934583	0.0183582
		0.937917	0.0243187
		0.94125	0.033915
		0.944583	0.0480413
		0.947917	0.0677109
		0.95125	0.0938773
		0.954583	0.127077
		0.957917	0.167727
		0.96125	0.21565
		0.964583	0.270545
		0.967917	0.331581
		0.97125	0.397801
		0.974583	0.468075
		0.977917	0.541449
		0.98125	0.616968
		0.984583	0.693977
		0.987917	0.772178
		0.99125	0.851691
		0.994583	0.932813
		0.997917	1.01614
		1.00125	1.10215
		1.00458	1.19162
		1.00792	1.28478
		1.01125	1.38199
		1.01458	1.48308
		1.01792	1.58775
		1.02125	1.69534
		1.02458	1.80519
		1.02792	1.91641
		1.03125	2.02841
		1.03458	2.1404
		1.03792	2.25198
		1.04125	2.36279
		1.04458	2.47264
		1.04792	2.58136
		1.05125	2.68894
		1.05458	2.79522
		1.05792	2.9
		1.06125	3.00306
		1.06458	3.10403
		1.06792	3.20256
		1.07125	3.2984
		1.07458	3.39133
		1.07792	3.48127
		1.08125	3.56835
		1.08458	3.65275
		1.08792	3.73477
		1.09125	3.81464
		1.09458	3.89248
		1.09792	3.96812
		1.10125	4.04131
		1.10458	4.11135
		1.10792	4.17727
		1.11125	4.23777
		1.11458	4.29141
		1.11792	4.33642
		1.12125	4.37117
		1.12458	4.39382
		1.12792	4.4027
		1.13125	4.39638
		1.13458	4.37367
		1.13792	4.33385
		1.14125	4.27681
		1.14458	4.20314
		1.14792	4.11409
		1.15125	4.01163
		1.15458	3.8985
		1.15792	3.7778
		1.16125	3.65299
		1.16458	3.52752
		1.16792	3.40462
		1.17125	3.28702
		1.17458	3.17675
		1.17792	3.07506
		1.18125	2.98226
		1.18458	2.89798
		1.18792	2.82085
		1.19125	2.74932
		1.19458	2.68126
		1.19792	2.61462
		1.20125	2.54744
		1.20458	2.47842
		1.20792	2.40666
		1.21125	2.33233
		1.21458	2.25645
		1.21792	2.18111
		1.22125	2.10953
		1.22458	2.04617
		1.22792	1.99664
		1.23125	1.96803
		1.23458	1.96886
		1.23792	2.00921
		1.24125	2.10053
		1.24458	2.25556
		1.24792	2.4873
		1.25125	2.80827
		1.25458	3.2289
		1.25792	3.75581
		1.26125	4.38994
		1.26458	5.12433
		1.26792	5.9433
		1.27125	6.82169
		1.27458	7.72667
		1.27792	8.62026
		1.28125	9.46355
		1.28458	10.2213
		1.28792	10.8666
		1.29125	11.3845
		1.29458	11.7748
		1.29792	12.0526
		1.30125	12.2471
		1.30458	12.3979
		1.30792	12.5501
		1.31125	12.7478
		1.31458	13.0295
		1.31792	13.4236
		1.32125	13.9464
		1.32458	14.6019
		1.32792	15.3828
		1.33125	16.2724
		1.33458	17.2479
		1.33792	18.2831
		1.34125	19.3511
		1.34458	20.4265
		1.34792	21.4865
		1.35125	22.5118
		1.35458	23.4864
		1.35792	24.3977
		1.36125	25.2363
		1.36458	25.9966
		1.36792	26.6763
		1.37125	27.2769
		1.37458	27.803
		1.37792	28.2617
		1.38125	28.662
		1.38458	29.0137
		1.38792	29.3271
		1.39125	29.6119
		1.39458	29.8782
		1.39792	30.1367
		1.40125	30.4016
		1.40458	30.6927
		1.40792	31.0372
		1.41125	31.4701
		1.41458	32.0331
		1.41792	32.7708
		1.42125	33.727
		1.42458	34.9405
		1.42792	36.44
		1.43125	38.2402
		1.43458	40.3373
		1.43792	42.7085
		1.44125	45.3129
		1.44458	48.0976
		1.44792	51.003
		1.45125	53.9695
		1.45458	56.9414
		1.45792	59.8699
		1.46125	62.7145
		1.46458	65.4442
		1.46792	68.037
		1.47125	70.4783
		1.47458	72.7578
		1.47792	74.8678
		1.48125	76.8008
		1.48458	78.5488
		1.48792	80.1044
		1.49125	81.4604
		1.49458	82.6116
		1.49792	83.5552
		1.50125	84.2925
		1.50458	84.83
		1.50792	85.1806
		1.51125	85.3645
		1.51458	85.409
		1.51792	85.3484
		1.52125	85.2227
		1.52458	85.075
		1.52792	84.9506
		1.53125	84.8936
		1.53458	84.946
		1.53792	85.1468
		1.54125	85.5314
		1.54458	86.1328
		1.54792	86.983
		1.55125	88.1135
		1.55458	89.5568
		1.55792	91.3457
		1.56125	93.5131
		1.56458	96.0901
		1.56792	99.103
		1.57125	102.57
		1.57458	106.5
		1.57792	110.887
		1.58125	115.712
		1.58458	120.938
		1.58792	126.513
		1.59125	132.371
		1.59458	138.432
		1.59792	144.605
		1.60125	150.791
		1.60458	156.885
		1.60792	162.779
		1.61125	168.366
		1.61458	173.542
		1.61792	178.213
		1.62125	182.298
		1.62458	185.735
		1.62792	188.482
		1.63125	190.525
		1.63458	191.878
		1.63792	192.583
		1.64125	192.71
		1.64458	192.351
		1.64792	191.614
		1.65125	190.619
		1.65458	189.485
		1.65792	188.325
		1.66125	187.241
		1.66458	186.313
		1.66792	185.598
		1.67125	185.132
		1.67458	184.923
		1.67792	184.963
		1.68125	185.223
		1.68458	185.665
		1.68792	186.243
		1.69125	186.909
		1.69458	187.616
		1.69792	188.323
		1.70125	188.997
		1.70458	189.609
		1.70792	190.141
		1.71125	190.583
		1.71458	190.926
		1.71792	191.172
		1.72125	191.321
		1.72458	191.377
		1.72792	191.344
		1.73125	191.227
		1.73458	191.031
		1.73792	190.76
		1.74125	190.415
		1.74458	190
		1.74792	189.516
		1.75125	188.966
		1.75458	188.351
		1.75792	187.673
		1.76125	186.935
		1.76458	186.14
		1.76792	185.291
		1.77125	184.392
		1.77458	183.448
		1.77792	182.465
		1.78125	181.446
		1.78458	180.399
		1.78792	179.326
		1.79125	178.234
		1.79458	177.126
		1.79792	176.007
		1.80125	174.879
		1.80458	173.744
		1.80792	172.605
		1.81125	171.461
		1.81458	170.313
		1.81792	169.16
		1.82125	168.002
		1.82458	166.836
		1.82792	165.662
		1.83125	164.479
		1.83458	163.285
		1.83792	162.081
		1.84125	160.868
		1.84458	159.646
		1.84792	158.42
		1.85125	157.194
		1.85458	155.974
		1.85792	154.767
		1.86125	153.581
		1.86458	152.424
		1.86792	151.304
		1.87125	150.228
		1.87458	149.2
		1.87792	148.225
		1.88125	147.301
		1.88458	146.425
		1.88792	145.592
		1.89125	144.792
		1.89458	144.013
		1.89792	143.24
		1.90125	142.46
		1.90458	141.657
		1.90792	140.816
		1.91125	139.925
		1.91458	138.974
		1.91792	137.954
		1.92125	136.861
		1.92458	135.693
		1.92792	134.452
		1.93125	133.142
		1.93458	131.77
		1.93792	130.345
		1.94125	128.879
		1.94458	127.383
		1.94792	125.871
		1.95125	124.356
		1.95458	122.853
		1.95792	121.375
		1.96125	119.936
		1.96458	118.547
		1.96792	117.222
		1.97125	115.969
		1.97458	114.798
		1.97792	113.715
		1.98125	112.728
		1.98458	111.841
		1.98792	111.057
		1.99125	110.38
		1.99458	109.811
		1.99792	109.353
		2.00125	109.008
		2.00458	108.777
		2.00792	108.664
		2.01125	108.673
		2.01458	108.81
		2.01792	109.083
		2.02125	109.504
		2.02458	110.087
		2.02792	110.85
		2.03125	111.817
		2.03458	113.015
		2.03792	114.477
		2.04125	116.238
		2.04458	118.337
		2.04792	120.813
		2.05125	123.702
		2.05458	127.034
		2.05792	130.825
		2.06125	135.074
		2.06458	139.757
		2.06792	144.826
		2.07125	150.205
		2.07458	155.793
		2.07792	161.467
		2.08125	167.092
		2.08458	172.526
		2.08792	177.635
		2.09125	182.301
		2.09458	186.432
		2.09792	189.966
		2.10125	192.877
		2.10458	195.17
		2.10792	196.88
		2.11125	198.065
		2.11458	198.801
		2.11792	199.167
		2.12125	199.247
		2.12458	199.118
		2.12792	198.847
		2.13125	198.492
		2.13458	198.098
		2.13792	197.698
		2.14125	197.318
		2.14458	196.971
		2.14792	196.669
		2.15125	196.416
		2.15458	196.213
		2.15792	196.06
		2.16125	195.955
		2.16458	195.895
		2.16792	195.877
		2.17125	195.897
		2.17458	195.952
		2.17792	196.036
		2.18125	196.143
		2.18458	196.265
		2.18792	196.393
		2.19125	196.515
		2.19458	196.619
		2.19792	196.689
		2.20125	196.71
		2.20458	196.664
		2.20792	196.535
		2.21125	196.307
		2.21458	195.963
		2.21792	195.49
		2.22125	194.878
		2.22458	194.116
		2.22792	193.2
		2.23125	192.125
		2.23458	190.894
		2.23792	189.507
		2.24125	187.972
		2.24458	186.296
		2.24792	184.49
		2.25125	182.568
		2.25458	180.545
		2.25792	178.439
		2.26125	176.271
		2.26458	174.064
		2.26792	171.844
		2.27125	169.638
		2.27458	167.471
		2.27792	165.368
		2.28125	163.35
		2.28458	161.431
		2.28792	159.617
		2.29125	157.908
		2.29458	156.292
		2.29792	154.75
		2.30125	153.26
		2.30458	151.797
		2.30792	150.339
		2.31125	148.873
		2.31458	147.395
		2.31792	145.913
		2.32125	144.449
		2.32458	143.037
		2.32792	141.715
		2.33125	140.53
		2.33458	139.524
		2.33792	138.735
		2.34125	138.191
		2.34458	137.909
		2.34792	137.892
		2.35125	138.134
		2.35458	138.615
		2.35792	139.311
		2.36125	140.189
		2.36458	141.218
		2.36792	142.363
		2.37125	143.593
		2.37458	144.879
		2.37792	146.197
		2.38125	147.528
		2.38458	148.858
		2.38792	150.182
		2.39125	151.501
		2.39458	152.824
		2.39792	154.17
		2.40125	155.565
		2.40458	157.042
		2.40792	158.642
		2.41125	160.412
		2.41458	162.402
		2.41792	164.666
		2.42125	167.252
		2.42458	170.202
		2.42792	173.542
		2.43125	177.268
		2.43458	181.335
		2.43792	185.647
		2.44125	190.051
		2.44458	194.337
		2.44792	198.245
		2.45125	201.483
		2.45458	203.75
		2.45792	204.766
		2.46125	204.311
		2.46458	202.249
		2.46792	198.553
		2.47125	193.315
		2.47458	186.74
		2.47792	179.129
		2.48125	170.851
		2.48458	162.306
		2.48792	153.892
		2.49125	145.97
		2.49458	138.841
		2.49792	132.73
		2.50125	127.783
		2.50458	124.073
		2.50792	121.612
		2.51125	120.367
		2.51458	120.277
		2.51792	121.268
		2.52125	123.261
		2.52458	126.183
		2.52792	129.965
		2.53125	134.544
		2.53458	139.863
		2.53792	145.865
		2.54125	152.49
		2.54458	159.675
		2.54792	167.35
		2.55125	175.438
		2.55458	183.853
		2.55792	192.506
		2.56125	201.301
		2.56458	210.138
		2.56792	218.918
		2.57125	227.544
		2.57458	235.921
		2.57792	243.963
		2.58125	251.588
		2.58458	258.726
		2.58792	265.318
		2.59125	271.313
		2.59458	276.676
		2.59792	281.378
		2.60125	285.407
		2.60458	288.757
		2.60792	291.435
		2.61125	293.453
		2.61458	294.834
		2.61792	295.605
		2.62125	295.799
		2.62458	295.454
		2.62792	294.608
		2.63125	293.303
		2.63458	291.582
		2.63792	289.487
		2.64125	287.061
		2.64458	284.343
		2.64792	281.375
		2.65125	278.192
		2.65458	274.83
		2.65792	271.321
		2.66125	267.695
		2.66458	263.98
		2.66792	260.201
		2.67125	256.38
		2.67458	252.539
		2.67792	248.694
		2.68125	244.863
		2.68458	241.059
		2.68792	237.295
		2.69125	233.581
		2.69458	229.926
		2.69792	226.337
		2.70125	222.82
		2.70458	219.38
		2.70792	216.021
		2.71125	212.744
		2.71458	209.552
		2.71792	206.446
		2.72125	203.426
		2.72458	200.491
		2.72792	197.643
		2.73125	194.878
		2.73458	192.196
		2.73792	189.594
		2.74125	187.072
		2.74458	184.627
		2.74792	182.256
		2.75125	179.958
		2.75458	177.73
		2.75792	175.57
		2.76125	173.476
		2.76458	171.446
		2.76792	169.476
		2.77125	167.566
		2.77458	165.712
		2.77792	163.913
		2.78125	162.166
		2.78458	160.471
		2.78792	158.825
		2.79125	157.226
		2.79458	155.674
		2.79792	154.166
		2.80125	152.701
		2.80458	151.28
		2.80792	149.9
		2.81125	148.562
		2.81458	147.265
		2.81792	146.008
		2.82125	144.792
		2.82458	143.618
		2.82792	142.485
		2.83125	141.395
		2.83458	140.348
		2.83792	139.345
		2.84125	138.386
		2.84458	137.473
		2.84792	136.606
		2.85125	135.786
		2.85458	135.013
		2.85792	134.287
		2.86125	133.608
		2.86458	132.975
		2.86792	132.385
		2.87125	131.837
		2.87458	131.329
		2.87792	130.855
		2.88125	130.413
		2.88458	129.997
		2.88792	129.602
		2.89125	129.221
		2.89458	128.847
		2.89792	128.475
		2.90125	128.097
		2.90458	127.706
		2.90792	127.294
		2.91125	126.856
		2.91458	126.384
		2.91792	125.874
		2.92125	125.32
		2.92458	124.718
		2.92792	124.065
		2.93125	123.36
		2.93458	122.6
		2.93792	121.788
		2.94125	120.924
		2.94458	120.011
		2.94792	119.054
		2.95125	118.058
		2.95458	117.029
		2.95792	115.977
		2.96125	114.908
		2.96458	113.835
		2.96792	112.767
		2.97125	111.716
		2.97458	110.697
		2.97792	109.723
		2.98125	108.808
		2.98458	107.968
		2.98792	107.218
		2.99125	106.574
		2.99458	106.052
		2.99792	105.67
		3.00125	105.443
		3.00458	105.389
		3.00792	105.523
		3.01125	105.862
		3.01458	106.422
		3.01792	107.217
		3.02125	108.263
		3.02458	109.572
		3.02792	111.159
		3.03125	113.034
		3.03458	115.208
		3.03792	117.691
		3.04125	120.49
		3.04458	123.609
		3.04792	127.052
		3.05125	130.819
		3.05458	134.907
		3.05792	139.31
		3.06125	144.019
		3.06458	149.019
		3.06792	154.295
		3.07125	159.825
		3.07458	165.583
		3.07792	171.541
		3.08125	177.666
		3.08458	183.923
		3.08792	190.271
		3.09125	196.67
		3.09458	203.076
		3.09792	209.445
		3.10125	215.732
		3.10458	221.892
		3.10792	227.882
		3.11125	233.659
		3.11458	239.184
		3.11792	244.419
		3.12125	249.333
		3.12458	253.896
		3.12792	258.082
		3.13125	261.873
		3.13458	265.252
		3.13792	268.209
		3.14125	270.738
		3.14458	272.838
		3.14792	274.511
		3.15125	275.763
		3.15458	276.606
		3.15792	277.053
		3.16125	277.12
		3.16458	276.828
		3.16792	276.198
		3.17125	275.254
		3.17458	274.022
		3.17792	272.527
		3.18125	270.799
		3.18458	268.864
		3.18792	266.749
		3.19125	264.482
		3.19458	262.09
		3.19792	259.598
		3.20125	257.03
		3.20458	254.41
		3.20792	251.759
		3.21125	249.097
		3.21458	246.443
		3.21792	243.814
		3.22125	241.225
		3.22458	238.689
		3.22792	236.218
		3.23125	233.822
		3.23458	231.508
		3.23792	229.282
		3.24125	227.151
		3.24458	225.116
		3.24792	223.179
		3.25125	221.341
		3.25458	219.6
		3.25792	217.954
		3.26125	216.401
		3.26458	214.937
		3.26792	213.558
		3.27125	212.259
		3.27458	211.034
		3.27792	209.878
		3.28125	208.787
		3.28458	207.754
		3.28792	206.775
		3.29125	205.845
		3.29458	204.959
		3.29792	204.114
		3.30125	203.305
		3.30458	202.53
		3.30792	201.786
		3.31125	201.07
		3.31458	200.381
		3.31792	199.717
		3.32125	199.076
		3.32458	198.458
		3.32792	197.862
		3.33125	197.287
		3.33458	196.733
		3.33792	196.199
		3.34125	195.685
		3.34458	195.19
		3.34792	194.713
		3.35125	194.254
		3.35458	193.812
		3.35792	193.384
		3.36125	192.971
		3.36458	192.57
		3.36792	192.179
		3.37125	191.797
		3.37458	191.421
		3.37792	191.049
		3.38125	190.678
		3.38458	190.306
		3.38792	189.93
		3.39125	189.548
		3.39458	189.156
		3.39792	188.753
		3.40125	188.334
		3.40458	187.899
		3.40792	187.443
		3.41125	186.965
		3.41458	186.462
		3.41792	185.933
		3.42125	185.374
		3.42458	184.785
		3.42792	184.162
		3.43125	183.505
		3.43458	182.813
		3.43792	182.083
		3.44125	181.314
		3.44458	180.506
		3.44792	179.658
		3.45125	178.77
		3.45458	177.841
		3.45792	176.871
		3.46125	175.862
		3.46458	174.814
		3.46792	173.728
		3.47125	172.605
		3.47458	171.447
		3.47792	170.255
		3.48125	169.034
		3.48458	167.784
		3.48792	166.508
		3.49125	165.211
		3.49458	163.894
		3.49792	162.562
		3.50125	161.217
		3.50458	159.865
		3.50792	158.509
		3.51125	157.153
		3.51458	155.8
		3.51792	154.456
		3.52125	153.123
		3.52458	151.805
		3.52792	150.506
		3.53125	149.229
		3.53458	147.977
		3.53792	146.751
		3.54125	145.555
		3.54458	144.389
		3.54792	143.255
		3.55125	142.154
		3.55458	141.086
		3.55792	140.05
		3.56125	139.046
		3.56458	138.072
		3.56792	137.127
		3.57125	136.209
		3.57458	135.316
		3.57792	134.445
		3.58125	133.592
		3.58458	132.756
		3.58792	131.932
		3.59125	131.118
		3.59458	130.309
		3.59792	129.504
		3.60125	128.699
		3.60458	127.89
		3.60792	127.076
		3.61125	126.254
		3.61458	125.422
		3.61792	124.578
		3.62125	123.721
		3.62458	122.849
		3.62792	121.963
		3.63125	121.062
		3.63458	120.144
		3.63792	119.212
		3.64125	118.266
		3.64458	117.306
		3.64792	116.334
		3.65125	115.351
		3.65458	114.359
		3.65792	113.36
		3.66125	112.357
		3.66458	111.352
		3.66792	110.347
		3.67125	109.346
		3.67458	108.352
		3.67792	107.369
		3.68125	106.4
		3.68458	105.449
		3.68792	104.521
		3.69125	103.621
		3.69458	102.755
		3.69792	101.927
		3.70125	101.146
		3.70458	100.417
		3.70792	99.7493
		3.71125	99.1514
		3.71458	98.6328
		3.71792	98.2042
		3.72125	97.8769
		3.72458	97.6635
		3.72792	97.5772
		3.73125	97.6324
		3.73458	97.8445
		3.73792	98.2296
		3.74125	98.8046
		3.74458	99.5868
		3.74792	100.594
		3.75125	101.846
		3.75458	103.358
		3.75792	105.151
		3.76125	107.24
		3.76458	109.644
		3.76792	112.376
		3.77125	115.451
		3.77458	118.881
		3.77792	122.675
		3.78125	126.841
		3.78458	131.382
		3.78792	136.299
		3.79125	141.59
		3.79458	147.248
		3.79792	153.264
		3.80125	159.623
		3.80458	166.308
		3.80792	173.297
		3.81125	180.566
		3.81458	188.086
		3.81792	195.826
		3.82125	203.75
		3.82458	211.823
		3.82792	220.004
		3.83125	228.253
		3.83458	236.529
		3.83792	244.79
		3.84125	252.995
		3.84458	261.101
		3.84792	269.07
		3.85125	276.863
		3.85458	284.445
		3.85792	291.782
		3.86125	298.843
		3.86458	305.602
		3.86792	312.033
		3.87125	318.117
		3.87458	323.835
		3.87792	329.175
		3.88125	334.126
		3.88458	338.682
		3.88792	342.839
		3.89125	346.599
		3.89458	349.963
		3.89792	352.938
		3.90125	355.532
		3.90458	357.755
		3.90792	359.62
		3.91125	361.14
		3.91458	362.329
		3.91792	363.205
		3.92125	363.783
		3.92458	364.081
		3.92792	364.115
		3.93125	363.904
		3.93458	363.464
		3.93792	362.812
		3.94125	361.963
		3.94458	360.934
		3.94792	359.739
		3.95125	358.392
		3.95458	356.907
		3.95792	355.297
		3.96125	353.572
		3.96458	351.745
		3.96792	349.826
		3.97125	347.823
		3.97458	345.745
		3.97792	343.6
		3.98125	341.394
		3.98458	339.135
		3.98792	336.828
		3.99125	334.477
		3.99458	332.089
		3.99792	329.666
		4.00125	327.214
		4.00458	324.736
		4.00792	322.234
		4.01125	319.713
		4.01458	317.176
		4.01792	314.624
		4.02125	312.06
		4.02458	309.487
		4.02792	306.908
		4.03125	304.323
		4.03458	301.737
		4.03792	299.15
		4.04125	296.566
		4.04458	293.986
		4.04792	291.413
		4.05125	288.849
		4.05458	286.297
		4.05792	283.761
		4.06125	281.242
		4.06458	278.744
		4.06792	276.271
		4.07125	273.826
		4.07458	271.413
		4.07792	269.036
		4.08125	266.701
		4.08458	264.412
		4.08792	262.174
		4.09125	259.993
		4.09458	257.876
		4.09792	255.828
		4.10125	253.855
		4.10458	251.965
		4.10792	250.164
		4.11125	248.457
		4.11458	246.852
		4.11792	245.355
		4.12125	243.97
		4.12458	242.703
		4.12792	241.559
		4.13125	240.541
		4.13458	239.653
		4.13792	238.895
		4.14125	238.268
		4.14458	237.773
		4.14792	237.405
		4.15125	237.163
		4.15458	237.04
		4.15792	237.03
		4.16125	237.125
		4.16458	237.316
		4.16792	237.592
		4.17125	237.941
		4.17458	238.351
		4.17792	238.807
		4.18125	239.296
		4.18458	239.802
		4.18792	240.309
		4.19125	240.803
		4.19458	241.268
		4.19792	241.689
		4.20125	242.051
		4.20458	242.34
		4.20792	242.545
		4.21125	242.652
		4.21458	242.652
		4.21792	242.536
		4.22125	242.295
		4.22458	241.924
		4.22792	241.418
		4.23125	240.773
		4.23458	239.988
		4.23792	239.063
		4.24125	237.998
		4.24458	236.796
		4.24792	235.46
		4.25125	233.995
		4.25458	232.406
		4.25792	230.7
		4.26125	228.883
		4.26458	226.963
		4.26792	224.949
		4.27125	222.847
		4.27458	220.668
		4.27792	218.42
		4.28125	216.111
		4.28458	213.751
		4.28792	211.348
		4.29125	208.911
		4.29458	206.449
		4.29792	203.97
		4.30125	201.483
		4.30458	198.995
		4.30792	196.516
		4.31125	194.053
		4.31458	191.615
		4.31792	189.21
		4.32125	186.846
		4.32458	184.532
		4.32792	182.277
		4.33125	180.09
		4.33458	177.981
		4.33792	175.96
		4.34125	174.037
		4.34458	172.224
		4.34792	170.532
		4.35125	168.976
		4.35458	167.567
		4.35792	166.32
		4.36125	165.251
		4.36458	164.374
		4.36792	163.707
		4.37125	163.264
		4.37458	163.065
		4.37792	163.125
		4.38125	163.462
		4.38458	164.093
		4.38792	165.034
		4.39125	166.3
		4.39458	167.906
		4.39792	169.863
		4.40125	172.184
		4.40458	174.876
		4.40792	177.946
		4.41125	181.397
		4.41458	185.23
		4.41792	189.442
		4.42125	194.026
		4.42458	198.974
		4.42792	204.273
		4.43125	209.905
		4.43458	215.851
		4.43792	222.089
		4.44125	228.594
		4.44458	235.337
		4.44792	242.288
		4.45125	249.416
		4.45458	256.689
		4.45792	264.072
		4.46125	271.532
		4.46458	279.037
		4.46792	286.553
		4.47125	294.051
		4.47458	301.502
		4.47792	308.879
		4.48125	316.158
		4.48458	323.317
		4.48792	330.338
		4.49125	337.205
		4.49458	343.906
		4.49792	350.43
		4.50125	356.771
		4.50458	362.925
		4.50792	368.889
		4.51125	374.662
		4.51458	380.247
		4.51792	385.644
		4.52125	390.858
		4.52458	395.891
		4.52792	400.747
		4.53125	405.428
		4.53458	409.937
		4.53792	414.274
		4.54125	418.44
		4.54458	422.434
		4.54792	426.254
		4.55125	429.896
		4.55458	433.355
		4.55792	436.625
		4.56125	439.699
		4.56458	442.568
		4.56792	445.225
		4.57125	447.66
		4.57458	449.862
		4.57792	451.824
		4.58125	453.535
		4.58458	454.986
		4.58792	456.171
		4.59125	457.082
		4.59458	457.713
		4.59792	458.06
		4.60125	458.119
		4.60458	457.89
		4.60792	457.372
		4.61125	456.568
		4.61458	455.48
		4.61792	454.114
		4.62125	452.476
		4.62458	450.575
		4.62792	448.42
		4.63125	446.021
		4.63458	443.391
		4.63792	440.54
		4.64125	437.483
		4.64458	434.232
		4.64792	430.802
		4.65125	427.205
		4.65458	423.458
		4.65792	419.572
		4.66125	415.562
		4.66458	411.442
		4.66792	407.223
		4.67125	402.92
		4.67458	398.544
		4.67792	394.106
		4.68125	389.617
		4.68458	385.088
		4.68792	380.528
		4.69125	375.945
		4.69458	371.348
		4.69792	366.745
		4.70125	362.141
		4.70458	357.544
		4.70792	352.958
		4.71125	348.388
		4.71458	343.839
		4.71792	339.315
		4.72125	334.818
		4.72458	330.352
		4.72792	325.919
		4.73125	321.522
		4.73458	317.161
		4.73792	312.839
		4.74125	308.557
		4.74458	304.315
		4.74792	300.115
		4.75125	295.957
		4.75458	291.842
		4.75792	287.771
		4.76125	283.743
		4.76458	279.76
		4.76792	275.822
		4.77125	271.928
		4.77458	268.078
		4.77792	264.274
		4.78125	260.514
		4.78458	256.799
		4.78792	253.129
		4.79125	249.503
		4.79458	245.923
		4.79792	242.387
		4.80125	238.896
		4.80458	235.45
		4.80792	232.048
		4.81125	228.69
		4.81458	225.376
		4.81792	222.106
		4.82125	218.881
		4.82458	215.699
		4.82792	212.56
		4.83125	209.465
		4.83458	206.413
		4.83792	203.404
		4.84125	200.437
		4.84458	197.514
		4.84792	194.633
		4.85125	191.794
		4.85458	188.998
		4.85792	186.244
		4.86125	183.532
		4.86458	180.862
		4.86792	178.234
		4.87125	175.649
		4.87458	173.106
		4.87792	170.605
		4.88125	168.146
		4.88458	165.729
		4.88792	163.355
		4.89125	161.023
		4.89458	158.733
		4.89792	156.486
		4.90125	154.282
		4.90458	152.12
		4.90792	150.001
		4.91125	147.926
		4.91458	145.893
		4.91792	143.903
		4.92125	141.957
		4.92458	140.053
		4.92792	138.193
		4.93125	136.376
		4.93458	134.602
		4.93792	132.873
		4.94125	131.187
		4.94458	129.546
		4.94792	127.95
		4.95125	126.399
		4.95458	124.894
		4.95792	123.437
		4.96125	122.027
		4.96458	120.666
		4.96792	119.355
		4.97125	118.096
		4.97458	116.89
		4.97792	115.74
		4.98125	114.648
		4.98458	113.614
		4.98792	112.642
		4.99125	111.734
		4.99458	110.892
		4.99792	110.118
		5.00125	109.415
		5.00458	108.784
		5.00792	108.227
		5.01125	107.746
		5.01458	107.342
		5.01792	107.017
		5.02125	106.769
		5.02458	106.601
		5.02792	106.51
		5.03125	106.495
		5.03458	106.556
		5.03792	106.688
		5.04125	106.89
		5.04458	107.157
		5.04792	107.486
		5.05125	107.87
		5.05458	108.303
		5.05792	108.781
		5.06125	109.295
		5.06458	109.838
		5.06792	110.403
		5.07125	110.981
		5.07458	111.565
		5.07792	112.147
		5.08125	112.718
		5.08458	113.27
		5.08792	113.797
		5.09125	114.289
		5.09458	114.741
		5.09792	115.145
		5.10125	115.496
		5.10458	115.789
		5.10792	116.019
		5.11125	116.181
		5.11458	116.273
		5.11792	116.293
		5.12125	116.237
		5.12458	116.106
		5.12792	115.9
		5.13125	115.617
		5.13458	115.26
		5.13792	114.83
		5.14125	114.329
		5.14458	113.759
		5.14792	113.123
		5.15125	112.425
		5.15458	111.668
		5.15792	110.856
		5.16125	109.992
		5.16458	109.082
		5.16792	108.128
		5.17125	107.135
		5.17458	106.108
		5.17792	105.05
		5.18125	103.965
		5.18458	102.857
		5.18792	101.73
		5.19125	100.587
		5.19458	99.431
		5.19792	98.2661
		5.20125	97.0945
		5.20458	95.9192
		5.20792	94.7424
		5.21125	93.5666
		5.21458	92.3938
		5.21792	91.2256
		5.22125	90.064
		5.22458	88.9103
		5.22792	87.7658
		5.23125	86.6317
		5.23458	85.5091
		5.23792	84.3987
		5.24125	83.3012
		5.24458	82.2173
		5.24792	81.1473
		5.25125	80.0917
		5.25458	79.0506
		5.25792	78.0242
		5.26125	77.0126
		5.26458	76.0159
		5.26792	75.034
		5.27125	74.0668
		5.27458	73.1143
		5.27792	72.1763
		5.28125	71.2528
		5.28458	70.3434
		5.28792	69.4483
		5.29125	68.5672
		5.29458	67.6999
		5.29792	66.8463
		5.30125	66.0065
		5.30458	65.1802
		5.30792	64.3675
		5.31125	63.5684
		5.31458	62.7828
		5.31792	62.0109
		5.32125	61.2527
		5.32458	60.5084
		5.32792	59.778
		5.33125	59.0619
		5.33458	58.3602
		5.33792	57.6732
		5.34125	57.0012
		5.34458	56.3446
		5.34792	55.7036
		5.35125	55.0787
		5.35458	54.4705
		5.35792	53.8792
		5.36125	53.3054
		5.36458	52.7498
		5.36792	52.2128
		5.37125	51.6949
		5.37458	51.1966
		5.37792	50.7184
		5.38125	50.2606
		5.38458	49.8237
		5.38792	49.4078
		5.39125	49.0132
		5.39458	48.64
		5.39792	48.2882
		5.40125	47.9578
		5.40458	47.6488
		5.40792	47.3609
		5.41125	47.0939
		5.41458	46.8475
		5.41792	46.6211
		5.42125	46.4142
		5.42458	46.2261
		5.42792	46.056
		5.43125	45.9031
		5.43458	45.7663
		5.43792	45.6445
		5.44125	45.5368
		5.44458	45.4417
		5.44792	45.3583
		5.45125	45.2852
		5.45458	45.2212
		5.45792	45.165
		5.46125	45.1154
		5.46458	45.0712
		5.46792	45.0312
		5.47125	44.9945
		5.47458	44.9598
		5.47792	44.9263
		5.48125	44.893
		5.48458	44.8592
		5.48792	44.824
		5.49125	44.7867
		5.49458	44.7468
		5.49792	44.7036
		5.50125	44.6569
		5.50458	44.6061
		5.50792	44.5511
		5.51125	44.4918
		5.51458	44.428
		5.51792	44.3597
		5.52125	44.287
		5.52458	44.2099
		5.52792	44.1286
		5.53125	44.0432
		5.53458	43.9539
		5.53792	43.8609
		5.54125	43.7644
		5.54458	43.6646
		5.54792	43.5617
		5.55125	43.456
		5.55458	43.3474
		5.55792	43.2363
		5.56125	43.1227
		5.56458	43.0065
		5.56792	42.8878
		5.57125	42.7665
		5.57458	42.6426
		5.57792	42.5158
		5.58125	42.386
		5.58458	42.2531
		5.58792	42.1168
		5.59125	41.9768
		5.59458	41.8331
		5.59792	41.6852
		5.60125	41.5331
		5.60458	41.3764
		5.60792	41.2149
		5.61125	41.0483
		5.61458	40.8766
		5.61792	40.6995
		5.62125	40.517
		5.62458	40.3289
		5.62792	40.1351
		5.63125	39.9358
		5.63458	39.7308
		5.63792	39.5202
		5.64125	39.3041
		5.64458	39.0827
		5.64792	38.856
		5.65125	38.6242
		5.65458	38.3875
		5.65792	38.1461
		5.66125	37.9001
		5.66458	37.6499
		5.66792	37.3956
		5.67125	37.1376
		5.67458	36.8761
		5.67792	36.6114
		5.68125	36.3439
		5.68458	36.0737
		5.68792	35.8014
		5.69125	35.527
		5.69458	35.251
		5.69792	34.9734
		5.70125	34.6949
		5.70458	34.4154
		5.70792	34.1353
		5.71125	33.855
		5.71458	33.5747
		5.71792	33.2945
		5.72125	33.0147
		5.72458	32.7354
		5.72792	32.4569
		5.73125	32.1792
		5.73458	31.9027
		5.73792	31.6272
		5.74125	31.3532
		5.74458	31.0807
		5.74792	30.8098
		5.75125	30.5406
		5.75458	30.2733
		5.75792	30.008
		5.76125	29.7447
		5.76458	29.4837
		5.76792	29.2249
		5.77125	28.9683
		5.77458	28.7141
		5.77792	28.4623
		5.78125	28.213
		5.78458	27.9663
		5.78792	27.7221
		5.79125	27.4805
		5.79458	27.2415
		5.79792	27.0053
		5.80125	26.7718
		5.80458	26.5411
		5.80792	26.3134
		5.81125	26.0886
		5.81458	25.8669
		5.81792	25.6483
		5.82125	25.4329
		5.82458	25.2209
		5.82792	25.0121
		5.83125	24.8067
		5.83458	24.6047
		5.83792	24.406
		5.84125	24.2106
		5.84458	24.0188
		5.84792	23.8304
		5.85125	23.6456
		5.85458	23.4644
		5.85792	23.2869
		5.86125	23.1131
		5.86458	22.9429
		5.86792	22.7764
		5.87125	22.6135
		5.87458	22.4542
		5.87792	22.2984
		5.88125	22.1461
		5.88458	21.9972
		5.88792	21.8517
		5.89125	21.7096
		5.89458	21.5707
		5.89792	21.435
		5.90125	21.3025
		5.90458	21.1729
		5.90792	21.0463
		5.91125	20.9223
		5.91458	20.8009
		5.91792	20.6819
		5.92125	20.5651
		5.92458	20.4504
		5.92792	20.3377
		5.93125	20.2268
		5.93458	20.1176
		5.93792	20.0101
		5.94125	19.9041
		5.94458	19.7995
		5.94792	19.6962
		5.95125	19.5941
		5.95458	19.4932
		5.95792	19.3934
		5.96125	19.2947
		5.96458	19.1969
		5.96792	19.1
		5.97125	19.0038
		5.97458	18.9084
		5.97792	18.8135
		5.98125	18.7193
		5.98458	18.6255
		5.98792	18.5323
		5.99125	18.4395
		5.99458	18.3474
		5.99792	18.2558
		6.00125	18.1647
		6.00458	18.0743
		6.00792	17.9846
		6.01125	17.8956
		6.01458	17.8074
		6.01792	17.7199
		6.02125	17.6334
		6.02458	17.5478
		6.02792	17.4633
		6.03125	17.3798
		6.03458	17.2976
		6.03792	17.2165
		6.04125	17.1368
		6.04458	17.0584
		6.04792	16.9815
		6.05125	16.9061
		6.05458	16.8321
		6.05792	16.7598
		6.06125	16.6891
		6.06458	16.62
		6.06792	16.5527
		6.07125	16.4872
		6.07458	16.4235
		6.07792	16.3615
		6.08125	16.3013
		6.08458	16.2428
		6.08792	16.1861
		6.09125	16.131
		6.09458	16.0776
		6.09792	16.0258
		6.10125	15.9758
		6.10458	15.9276
		6.10792	15.881
		6.11125	15.8361
		6.11458	15.7928
		6.11792	15.7511
		6.12125	15.7109
		6.12458	15.6719
		6.12792	15.6342
		6.13125	15.5976
		6.13458	15.5619
		6.13792	15.5272
		6.14125	15.4932
		6.14458	15.4599
		6.14792	15.4273
		6.15125	15.3952
		6.15458	15.3635
		6.15792	15.3322
		6.16125	15.3011
		6.16458	15.2701
		6.16792	15.2391
		6.17125	15.2079
		6.17458	15.1765
		6.17792	15.1448
		6.18125	15.1127
		6.18458	15.0802
		6.18792	15.0472
		6.19125	15.0138
		6.19458	14.9801
		6.19792	14.946
		6.20125	14.9116
		6.20458	14.877
		6.20792	14.842
		6.21125	14.8067
		6.21458	14.7712
		6.21792	14.7353
		6.22125	14.6991
		6.22458	14.6624
		6.22792	14.6254
		6.23125	14.5881
		6.23458	14.5503
		6.23792	14.5123
		6.24125	14.474
		6.24458	14.4355
		6.24792	14.3968
		6.25125	14.3579
		6.25458	14.3189
		6.25792	14.2798
		6.26125	14.2406
		6.26458	14.2012
		6.26792	14.1619
		6.27125	14.1225
		6.27458	14.083
		6.27792	14.0437
		6.28125	14.0044
		6.28458	13.9652
		6.28792	13.9261
		6.29125	13.8872
		6.29458	13.8484
		6.29792	13.8097
		6.30125	13.7713
		6.30458	13.7329
		6.30792	13.6948
		6.31125	13.6569
		6.31458	13.6193
		6.31792	13.5821
		6.32125	13.5452
		6.32458	13.5089
		6.32792	13.473
		6.33125	13.4376
		6.33458	13.4029
		6.33792	13.3686
		6.34125	13.335
		6.34458	13.3018
		6.34792	13.2694
		6.35125	13.2374
		6.35458	13.206
		6.35792	13.1752
		6.36125	13.1451
		6.36458	13.1157
		6.36792	13.0869
		6.37125	13.0588
		6.37458	13.0315
		6.37792	13.0048
		6.38125	12.9788
		6.38458	12.9535
		6.38792	12.9287
		6.39125	12.9045
		6.39458	12.8807
		6.39792	12.8576
		6.40125	12.835
		6.40458	12.8129
		6.40792	12.7914
		6.41125	12.7704
		6.41458	12.75
		6.41792	12.7302
		6.42125	12.711
		6.42458	12.6924
		6.42792	12.6742
		6.43125	12.6565
		6.43458	12.6392
		6.43792	12.6222
		6.44125	12.6055
		6.44458	12.589
		6.44792	12.5729
		6.45125	12.557
		6.45458	12.5415
		6.45792	12.5262
		6.46125	12.5114
		6.46458	12.4969
		6.46792	12.4829
		6.47125	12.4694
		6.47458	12.4562
		6.47792	12.4434
		6.48125	12.431
		6.48458	12.4189
		6.48792	12.4074
		6.49125	12.3962
		6.49458	12.3856
		6.49792	12.3755
		6.50125	12.3662
		6.50458	12.3576
		6.50792	12.35
		6.51125	12.3433
		6.51458	12.3378
		6.51792	12.3336
		6.52125	12.3307
		6.52458	12.3294
		6.52792	12.3298
		6.53125	12.332
		6.53458	12.3361
		6.53792	12.3424
		6.54125	12.3511
		6.54458	12.3622
		6.54792	12.3762
		6.55125	12.393
		6.55458	12.4129
		6.55792	12.4361
		6.56125	12.4626
		6.56458	12.4928
		6.56792	12.5266
		6.57125	12.5642
		6.57458	12.6056
		6.57792	12.651
		6.58125	12.7003
		6.58458	12.7537
		6.58792	12.8111
		6.59125	12.8725
		6.59458	12.9381
		6.59792	13.0077
		6.60125	13.0814
		6.60458	13.1591
		6.60792	13.2406
		6.61125	13.3259
		6.61458	13.4148
		6.61792	13.5069
		6.62125	13.6021
		6.62458	13.7001
		6.62792	13.8004
		6.63125	13.9029
		6.63458	14.0072
		6.63792	14.1128
		6.64125	14.2196
		6.64458	14.3271
		6.64792	14.4349
		6.65125	14.5428
		6.65458	14.6502
		6.65792	14.7567
[truncated: 4,003 more rows]

## Sheet: 4F
				Fig 4F. Concentration-inhibition curves of dHN, UV-treated dHN, dHNN and UV-treated dHNN
			X axis	y axis: Inhibition (%)								X axis	y axis: Inhibition (%)
			log (μM)	dHN			dHN(UV)					log (μM)	dHNN			dHNN(UV)
			2	1.33604	-0.07511	0.743751	0.451915	-1.07376	-5.18778			2.30103	94.6869	93.3656	90.7148	90.2659	89.8971	89.2671
			1.69897	6.82921	9.08139	6.37606	7.38825	7.3353	5.43898			1.69897	92.1318	91.6453	91.3329	86.6605	86.7371	86.8629
			1.39794	4.36153	4.04384	4.89595	6.46349	6.25662	3.70152			1.09691	78.0812	79.9754	78.6607	68.017	69.6679	66.5447
			1.09691	4.27041	1.49489	3.43677	6.23569	7.9436	2.01699			0.49485	37.53	41.3536	43.1523	33.8823	29.6298	43.8389
			0.79588	2.49723	2.09334	1.61064	4.76296	4.43911	2.07487			-0.10721	24.6133	16.0406	16.1313	15.9622	14.9667	5.25278
			0.49485	3.70028	1.56385	3.36904	5.29245	3.93548	2.18323			-0.70927	14.9264	17.449	18.6905	11.4241	8.59208	11.4087
			0.19382	3.42938	2.81739	4.678	7.02007	5.95493	5.54735			-1.31133	10.4791	11.8179	14.8471	12.3241	7.8898	10.5523
