# Supplementary material for: Permeant fluorescent probes visualize the activation of SARM1 and uncover an anti-neurodegenerative drug candidate
Source: eLife. 2021 May 4;10:e67381. doi: 10.7554/eLife.67381 (PMC8143800; doi:10.7554/eLife.67381)
Supplement: Figure 5—figure supplement 1—source data 1. [file elife-67381-fig5-figsupp1-data1.xlsx]

## Sheet: Fig5-supp1A,B
					Fig5-s1A,B. Quantification of the intensity of the dHNN-modified peptides, normalized with the intensity of the corresponding peptides
						The abundance of each peptide was determined in the MS1							Abundance ratio
						total peptide			modified peptide				modified-peptide/total-peptide (%)
						0	5 μM	50 μM	0	5 μM	50 μM			0	5 μM	50 μM
					C117	5.91772e+09	5.60984e+09	4.76706e+09	0	1.82947e+06	8.84731e+06		C117	0	0.0326119	0.185593
					C226	4.75491e+09	4.21506e+09	4.18583e+09	0	1.62623e+06	4.91246e+06		C226	0	0.0385814	0.117359
					C233	4.75491e+09	4220365914	4.2124e+09	0	698570	1.17954e+06		C233	0	0.0165524	0.0280017
					C311	2.11981e+09	1.95254e+09	1.37911e+09	0	8.00067e+06	3.37604e+07		C311	0	0.409757	2.44798
					C482	9.28342e+08	9.36729e+08	1.04707e+09	0	266123	1.86267e+06		C482	0	0.0284098	0.177893
					C508	3.88121e+09	4.11587e+09	3.47581e+09	0	1.02223e+06	1.40856e+06		C508	0	0.0248363	0.0405246
					C552	3.75619e+09	3.18695e+09	2.11253e+09	0	529065	2123043		C552	0	0.016601	0.100498
					C649	4.83038e+09	4.90827e+09	4.34615e+09	0	259503	2.58968e+06		C649	0	0.00528705	0.0595855

## Sheet: Fig5-supp1C
					Fig5-s1C. The abundance ratio of dHNN-modified peptides to the total cysteine-containing peptides identified in SARM1 and other proteins
												Abundance ratio
						total peptide			modified peptide			modified-peptide/total-peptide (%)
						0	5 μM	50 μM	0	5 μM	50 μM	0	5 μM	50 μM
					SARM1	3.51895e+10	3.49424e+10	2.98292e+10	0	1.42319e+07	5.66836e+07	0	0.0407294	0.190027
					Others	2.6839e+08	2.52417e+08	2.27451e+08	0	0	0	0	0	0

## Sheet: Fig5-supp4B
		Fig5-s5B. Images were capture at 0, 24, 48 h
		X axis	Y axis: AxD index
		Time (h)	uncut			cut			dHNN
		0	0.0553825	0.0713115	0.111791	0.142061	0.084754	0.073731	0.0475705	0.100093	0.093775
		24	0.0455605	0.0708335	0.0845265	0.683471	0.540492	0.452294	0.120277	0.160976	0.13663
		48	0.061234	0.0491385	0.068748	0.728045	0.57476	0.51181	0.192114	0.209888	0.088807
						P value (T test)
					Time (h)	cut vs dHNN
					0	0.504249
					24	0.003581
					48	0.004067
