# Supplementary material for: Permeant fluorescent probes visualize the activation of SARM1 and uncover an anti-neurodegenerative drug candidate
Source: eLife. 2021 May 4;10:e67381. doi: 10.7554/eLife.67381 (PMC8143800; doi:10.7554/eLife.67381)
Supplement: Figure 5—source data 1. [file elife-67381-fig5-data1.xlsx]

## Sheet: 5A
	Fig 5A. Inhibition of SARM1-dN and SAM-TIR by dHNN in vitro
	X axis	y axis: Inhibition (%)							log(inhibitor) vs. normalized response -- Variable slope
	log (μM)	SARM1-dN			SAM-TIR				95% CI (profile likelihood)
	2.30103	92.7715	92.5546	91.3677	49.8579	48.3243	55.5151			SARM1-dN	SAM-TIR
	1.60206	88.6207	84.1682	85.3209	24.8711	20.8013	19.7139		LogIC50	0.5543 to 0.6840	2.155 to 2.450
	0.90309	67.306	60.7564	66.5632	11.9311	7.38063	4.42543		HillSlope	0.7074 to 0.9265	0.5939 to 1.053
	0.20412	30.7148	31.3907	28.234	1.99588	-6.025	13.6841		IC50	3.584 to 4.830	143.0 to 281.8

## Sheet: 5B
			Fig 5B. Inhibition of SARM1-dN and SAM-TIR by dHNN in cellulo.
				cADPR level normalized to CTRL (T0)
				iSARM1			iSAM-TIR
			0 h	0.917399	0.766461	1.01256	1.01206	0.909192	1.04005
			12 h	0.138804	0.154033	0.142247	0.760784	0.924056	0.947455

## Sheet: 5D
		Fig 5D. The dHNN-IC50s were measured by PC6 assay
		x axis: log [dHNN (μM)]	2	1.30103	0.60206	-0.09691			log(inhibitor) vs. normalized response -- Variable slope
	y axis: inhibition (%)	WT	97.454	85.6535	34.913	6.13967			95% CI (profile likelihood)
			96.9882	84.3222	26.1423	2.55098				LogIC50	HillSlope	IC50
			96.9789	87.4418	38.7431	10.0096			WT	0.7438 to 0.8488	1.270 to 1.760	5.543 to 7.060
		117	94.3158	86.6032	35.7118	5.10843			117	0.7242 to 0.8405	1.255 to 1.829	5.299 to 6.926
			95.0469	84.8517	26.7881	3.91811			199	0.7462 to 0.8806	1.087 to 1.597	5.574 to 7.597
			94.8159	89.1392	40.9843	6.73702			215	1.359 to 1.614	0.7625 to 1.279	22.88 to 41.09
		199	91.4268	82.5786	35.4851	11.8547			226	0.9247 to 1.196	0.5791 to 0.9249	8.408 to 15.71
			92.0105	83.3839	31.8794	7.41007			233	0.7993 to 0.8762	1.417 to 1.798	6.299 to 7.519
			91.2001	84.3644	33.9973	0.008909			271	0.7049 to 0.8772	1.102 to 1.900	5.068 to 7.537
		233	95.2585	82.8873	31.0404	5.14264			311	1.081 to 1.221	1.068 to 1.551	12.05 to 16.63
			95.6724	89.3353	25.8451	4.06981			343	0.7911 to 1.111	0.8313 to 1.885	6.182 to 12.90
			96.3553	83.9726	30.6173	3.57639			350	0.8180 to 0.9010	1.233 to 1.560	6.576 to 7.962
		271	91.4395	85.2816	37.0031	2.54376			430	0.7475 to 0.8671	1.138 to 1.589	5.592 to 7.364
			87.9427	86.7681	27.0845	3.72068			482	0.8273 to 1.001	1.045 to 1.619	6.719 to 10.02
			90.1442	85.501	41.5537	4.48417			508	0.7388 to 0.9241	1.018 to 1.720	5.481 to 8.396
		311	92.5308	57.9103	17.0407	3.12753			527	0.8070 to 0.9595	1.213 to 1.832	6.412 to 9.110
			97.6196	55.8229	11.3647	2.12077			552	0.4246 to 0.5635	0.9799 to 1.438	2.658 to 3.660
			95.0621	64.5571	22.9098	9.84331			629	0.5544 to 0.7131	1.076 to 1.833	3.584 to 5.165
		343	85.1475	84.6184	35.507	-2.17494			635	0.8539 to 0.9573	1.269 to 1.688	7.144 to 9.063
			84.4556	70.0298	11.5912	-6.87512			649	0.7600 to 0.8788	1.279 to 1.840	5.755 to 7.564
			88.1309	74.6183	34.6081	10.5467
		350	94.28	81.9887	29.6958	4.20141
			95.7502	79.8684	26.2518	7.50937
			94.7362	83.3224	32.2638	8.31149
		430	95.017	83.0067	37.6682	4.08929
			95.7539	80.027	25.7171	6.59329
			96.0889	86.1141	38.8457	9.55493
		482	94.6385	79.2382	27.8696	5.40207
			96.6463	68.2147	18.1706	2.39279
			95.6801	81.6635	37.8775	7.74384
		508	94.1469	85.1591	37.2914	14.8916
			94.3499	75.1735	21.4211	4.83434
			94.333	87.1428	36.117	6.48541
		527	96.1324	80.3735	27.9904	-0.26314
			97.0556	74.621	19.1857	0.51069
			96.5993	87.08	37.0972	5.18687
		552	93.1195	88.6425	60.2877	12.8556
			93.7858	88.5296	52.0725	16.7944
			93.7148	88.9757	65.0219	14.9231
		629	94.676	92.3896	45.9991	12.6904
			94.2071	91.6301	36.9173	10.1112
			96.7288	95.4212	51.1722	16.1625
		635	97.6288	79.4554	26.7829	9.64359
			97.1164	74.4353	22.1391	5.5326
			97.8574	84.9127	28.0135	2.368
		649	96.5961	84.9834	34.7953	8.56327
			96.2195	82.7851	22.6738	1.08362
			96.9698	87.7318	36.6752	5.12779

## Sheet: 5H
				Fig 5H. The cellular cADPR contents
					pmol cADPR/mg protein
				Control	19.3083	14.3947	14.9009
				50 nM VCR	102.087	121.222	123.907
				50 nM VCR+5 μM dHNN	69.0077	81.7464	84.1766
				50 nM VCR+10 μM dHNN	50.8249	40.8786	39.6998

## Sheet: 5J
			Fig 5J. Quantification of AxD indices after 0, 24, 48, 72 h treatment with VCR
			X axis	y axis: AxD index
			Time (h)	DMSO				VCR				dHNN
			0	0.1562	0.103209	0.112288	0.112594	0.128251	0.091424	0.110414	0.116284	0.169211	0.147492	0.112439	0.160807
			24	0.126215	0.123682	0.117407	0.136274	0.2132	0.122835	0.143297	0.196051	0.156202	0.206357	0.174879	0.212185
			48	0.140463	0.123609	0.118238	0.099864	0.357609	0.29117	0.357736	0.347208	0.148914	0.255508	0.16512	NA
			72	0.133514	0.098768	0.092944	0.114176	0.429881	0.342273	0.28823	0.478772	0.1431	0.165919	0.167784	0.232887
						Time (h)	P value (VCR vs dHNN)
						0	0.050103
						24	0.488121
						48	0.006838
						72	0.004497
