# Supplementary material for: Permeant fluorescent probes visualize the activation of SARM1 and uncover an anti-neurodegenerative drug candidate
Source: eLife. 2021 May 4;10:e67381. doi: 10.7554/eLife.67381 (PMC8143800; doi:10.7554/eLife.67381)
Supplement: Supplementary file 1. [file elife-67381-supp1.xlsx]

## Sheet: Sheet1
	Refinement statistics for the SAMR1-dHNN structure.
	Model
	Composition(#)
	Chains	16
	Atoms	40120 (Hydrogens: 0)
	Residues	Protein: 5112 Nucleotide: 0
	Water	0
	Ligands	LIG: 8
	Bonds (RMSD)
	Length (Å) (# > 4σ)	0.006 (0)
	Angles (°) (# > 4σ)	0.909 (0)
	MolProbity score	1.49
	Clash score	5.07
	Ramachandran plot (%)
	Outliers	0.00
	Allowed	3.46
	Favored	96.54
	Rotamer outliers (%)	0.00
	Cβ outliers (%)	0.17
	Peptide plane (%)
	Cis proline/general	0.0/0.0
	Twisted proline/general	0.0/0.0
	CaBLAM outliers (%)	3.49
	ADP (B-factors)
	Iso/Aniso (#)	40120/0
	min/max/mean
	Protein	39.19/185.58/101.29
	Ligand	113.78/126.07/124.05
	Occupancy
	Mean	1.00
	occ = 1 (%)	100
	0 < occ < 1 (%)	0
	occ > 1 (%)	0
	Data
	Box
	Lengths (Å)	214.12, 214.12, 90.38
	Angles (°)	90.00, 90.00, 90.00
	Supplied Resolution (Å)	2.4
	Resolution Estimates (Å)	Masked	Unmasked
	d FSC (half maps; 0.143)	2.9	3.7
	d 99 (full/half1/half2)	3.8/1.6/1.6	3.7/1.6/1.6
	d moel	3.7	3.7
	d FSC moel (0/0.143/0.5)	3.6/3.6/3.8	3.6/3.7/3.9
	Map min/max/mean	-0.42/0.86/0.00
	Model vs. Data
	CC (mask)	0.81
	CC (box)	0.75
	CC (peaks)	0.7
	CC (volume)	0.81
	Mean CC for ligands	0.71
